# Supplementary material for: T cell antigen discovery via trogocytosis
Source: Springer Nature journal article supplement (doi:10.1038/s41592-018-0305-7), 2019-01-28
Supplement: MOESM4 [file 41592_2018_305_MOESM4_ESM.xls]

## Sheet: Table S1
Epitope ID	Object Type	Epitope Peptide	Nucleotide Backtranslation	Oligo	Starting Position	Ending Position	Antigen Name	Antigen IRI	Parent Protein	Parent Protein IRI	Organism Name	Organism IRI	Parent Organism	Parent Organism IRI	Epitope Comments	Epitope Relationship		IEDB
155	Linear peptide	AAGIGILTV	GCCGCCGGCATCGGCATCCTGACCGTG	CAGGAGGGCTCGGCAgccgccggcatcggcatcctgaccgtgGGATGCGGAGGGTCCGGCGGCCGCTCATCTCGTGCGACATCAAGCTATACTCTAATAT	27	35	Melanoma antigen recognized by T-cells 1	http://www.ncbi.nlm.nih.gov/protein/Q16655.1	Melanoma antigen recognized by T-cells 1	http://www.uniprot.org/uniprot/Q16655	Homo sapiens	http://purl.obolibrary.org/obo/NCBITaxon_9606	Homo sapiens	http://purl.obolibrary.org/obo/NCBITaxon_9606				http://www.iedb.org/home_v3.php
449	Linear peptide	AASTLLYATV	GCCGCCAGCACCCTGCTGTACGCCACCGTG	CAGGAGGGCTCGGCAgccgccagcaccctgctgtacgccaccgtgGGATGCGGAGGGTCCGGCGGCCGCTCATCTCGTGCGACATCAAGCTATACTCTAA	377	386	Trans-sialidase, putative (UniProt:K4DPA8)	http://www.ncbi.nlm.nih.gov/protein/JH0823	Trans-sialidase, putative	http://www.uniprot.org/uniprot/K4DPA8	Trypanosoma cruzi	http://purl.obolibrary.org/obo/NCBITaxon_5693	Trypanosoma cruzi	http://purl.obolibrary.org/obo/NCBITaxon_5693				Linear Epitopes,
551	Linear peptide	ACDPHSGHFV	GCCTGCGACCCCCACAGCGGCCACTTCGTG	CAGGAGGGCTCGGCAgcctgcgacccccacagcggccacttcgtgGGATGCGGAGGGTCCGGCGGCCGCTCATCTCGTGCGACATCAAGCTATACTCTAA	23	32	Cyclin-dependent kinase 4	http://www.ncbi.nlm.nih.gov/protein/CAA88834.1	Cyclin-dependent kinase 4	http://www.uniprot.org/uniprot/P11802	Homo sapiens	http://purl.obolibrary.org/obo/NCBITaxon_9606	Homo sapiens	http://purl.obolibrary.org/obo/NCBITaxon_9606				No Antigen Organism or Antigen Name (default),
716	Linear peptide	ADLMGYIPLV	GCCGACCTGATGGGCTACATCCCCCTGGTG	CAGGAGGGCTCGGCAgccgacctgatgggctacatccccctggtgGGATGCGGAGGGTCCGGCGGCCGCTCATCTCGTGCGACATCAAGCTATACTCTAA	131	140	Genome polyprotein	http://www.ncbi.nlm.nih.gov/protein/BAA00705.1	Genome polyprotein	http://www.uniprot.org/uniprot/P27958	Hepatitis C virus	http://purl.obolibrary.org/obo/NCBITaxon_11103	Hepatitis C virus	http://purl.obolibrary.org/obo/NCBITaxon_11103				Human Host,
1938	Linear peptide	AIIDPLIYA	GCCATCATCGACCCCCTGATCTACGCC	CAGGAGGGCTCGGCAgccatcatcgaccccctgatctacgccGGATGCGGAGGGTCCGGCGGCCGCTCATCTCGTGCGACATCAAGCTATACTCTAATAT	291	299	Melanocyte-stimulating hormone receptor	http://www.ncbi.nlm.nih.gov/protein/Q01726.2	Melanocyte-stimulating hormone receptor	http://www.uniprot.org/uniprot/Q01726	Homo sapiens	http://purl.obolibrary.org/obo/NCBITaxon_9606	Homo sapiens	http://purl.obolibrary.org/obo/NCBITaxon_9606				All assays checked (default),
1955	Linear peptide	AIIRILQQL	GCCATCATCAGGATCCTGCAGCAGCTG	CAGGAGGGCTCGGCAgccatcatcaggatcctgcagcagctgGGATGCGGAGGGTCCGGCGGCCGCTCATCTCGTGCGACATCAAGCTATACTCTAATAT	59	67	Protein Vpr	http://www.ncbi.nlm.nih.gov/protein/BAA93980.1	Protein Vpr	http://www.uniprot.org/uniprot/P69726	Human immunodeficiency virus 1	http://purl.obolibrary.org/obo/NCBITaxon_11676	Human immunodeficiency virus 1	http://purl.obolibrary.org/obo/NCBITaxon_11676				HLA-A*02:01,
1956	Linear peptide	AIISGDSPV	GCCATCATCAGCGGCGACAGCCCCGTG	CAGGAGGGCTCGGCAgccatcatcagcggcgacagccccgtgGGATGCGGAGGGTCCGGCGGCCGCTCATCTCGTGCGACATCAAGCTATACTCTAATAT	65	73	Myeloid cell surface antigen CD33	http://www.ncbi.nlm.nih.gov/protein/AAA51948.1	Myeloid cell surface antigen CD33	http://www.uniprot.org/uniprot/P20138	Homo sapiens	http://purl.obolibrary.org/obo/NCBITaxon_9606	Homo sapiens	http://purl.obolibrary.org/obo/NCBITaxon_9606				Any Disease (default)
1994	Linear peptide	AILHTPGCV	GCCATCCTGCACACCCCCGGCTGCGTG	CAGGAGGGCTCGGCAgccatcctgcacacccccggctgcgtgGGATGCGGAGGGTCCGGCGGCCGCTCATCTCGTGCGACATCAAGCTATACTCTAATAT	219	227	Genome polyprotein	http://www.ncbi.nlm.nih.gov/protein/BAA00705.1	Genome polyprotein	http://www.uniprot.org/uniprot/P27958	Hepatitis C virus subtype 1a	http://purl.obolibrary.org/obo/NCBITaxon_31646	Hepatitis C virus	http://purl.obolibrary.org/obo/NCBITaxon_11103
2014	Linear peptide	AIMDKNIIL	GCCATCATGGACAAGAACATCATCCTG	CAGGAGGGCTCGGCAgccatcatggacaagaacatcatcctgGGATGCGGAGGGTCCGGCGGCCGCTCATCTCGTGCGACATCAAGCTATACTCTAATAT	122	130	Non-structural protein 1	http://www.ncbi.nlm.nih.gov/protein/O57276.1	Non-structural protein 1	http://www.uniprot.org/uniprot/P03496	Influenza A virus (A/herring gull/DE/677/1988(H2N8))	http://purl.obolibrary.org/obo/NCBITaxon_387243	Influenza A virus	http://purl.obolibrary.org/obo/NCBITaxon_11320				13319 Records found, results exported
2015	Linear peptide	AIMDKNIML	GCCATCATGGACAAGAACATCATGCTG	CAGGAGGGCTCGGCAgccatcatggacaagaacatcatgctgGGATGCGGAGGGTCCGGCGGCCGCTCATCTCGTGCGACATCAAGCTATACTCTAATAT	122	130	Non-structural protein 1	http://www.ncbi.nlm.nih.gov/protein/AFM71972.1	Non-structural protein 1	http://www.uniprot.org/uniprot/P03496	Influenza A virus (A/Victoria/3/1975(H3N2))	http://purl.obolibrary.org/obo/NCBITaxon_392809	Influenza A virus	http://purl.obolibrary.org/obo/NCBITaxon_11320
2016	Linear peptide	AIMDKNITL	GCCATCATGGACAAGAACATCACCCTG	CAGGAGGGCTCGGCAgccatcatggacaagaacatcaccctgGGATGCGGAGGGTCCGGCGGCCGCTCATCTCGTGCGACATCAAGCTATACTCTAATAT	117	125	Non-structural protein 1	http://www.ncbi.nlm.nih.gov/protein/ABL08591.1	Non-structural protein 1	http://www.uniprot.org/uniprot/P03496	H5N1 subtype	http://purl.obolibrary.org/obo/NCBITaxon_102793	Influenza A virus	http://purl.obolibrary.org/obo/NCBITaxon_11320				Script settings:
2017	Linear peptide	AIMDKTIIL	GCCATCATGGACAAGACCATCATCCTG	CAGGAGGGCTCGGCAgccatcatggacaagaccatcatcctgGGATGCGGAGGGTCCGGCGGCCGCTCATCTCGTGCGACATCAAGCTATACTCTAATAT	117	125	Non-structural protein 1	http://www.ncbi.nlm.nih.gov/protein/BAG71021.1	Non-structural protein 1	http://www.uniprot.org/uniprot/P03496	H5N1 subtype	http://purl.obolibrary.org/obo/NCBITaxon_102793	Influenza A virus	http://purl.obolibrary.org/obo/NCBITaxon_11320				Strip modifications
2019	Linear peptide	AIMDKVIIL	GCCATCATGGACAAGGTGATCATCCTG	CAGGAGGGCTCGGCAgccatcatggacaaggtgatcatcctgGGATGCGGAGGGTCCGGCGGCCGCTCATCTCGTGCGACATCAAGCTATACTCTAATAT	114	122	Non-structural protein 1	http://www.ncbi.nlm.nih.gov/protein/ACF17971.1	Non-structural protein 1	http://www.uniprot.org/uniprot/P03496	H5N1 subtype	http://purl.obolibrary.org/obo/NCBITaxon_102793	Influenza A virus	http://purl.obolibrary.org/obo/NCBITaxon_11320				Skip epitopes with 'X' amino acid
2021	Linear peptide	AIMEKNIIL	GCCATCATGGAGAAGAACATCATCCTG	CAGGAGGGCTCGGCAgccatcatggagaagaacatcatcctgGGATGCGGAGGGTCCGGCGGCCGCTCATCTCGTGCGACATCAAGCTATACTCTAATAT	122	130	Non-structural protein 1	http://www.ncbi.nlm.nih.gov/protein/AAG10764.1	Non-structural protein 1	http://www.uniprot.org/uniprot/P03496	Influenza A virus (A/Indiana/08/2011(H3N2))	http://purl.obolibrary.org/obo/NCBITaxon_1081253	Influenza A virus	http://purl.obolibrary.org/obo/NCBITaxon_11320				Restrict length to 8-12 AA (Skip length < 8 and length > 12)
2022	Linear peptide	AIMEKNIML	GCCATCATGGAGAAGAACATCATGCTG	CAGGAGGGCTCGGCAgccatcatggagaagaacatcatgctgGGATGCGGAGGGTCCGGCGGCCGCTCATCTCGTGCGACATCAAGCTATACTCTAATAT	122	130	Non-structural protein 1	http://www.ncbi.nlm.nih.gov/protein/AAC63493.1	Non-structural protein 1	http://www.uniprot.org/uniprot/P03496	Influenza A virus	http://purl.obolibrary.org/obo/NCBITaxon_11320	Influenza A virus	http://purl.obolibrary.org/obo/NCBITaxon_11320				Skip duplicates
2102	Linear peptide	AITEVECFL	GCCATCACCGAGGTGGAGTGCTTCCTG	CAGGAGGGCTCGGCAgccatcaccgaggtggagtgcttcctgGGATGCGGAGGGTCCGGCGGCCGCTCATCTCGTGCGACATCAAGCTATACTCTAATAT	44	52	Human polyomavirus 1 protein	http://www.ncbi.nlm.nih.gov/protein/BAF93325.1			Human polyomavirus 1	http://purl.obolibrary.org/obo/NCBITaxon_1891762	Human polyomavirus 1	http://purl.obolibrary.org/obo/NCBITaxon_1891762
2387	Linear peptide	ALAHGVRAL	GCCCTGGCCCACGGCGTGAGGGCCCTG	CAGGAGGGCTCGGCAgccctggcccacggcgtgagggccctgGGATGCGGAGGGTCCGGCGGCCGCTCATCTCGTGCGACATCAAGCTATACTCTAATAT	150	158	Genome polyprotein	http://www.ncbi.nlm.nih.gov/protein/O39929.3	Genome polyprotein	http://www.uniprot.org/uniprot/P27958	Hepatitis C virus	http://purl.obolibrary.org/obo/NCBITaxon_11103	Hepatitis C virus	http://purl.obolibrary.org/obo/NCBITaxon_11103				Added column for Oligo
2441	Linear peptide	ALAPSTMKI	GCCCTGGCCCCCAGCACCATGAAGATC	CAGGAGGGCTCGGCAgccctggcccccagcaccatgaagatcGGATGCGGAGGGTCCGGCGGCCGCTCATCTCGTGCGACATCAAGCTATACTCTAATAT	319	327	Actin, cytoplasmic 1	http://www.ncbi.nlm.nih.gov/protein/BAD96752.1	Actin, cytoplasmic 1	http://www.uniprot.org/uniprot/P60709	Homo sapiens	http://purl.obolibrary.org/obo/NCBITaxon_9606	Homo sapiens	http://purl.obolibrary.org/obo/NCBITaxon_9606				=LEFT("CAGGAGGGCTCGGCA"&LOWER(D2)&"GGATGCGGAGGGTCC"&"G"&"GCGGCCGC"&"TCATCTCGTGCGACATCAAGCTATACTCTAATATAGCATTCCGTTCGAGTATAGCAG",100)
2453	Linear peptide	ALAYGIDKV	GCCCTGGCCTACGGCATCGACAAGGTG	CAGGAGGGCTCGGCAgccctggcctacggcatcgacaaggtgGGATGCGGAGGGTCCGGCGGCCGCTCATCTCGTGCGACATCAAGCTATACTCTAATAT	179	187	Chaperone protein DnaK	http://www.ncbi.nlm.nih.gov/protein/P27542.1	Chaperone protein DnaK	http://www.uniprot.org/uniprot/P27542	Chlamydia pneumoniae	http://purl.obolibrary.org/obo/NCBITaxon_83558	Chlamydia pneumoniae	http://purl.obolibrary.org/obo/NCBITaxon_83558
2467	Linear peptide	ALDEKLFLI	GCCCTGGACGAGAAGCTGTTCCTGATC	CAGGAGGGCTCGGCAgccctggacgagaagctgttcctgatcGGATGCGGAGGGTCCGGCGGCCGCTCATCTCGTGCGACATCAAGCTATACTCTAATAT	273	281	Intermediate transcription factor 3 large subunit	http://www.ncbi.nlm.nih.gov/protein/CAM58314.1	Intermediate transcription factor 3 large subunit	http://www.uniprot.org/uniprot/Q80HV2	Vaccinia virus Ankara	http://purl.obolibrary.org/obo/NCBITaxon_126794	Vaccinia virus	http://purl.obolibrary.org/obo/NCBITaxon_10245
2469	Linear peptide	ALDGGNKHFL	GCCCTGGACGGCGGCAACAAGCACTTCCTG	CAGGAGGGCTCGGCAgccctggacggcggcaacaagcacttcctgGGATGCGGAGGGTCCGGCGGCCGCTCATCTCGTGCGACATCAAGCTATACTCTAA	231	240	Melanocyte protein PMEL	http://www.ncbi.nlm.nih.gov/protein/AAA35930.1	Melanocyte protein PMEL	http://www.uniprot.org/uniprot/P40967	Homo sapiens	http://purl.obolibrary.org/obo/NCBITaxon_9606	Homo sapiens	http://purl.obolibrary.org/obo/NCBITaxon_9606
2490	Linear peptide	ALEAFAIAVA	GCCCTGGAGGCCTTCGCCATCGCCGTGGCC	CAGGAGGGCTCGGCAgccctggaggccttcgccatcgccgtggccGGATGCGGAGGGTCCGGCGGCCGCTCATCTCGTGCGACATCAAGCTATACTCTAA	73	82	16S/23S rRNA (cytidine-2'-O)-methyltransferase TlyA	http://www.ncbi.nlm.nih.gov/protein/NP_216210.1	16S/23S rRNA (cytidine-2'-O)-methyltransferase TlyA	http://www.uniprot.org/uniprot/P9WJ63	Mycobacterium tuberculosis	http://purl.obolibrary.org/obo/NCBITaxon_1773	Mycobacterium tuberculosis	http://purl.obolibrary.org/obo/NCBITaxon_1773
2525	Linear peptide	ALFFFDIDL	GCCCTGTTCTTCTTCGACATCGACCTG	CAGGAGGGCTCGGCAgccctgttcttcttcgacatcgacctgGGATGCGGAGGGTCCGGCGGCCGCTCATCTCGTGCGACATCAAGCTATACTCTAATAT	347	355	65 kDa phosphoprotein	http://www.ncbi.nlm.nih.gov/protein/P06725.2	65 kDa phosphoprotein	http://www.uniprot.org/uniprot/Q6SW59	Human herpesvirus 5 strain AD169	http://purl.obolibrary.org/obo/NCBITaxon_10360	Human betaherpesvirus 5	http://purl.obolibrary.org/obo/NCBITaxon_10359
2526	Linear peptide	ALFFFDIDLL	GCCCTGTTCTTCTTCGACATCGACCTGCTG	CAGGAGGGCTCGGCAgccctgttcttcttcgacatcgacctgctgGGATGCGGAGGGTCCGGCGGCCGCTCATCTCGTGCGACATCAAGCTATACTCTAA	347	356	65 kDa phosphoprotein	http://www.ncbi.nlm.nih.gov/protein/CAA35357.1	65 kDa phosphoprotein	http://www.uniprot.org/uniprot/Q6SW59	Human betaherpesvirus 5	http://purl.obolibrary.org/obo/NCBITaxon_10359	Human betaherpesvirus 5	http://purl.obolibrary.org/obo/NCBITaxon_10359
2528	Linear peptide	ALFGALFLA	GCCCTGTTCGGCGCCCTGTTCCTGGCC	CAGGAGGGCTCGGCAgccctgttcggcgccctgttcctggccGGATGCGGAGGGTCCGGCGGCCGCTCATCTCGTGCGACATCAAGCTATACTCTAATAT	2	10	Phospholipid transfer protein	http://www.ncbi.nlm.nih.gov/protein/P55058.1	Phospholipid transfer protein	http://www.uniprot.org/uniprot/P55058	Homo sapiens	http://purl.obolibrary.org/obo/NCBITaxon_9606	Homo sapiens	http://purl.obolibrary.org/obo/NCBITaxon_9606
2549	Linear peptide	ALFYKDGKL	GCCCTGTTCTACAAGGACGGCAAGCTG	CAGGAGGGCTCGGCAgccctgttctacaaggacggcaagctgGGATGCGGAGGGTCCGGCGGCCGCTCATCTCGTGCGACATCAAGCTATACTCTAATAT	3	11	DNA topoisomerase 1B	http://www.ncbi.nlm.nih.gov/protein/P68697.1	DNA topoisomerase 1B	http://www.uniprot.org/uniprot/P68698	Vaccinia virus Copenhagen	http://purl.obolibrary.org/obo/NCBITaxon_10249	Vaccinia virus	http://purl.obolibrary.org/obo/NCBITaxon_10245
2556	Linear peptide	ALGGGATGV	GCCCTGGGCGGCGGCGCCACCGGCGTG	CAGGAGGGCTCGGCAgccctgggcggcggcgccaccggcgtgGGATGCGGAGGGTCCGGCGGCCGCTCATCTCGTGCGACATCAAGCTATACTCTAATAT	385	393	Uncharacterized PE-PGRS family protein PE_PGRS33	http://www.ncbi.nlm.nih.gov/protein/AAU10330.1	Uncharacterized PE-PGRS family protein PE_PGRS33	http://www.uniprot.org/uniprot/P9WIF5	Mycobacterium tuberculosis	http://purl.obolibrary.org/obo/NCBITaxon_1773	Mycobacterium tuberculosis	http://purl.obolibrary.org/obo/NCBITaxon_1773
2685	Linear peptide	ALLAGSEYL	GCCCTGCTGGCCGGCAGCGAGTACCTG	CAGGAGGGCTCGGCAgccctgctggccggcagcgagtacctgGGATGCGGAGGGTCCGGCGGCCGCTCATCTCGTGCGACATCAAGCTATACTCTAATAT	439	447	Eukaryotic translation initiation factor 3 subunit D	http://www.ncbi.nlm.nih.gov/protein/NP_003744.1	Eukaryotic translation initiation factor 3 subunit D	http://www.uniprot.org/uniprot/O15371	Homo sapiens	http://purl.obolibrary.org/obo/NCBITaxon_9606	Homo sapiens	http://purl.obolibrary.org/obo/NCBITaxon_9606
2698	Linear peptide	ALLEDPVGT	GCCCTGCTGGAGGACCCCGTGGGCACC	CAGGAGGGCTCGGCAgccctgctggaggaccccgtgggcaccGGATGCGGAGGGTCCGGCGGCCGCTCATCTCGTGCGACATCAAGCTATACTCTAATAT	302	310	Envelope glycoprotein D	http://www.ncbi.nlm.nih.gov/protein/Q69091.1	Envelope glycoprotein D	http://www.uniprot.org/uniprot/Q69091	Herpes simplex virus (type 1 / strain 17)	http://purl.obolibrary.org/obo/NCBITaxon_10299	Human alphaherpesvirus 1	http://purl.obolibrary.org/obo/NCBITaxon_10298
2747	Linear peptide	ALMDKSLHV	GCCCTGATGGACAAGAGCCTGCACGTG	CAGGAGGGCTCGGCAgccctgatggacaagagcctgcacgtgGGATGCGGAGGGTCCGGCGGCCGCTCATCTCGTGCGACATCAAGCTATACTCTAATAT	56	64	Melanoma antigen recognized by T-cells 1	http://www.ncbi.nlm.nih.gov/protein/NP_005502.1	Melanoma antigen recognized by T-cells 1	http://www.uniprot.org/uniprot/Q16655	Homo sapiens	http://purl.obolibrary.org/obo/NCBITaxon_9606	Homo sapiens	http://purl.obolibrary.org/obo/NCBITaxon_9606
2758	Linear peptide	ALMPLYACI	GCCCTGATGCCCCTGTACGCCTGCATC	CAGGAGGGCTCGGCAgccctgatgcccctgtacgcctgcatcGGATGCGGAGGGTCCGGCGGCCGCTCATCTCGTGCGACATCAAGCTATACTCTAATAT	642	650	Protein P	http://www.ncbi.nlm.nih.gov/protein/CAA10434.1	Protein P	http://www.uniprot.org/uniprot/Q69028	Hepatitis B virus	http://purl.obolibrary.org/obo/NCBITaxon_10407	Hepatitis B virus	http://purl.obolibrary.org/obo/NCBITaxon_10407	Imported from the TopBank database.
2797	Linear peptide	ALNSKDAAL	GCCCTGAACAGCAAGGACGCCGCCCTG	CAGGAGGGCTCGGCAgccctgaacagcaaggacgccgccctgGGATGCGGAGGGTCCGGCGGCCGCTCATCTCGTGCGACATCAAGCTATACTCTAATAT	141	149	Lamin-B1	http://www.ncbi.nlm.nih.gov/protein/AAH12295.1	Lamin-B1	http://www.uniprot.org/uniprot/P20700	Homo sapiens	http://purl.obolibrary.org/obo/NCBITaxon_9606	Homo sapiens	http://purl.obolibrary.org/obo/NCBITaxon_9606
2801	Linear peptide	ALNTLVKQL	GCCCTGAACACCCTGGTGAAGCAGCTG	CAGGAGGGCTCGGCAgccctgaacaccctggtgaagcagctgGGATGCGGAGGGTCCGGCGGCCGCTCATCTCGTGCGACATCAAGCTATACTCTAATAT	940	948	Spike glycoprotein	http://www.ncbi.nlm.nih.gov/protein/ABF65836.1	Spike glycoprotein	http://www.uniprot.org/uniprot/P59594	SARS coronavirus	http://purl.obolibrary.org/obo/NCBITaxon_227859	SARS-related coronavirus	http://purl.obolibrary.org/obo/NCBITaxon_694009
2802	Linear peptide	ALNTPKDHI	GCCCTGAACACCCCCAAGGACCACATC	CAGGAGGGCTCGGCAgccctgaacacccccaaggaccacatcGGATGCGGAGGGTCCGGCGGCCGCTCATCTCGTGCGACATCAAGCTATACTCTAATAT	139	147	Nucleoprotein	http://www.ncbi.nlm.nih.gov/protein/P59595.1	Nucleoprotein	http://www.uniprot.org/uniprot/P59595	SARS coronavirus	http://purl.obolibrary.org/obo/NCBITaxon_227859	SARS-related coronavirus	http://purl.obolibrary.org/obo/NCBITaxon_694009
2814	Linear peptide	ALPHIIDEV	GCCCTGCCCCACATCATCGACGAGGTG	CAGGAGGGCTCGGCAgccctgccccacatcatcgacgaggtgGGATGCGGAGGGTCCGGCGGCCGCTCATCTCGTGCGACATCAAGCTATACTCTAATAT	10	18	Pre-glycoprotein polyprotein GP complex	http://www.ncbi.nlm.nih.gov/protein/P09991.1	Pre-glycoprotein polyprotein GP complex	http://www.uniprot.org/uniprot/P09991	Lymphocytic choriomeningitis virus (strain Armstrong) (clone 53b)	https://ontology.iedb.org/ontology/ONTIE_0000397	Lymphocytic choriomeningitis mammarenavirus	http://purl.obolibrary.org/obo/NCBITaxon_11623
2857	Linear peptide	ALREEEEGV	GCCCTGAGGGAGGAGGAGGAGGGCGTG	CAGGAGGGCTCGGCAgccctgagggaggaggaggagggcgtgGGATGCGGAGGGTCCGGCGGCCGCTCATCTCGTGCGACATCAAGCTATACTCTAATAT	301	309	Melanoma-associated antigen 1	http://www.ncbi.nlm.nih.gov/protein/NP_004979.3	Melanoma-associated antigen 1	http://www.uniprot.org/uniprot/P43355	Homo sapiens	http://purl.obolibrary.org/obo/NCBITaxon_9606	Homo sapiens	http://purl.obolibrary.org/obo/NCBITaxon_9606
2860	Linear peptide	ALRGMGLNA	GCCCTGAGGGGCATGGGCCTGAACGCC	CAGGAGGGCTCGGCAgccctgaggggcatgggcctgaacgccGGATGCGGAGGGTCCGGCGGCCGCTCATCTCGTGCGACATCAAGCTATACTCTAATAT	1411	1419	Genome polyprotein	http://www.ncbi.nlm.nih.gov/protein/AAU89634.1	Genome polyprotein	http://www.uniprot.org/uniprot/P27958	Hepatitis C virus	http://purl.obolibrary.org/obo/NCBITaxon_11103	Hepatitis C virus	http://purl.obolibrary.org/obo/NCBITaxon_11103
2861	Linear peptide	ALRGMGVNAV	GCCCTGAGGGGCATGGGCGTGAACGCCGTG	CAGGAGGGCTCGGCAgccctgaggggcatgggcgtgaacgccgtgGGATGCGGAGGGTCCGGCGGCCGCTCATCTCGTGCGACATCAAGCTATACTCTAA	1410	1419	Genome polyprotein	http://www.ncbi.nlm.nih.gov/protein/ANN11870.1	Genome polyprotein	http://www.uniprot.org/uniprot/P27958	Hepatitis C virus	http://purl.obolibrary.org/obo/NCBITaxon_11103	Hepatitis C virus	http://purl.obolibrary.org/obo/NCBITaxon_11103
2874	Linear peptide	ALSDHHIYL	GCCCTGAGCGACCACCACATCTACCTG	CAGGAGGGCTCGGCAgccctgagcgaccaccacatctacctgGGATGCGGAGGGTCCGGCGGCCGCTCATCTCGTGCGACATCAAGCTATACTCTAATAT			Unidentified protein	https://ontology.iedb.org/ontology/ONTIE_0002162			unidentified	http://purl.obolibrary.org/obo/NCBITaxon_32644	unidentified	http://purl.obolibrary.org/obo/NCBITaxon_32644
2877	Linear peptide	ALSELPETL	GCCCTGAGCGAGCTGCCCGAGACCCTG	CAGGAGGGCTCGGCAgccctgagcgagctgcccgagaccctgGGATGCGGAGGGTCCGGCGGCCGCTCATCTCGTGCGACATCAAGCTATACTCTAATAT	2137	2145	Genome polyprotein	http://www.ncbi.nlm.nih.gov/protein/AGO67248.1	Genome polyprotein	http://www.uniprot.org/uniprot/P17763	Dengue virus 2 S221	https://ontology.iedb.org/ontology/ONTIE_0001442	Dengue virus	http://purl.obolibrary.org/obo/NCBITaxon_12637
2883	Linear peptide	ALSLAAVLV	GCCCTGAGCCTGGCCGCCGTGCTGGTG	CAGGAGGGCTCGGCAgccctgagcctggccgccgtgctggtgGGATGCGGAGGGTCCGGCGGCCGCTCATCTCGTGCGACATCAAGCTATACTCTAATAT	7	15	Cysteine peptidase, putative,cysteine peptidase, clan CA, family C1, cathepsin L-like, putative (UniProt:K4DPT9)	http://www.ncbi.nlm.nih.gov/protein/A45629	Cysteine peptidase, putative,cysteine peptidase, clan CA, family C1, cathepsin L-like, putative	http://www.uniprot.org/uniprot/K4DPT9	Trypanosoma cruzi	http://purl.obolibrary.org/obo/NCBITaxon_5693	Trypanosoma cruzi	http://purl.obolibrary.org/obo/NCBITaxon_5693
2884	Linear peptide	ALSLAAVLVV	GCCCTGAGCCTGGCCGCCGTGCTGGTGGTG	CAGGAGGGCTCGGCAgccctgagcctggccgccgtgctggtggtgGGATGCGGAGGGTCCGGCGGCCGCTCATCTCGTGCGACATCAAGCTATACTCTAA	7	16	Cysteine peptidase, putative,cysteine peptidase, clan CA, family C1, cathepsin L-like, putative (UniProt:K4DPT9)	http://www.ncbi.nlm.nih.gov/protein/A45629	Cysteine peptidase, putative,cysteine peptidase, clan CA, family C1, cathepsin L-like, putative	http://www.uniprot.org/uniprot/K4DPT9	Trypanosoma cruzi	http://purl.obolibrary.org/obo/NCBITaxon_5693	Trypanosoma cruzi	http://purl.obolibrary.org/obo/NCBITaxon_5693
2901	Linear peptide	ALSTGLIHL	GCCCTGAGCACCGGCCTGATCCACCTG	CAGGAGGGCTCGGCAgccctgagcaccggcctgatccacctgGGATGCGGAGGGTCCGGCGGCCGCTCATCTCGTGCGACATCAAGCTATACTCTAATAT	684	692	Genome polyprotein	http://www.ncbi.nlm.nih.gov/protein/ABV46054.1	Genome polyprotein	http://www.uniprot.org/uniprot/P27958	Hepatitis C virus genotype 1	http://purl.obolibrary.org/obo/NCBITaxon_41856	Hepatitis C virus	http://purl.obolibrary.org/obo/NCBITaxon_11103	The epitope sequence is conserved among HCV genotypes 1a and 1b. The epitope is part of the E2 protein.
2995	Linear peptide	ALWDIETGQQTV	GCCCTGTGGGACATCGAGACCGGCCAGCAGACCGTG	CAGGAGGGCTCGGCAgccctgtgggacatcgagaccggccagcagaccgtgGGATGCGGAGGGTCCGGCGGCCGCTCATCTCGTGCGACATCAAGCTATA	167	178	Guanine nucleotide-binding protein G(I)/G(S)/G(T) subunit beta-2	http://www.ncbi.nlm.nih.gov/protein/P62879.3	Guanine nucleotide-binding protein G(I)/G(S)/G(T) subunit beta-2	http://www.uniprot.org/uniprot/P62879	Homo sapiens	http://purl.obolibrary.org/obo/NCBITaxon_9606	Homo sapiens	http://purl.obolibrary.org/obo/NCBITaxon_9606
2999	Linear peptide	ALWGFFPVL	GCCCTGTGGGGCTTCTTCCCCGTGCTG	CAGGAGGGCTCGGCAgccctgtggggcttcttccccgtgctgGGATGCGGAGGGTCCGGCGGCCGCTCATCTCGTGCGACATCAAGCTATACTCTAATAT	4	12	ER membrane protein complex subunit 7	http://www.ncbi.nlm.nih.gov/protein/NP_064539.1	ER membrane protein complex subunit 7	http://www.uniprot.org/uniprot/Q9NPA0	Homo sapiens	http://purl.obolibrary.org/obo/NCBITaxon_9606	Homo sapiens	http://purl.obolibrary.org/obo/NCBITaxon_9606
3017	Linear peptide	ALYDVVSKL	GCCCTGTACGACGTGGTGAGCAAGCTG	CAGGAGGGCTCGGCAgccctgtacgacgtggtgagcaagctgGGATGCGGAGGGTCCGGCGGCCGCTCATCTCGTGCGACATCAAGCTATACTCTAATAT	2594	2602	Genome polyprotein	http://www.ncbi.nlm.nih.gov/protein/ABR25251.1	Genome polyprotein	http://www.uniprot.org/uniprot/P27958	Hepatitis C virus	http://purl.obolibrary.org/obo/NCBITaxon_11103	Hepatitis C virus	http://purl.obolibrary.org/obo/NCBITaxon_11103
3019	Linear peptide	ALYDVVTKL	GCCCTGTACGACGTGGTGACCAAGCTG	CAGGAGGGCTCGGCAgccctgtacgacgtggtgaccaagctgGGATGCGGAGGGTCCGGCGGCCGCTCATCTCGTGCGACATCAAGCTATACTCTAATAT	2594	2602	Genome polyprotein	http://www.ncbi.nlm.nih.gov/protein/P26664.3	Genome polyprotein	http://www.uniprot.org/uniprot/P27958	Hepatitis C virus subtype 1a	http://purl.obolibrary.org/obo/NCBITaxon_31646	Hepatitis C virus	http://purl.obolibrary.org/obo/NCBITaxon_11103
3022	Linear peptide	ALYEKKLAL	GCCCTGTACGAGAAGAAGCTGGCCCTG	CAGGAGGGCTCGGCAgccctgtacgagaagaagctggccctgGGATGCGGAGGGTCCGGCGGCCGCTCATCTCGTGCGACATCAAGCTATACTCTAATAT	2421	2429	Genome polyprotein	http://www.ncbi.nlm.nih.gov/protein/P03314.1	Genome polyprotein	http://www.uniprot.org/uniprot/P03314	Yellow fever virus 17D	http://purl.obolibrary.org/obo/NCBITaxon_11090	Yellow fever virus	http://purl.obolibrary.org/obo/NCBITaxon_11089
3064	Linear peptide	AMASTEGNV	GCCATGGCCAGCACCGAGGGCAACGTG	CAGGAGGGCTCGGCAgccatggccagcaccgagggcaacgtgGGATGCGGAGGGTCCGGCGGCCGCTCATCTCGTGCGACATCAAGCTATACTCTAATAT	82	90	6 kDa early secretory antigenic target	http://www.ncbi.nlm.nih.gov/protein/P0A564.2	6 kDa early secretory antigenic target	http://www.uniprot.org/uniprot/P9WNK7	Mycobacterium tuberculosis	http://purl.obolibrary.org/obo/NCBITaxon_1773	Mycobacterium tuberculosis	http://purl.obolibrary.org/obo/NCBITaxon_1773
3078	Linear peptide	AMDSNTLEL	GCCATGGACAGCAACACCCTGGAGCTG	CAGGAGGGCTCGGCAgccatggacagcaacaccctggagctgGGATGCGGAGGGTCCGGCGGCCGCTCATCTCGTGCGACATCAAGCTATACTCTAATAT	373	381	Nucleoprotein	http://www.ncbi.nlm.nih.gov/protein/AAT70629.1	Nucleoprotein	http://www.uniprot.org/uniprot/P03466	H5N1 subtype	http://purl.obolibrary.org/obo/NCBITaxon_102793	Influenza A virus	http://purl.obolibrary.org/obo/NCBITaxon_11320
3146	Linear peptide	AMLDLLKSV	GCCATGCTGGACCTGCTGAAGAGCGTG	CAGGAGGGCTCGGCAgccatgctggacctgctgaagagcgtgGGATGCGGAGGGTCCGGCGGCCGCTCATCTCGTGCGACATCAAGCTATACTCTAATAT	664	672	Proto-oncogene DBL	http://www.ncbi.nlm.nih.gov/protein/P10911.3	Proto-oncogene DBL	http://www.uniprot.org/uniprot/P10911	Homo sapiens	http://purl.obolibrary.org/obo/NCBITaxon_9606	Homo sapiens	http://purl.obolibrary.org/obo/NCBITaxon_9606
3147	Linear peptide	AMLGTHTMEV	GCCATGCTGGGCACCCACACCATGGAGGTG	CAGGAGGGCTCGGCAgccatgctgggcacccacaccatggaggtgGGATGCGGAGGGTCCGGCGGCCGCTCATCTCGTGCGACATCAAGCTATACTCTAA	184	193	Melanocyte protein PMEL	http://www.ncbi.nlm.nih.gov/protein/AAA35930.1	Melanocyte protein PMEL	http://www.uniprot.org/uniprot/P40967	Homo sapiens	http://purl.obolibrary.org/obo/NCBITaxon_9606	Homo sapiens	http://purl.obolibrary.org/obo/NCBITaxon_9606
3148	Linear peptide	AMLHWSLIL	GCCATGCTGCACTGGAGCCTGATCCTG	CAGGAGGGCTCGGCAgccatgctgcactggagcctgatcctgGGATGCGGAGGGTCCGGCGGCCGCTCATCTCGTGCGACATCAAGCTATACTCTAATAT	2372	2380	Genome polyprotein	http://www.ncbi.nlm.nih.gov/protein/P03314.1	Genome polyprotein	http://www.uniprot.org/uniprot/P03314	Yellow fever virus 17D	http://purl.obolibrary.org/obo/NCBITaxon_11090	Yellow fever virus	http://purl.obolibrary.org/obo/NCBITaxon_11089
3151	Linear peptide	AMLNGLIYV	GCCATGCTGAACGGCCTGATCTACGTG	CAGGAGGGCTCGGCAgccatgctgaacggcctgatctacgtgGGATGCGGAGGGTCCGGCGGCCGCTCATCTCGTGCGACATCAAGCTATACTCTAATAT	391	399	Kelch repeat and BTB domain-containing protein A55	http://www.ncbi.nlm.nih.gov/protein/P21073.1	Kelch repeat and BTB domain-containing protein A55	http://www.uniprot.org/uniprot/P24768	Vaccinia virus	http://purl.obolibrary.org/obo/NCBITaxon_10245	Vaccinia virus	http://purl.obolibrary.org/obo/NCBITaxon_10245
3203	Linear peptide	AMVGAVLTA	GCCATGGTGGGCGCCGTGCTGACCGCC	CAGGAGGGCTCGGCAgccatggtgggcgccgtgctgaccgccGGATGCGGAGGGTCCGGCGGCCGCTCATCTCGTGCGACATCAAGCTATACTCTAATAT	482	490	Tyrosinase	http://www.ncbi.nlm.nih.gov/protein/AAK00805.1	Tyrosinase	http://www.uniprot.org/uniprot/P14679	Homo sapiens	http://purl.obolibrary.org/obo/NCBITaxon_9606	Homo sapiens	http://purl.obolibrary.org/obo/NCBITaxon_9606
4002	Linear peptide	AQLLTEFAI	GCCCAGCTGCTGACCGAGTTCGCCATC	CAGGAGGGCTCGGCAgcccagctgctgaccgagttcgccatcGGATGCGGAGGGTCCGGCGGCCGCTCATCTCGTGCGACATCAAGCTATACTCTAATAT	254	262	Uncharacterized PPE family protein PPE46	http://www.ncbi.nlm.nih.gov/protein/NP_337616.1	Uncharacterized PPE family protein PPE46	http://www.uniprot.org/uniprot/P9WHY9	Mycobacterium tuberculosis	http://purl.obolibrary.org/obo/NCBITaxon_1773	Mycobacterium tuberculosis	http://purl.obolibrary.org/obo/NCBITaxon_1773
4506	Linear peptide	ASKNKEKAL	GCCAGCAAGAACAAGGAGAAGGCCCTG	CAGGAGGGCTCGGCAgccagcaagaacaaggagaaggccctgGGATGCGGAGGGTCCGGCGGCCGCTCATCTCGTGCGACATCAAGCTATACTCTAATAT	107	115	Thrombospondin-related anonymous protein, TRAP	http://www.ncbi.nlm.nih.gov/protein/P16893.1	Thrombospondin-related anonymous protein, TRAP	http://www.uniprot.org/uniprot/Q76NM2	Plasmodium falciparum	http://purl.obolibrary.org/obo/NCBITaxon_5833	Plasmodium falciparum	http://purl.obolibrary.org/obo/NCBITaxon_5833
4916	Linear peptide	ATDALMTGF	GCCACCGACGCCCTGATGACCGGCTTC	CAGGAGGGCTCGGCAgccaccgacgccctgatgaccggcttcGGATGCGGAGGGTCCGGCGGCCGCTCATCTCGTGCGACATCAAGCTATACTCTAATAT	1436	1444	Genome polyprotein	http://www.ncbi.nlm.nih.gov/protein/ABU97067.1	Genome polyprotein	http://www.uniprot.org/uniprot/P27958	Hepatitis C virus subtype 1b	http://purl.obolibrary.org/obo/NCBITaxon_31647	Hepatitis C virus	http://purl.obolibrary.org/obo/NCBITaxon_11103	The epitope sequence is present in multiple Hepatitis C virus strains.
4917	Linear peptide	ATDALMTGY	GCCACCGACGCCCTGATGACCGGCTAC	CAGGAGGGCTCGGCAgccaccgacgccctgatgaccggctacGGATGCGGAGGGTCCGGCGGCCGCTCATCTCGTGCGACATCAAGCTATACTCTAATAT	1436	1444	Genome polyprotein	http://www.ncbi.nlm.nih.gov/protein/ACB87119.1	Genome polyprotein	http://www.uniprot.org/uniprot/P27958	Hepatitis C virus subtype 1a	http://purl.obolibrary.org/obo/NCBITaxon_31646	Hepatitis C virus	http://purl.obolibrary.org/obo/NCBITaxon_11103
5213	Linear peptide	ATWAENIQV	GCCACCTGGGCCGAGAACATCCAGGTG	CAGGAGGGCTCGGCAgccacctgggccgagaacatccaggtgGGATGCGGAGGGTCCGGCGGCCGCTCATCTCGTGCGACATCAAGCTATACTCTAATAT	862	870	Genome polyprotein	http://www.ncbi.nlm.nih.gov/protein/YP_001527887.1	Genome polyprotein	http://www.uniprot.org/uniprot/P14335	West Nile virus NY-99	https://ontology.iedb.org/ontology/ONTIE_0000839	West Nile virus	http://purl.obolibrary.org/obo/NCBITaxon_11082	The author provided GenBank identifier was GI:11597240.
5251	Linear peptide	AVAGAAILV	GCCGTGGCCGGCGCCGCCATCCTGGTG	CAGGAGGGCTCGGCAgccgtggccggcgccgccatcctggtgGGATGCGGAGGGTCCGGCGGCCGCTCATCTCGTGCGACATCAAGCTATACTCTAATAT	8	16	Lipoprotein LpqH (UniProt:P9WK61)	http://www.ncbi.nlm.nih.gov/protein/P0A5J0.1	Lipoprotein LpqH	http://www.uniprot.org/uniprot/P9WK61	Mycobacterium tuberculosis	http://purl.obolibrary.org/obo/NCBITaxon_1773	Mycobacterium tuberculosis	http://purl.obolibrary.org/obo/NCBITaxon_1773
5316	Linear peptide	AVFDRKSDAK	GCCGTGTTCGACAGGAAGAGCGACGCCAAG	CAGGAGGGCTCGGCAgccgtgttcgacaggaagagcgacgccaagGGATGCGGAGGGTCCGGCGGCCGCTCATCTCGTGCGACATCAAGCTATACTCTAA	399	408	Epstein-Barr nuclear antigen 4	http://www.ncbi.nlm.nih.gov/protein/CAA24858.1	Epstein-Barr nuclear antigen 4	http://www.uniprot.org/uniprot/P03203	Human gammaherpesvirus 4	http://purl.obolibrary.org/obo/NCBITaxon_10376	Human gammaherpesvirus 4	http://purl.obolibrary.org/obo/NCBITaxon_10376
6431	Linear peptide	CINGCVWTV	TGCATCAACGGCTGCGTGTGGACCGTG	CAGGAGGGCTCGGCAtgcatcaacggctgcgtgtggaccgtgGGATGCGGAGGGTCCGGCGGCCGCTCATCTCGTGCGACATCAAGCTATACTCTAATAT			Genome polyprotein	https://ontology.iedb.org/ontology/ONTIE_0002561	Genome polyprotein	http://www.uniprot.org/uniprot/P27958	Hepatitis C virus	http://purl.obolibrary.org/obo/NCBITaxon_11103	Hepatitis C virus	http://purl.obolibrary.org/obo/NCBITaxon_11103	This peptide was not found in genbank or Swissprot databases. It is naturally found in the NS3 region of hepatitis C virus.
6433	Linear peptide	CINGVCWTA	TGCATCAACGGCGTGTGCTGGACCGCC	CAGGAGGGCTCGGCAtgcatcaacggcgtgtgctggaccgccGGATGCGGAGGGTCCGGCGGCCGCTCATCTCGTGCGACATCAAGCTATACTCTAATAT			Genome polyprotein	https://ontology.iedb.org/ontology/ONTIE_0002561	Genome polyprotein	http://www.uniprot.org/uniprot/P27958	Hepatitis C virus subtype 1a	http://purl.obolibrary.org/obo/NCBITaxon_31646	Hepatitis C virus	http://purl.obolibrary.org/obo/NCBITaxon_11103
6435	Linear peptide	CINGVCWTV	TGCATCAACGGCGTGTGCTGGACCGTG	CAGGAGGGCTCGGCAtgcatcaacggcgtgtgctggaccgtgGGATGCGGAGGGTCCGGCGGCCGCTCATCTCGTGCGACATCAAGCTATACTCTAATAT	1073	1081	Genome polyprotein	http://www.ncbi.nlm.nih.gov/protein/BAB18806.1	Genome polyprotein	http://www.uniprot.org/uniprot/P27958	Hepatitis C virus	http://purl.obolibrary.org/obo/NCBITaxon_11103	Hepatitis C virus	http://purl.obolibrary.org/obo/NCBITaxon_11103
6437	Linear peptide	CINGVWCTV	TGCATCAACGGCGTGTGGTGCACCGTG	CAGGAGGGCTCGGCAtgcatcaacggcgtgtggtgcaccgtgGGATGCGGAGGGTCCGGCGGCCGCTCATCTCGTGCGACATCAAGCTATACTCTAATAT			Genome polyprotein	https://ontology.iedb.org/ontology/ONTIE_0002561	Genome polyprotein	http://www.uniprot.org/uniprot/P27958	Hepatitis C virus	http://purl.obolibrary.org/obo/NCBITaxon_11103	Hepatitis C virus	http://purl.obolibrary.org/obo/NCBITaxon_11103
6536	Linear peptide	CLAGLLTMV	TGCCTGGCCGGCCTGCTGACCATGGTG	CAGGAGGGCTCGGCAtgcctggccggcctgctgaccatggtgGGATGCGGAGGGTCCGGCGGCCGCTCATCTCGTGCGACATCAAGCTATACTCTAATAT	426	434	Latent membrane protein 2	http://www.ncbi.nlm.nih.gov/protein/P13285.1	Latent membrane protein 2	http://www.uniprot.org/uniprot/P13285	Human gammaherpesvirus 4	http://purl.obolibrary.org/obo/NCBITaxon_10376	Human gammaherpesvirus 4	http://purl.obolibrary.org/obo/NCBITaxon_10376		analog
6556	Linear peptide	CLFKDWEEL	TGCCTGTTCAAGGACTGGGAGGAGCTG	CAGGAGGGCTCGGCAtgcctgttcaaggactgggaggagctgGGATGCGGAGGGTCCGGCGGCCGCTCATCTCGTGCGACATCAAGCTATACTCTAATAT	115	123	Protein X	http://www.ncbi.nlm.nih.gov/protein/BAG70907.1	Protein X	http://www.uniprot.org/uniprot/Q69027	Hepatitis B virus	http://purl.obolibrary.org/obo/NCBITaxon_10407	Hepatitis B virus	http://purl.obolibrary.org/obo/NCBITaxon_10407	Epitope sequence present in HBV subtypes adr, adw, and ayw.
6564	Linear peptide	CLGGLITMV	TGCCTGGGCGGCCTGATCACCATGGTG	CAGGAGGGCTCGGCAtgcctgggcggcctgatcaccatggtgGGATGCGGAGGGTCCGGCGGCCGCTCATCTCGTGCGACATCAAGCTATACTCTAATAT			Latent membrane protein 2	https://ontology.iedb.org/ontology/ONTIE_0002376	Latent membrane protein 2	http://www.uniprot.org/uniprot/P13285	Human gammaherpesvirus 4	http://purl.obolibrary.org/obo/NCBITaxon_10376	Human gammaherpesvirus 4	http://purl.obolibrary.org/obo/NCBITaxon_10376	The sequence of this epitope was obtained from a clinical isolate and is not available in GenBank or SwissProt.
6568	Linear peptide	CLGGLLTMV	TGCCTGGGCGGCCTGCTGACCATGGTG	CAGGAGGGCTCGGCAtgcctgggcggcctgctgaccatggtgGGATGCGGAGGGTCCGGCGGCCGCTCATCTCGTGCGACATCAAGCTATACTCTAATAT	294	302	Latent membrane protein 2	http://www.ncbi.nlm.nih.gov/protein/Q69135	Latent membrane protein 2	http://www.uniprot.org/uniprot/P13285	Human gammaherpesvirus 4	http://purl.obolibrary.org/obo/NCBITaxon_10376	Human gammaherpesvirus 4	http://purl.obolibrary.org/obo/NCBITaxon_10376	The epitope sequence is from the reference cited: Lee et al. (1993) J Virol 67: 7428-7435 [PMID: 7693972].
6604	Linear peptide	CLLPKMDSV	TGCCTGCTGCCCAAGATGGACAGCGTG	CAGGAGGGCTCGGCAtgcctgctgcccaagatggacagcgtgGGATGCGGAGGGTCCGGCGGCCGCTCATCTCGTGCGACATCAAGCTATACTCTAATAT	398	406	Human polyomavirus 1 protein	http://www.ncbi.nlm.nih.gov/protein/AAT47414.1			Human polyomavirus 1	http://purl.obolibrary.org/obo/NCBITaxon_1891762	Human polyomavirus 1	http://purl.obolibrary.org/obo/NCBITaxon_1891762
6605	Linear peptide	CLLPKMDSVV	TGCCTGCTGCCCAAGATGGACAGCGTGGTG	CAGGAGGGCTCGGCAtgcctgctgcccaagatggacagcgtggtgGGATGCGGAGGGTCCGGCGGCCGCTCATCTCGTGCGACATCAAGCTATACTCTAA	396	405	Macaca mulatta polyomavirus 1 protein	http://www.ncbi.nlm.nih.gov/protein/ABU86079.1			Macaca mulatta polyomavirus 1	http://purl.obolibrary.org/obo/NCBITaxon_1891767	Macaca mulatta polyomavirus 1	http://purl.obolibrary.org/obo/NCBITaxon_1891767
6615	Linear peptide	CLPACVYGL	TGCCTGCCCGCCTGCGTGTACGGCCTG	CAGGAGGGCTCGGCAtgcctgcccgcctgcgtgtacggcctgGGATGCGGAGGGTCCGGCGGCCGCTCATCTCGTGCGACATCAAGCTATACTCTAATAT	275	283	Nucleoprotein	http://www.ncbi.nlm.nih.gov/protein/AAT70629.1	Nucleoprotein	http://www.uniprot.org/uniprot/P03466	H5N1 subtype	http://purl.obolibrary.org/obo/NCBITaxon_102793	Influenza A virus	http://purl.obolibrary.org/obo/NCBITaxon_11320	The authors report that the epitope was synthesized based on strain H5N1-Thailand-human-2004.
6630	Linear peptide	CLTEYILWV	TGCCTGACCGAGTACATCCTGTGGGTG	CAGGAGGGCTCGGCAtgcctgaccgagtacatcctgtgggtgGGATGCGGAGGGTCCGGCGGCCGCTCATCTCGTGCGACATCAAGCTATACTCTAATAT	79	87	Other Vaccinia virus protein	http://www.ncbi.nlm.nih.gov/protein/AAB96558.1	Protein B14	http://www.uniprot.org/uniprot/P24772	Modified Vaccinia Ankara virus	http://purl.obolibrary.org/obo/NCBITaxon_467144	Vaccinia virus	http://purl.obolibrary.org/obo/NCBITaxon_10245	The epitope sequence is highly conserved in vaccinia virus, variola viruses, cowpox virus and monkeypox virus.
6889	Linear peptide	CQNGACWTS	TGCCAGAACGGCGCCTGCTGGACCAGC	CAGGAGGGCTCGGCAtgccagaacggcgcctgctggaccagcGGATGCGGAGGGTCCGGCGGCCGCTCATCTCGTGCGACATCAAGCTATACTCTAATAT	61	69	Other Triticum aestivum (Canadian hard winter wheat) protein	http://www.ncbi.nlm.nih.gov/protein/P10968.2			Triticum aestivum	http://purl.obolibrary.org/obo/NCBITaxon_4565	Triticum aestivum	http://purl.obolibrary.org/obo/NCBITaxon_4565
7291	Linear peptide	CVNGSCFTV	TGCGTGAACGGCAGCTGCTTCACCGTG	CAGGAGGGCTCGGCAtgcgtgaacggcagctgcttcaccgtgGGATGCGGAGGGTCCGGCGGCCGCTCATCTCGTGCGACATCAAGCTATACTCTAATAT	213	221	Neuraminidase	http://www.ncbi.nlm.nih.gov/protein/AAT73327.1	Neuraminidase	http://www.uniprot.org/uniprot/P03468	Influenza A virus (A/Puerto Rico/8/1934(H1N1))	http://purl.obolibrary.org/obo/NCBITaxon_211044	Influenza A virus	http://purl.obolibrary.org/obo/NCBITaxon_11320
7292	Linear peptide	CVNGVCWTV	TGCGTGAACGGCGTGTGCTGGACCGTG	CAGGAGGGCTCGGCAtgcgtgaacggcgtgtgctggaccgtgGGATGCGGAGGGTCCGGCGGCCGCTCATCTCGTGCGACATCAAGCTATACTCTAATAT	1073	1081	Genome polyprotein	http://www.ncbi.nlm.nih.gov/protein/P26663.3	Genome polyprotein	http://www.uniprot.org/uniprot/P27958	Hepatitis C virus	http://purl.obolibrary.org/obo/NCBITaxon_11103	Hepatitis C virus	http://purl.obolibrary.org/obo/NCBITaxon_11103
7447	Linear peptide	CYVLEETSVML	TGCTACGTGCTGGAGGAGACCAGCGTGATGCTG	CAGGAGGGCTCGGCAtgctacgtgctggaggagaccagcgtgatgctgGGATGCGGAGGGTCCGGCGGCCGCTCATCTCGTGCGACATCAAGCTATACTC	314	324	55 kDa immediate-early protein 1	http://www.ncbi.nlm.nih.gov/protein/AAR31448.1	55 kDa immediate-early protein 1	http://www.uniprot.org/uniprot/F5HCM1	Human betaherpesvirus 5	http://purl.obolibrary.org/obo/NCBITaxon_10359	Human betaherpesvirus 5	http://purl.obolibrary.org/obo/NCBITaxon_10359
8829	Linear peptide	DIYRIFAEL	GACATCTACAGGATCTTCGCCGAGCTG	CAGGAGGGCTCGGCAgacatctacaggatcttcgccgagctgGGATGCGGAGGGTCCGGCGGCCGCTCATCTCGTGCGACATCAAGCTATACTCTAATAT	519	527	65 kDa phosphoprotein	http://www.ncbi.nlm.nih.gov/protein/P06725.2	65 kDa phosphoprotein	http://www.uniprot.org/uniprot/Q6SW59	Human herpesvirus 5 strain AD169	http://purl.obolibrary.org/obo/NCBITaxon_10360	Human betaherpesvirus 5	http://purl.obolibrary.org/obo/NCBITaxon_10359	The authors cite Swiss-Prot accession P06725 (GI: 130714) as the source of the epitope.
9033	Linear peptide	DLCGSVFLV	GACCTGTGCGGCAGCGTGTTCCTGGTG	CAGGAGGGCTCGGCAgacctgtgcggcagcgtgttcctggtgGGATGCGGAGGGTCCGGCGGCCGCTCATCTCGTGCGACATCAAGCTATACTCTAATAT	279	287	Genome polyprotein	http://www.ncbi.nlm.nih.gov/protein/ABV46054.1	Genome polyprotein	http://www.uniprot.org/uniprot/P27958	Hepatitis C virus genotype 1	http://purl.obolibrary.org/obo/NCBITaxon_41856	Hepatitis C virus	http://purl.obolibrary.org/obo/NCBITaxon_11103	The epitope sequence is conserved among HCV genotypes 1a and 1b. The epitope is part of the E1 protein.
9041	Linear peptide	DLDEPEQFRL	GACCTGGACGAGCCCGAGCAGTTCAGGCTG	CAGGAGGGCTCGGCAgacctggacgagcccgagcagttcaggctgGGATGCGGAGGGTCCGGCGGCCGCTCATCTCGTGCGACATCAAGCTATACTCTAA	543	552	Thrombospondin-related anonymous protein, TRAP	http://www.ncbi.nlm.nih.gov/protein/P16893.1	Thrombospondin-related anonymous protein, TRAP	http://www.uniprot.org/uniprot/Q76NM2	Plasmodium falciparum	http://purl.obolibrary.org/obo/NCBITaxon_5833	Plasmodium falciparum	http://purl.obolibrary.org/obo/NCBITaxon_5833	Data originally imported from the HLA Ligand Database and recurated.
9070	Linear peptide	DLERKVESL	GACCTGGAGAGGAAGGTGGAGAGCCTG	CAGGAGGGCTCGGCAgacctggagaggaaggtggagagcctgGGATGCGGAGGGTCCGGCGGCCGCTCATCTCGTGCGACATCAAGCTATACTCTAATAT	219	227	Vimentin	http://www.ncbi.nlm.nih.gov/protein/NP_003371.1	Vimentin	http://www.uniprot.org/uniprot/P08670	Homo sapiens	http://purl.obolibrary.org/obo/NCBITaxon_9606	Homo sapiens	http://purl.obolibrary.org/obo/NCBITaxon_9606
9114	Linear peptide	DLIAQPIRLL	GACCTGATCGCCCAGCCCATCAGGCTGCTG	CAGGAGGGCTCGGCAgacctgatcgcccagcccatcaggctgctgGGATGCGGAGGGTCCGGCGGCCGCTCATCTCGTGCGACATCAAGCTATACTCTAA			Genome polyprotein	https://ontology.iedb.org/ontology/ONTIE_0002561	Genome polyprotein	http://www.uniprot.org/uniprot/P27958	Hepatitis C virus subtype 1a	http://purl.obolibrary.org/obo/NCBITaxon_31646	Hepatitis C virus	http://purl.obolibrary.org/obo/NCBITaxon_11103
9162	Linear peptide	DLLEEGNTL	GACCTGCTGGAGGAGGGCAACACCCTG	CAGGAGGGCTCGGCAgacctgctggaggagggcaacaccctgGGATGCGGAGGGTCCGGCGGCCGCTCATCTCGTGCGACATCAAGCTATACTCTAATAT	111	119	Liver stage antigen 3	http://www.ncbi.nlm.nih.gov/protein/Q9U0P0	Liver stage antigen 3	http://www.uniprot.org/uniprot/O96275	Plasmodium falciparum	http://purl.obolibrary.org/obo/NCBITaxon_5833	Plasmodium falciparum	http://purl.obolibrary.org/obo/NCBITaxon_5833
9199	Linear peptide	DLMGYIPAV	GACCTGATGGGCTACATCCCCGCCGTG	CAGGAGGGCTCGGCAgacctgatgggctacatccccgccgtgGGATGCGGAGGGTCCGGCGGCCGCTCATCTCGTGCGACATCAAGCTATACTCTAATAT	16	24	Genome polyprotein	http://www.ncbi.nlm.nih.gov/protein/ABB77003.1	Genome polyprotein	http://www.uniprot.org/uniprot/P27958	Hepatitis C virus	http://purl.obolibrary.org/obo/NCBITaxon_11103	Hepatitis C virus	http://purl.obolibrary.org/obo/NCBITaxon_11103
9203	Linear peptide	DLMGYIPLV	GACCTGATGGGCTACATCCCCCTGGTG	CAGGAGGGCTCGGCAgacctgatgggctacatccccctggtgGGATGCGGAGGGTCCGGCGGCCGCTCATCTCGTGCGACATCAAGCTATACTCTAATAT	132	140	Genome polyprotein	http://www.ncbi.nlm.nih.gov/protein/P26664.3	Genome polyprotein	http://www.uniprot.org/uniprot/P27958	Hepatitis C virus (isolate 1)	http://purl.obolibrary.org/obo/NCBITaxon_11104	Hepatitis C virus	http://purl.obolibrary.org/obo/NCBITaxon_11103
9280	Linear peptide	DLSLRRFMV	GACCTGAGCCTGAGGAGGTTCATGGTG	CAGGAGGGCTCGGCAgacctgagcctgaggaggttcatggtgGGATGCGGAGGGTCCGGCGGCCGCTCATCTCGTGCGACATCAAGCTATACTCTAATAT	226	234	Nucleoprotein	http://www.ncbi.nlm.nih.gov/protein/P04851.1	Nucleoprotein	http://www.uniprot.org/uniprot/Q9WMB5	Measles virus strain Edmonston	http://purl.obolibrary.org/obo/NCBITaxon_11235	Measles morbillivirus	http://purl.obolibrary.org/obo/NCBITaxon_11234
9414	Linear peptide	DMWEHAFYL	GACATGTGGGAGCACGCCTTCTACCTG	CAGGAGGGCTCGGCAgacatgtgggagcacgccttctacctgGGATGCGGAGGGTCCGGCGGCCGCTCATCTCGTGCGACATCAAGCTATACTCTAATAT	160	168	Superoxide dismutase [Fe]	http://www.ncbi.nlm.nih.gov/protein/P17670.1	Superoxide dismutase [Fe]	http://www.uniprot.org/uniprot/P9WGE7	Mycobacterium tuberculosis	http://purl.obolibrary.org/obo/NCBITaxon_1773	Mycobacterium tuberculosis	http://purl.obolibrary.org/obo/NCBITaxon_1773
9415	Linear peptide	DMWEHAFYLQ	GACATGTGGGAGCACGCCTTCTACCTGCAG	CAGGAGGGCTCGGCAgacatgtgggagcacgccttctacctgcagGGATGCGGAGGGTCCGGCGGCCGCTCATCTCGTGCGACATCAAGCTATACTCTAA	160	169	Superoxide dismutase [Fe]	http://www.ncbi.nlm.nih.gov/protein/P17670.1	Superoxide dismutase [Fe]	http://www.uniprot.org/uniprot/P9WGE7	Mycobacterium tuberculosis	http://purl.obolibrary.org/obo/NCBITaxon_1773	Mycobacterium tuberculosis	http://purl.obolibrary.org/obo/NCBITaxon_1773
9507	Linear peptide	DNLMWYELS	GACAACCTGATGTGGTACGAGCTGAGC	CAGGAGGGCTCGGCAgacaacctgatgtggtacgagctgagcGGATGCGGAGGGTCCGGCGGCCGCTCATCTCGTGCGACATCAAGCTATACTCTAATAT	490	498	Envelope glycoprotein B	http://www.ncbi.nlm.nih.gov/protein/AAB62592.1	Envelope glycoprotein B	http://www.uniprot.org/uniprot/F5HB81	Human gammaherpesvirus 8	http://purl.obolibrary.org/obo/NCBITaxon_37296	Human gammaherpesvirus 8	http://purl.obolibrary.org/obo/NCBITaxon_37296
10448	Linear peptide	DTPLIPLTIF	GACACCCCCCTGATCCCCCTGACCATCTTC	CAGGAGGGCTCGGCAgacacccccctgatccccctgaccatcttcGGATGCGGAGGGTCCGGCGGCCGCTCATCTCGTGCGACATCAAGCTATACTCTAA	42	51	Epstein-Barr nuclear antigen 2	http://www.ncbi.nlm.nih.gov/protein/AAA45903.1	Epstein-Barr nuclear antigen 2	http://www.uniprot.org/uniprot/P12978	Human gammaherpesvirus 4	http://purl.obolibrary.org/obo/NCBITaxon_10376	Human gammaherpesvirus 4	http://purl.obolibrary.org/obo/NCBITaxon_10376
10736	Linear peptide	DVSRPTAVV	GACGTGAGCAGGCCCACCGCCGTGGTG	CAGGAGGGCTCGGCAgacgtgagcaggcccaccgccgtggtgGGATGCGGAGGGTCCGGCGGCCGCTCATCTCGTGCGACATCAAGCTATACTCTAATAT	121	129	Trans-sialidase, putative (UniProt:K4DVF7)	http://www.ncbi.nlm.nih.gov/protein/EAN81657.1	Trans-sialidase, putative	http://www.uniprot.org/uniprot/K4DVF7	Trypanosoma cruzi	http://purl.obolibrary.org/obo/NCBITaxon_5693	Trypanosoma cruzi	http://purl.obolibrary.org/obo/NCBITaxon_5693
10987	Linear peptide	EAAGIGILTV	GAGGCCGCCGGCATCGGCATCCTGACCGTG	CAGGAGGGCTCGGCAgaggccgccggcatcggcatcctgaccgtgGGATGCGGAGGGTCCGGCGGCCGCTCATCTCGTGCGACATCAAGCTATACTCTAA	26	35	Melanoma antigen recognized by T-cells 1	http://www.ncbi.nlm.nih.gov/protein/Q16655.1	Melanoma antigen recognized by T-cells 1	http://www.uniprot.org/uniprot/Q16655	Homo sapiens	http://purl.obolibrary.org/obo/NCBITaxon_9606	Homo sapiens	http://purl.obolibrary.org/obo/NCBITaxon_9606
12941	Linear peptide	ELAGIGILTV	GAGCTGGCCGGCATCGGCATCCTGACCGTG	CAGGAGGGCTCGGCAgagctggccggcatcggcatcctgaccgtgGGATGCGGAGGGTCCGGCGGCCGCTCATCTCGTGCGACATCAAGCTATACTCTAA	26	35	Melanoma antigen recognized by T-cells 1	http://www.ncbi.nlm.nih.gov/protein/Q16655.1	Melanoma antigen recognized by T-cells 1	http://www.uniprot.org/uniprot/Q16655	Homo sapiens	http://purl.obolibrary.org/obo/NCBITaxon_9606	Homo sapiens	http://purl.obolibrary.org/obo/NCBITaxon_9606		analog
13091	Linear peptide	ELIEANLLW	GAGCTGATCGAGGCCAACCTGCTGTGG	CAGGAGGGCTCGGCAgagctgatcgaggccaacctgctgtggGGATGCGGAGGGTCCGGCGGCCGCTCATCTCGTGCGACATCAAGCTATACTCTAATAT	2225	2233	Genome polyprotein	http://www.ncbi.nlm.nih.gov/protein/BAA01582.1	Genome polyprotein	http://www.uniprot.org/uniprot/P27958	Hepatitis C virus	http://purl.obolibrary.org/obo/NCBITaxon_11103	Hepatitis C virus	http://purl.obolibrary.org/obo/NCBITaxon_11103
13165	Linear peptide	ELLRPTTLV	GAGCTGCTGAGGCCCACCACCCTGGTG	CAGGAGGGCTCGGCAgagctgctgaggcccaccaccctggtgGGATGCGGAGGGTCCGGCGGCCGCTCATCTCGTGCGACATCAAGCTATACTCTAATAT	170	178	Trans-sialidase, putative (UniProt:K4DSG3)	http://www.ncbi.nlm.nih.gov/protein/XP_820184.1	Trans-sialidase, putative	http://www.uniprot.org/uniprot/K4DSG3	Trypanosoma cruzi	http://purl.obolibrary.org/obo/NCBITaxon_5693	Trypanosoma cruzi	http://purl.obolibrary.org/obo/NCBITaxon_5693
13181	Linear peptide	ELMTLATWV	GAGCTGATGACCCTGGCCACCTGGGTG	CAGGAGGGCTCGGCAgagctgatgaccctggccacctgggtgGGATGCGGAGGGTCCGGCGGCCGCTCATCTCGTGCGACATCAAGCTATACTCTAATAT	64	72	Capsid protein	http://www.ncbi.nlm.nih.gov/protein/CAL29866.1	Capsid protein	http://www.uniprot.org/uniprot/Q76R61	Hepatitis B virus	http://purl.obolibrary.org/obo/NCBITaxon_10407	Hepatitis B virus	http://purl.obolibrary.org/obo/NCBITaxon_10407
13389	Linear peptide	EMKYALINL	GAGATGAAGTACGCCCTGATCAACCTG	CAGGAGGGCTCGGCAgagatgaagtacgccctgatcaacctgGGATGCGGAGGGTCCGGCGGCCGCTCATCTCGTGCGACATCAAGCTATACTCTAATAT	161	169	Assembly protein G7	http://www.ncbi.nlm.nih.gov/protein/AAO89364.1	Assembly protein G7	http://www.uniprot.org/uniprot/P68716	Vaccinia virus WR	http://purl.obolibrary.org/obo/NCBITaxon_10254	Vaccinia virus	http://purl.obolibrary.org/obo/NCBITaxon_10245
13410	Linear peptide	EMQLKIDKL	GAGATGCAGCTGAAGATCGACAAGCTG	CAGGAGGGCTCGGCAgagatgcagctgaagatcgacaagctgGGATGCGGAGGGTCCGGCGGCCGCTCATCTCGTGCGACATCAAGCTATACTCTAATAT	124	132	Putative nuclease G5	http://www.ncbi.nlm.nih.gov/protein/AAO89361.1	Putative nuclease G5	http://www.uniprot.org/uniprot/Q80HX0	Vaccinia virus WR	http://purl.obolibrary.org/obo/NCBITaxon_10254	Vaccinia virus	http://purl.obolibrary.org/obo/NCBITaxon_10245
14198	Linear peptide	ESLKTFEQVTE	GAGAGCCTGAAGACCTTCGAGCAGGTGACCGAG	CAGGAGGGCTCGGCAgagagcctgaagaccttcgagcaggtgaccgagGGATGCGGAGGGTCCGGCGGCCGCTCATCTCGTGCGACATCAAGCTATACTC	61	71	55 kDa immediate-early protein 1	http://www.ncbi.nlm.nih.gov/protein/AAR31390.1	55 kDa immediate-early protein 1	http://www.uniprot.org/uniprot/F5HCM1	Human betaherpesvirus 5	http://purl.obolibrary.org/obo/NCBITaxon_10359	Human betaherpesvirus 5	http://purl.obolibrary.org/obo/NCBITaxon_10359
14381	Linear peptide	ETFWAKHMW	GAGACCTTCTGGGCCAAGCACATGTGG	CAGGAGGGCTCGGCAgagaccttctgggccaagcacatgtggGGATGCGGAGGGTCCGGCGGCCGCTCATCTCGTGCGACATCAAGCTATACTCTAATAT	1758	1766	Genome polyprotein	http://www.ncbi.nlm.nih.gov/protein/BAA25076.1	Genome polyprotein	http://www.uniprot.org/uniprot/P27958	Hepatitis C virus	http://purl.obolibrary.org/obo/NCBITaxon_11103	Hepatitis C virus	http://purl.obolibrary.org/obo/NCBITaxon_11103
14720	Linear peptide	EVIAPAVQTNW	GAGGTGATCGCCCCCGCCGTGCAGACCAACTGG	CAGGAGGGCTCGGCAgaggtgatcgcccccgccgtgcagaccaactggGGATGCGGAGGGTCCGGCGGCCGCTCATCTCGTGCGACATCAAGCTATACTC	1744	1754	Genome polyprotein	http://www.ncbi.nlm.nih.gov/protein/P26664.3	Genome polyprotein	http://www.uniprot.org/uniprot/P27958	Hepatitis C virus	http://purl.obolibrary.org/obo/NCBITaxon_11103	Hepatitis C virus	http://purl.obolibrary.org/obo/NCBITaxon_11103
14744	Linear peptide	EVKEKHEFL	GAGGTGAAGGAGAAGCACGAGTTCCTG	CAGGAGGGCTCGGCAgaggtgaaggagaagcacgagttcctgGGATGCGGAGGGTCCGGCGGCCGCTCATCTCGTGCGACATCAAGCTATACTCTAATAT	1137	1145	Genome polyprotein	http://www.ncbi.nlm.nih.gov/protein/Q86887.3	Genome polyprotein	http://www.uniprot.org/uniprot/P08292	Coxsackievirus B4 (strain E2)	http://purl.obolibrary.org/obo/NCBITaxon_103905	Enterovirus B	http://purl.obolibrary.org/obo/NCBITaxon_138949
15173	Linear peptide	FAFRDLCIV	TTCGCCTTCAGGGACCTGTGCATCGTG	CAGGAGGGCTCGGCAttcgccttcagggacctgtgcatcgtgGGATGCGGAGGGTCCGGCGGCCGCTCATCTCGTGCGACATCAAGCTATACTCTAATAT	52	60	Protein E6	http://www.ncbi.nlm.nih.gov/protein/P03126.1	Protein E6	http://www.uniprot.org/uniprot/P03126	Human papillomavirus type 16	http://purl.obolibrary.org/obo/NCBITaxon_333760	Alphapapillomavirus 9	http://purl.obolibrary.org/obo/NCBITaxon_337041
15226	Linear peptide	FANCNFTLV	TTCGCCAACTGCAACTTCACCCTGGTG	CAGGAGGGCTCGGCAttcgccaactgcaacttcaccctggtgGGATGCGGAGGGTCCGGCGGCCGCTCATCTCGTGCGACATCAAGCTATACTCTAATAT	570	578	Trans-sialidase, putative (UniProt:K4DSQ4)	http://www.ncbi.nlm.nih.gov/protein/XP_810383.1	Trans-sialidase, putative	http://www.uniprot.org/uniprot/K4DSQ4	Trypanosoma cruzi	http://purl.obolibrary.org/obo/NCBITaxon_5693	Trypanosoma cruzi	http://purl.obolibrary.org/obo/NCBITaxon_5693
15230	Linear peptide	FANHDFTLV	TTCGCCAACCACGACTTCACCCTGGTG	CAGGAGGGCTCGGCAttcgccaaccacgacttcaccctggtgGGATGCGGAGGGTCCGGCGGCCGCTCATCTCGTGCGACATCAAGCTATACTCTAATAT			Other Trypanosoma cruzi protein	https://ontology.iedb.org/ontology/ONTIE_0002050			Trypanosoma cruzi	http://purl.obolibrary.org/obo/NCBITaxon_5693	Trypanosoma cruzi	http://purl.obolibrary.org/obo/NCBITaxon_5693	The epitope sequence was presumably derived from the nucleotide sequence of a Trans-sialidase pseudogene.
15231	Linear peptide	FANHKFTLV	TTCGCCAACCACAAGTTCACCCTGGTG	CAGGAGGGCTCGGCAttcgccaaccacaagttcaccctggtgGGATGCGGAGGGTCCGGCGGCCGCTCATCTCGTGCGACATCAAGCTATACTCTAATAT	628	636	Trans-sialidase, putative (UniProt:K4DSG6)	http://www.ncbi.nlm.nih.gov/protein/XP_817875.1	Trans-sialidase, putative	http://www.uniprot.org/uniprot/K4DSG6	Trypanosoma cruzi	http://purl.obolibrary.org/obo/NCBITaxon_5693	Trypanosoma cruzi	http://purl.obolibrary.org/obo/NCBITaxon_5693
15232	Linear peptide	FANHNFTLV	TTCGCCAACCACAACTTCACCCTGGTG	CAGGAGGGCTCGGCAttcgccaaccacaacttcaccctggtgGGATGCGGAGGGTCCGGCGGCCGCTCATCTCGTGCGACATCAAGCTATACTCTAATAT	579	587	Trans-sialidase, putative (UniProt:K4DSJ0)	http://www.ncbi.nlm.nih.gov/protein/XP_821438.1	Trans-sialidase, putative	http://www.uniprot.org/uniprot/K4DSJ0	Trypanosoma cruzi	http://purl.obolibrary.org/obo/NCBITaxon_5693	Trypanosoma cruzi	http://purl.obolibrary.org/obo/NCBITaxon_5693
15233	Linear peptide	FANNEFTLV	TTCGCCAACAACGAGTTCACCCTGGTG	CAGGAGGGCTCGGCAttcgccaacaacgagttcaccctggtgGGATGCGGAGGGTCCGGCGGCCGCTCATCTCGTGCGACATCAAGCTATACTCTAATAT	265	273	Trans-sialidase, putative (UniProt:K4DLA4)	http://www.ncbi.nlm.nih.gov/protein/EAN81456.1	Trans-sialidase, putative	http://www.uniprot.org/uniprot/K4DLA4	Trypanosoma cruzi	http://purl.obolibrary.org/obo/NCBITaxon_5693	Trypanosoma cruzi	http://purl.obolibrary.org/obo/NCBITaxon_5693
15234	Linear peptide	FANNKFTLV	TTCGCCAACAACAAGTTCACCCTGGTG	CAGGAGGGCTCGGCAttcgccaacaacaagttcaccctggtgGGATGCGGAGGGTCCGGCGGCCGCTCATCTCGTGCGACATCAAGCTATACTCTAATAT	179	187	Trans-sialidase, putative (UniProt:K4DLA4)	http://www.ncbi.nlm.nih.gov/protein/EAN80946.1	Trans-sialidase, putative	http://www.uniprot.org/uniprot/K4DLA4	Trypanosoma cruzi	http://purl.obolibrary.org/obo/NCBITaxon_5693	Trypanosoma cruzi	http://purl.obolibrary.org/obo/NCBITaxon_5693
15242	Linear peptide	FANYKFTLV	TTCGCCAACTACAAGTTCACCCTGGTG	CAGGAGGGCTCGGCAttcgccaactacaagttcaccctggtgGGATGCGGAGGGTCCGGCGGCCGCTCATCTCGTGCGACATCAAGCTATACTCTAATAT	379	387	Trans-sialidase, putative (UniProt:K4DMA7)	http://www.ncbi.nlm.nih.gov/protein/EAN81560.1	Trans-sialidase, putative	http://www.uniprot.org/uniprot/K4DMA7	Trypanosoma cruzi	http://purl.obolibrary.org/obo/NCBITaxon_5693	Trypanosoma cruzi	http://purl.obolibrary.org/obo/NCBITaxon_5693
15244	Linear peptide	FANYNFTLV	TTCGCCAACTACAACTTCACCCTGGTG	CAGGAGGGCTCGGCAttcgccaactacaacttcaccctggtgGGATGCGGAGGGTCCGGCGGCCGCTCATCTCGTGCGACATCAAGCTATACTCTAATAT	581	589	Trans-sialidase, putative (UniProt:K4DVH9)	http://www.ncbi.nlm.nih.gov/protein/XP_818893.1	Trans-sialidase, putative	http://www.uniprot.org/uniprot/K4DVH9	Trypanosoma cruzi	http://purl.obolibrary.org/obo/NCBITaxon_5693	Trypanosoma cruzi	http://purl.obolibrary.org/obo/NCBITaxon_5693
16156	Linear peptide	FIAGLIAIV	TTCATCGCCGGCCTGATCGCCATCGTG	CAGGAGGGCTCGGCAttcatcgccggcctgatcgccatcgtgGGATGCGGAGGGTCCGGCGGCCGCTCATCTCGTGCGACATCAAGCTATACTCTAATAT	1202	1210	Spike glycoprotein	http://www.ncbi.nlm.nih.gov/protein/P59594.1	Spike glycoprotein	http://www.uniprot.org/uniprot/P59594	SARS coronavirus	http://purl.obolibrary.org/obo/NCBITaxon_227859	SARS-related coronavirus	http://purl.obolibrary.org/obo/NCBITaxon_694009
16158	Linear peptide	FIAGNSAYEYV	TTCATCGCCGGCAACAGCGCCTACGAGTACGTG	CAGGAGGGCTCGGCAttcatcgccggcaacagcgcctacgagtacgtgGGATGCGGAGGGTCCGGCGGCCGCTCATCTCGTGCGACATCAAGCTATACTC	619	629	Envelope glycoprotein B	http://www.ncbi.nlm.nih.gov/protein/ABQ23592.1	Envelope glycoprotein B	http://www.uniprot.org/uniprot/F5HB53	Human betaherpesvirus 5	http://purl.obolibrary.org/obo/NCBITaxon_10359	Human betaherpesvirus 5	http://purl.obolibrary.org/obo/NCBITaxon_10359	The following refers to the epitope id as found in the original FIMM database: P000034
16241	Linear peptide	FILGIIITV	TTCATCCTGGGCATCATCATCACCGTG	CAGGAGGGCTCGGCAttcatcctgggcatcatcatcaccgtgGGATGCGGAGGGTCCGGCGGCCGCTCATCTCGTGCGACATCAAGCTATACTCTAATAT	51	59	Virion membrane protein A14	http://www.ncbi.nlm.nih.gov/protein/Q76ZQ3.1	Virion membrane protein A14	http://www.uniprot.org/uniprot/Q76ZQ3	Vaccinia virus	http://purl.obolibrary.org/obo/NCBITaxon_10245	Vaccinia virus	http://purl.obolibrary.org/obo/NCBITaxon_10245
16267	Linear peptide	FIPENQRTV	TTCATCCCCGAGAACCAGAGGACCGTG	CAGGAGGGCTCGGCAttcatccccgagaaccagaggaccgtgGGATGCGGAGGGTCCGGCGGCCGCTCATCTCGTGCGACATCAAGCTATACTCTAATAT	248	256	Envelope glycoprotein D	http://www.ncbi.nlm.nih.gov/protein/Q69091.1	Envelope glycoprotein D	http://www.uniprot.org/uniprot/Q69091	Herpes simplex virus (type 1 / strain 17)	http://purl.obolibrary.org/obo/NCBITaxon_10299	Human alphaherpesvirus 1	http://purl.obolibrary.org/obo/NCBITaxon_10298
16326	Linear peptide	FIVPLTDLRIPS	TTCATCGTGCCCCTGACCGACCTGAGGATCCCCAGC	CAGGAGGGCTCGGCAttcatcgtgcccctgaccgacctgaggatccccagcGGATGCGGAGGGTCCGGCGGCCGCTCATCTCGTGCGACATCAAGCTATA	2617	2628	Apolipoprotein B-100	http://www.ncbi.nlm.nih.gov/protein/P04114.2	Apolipoprotein B-100	http://www.uniprot.org/uniprot/P04114	Homo sapiens	http://purl.obolibrary.org/obo/NCBITaxon_9606	Homo sapiens	http://purl.obolibrary.org/obo/NCBITaxon_9606
16332	Linear peptide	FIYAGSLSA	TTCATCTACGCCGGCAGCCTGAGCGCC	CAGGAGGGCTCGGCAttcatctacgccggcagcctgagcgccGGATGCGGAGGGTCCGGCGGCCGCTCATCTCGTGCGACATCAAGCTATACTCTAATAT	183	191	Diacylglycerol acyltransferase/mycolyltransferase Ag85B	http://www.ncbi.nlm.nih.gov/protein/P31952	Diacylglycerol acyltransferase/mycolyltransferase Ag85B	http://www.uniprot.org/uniprot/P9WQP1	Mycobacterium tuberculosis	http://purl.obolibrary.org/obo/NCBITaxon_1773	Mycobacterium tuberculosis	http://purl.obolibrary.org/obo/NCBITaxon_1773
16548	Linear peptide	FLDKGTYTL	TTCCTGGACAAGGGCACCTACACCCTG	CAGGAGGGCTCGGCAttcctggacaagggcacctacaccctgGGATGCGGAGGGTCCGGCGGCCGCTCATCTCGTGCGACATCAAGCTATACTCTAATAT	276	284	Envelope glycoprotein B	http://www.ncbi.nlm.nih.gov/protein/YP_401713.1	Envelope glycoprotein B	http://www.uniprot.org/uniprot/P03188	Human gammaherpesvirus 4	http://purl.obolibrary.org/obo/NCBITaxon_10376	Human gammaherpesvirus 4	http://purl.obolibrary.org/obo/NCBITaxon_10376
16581	Linear peptide	FLEQQNKIL	TTCCTGGAGCAGCAGAACAAGATCCTG	CAGGAGGGCTCGGCAttcctggagcagcagaacaagatcctgGGATGCGGAGGGTCCGGCGGCCGCTCATCTCGTGCGACATCAAGCTATACTCTAATAT	11	19	Vimentin	http://www.ncbi.nlm.nih.gov/protein/AAA61281.2	Vimentin	http://www.uniprot.org/uniprot/P08670	Homo sapiens	http://purl.obolibrary.org/obo/NCBITaxon_9606	Homo sapiens	http://purl.obolibrary.org/obo/NCBITaxon_9606
16582	Linear peptide	FLEQQNKILL	TTCCTGGAGCAGCAGAACAAGATCCTGCTG	CAGGAGGGCTCGGCAttcctggagcagcagaacaagatcctgctgGGATGCGGAGGGTCCGGCGGCCGCTCATCTCGTGCGACATCAAGCTATACTCTAA	23	32	Vimentin	http://www.ncbi.nlm.nih.gov/protein/3G1E_A	Vimentin	http://www.uniprot.org/uniprot/P08670	Homo sapiens	http://purl.obolibrary.org/obo/NCBITaxon_9606	Homo sapiens	http://purl.obolibrary.org/obo/NCBITaxon_9606
16586	Linear peptide	FLFDGSPTYV	TTCCTGTTCGACGGCAGCCCCACCTACGTG	CAGGAGGGCTCGGCAttcctgttcgacggcagccccacctacgtgGGATGCGGAGGGTCCGGCGGCCGCTCATCTCGTGCGACATCAAGCTATACTCTAA	2333	2342	Fatty acid synthase	http://www.ncbi.nlm.nih.gov/protein/AAA73576.1	Fatty acid synthase	http://www.uniprot.org/uniprot/P49327	Homo sapiens	http://purl.obolibrary.org/obo/NCBITaxon_9606	Homo sapiens	http://purl.obolibrary.org/obo/NCBITaxon_9606
16587	Linear peptide	FLFDGSPTYVL	TTCCTGTTCGACGGCAGCCCCACCTACGTGCTG	CAGGAGGGCTCGGCAttcctgttcgacggcagccccacctacgtgctgGGATGCGGAGGGTCCGGCGGCCGCTCATCTCGTGCGACATCAAGCTATACTC	2335	2345	Fatty acid synthase	http://www.ncbi.nlm.nih.gov/protein/NP_004095.4	Fatty acid synthase	http://www.uniprot.org/uniprot/P49327	Homo sapiens	http://purl.obolibrary.org/obo/NCBITaxon_9606	Homo sapiens	http://purl.obolibrary.org/obo/NCBITaxon_9606
16597	Linear peptide	FLFLRNFSL	TTCCTGTTCCTGAGGAACTTCAGCCTG	CAGGAGGGCTCGGCAttcctgttcctgaggaacttcagcctgGGATGCGGAGGGTCCGGCGGCCGCTCATCTCGTGCGACATCAAGCTATACTCTAATAT	27	35	TCR gamma alternate reading frame protein isoform 1	http://www.ncbi.nlm.nih.gov/protein/NP_001003799.1			Homo sapiens	http://purl.obolibrary.org/obo/NCBITaxon_9606	Homo sapiens	http://purl.obolibrary.org/obo/NCBITaxon_9606		analog
16623	Linear peptide	FLGKIWPSYK	TTCCTGGGCAAGATCTGGCCCAGCTACAAG	CAGGAGGGCTCGGCAttcctgggcaagatctggcccagctacaagGGATGCGGAGGGTCCGGCGGCCGCTCATCTCGTGCGACATCAAGCTATACTCTAA	432	441	Gag polyprotein	http://www.ncbi.nlm.nih.gov/protein/AAV53308.1	Gag polyprotein	http://www.uniprot.org/uniprot/P04591	Human immunodeficiency virus 1	http://purl.obolibrary.org/obo/NCBITaxon_11676	Human immunodeficiency virus 1	http://purl.obolibrary.org/obo/NCBITaxon_11676
16626	Linear peptide	FLGMESCGI	TTCCTGGGCATGGAGAGCTGCGGCATC	CAGGAGGGCTCGGCAttcctgggcatggagagctgcggcatcGGATGCGGAGGGTCCGGCGGCCGCTCATCTCGTGCGACATCAAGCTATACTCTAATAT	266	274	Actin, cytoplasmic 1	http://www.ncbi.nlm.nih.gov/protein/P02570	Actin, cytoplasmic 1	http://www.uniprot.org/uniprot/P60709	Homo sapiens	http://purl.obolibrary.org/obo/NCBITaxon_9606	Homo sapiens	http://purl.obolibrary.org/obo/NCBITaxon_9606
16637	Linear peptide	FLHCIVFNV	TTCCTGCACTGCATCGTGTTCAACGTG	CAGGAGGGCTCGGCAttcctgcactgcatcgtgttcaacgtgGGATGCGGAGGGTCCGGCGGCCGCTCATCTCGTGCGACATCAAGCTATACTCTAATAT	410	418	Human polyomavirus 1 protein	http://www.ncbi.nlm.nih.gov/protein/AAT47414.1			Human polyomavirus 1	http://purl.obolibrary.org/obo/NCBITaxon_1891762	Human polyomavirus 1	http://purl.obolibrary.org/obo/NCBITaxon_1891762
16645	Linear peptide	FLHTTFIDV	TTCCTGCACACCACCTTCATCGACGTG	CAGGAGGGCTCGGCAttcctgcacaccaccttcatcgacgtgGGATGCGGAGGGTCCGGCGGCCGCTCATCTCGTGCGACATCAAGCTATACTCTAATAT	292	300	Serine proteinase inhibitor 1	http://www.ncbi.nlm.nih.gov/protein/AAO89484.1	Serine proteinase inhibitor 1	http://www.uniprot.org/uniprot/P15058	Vaccinia virus WR	http://purl.obolibrary.org/obo/NCBITaxon_10254	Vaccinia virus	http://purl.obolibrary.org/obo/NCBITaxon_10245
16652	Linear peptide	FLIFFDLFLV	TTCCTGATCTTCTTCGACCTGTTCCTGGTG	CAGGAGGGCTCGGCAttcctgatcttcttcgacctgttcctggtgGGATGCGGAGGGTCCGGCGGCCGCTCATCTCGTGCGACATCAAGCTATACTCTAA	14	23	Thrombospondin-related anonymous protein, TRAP	http://www.ncbi.nlm.nih.gov/protein/NP_705260.1	Thrombospondin-related anonymous protein, TRAP	http://www.uniprot.org/uniprot/Q76NM2	Plasmodium falciparum 3D7	http://purl.obolibrary.org/obo/NCBITaxon_36329	Plasmodium falciparum	http://purl.obolibrary.org/obo/NCBITaxon_5833	Imported from the TopBank database (internal database of LIAI) and recurated.
16706	Linear peptide	FLLALLSCL	TTCCTGCTGGCCCTGCTGAGCTGCCTG	CAGGAGGGCTCGGCAttcctgctggccctgctgagctgcctgGGATGCGGAGGGTCCGGCGGCCGCTCATCTCGTGCGACATCAAGCTATACTCTAATAT	177	185	Genome polyprotein	http://www.ncbi.nlm.nih.gov/protein/BAA00705.1	Genome polyprotein	http://www.uniprot.org/uniprot/P27958	Hepatitis C virus	http://purl.obolibrary.org/obo/NCBITaxon_11103	Hepatitis C virus	http://purl.obolibrary.org/obo/NCBITaxon_11103
16725	Linear peptide	FLLLADARV	TTCCTGCTGCTGGCCGACGCCAGGGTG	CAGGAGGGCTCGGCAttcctgctgctggccgacgccagggtgGGATGCGGAGGGTCCGGCGGCCGCTCATCTCGTGCGACATCAAGCTATACTCTAATAT	723	731	Genome polyprotein	http://www.ncbi.nlm.nih.gov/protein/P26663.3	Genome polyprotein	http://www.uniprot.org/uniprot/P27958	Hepatitis C virus	http://purl.obolibrary.org/obo/NCBITaxon_11103	Hepatitis C virus	http://purl.obolibrary.org/obo/NCBITaxon_11103	Imported from the TopBank database.
16751	Linear peptide	FLLSLGIHL	TTCCTGCTGAGCCTGGGCATCCACCTG	CAGGAGGGCTCGGCAttcctgctgagcctgggcatccacctgGGATGCGGAGGGTCCGGCGGCCGCTCATCTCGTGCGACATCAAGCTATACTCTAATAT	575	583	Protein P	http://www.ncbi.nlm.nih.gov/protein/P03159.1	Protein P	http://www.uniprot.org/uniprot/Q69028	Hepatitis B virus	http://purl.obolibrary.org/obo/NCBITaxon_10407	Hepatitis B virus	http://purl.obolibrary.org/obo/NCBITaxon_10407
16753	Linear peptide	FLLTKILTI	TTCCTGCTGACCAAGATCCTGACCATC	CAGGAGGGCTCGGCAttcctgctgaccaagatcctgaccatcGGATGCGGAGGGTCCGGCGGCCGCTCATCTCGTGCGACATCAAGCTATACTCTAATAT	239	247	Large envelope protein	http://www.ncbi.nlm.nih.gov/protein/CAB38230.1	Large envelope protein	http://www.uniprot.org/uniprot/Q76R62	Hepatitis B virus	http://purl.obolibrary.org/obo/NCBITaxon_10407	Hepatitis B virus	http://purl.obolibrary.org/obo/NCBITaxon_10407
16755	Linear peptide	FLLTRILTI	TTCCTGCTGACCAGGATCCTGACCATC	CAGGAGGGCTCGGCAttcctgctgaccaggatcctgaccatcGGATGCGGAGGGTCCGGCGGCCGCTCATCTCGTGCGACATCAAGCTATACTCTAATAT	183	191	Large envelope protein	http://www.ncbi.nlm.nih.gov/protein/BAF48755.1	Large envelope protein	http://www.uniprot.org/uniprot/Q76R62	Hepatitis B virus	http://purl.obolibrary.org/obo/NCBITaxon_10407	Hepatitis B virus	http://purl.obolibrary.org/obo/NCBITaxon_10407
16772	Linear peptide	FLMPFMHYIV	TTCCTGATGCCCTTCATGCACTACATCGTG	CAGGAGGGCTCGGCAttcctgatgcccttcatgcactacatcgtgGGATGCGGAGGGTCCGGCGGCCGCTCATCTCGTGCGACATCAAGCTATACTCTAA	29	38	O-Antigen ligase family protein	http://www.ncbi.nlm.nih.gov/protein/YP_169902.1	O-Antigen ligase family protein	http://www.uniprot.org/uniprot/Q5NGE0	Francisella tularensis subsp. tularensis SCHU S4	http://purl.obolibrary.org/obo/NCBITaxon_177416	Francisella tularensis	http://purl.obolibrary.org/obo/NCBITaxon_263
16781	Linear peptide	FLNISWFYI	TTCCTGAACATCAGCTGGTTCTACATC	CAGGAGGGCTCGGCAttcctgaacatcagctggttctacatcGGATGCGGAGGGTCCGGCGGCCGCTCATCTCGTGCGACATCAAGCTATACTCTAATAT	107	115	DNA polymerase	http://www.ncbi.nlm.nih.gov/protein/P06856.4	DNA polymerase	http://www.uniprot.org/uniprot/P06856	Vaccinia virus	http://purl.obolibrary.org/obo/NCBITaxon_10245	Vaccinia virus	http://purl.obolibrary.org/obo/NCBITaxon_10245
16795	Linear peptide	FLPADFFPSI	TTCCTGCCCGCCGACTTCTTCCCCAGCATC	CAGGAGGGCTCGGCAttcctgcccgccgacttcttccccagcatcGGATGCGGAGGGTCCGGCGGCCGCTCATCTCGTGCGACATCAAGCTATACTCTAA	47	56	External core antigen	http://www.ncbi.nlm.nih.gov/protein/AAP57273.1	External core antigen	http://www.uniprot.org/uniprot/P0C767	Hepatitis B virus	http://purl.obolibrary.org/obo/NCBITaxon_10407	Hepatitis B virus	http://purl.obolibrary.org/obo/NCBITaxon_10407
16796	Linear peptide	FLPADFFPSV	TTCCTGCCCGCCGACTTCTTCCCCAGCGTG	CAGGAGGGCTCGGCAttcctgcccgccgacttcttccccagcgtgGGATGCGGAGGGTCCGGCGGCCGCTCATCTCGTGCGACATCAAGCTATACTCTAA	18	27	Capsid protein	http://www.ncbi.nlm.nih.gov/protein/ABE97049.1	Capsid protein	http://www.uniprot.org/uniprot/Q76R61	Hepatitis B virus	http://purl.obolibrary.org/obo/NCBITaxon_10407	Hepatitis B virus	http://purl.obolibrary.org/obo/NCBITaxon_10407
16813	Linear peptide	FLPNDFFPSA	TTCCTGCCCAACGACTTCTTCCCCAGCGCC	CAGGAGGGCTCGGCAttcctgcccaacgacttcttccccagcgccGGATGCGGAGGGTCCGGCGGCCGCTCATCTCGTGCGACATCAAGCTATACTCTAA			External core antigen	https://ontology.iedb.org/ontology/ONTIE_0002581	External core antigen	http://www.uniprot.org/uniprot/P0C767	Hepatitis B virus	http://purl.obolibrary.org/obo/NCBITaxon_10407	Hepatitis B virus	http://purl.obolibrary.org/obo/NCBITaxon_10407
16814	Linear peptide	FLPNDFFPSV	TTCCTGCCCAACGACTTCTTCCCCAGCGTG	CAGGAGGGCTCGGCAttcctgcccaacgacttcttccccagcgtgGGATGCGGAGGGTCCGGCGGCCGCTCATCTCGTGCGACATCAAGCTATACTCTAA	47	56	External core antigen	http://www.ncbi.nlm.nih.gov/protein/CAM58990.1	External core antigen	http://www.uniprot.org/uniprot/P0C767	Hepatitis B virus	http://purl.obolibrary.org/obo/NCBITaxon_10407	Hepatitis B virus	http://purl.obolibrary.org/obo/NCBITaxon_10407	Imported from the TopBank database. This is a variable region, as determined from sequencing of viruses from clinical isolates.
16815	Linear peptide	FLPPDFFPSV	TTCCTGCCCCCCGACTTCTTCCCCAGCGTG	CAGGAGGGCTCGGCAttcctgccccccgacttcttccccagcgtgGGATGCGGAGGGTCCGGCGGCCGCTCATCTCGTGCGACATCAAGCTATACTCTAA	18	27	Capsid protein	http://www.ncbi.nlm.nih.gov/protein/AAR19324.1	Capsid protein	http://www.uniprot.org/uniprot/Q76R61	Hepatitis B virus	http://purl.obolibrary.org/obo/NCBITaxon_10407	Hepatitis B virus	http://purl.obolibrary.org/obo/NCBITaxon_10407	This epitope is a mutant of the core 18-27 peptide of HBV which was identified in infected patients.
16827	Linear peptide	FLPSDFFPGV	TTCCTGCCCAGCGACTTCTTCCCCGGCGTG	CAGGAGGGCTCGGCAttcctgcccagcgacttcttccccggcgtgGGATGCGGAGGGTCCGGCGGCCGCTCATCTCGTGCGACATCAAGCTATACTCTAA			External core antigen	https://ontology.iedb.org/ontology/ONTIE_0002581	External core antigen	http://www.uniprot.org/uniprot/P0C767	Hepatitis B virus	http://purl.obolibrary.org/obo/NCBITaxon_10407	Hepatitis B virus	http://purl.obolibrary.org/obo/NCBITaxon_10407	This epitope is a mutant of the core 18-27 peptide of HBV which was identified in infected patients.
16830	Linear peptide	FLPSDFFPS	TTCCTGCCCAGCGACTTCTTCCCCAGC	CAGGAGGGCTCGGCAttcctgcccagcgacttcttccccagcGGATGCGGAGGGTCCGGCGGCCGCTCATCTCGTGCGACATCAAGCTATACTCTAATAT	18	26	Capsid protein	http://www.ncbi.nlm.nih.gov/protein/NP_647607.1	Capsid protein	http://www.uniprot.org/uniprot/Q76R61	Hepatitis B virus	http://purl.obolibrary.org/obo/NCBITaxon_10407	Hepatitis B virus	http://purl.obolibrary.org/obo/NCBITaxon_10407
16831	Linear peptide	FLPSDFFPSA	TTCCTGCCCAGCGACTTCTTCCCCAGCGCC	CAGGAGGGCTCGGCAttcctgcccagcgacttcttccccagcgccGGATGCGGAGGGTCCGGCGGCCGCTCATCTCGTGCGACATCAAGCTATACTCTAA			External core antigen	https://ontology.iedb.org/ontology/ONTIE_0002581	External core antigen	http://www.uniprot.org/uniprot/P0C767	Hepatitis B virus	http://purl.obolibrary.org/obo/NCBITaxon_10407	Hepatitis B virus	http://purl.obolibrary.org/obo/NCBITaxon_10407
16832	Linear peptide	FLPSDFFPSI	TTCCTGCCCAGCGACTTCTTCCCCAGCATC	CAGGAGGGCTCGGCAttcctgcccagcgacttcttccccagcatcGGATGCGGAGGGTCCGGCGGCCGCTCATCTCGTGCGACATCAAGCTATACTCTAA	18	27	Capsid protein	http://www.ncbi.nlm.nih.gov/protein/BAF42671.1	Capsid protein	http://www.uniprot.org/uniprot/Q76R61	Hepatitis B virus	http://purl.obolibrary.org/obo/NCBITaxon_10407	Hepatitis B virus	http://purl.obolibrary.org/obo/NCBITaxon_10407
16833	Linear peptide	FLPSDFFPSV	TTCCTGCCCAGCGACTTCTTCCCCAGCGTG	CAGGAGGGCTCGGCAttcctgcccagcgacttcttccccagcgtgGGATGCGGAGGGTCCGGCGGCCGCTCATCTCGTGCGACATCAAGCTATACTCTAA	18	27	Capsid protein	http://www.ncbi.nlm.nih.gov/protein/AAL31859.1	Capsid protein	http://www.uniprot.org/uniprot/Q76R61	Hepatitis B virus	http://purl.obolibrary.org/obo/NCBITaxon_10407	Hepatitis B virus	http://purl.obolibrary.org/obo/NCBITaxon_10407
16836	Linear peptide	FLPSDFLPSV	TTCCTGCCCAGCGACTTCCTGCCCAGCGTG	CAGGAGGGCTCGGCAttcctgcccagcgacttcctgcccagcgtgGGATGCGGAGGGTCCGGCGGCCGCTCATCTCGTGCGACATCAAGCTATACTCTAA	47	56	External core antigen	http://www.ncbi.nlm.nih.gov/protein/AAR03815.1	External core antigen	http://www.uniprot.org/uniprot/P0C767	Hepatitis B virus	http://purl.obolibrary.org/obo/NCBITaxon_10407	Hepatitis B virus	http://purl.obolibrary.org/obo/NCBITaxon_10407	This epitope is a mutant of the core 18-27 peptide of HBV which was identified in infected patients.
16839	Linear peptide	FLPSDTNMGL	TTCCTGCCCAGCGACACCAACATGGGCCTG	CAGGAGGGCTCGGCAttcctgcccagcgacaccaacatgggcctgGGATGCGGAGGGTCCGGCGGCCGCTCATCTCGTGCGACATCAAGCTATACTCTAA			External core antigen	https://ontology.iedb.org/ontology/ONTIE_0002581	External core antigen	http://www.uniprot.org/uniprot/P0C767	Hepatitis B virus	http://purl.obolibrary.org/obo/NCBITaxon_10407	Hepatitis B virus	http://purl.obolibrary.org/obo/NCBITaxon_10407	This epitope is a mutant of the core 18-27 peptide of HBV which was identified in infected patients.
16854	Linear peptide	FLPSPLFFFL	TTCCTGCCCAGCCCCCTGTTCTTCTTCCTG	CAGGAGGGCTCGGCAttcctgcccagccccctgttcttcttcctgGGATGCGGAGGGTCCGGCGGCCGCTCATCTCGTGCGACATCAAGCTATACTCTAA	4	13	TCR gamma alternate reading frame protein isoform 1	http://www.ncbi.nlm.nih.gov/protein/NP_001003799.1			Homo sapiens	http://purl.obolibrary.org/obo/NCBITaxon_9606	Homo sapiens	http://purl.obolibrary.org/obo/NCBITaxon_9606		analog
16856	Linear peptide	FLPVDFFPSI	TTCCTGCCCGTGGACTTCTTCCCCAGCATC	CAGGAGGGCTCGGCAttcctgcccgtggacttcttccccagcatcGGATGCGGAGGGTCCGGCGGCCGCTCATCTCGTGCGACATCAAGCTATACTCTAA	18	27	core protein	http://www.ncbi.nlm.nih.gov/protein/CAL29866.1	Capsid protein	http://www.uniprot.org/uniprot/Q76R61	Hepatitis B virus	http://purl.obolibrary.org/obo/NCBITaxon_10407	Hepatitis B virus	http://purl.obolibrary.org/obo/NCBITaxon_10407		analog
16857	Linear peptide	FLPVDFFPSV	TTCCTGCCCGTGGACTTCTTCCCCAGCGTG	CAGGAGGGCTCGGCAttcctgcccgtggacttcttccccagcgtgGGATGCGGAGGGTCCGGCGGCCGCTCATCTCGTGCGACATCAAGCTATACTCTAA	47	56	External core antigen	http://www.ncbi.nlm.nih.gov/protein/CAA59565.1	External core antigen	http://www.uniprot.org/uniprot/P0C767	Hepatitis B virus	http://purl.obolibrary.org/obo/NCBITaxon_10407	Hepatitis B virus	http://purl.obolibrary.org/obo/NCBITaxon_10407
16878	Linear peptide	FLRGRAYGL	TTCCTGAGGGGCAGGGCCTACGGCCTG	CAGGAGGGCTCGGCAttcctgaggggcagggcctacggcctgGGATGCGGAGGGTCCGGCGGCCGCTCATCTCGTGCGACATCAAGCTATACTCTAATAT	11	19	Epstein-Barr nuclear antigen 3	http://www.ncbi.nlm.nih.gov/protein/AAB20988.1	Epstein-Barr nuclear antigen 3	http://www.uniprot.org/uniprot/P12977	Human gammaherpesvirus 4	http://purl.obolibrary.org/obo/NCBITaxon_10376	Human gammaherpesvirus 4	http://purl.obolibrary.org/obo/NCBITaxon_10376
16888	Linear peptide	FLSFASLFL	TTCCTGAGCTTCGCCAGCCTGTTCCTG	CAGGAGGGCTCGGCAttcctgagcttcgccagcctgttcctgGGATGCGGAGGGTCCGGCGGCCGCTCATCTCGTGCGACATCAAGCTATACTCTAATAT	150	158	Nucleoprotein	http://www.ncbi.nlm.nih.gov/protein/CAA70541.1	Nucleoprotein	http://www.uniprot.org/uniprot/P18272	Zaire ebolavirus	http://purl.obolibrary.org/obo/NCBITaxon_186538	Zaire ebolavirus	http://purl.obolibrary.org/obo/NCBITaxon_186538
16889	Linear peptide	FLSHDFTLV	TTCCTGAGCCACGACTTCACCCTGGTG	CAGGAGGGCTCGGCAttcctgagccacgacttcaccctggtgGGATGCGGAGGGTCCGGCGGCCGCTCATCTCGTGCGACATCAAGCTATACTCTAATAT	552	560	Trans-sialidase, putative (UniProt:K4DSI5)	http://www.ncbi.nlm.nih.gov/protein/XP_817882.1	Trans-sialidase, putative	http://www.uniprot.org/uniprot/K4DSI5	Trypanosoma cruzi	http://purl.obolibrary.org/obo/NCBITaxon_5693	Trypanosoma cruzi	http://purl.obolibrary.org/obo/NCBITaxon_5693
16890	Linear peptide	FLSHNFTLV	TTCCTGAGCCACAACTTCACCCTGGTG	CAGGAGGGCTCGGCAttcctgagccacaacttcaccctggtgGGATGCGGAGGGTCCGGCGGCCGCTCATCTCGTGCGACATCAAGCTATACTCTAATAT	572	580	Trans-sialidase, putative (UniProt:K4EDE0)	http://www.ncbi.nlm.nih.gov/protein/XP_810777.1	Trans-sialidase, putative	http://www.uniprot.org/uniprot/K4EDE0	Trypanosoma cruzi	http://purl.obolibrary.org/obo/NCBITaxon_5693	Trypanosoma cruzi	http://purl.obolibrary.org/obo/NCBITaxon_5693
16929	Linear peptide	FLTSVINRV	TTCCTGACCAGCGTGATCAACAGGGTG	CAGGAGGGCTCGGCAttcctgaccagcgtgatcaacagggtgGGATGCGGAGGGTCCGGCGGCCGCTCATCTCGTGCGACATCAAGCTATACTCTAATAT	404	412	Protein F12	http://www.ncbi.nlm.nih.gov/protein/CAM58220.1	Protein F12	http://www.uniprot.org/uniprot/Q80HX6	Vaccinia virus Ankara	http://purl.obolibrary.org/obo/NCBITaxon_126794	Vaccinia virus	http://purl.obolibrary.org/obo/NCBITaxon_10245
16936	Linear peptide	FLVDAIVRV	TTCCTGGTGGACGCCATCGTGAGGGTG	CAGGAGGGCTCGGCAttcctggtggacgccatcgtgagggtgGGATGCGGAGGGTCCGGCGGCCGCTCATCTCGTGCGACATCAAGCTATACTCTAATAT	289	297	Tegument protein UL47	http://www.ncbi.nlm.nih.gov/protein/NP_044517.1	Tegument protein UL47	http://www.uniprot.org/uniprot/P89467	Human alphaherpesvirus 2	http://purl.obolibrary.org/obo/NCBITaxon_10310	Human alphaherpesvirus 2	http://purl.obolibrary.org/obo/NCBITaxon_10310
16937	Linear peptide	FLVDAIVRVA	TTCCTGGTGGACGCCATCGTGAGGGTGGCC	CAGGAGGGCTCGGCAttcctggtggacgccatcgtgagggtggccGGATGCGGAGGGTCCGGCGGCCGCTCATCTCGTGCGACATCAAGCTATACTCTAA	289	298	Tegument protein UL47	http://www.ncbi.nlm.nih.gov/protein/NP_044517.1	Tegument protein UL47	http://www.uniprot.org/uniprot/P89467	Human alphaherpesvirus 2	http://purl.obolibrary.org/obo/NCBITaxon_10310	Human alphaherpesvirus 2	http://purl.obolibrary.org/obo/NCBITaxon_10310
16950	Linear peptide	FLVIAINAM	TTCCTGGTGATCGCCATCAACGCCATG	CAGGAGGGCTCGGCAttcctggtgatcgccatcaacgccatgGGATGCGGAGGGTCCGGCGGCCGCTCATCTCGTGCGACATCAAGCTATACTCTAATAT	342	350	Early transcription factor 82 kDa subunit	http://www.ncbi.nlm.nih.gov/protein/AAR17969.1	Early transcription factor 82 kDa subunit	http://www.uniprot.org/uniprot/P20636	Vaccinia virus	http://purl.obolibrary.org/obo/NCBITaxon_10245	Vaccinia virus	http://purl.obolibrary.org/obo/NCBITaxon_10245
16978	Linear peptide	FLYALALL	TTCCTGTACGCCCTGGCCCTGCTG	CAGGAGGGCTCGGCAttcctgtacgccctggccctgctgGGATGCGGAGGGTCCGGCGGCCGCTCATCTCGTGCGACATCAAGCTATACTCTAATATAGC	356	363	Latent membrane protein 2	http://www.ncbi.nlm.nih.gov/protein/AAA45887.1	Latent membrane protein 2	http://www.uniprot.org/uniprot/P13285	Human gammaherpesvirus 4	http://purl.obolibrary.org/obo/NCBITaxon_10376	Human gammaherpesvirus 4	http://purl.obolibrary.org/obo/NCBITaxon_10376
16979	Linear peptide	FLYALALLL	TTCCTGTACGCCCTGGCCCTGCTGCTG	CAGGAGGGCTCGGCAttcctgtacgccctggccctgctgctgGGATGCGGAGGGTCCGGCGGCCGCTCATCTCGTGCGACATCAAGCTATACTCTAATAT	355	363	Latent membrane protein 2	http://www.ncbi.nlm.nih.gov/protein/P0C729.1	Latent membrane protein 2	http://www.uniprot.org/uniprot/P13285	Human gammaherpesvirus 4	http://purl.obolibrary.org/obo/NCBITaxon_10376	Human gammaherpesvirus 4	http://purl.obolibrary.org/obo/NCBITaxon_10376
16990	Linear peptide	FLYGALLLA	TTCCTGTACGGCGCCCTGCTGCTGGCC	CAGGAGGGCTCGGCAttcctgtacggcgccctgctgctggccGGATGCGGAGGGTCCGGCGGCCGCTCATCTCGTGCGACATCAAGCTATACTCTAATAT	80	88	Myelin proteolipid protein	http://www.ncbi.nlm.nih.gov/protein/AAA59565.1	Myelin proteolipid protein	http://www.uniprot.org/uniprot/P60201	Homo sapiens	http://purl.obolibrary.org/obo/NCBITaxon_9606	Homo sapiens	http://purl.obolibrary.org/obo/NCBITaxon_9606
17079	Linear peptide	FMPKVNFEV	TTCATGCCCAAGGTGAACTTCGAGGTG	CAGGAGGGCTCGGCAttcatgcccaaggtgaacttcgaggtgGGATGCGGAGGGTCCGGCGGCCGCTCATCTCGTGCGACATCAAGCTATACTCTAATAT	277	285	Other Francisella tularensis protein	http://www.ncbi.nlm.nih.gov/protein/YP_170074.1			Francisella tularensis subsp. tularensis SCHU S4	http://purl.obolibrary.org/obo/NCBITaxon_177416	Francisella tularensis	http://purl.obolibrary.org/obo/NCBITaxon_263
17110	Linear peptide	FMVFLQTHI	TTCATGGTGTTCCTGCAGACCCACATC	CAGGAGGGCTCGGCAttcatggtgttcctgcagacccacatcGGATGCGGAGGGTCCGGCGGCCGCTCATCTCGTGCGACATCAAGCTATACTCTAATAT	562	570	Epstein-Barr nuclear antigen 1	http://www.ncbi.nlm.nih.gov/protein/Q777E1	Epstein-Barr nuclear antigen 1	http://www.uniprot.org/uniprot/P03211	Human gammaherpesvirus 4	http://purl.obolibrary.org/obo/NCBITaxon_10376	Human gammaherpesvirus 4	http://purl.obolibrary.org/obo/NCBITaxon_10376
17119	Linear peptide	FMYSDFHFI	TTCATGTACAGCGACTTCCACTTCATC	CAGGAGGGCTCGGCAttcatgtacagcgacttccacttcatcGGATGCGGAGGGTCCGGCGGCCGCTCATCTCGTGCGACATCAAGCTATACTCTAATAT	46	54	Polymerase acidic protein	http://www.ncbi.nlm.nih.gov/protein/P03433.2	Polymerase acidic protein	http://www.uniprot.org/uniprot/P03433	Influenza A virus (A/Puerto Rico/8/1934(H1N1))	http://purl.obolibrary.org/obo/NCBITaxon_211044	Influenza A virus	http://purl.obolibrary.org/obo/NCBITaxon_11320
17353	Linear peptide	FPPSPLFFFL	TTCCCCCCCAGCCCCCTGTTCTTCTTCCTG	CAGGAGGGCTCGGCAttcccccccagccccctgttcttcttcctgGGATGCGGAGGGTCCGGCGGCCGCTCATCTCGTGCGACATCAAGCTATACTCTAA	4	13	Other Homo sapiens (human) protein	http://www.ncbi.nlm.nih.gov/protein/NP_001003799.1			Homo sapiens	http://purl.obolibrary.org/obo/NCBITaxon_9606	Homo sapiens	http://purl.obolibrary.org/obo/NCBITaxon_9606
18011	Linear peptide	FTLVAPVSI	TTCACCCTGGTGGCCCCCGTGAGCATC	CAGGAGGGCTCGGCAttcaccctggtggcccccgtgagcatcGGATGCGGAGGGTCCGGCGGCCGCTCATCTCGTGCGACATCAAGCTATACTCTAATAT	534	542	Trans-sialidase, putative (UniProt:K4DPA8)	http://www.ncbi.nlm.nih.gov/protein/JH0823	Trans-sialidase, putative	http://www.uniprot.org/uniprot/K4DPA8	Trypanosoma cruzi	http://purl.obolibrary.org/obo/NCBITaxon_5693	Trypanosoma cruzi	http://purl.obolibrary.org/obo/NCBITaxon_5693
18062	Linear peptide	FTSAVLLLV	TTCACCAGCGCCGTGCTGCTGCTGGTG	CAGGAGGGCTCGGCAttcaccagcgccgtgctgctgctggtgGGATGCGGAGGGTCCGGCGGCCGCTCATCTCGTGCGACATCAAGCTATACTCTAATAT	6	14	Trans-sialidase, putative (UniProt:K4DPA8)	http://www.ncbi.nlm.nih.gov/protein/JH0823	Trans-sialidase, putative	http://www.uniprot.org/uniprot/K4DPA8	Trypanosoma cruzi	http://purl.obolibrary.org/obo/NCBITaxon_5693	Trypanosoma cruzi	http://purl.obolibrary.org/obo/NCBITaxon_5693
18143	Linear peptide	FVDVIIIKV	TTCGTGGACGTGATCATCATCAAGGTG	CAGGAGGGCTCGGCAttcgtggacgtgatcatcatcaaggtgGGATGCGGAGGGTCCGGCGGCCGCTCATCTCGTGCGACATCAAGCTATACTCTAATAT	13	21	Semaphorin-like protein A39	http://www.ncbi.nlm.nih.gov/protein/YP_233045.1	Semaphorin-like protein A39	http://www.uniprot.org/uniprot/P24764	Vaccinia virus Copenhagen	http://purl.obolibrary.org/obo/NCBITaxon_10249	Vaccinia virus	http://purl.obolibrary.org/obo/NCBITaxon_10245
18144	Linear peptide	FVDYNFSLV	TTCGTGGACTACAACTTCAGCCTGGTG	CAGGAGGGCTCGGCAttcgtggactacaacttcagcctggtgGGATGCGGAGGGTCCGGCGGCCGCTCATCTCGTGCGACATCAAGCTATACTCTAATAT	550	558	Trans-sialidase, putative (UniProt:K4E8X6)	http://www.ncbi.nlm.nih.gov/protein/XP_804884.1	Trans-sialidase, putative	http://www.uniprot.org/uniprot/K4E8X6	Trypanosoma cruzi	http://purl.obolibrary.org/obo/NCBITaxon_5693	Trypanosoma cruzi	http://purl.obolibrary.org/obo/NCBITaxon_5693
18145	Linear peptide	FVDYNFTIV	TTCGTGGACTACAACTTCACCATCGTG	CAGGAGGGCTCGGCAttcgtggactacaacttcaccatcgtgGGATGCGGAGGGTCCGGCGGCCGCTCATCTCGTGCGACATCAAGCTATACTCTAATAT	514	522	Trans-sialidase, putative (UniProt:K4E505)	http://www.ncbi.nlm.nih.gov/protein/AAA30259.1	Trans-sialidase, putative	http://www.uniprot.org/uniprot/K4E505	Trypanosoma cruzi	http://purl.obolibrary.org/obo/NCBITaxon_5693	Trypanosoma cruzi	http://purl.obolibrary.org/obo/NCBITaxon_5693
18155	Linear peptide	FVFDRPLPV	TTCGTGTTCGACAGGCCCCTGCCCGTG	CAGGAGGGCTCGGCAttcgtgttcgacaggcccctgcccgtgGGATGCGGAGGGTCCGGCGGCCGCTCATCTCGTGCGACATCAAGCTATACTCTAATAT	97	105	Proteasome subunit alpha type	http://www.ncbi.nlm.nih.gov/protein/NP_001137409.1	Proteasome subunit alpha type	http://www.uniprot.org/uniprot/B4DEV8	Homo sapiens	http://purl.obolibrary.org/obo/NCBITaxon_9606	Homo sapiens	http://purl.obolibrary.org/obo/NCBITaxon_9606
18159	Linear peptide	FVFLRNFSL	TTCGTGTTCCTGAGGAACTTCAGCCTG	CAGGAGGGCTCGGCAttcgtgttcctgaggaacttcagcctgGGATGCGGAGGGTCCGGCGGCCGCTCATCTCGTGCGACATCAAGCTATACTCTAATAT	27	35	Other Homo sapiens (human) protein	http://www.ncbi.nlm.nih.gov/protein/NP_001003799.1			Homo sapiens	http://purl.obolibrary.org/obo/NCBITaxon_9606	Homo sapiens	http://purl.obolibrary.org/obo/NCBITaxon_9606
18239	Linear peptide	FVNFNSVKNL	TTCGTGAACTTCAACAGCGTGAAGAACCTG	CAGGAGGGCTCGGCAttcgtgaacttcaacagcgtgaagaacctgGGATGCGGAGGGTCCGGCGGCCGCTCATCTCGTGCGACATCAAGCTATACTCTAA	251	260	Protein F12	http://www.ncbi.nlm.nih.gov/protein/P21053.1	Protein F12	http://www.uniprot.org/uniprot/Q80HX6	Vaccinia virus Copenhagen	http://purl.obolibrary.org/obo/NCBITaxon_10249	Vaccinia virus	http://purl.obolibrary.org/obo/NCBITaxon_10245
18241	Linear peptide	FVNHDFTVV	TTCGTGAACCACGACTTCACCGTGGTG	CAGGAGGGCTCGGCAttcgtgaaccacgacttcaccgtggtgGGATGCGGAGGGTCCGGCGGCCGCTCATCTCGTGCGACATCAAGCTATACTCTAATAT	508	516	Trans-sialidase, putative (UniProt:K4DVP7)	http://www.ncbi.nlm.nih.gov/protein/AAB18265.1	Trans-sialidase, putative	http://www.uniprot.org/uniprot/K4DVP7	Trypanosoma cruzi	http://purl.obolibrary.org/obo/NCBITaxon_5693	Trypanosoma cruzi	http://purl.obolibrary.org/obo/NCBITaxon_5693	Imported from the TopBank database.
18242	Linear peptide	FVNHRFTLV	TTCGTGAACCACAGGTTCACCCTGGTG	CAGGAGGGCTCGGCAttcgtgaaccacaggttcaccctggtgGGATGCGGAGGGTCCGGCGGCCGCTCATCTCGTGCGACATCAAGCTATACTCTAATAT	551	559	Trans-sialidase, putative (UniProt:K4E505)	http://www.ncbi.nlm.nih.gov/protein/XP_803984.1	Trans-sialidase, putative	http://www.uniprot.org/uniprot/K4E505	Trypanosoma cruzi	http://purl.obolibrary.org/obo/NCBITaxon_5693	Trypanosoma cruzi	http://purl.obolibrary.org/obo/NCBITaxon_5693
18250	Linear peptide	FVNYDFALV	TTCGTGAACTACGACTTCGCCCTGGTG	CAGGAGGGCTCGGCAttcgtgaactacgacttcgccctggtgGGATGCGGAGGGTCCGGCGGCCGCTCATCTCGTGCGACATCAAGCTATACTCTAATAT			Other Trypanosoma cruzi protein	https://ontology.iedb.org/ontology/ONTIE_0002050			Trypanosoma cruzi	http://purl.obolibrary.org/obo/NCBITaxon_5693	Trypanosoma cruzi	http://purl.obolibrary.org/obo/NCBITaxon_5693
18251	Linear peptide	FVNYDFTIV	TTCGTGAACTACGACTTCACCATCGTG	CAGGAGGGCTCGGCAttcgtgaactacgacttcaccatcgtgGGATGCGGAGGGTCCGGCGGCCGCTCATCTCGTGCGACATCAAGCTATACTCTAATAT	513	521	Trans-sialidase, putative (UniProt:K4DXB0)	http://www.ncbi.nlm.nih.gov/protein/EAN98330.1	Trans-sialidase, putative	http://www.uniprot.org/uniprot/K4DXB0	Trypanosoma cruzi	http://purl.obolibrary.org/obo/NCBITaxon_5693	Trypanosoma cruzi	http://purl.obolibrary.org/obo/NCBITaxon_5693
18252	Linear peptide	FVNYNFTLV	TTCGTGAACTACAACTTCACCCTGGTG	CAGGAGGGCTCGGCAttcgtgaactacaacttcaccctggtgGGATGCGGAGGGTCCGGCGGCCGCTCATCTCGTGCGACATCAAGCTATACTCTAATAT	564	572	Trans-sialidase, putative (UniProt:K4DSQ4)	http://www.ncbi.nlm.nih.gov/protein/XP_814186.1	Trans-sialidase, putative	http://www.uniprot.org/uniprot/K4DSQ4	Trypanosoma cruzi	http://purl.obolibrary.org/obo/NCBITaxon_5693	Trypanosoma cruzi	http://purl.obolibrary.org/obo/NCBITaxon_5693
18284	Linear peptide	FVSCDFTIV	TTCGTGAGCTGCGACTTCACCATCGTG	CAGGAGGGCTCGGCAttcgtgagctgcgacttcaccatcgtgGGATGCGGAGGGTCCGGCGGCCGCTCATCTCGTGCGACATCAAGCTATACTCTAATAT			Other Trypanosoma cruzi protein	https://ontology.iedb.org/ontology/ONTIE_0002050			Trypanosoma cruzi	http://purl.obolibrary.org/obo/NCBITaxon_5693	Trypanosoma cruzi	http://purl.obolibrary.org/obo/NCBITaxon_5693	The epitope sequence was presumably derived from the nucleotide sequence of a Trans-sialidase pseudogene.
19575	Linear peptide	GFLIAYQPLL	GGCTTCCTGATCGCCTACCAGCCCCTGCTG	CAGGAGGGCTCGGCAggcttcctgatcgcctaccagcccctgctgGGATGCGGAGGGTCCGGCGGCCGCTCATCTCGTGCGACATCAAGCTATACTCTAA	442	451	Envelope glycoprotein B	http://www.ncbi.nlm.nih.gov/protein/AAB72100.1	Envelope glycoprotein B	http://www.uniprot.org/uniprot/P08666	Human alphaherpesvirus 2	http://purl.obolibrary.org/obo/NCBITaxon_10310	Human alphaherpesvirus 2	http://purl.obolibrary.org/obo/NCBITaxon_10310
20213	Linear peptide	GIAGGLALL	GGCATCGCCGGCGGCCTGGCCCTGCTG	CAGGAGGGCTCGGCAggcatcgccggcggcctggccctgctgGGATGCGGAGGGTCCGGCGGCCGCTCATCTCGTGCGACATCAAGCTATACTCTAATAT	500	508	Thrombospondin-related anonymous protein, TRAP	http://www.ncbi.nlm.nih.gov/protein/P16893.1	Thrombospondin-related anonymous protein, TRAP	http://www.uniprot.org/uniprot/Q76NM2	Plasmodium falciparum	http://purl.obolibrary.org/obo/NCBITaxon_5833	Plasmodium falciparum	http://purl.obolibrary.org/obo/NCBITaxon_5833
20311	Linear peptide	GIIYIIYKL	GGCATCATCTACATCATCTACAAGCTG	CAGGAGGGCTCGGCAggcatcatctacatcatctacaagctgGGATGCGGAGGGTCCGGCGGCCGCTCATCTCGTGCGACATCAAGCTATACTCTAATAT	1505	1513	Genome polyprotein	http://www.ncbi.nlm.nih.gov/protein/P03313.4	Genome polyprotein	http://www.uniprot.org/uniprot/P08292	Coxsackievirus B3	http://purl.obolibrary.org/obo/NCBITaxon_12072	Enterovirus B	http://purl.obolibrary.org/obo/NCBITaxon_138949
20354	Linear peptide	GILGFVFTL	GGCATCCTGGGCTTCGTGTTCACCCTG	CAGGAGGGCTCGGCAggcatcctgggcttcgtgttcaccctgGGATGCGGAGGGTCCGGCGGCCGCTCATCTCGTGCGACATCAAGCTATACTCTAATAT	58	66	Matrix protein 1	http://www.ncbi.nlm.nih.gov/protein/ABO21712.1	Matrix protein 1	http://www.uniprot.org/uniprot/P03485	Influenza A virus (A/Puerto Rico/8/1934(H1N1))	http://purl.obolibrary.org/obo/NCBITaxon_211044	Influenza A virus	http://purl.obolibrary.org/obo/NCBITaxon_11320
20355	Linear peptide	GILGFVFTLT	GGCATCCTGGGCTTCGTGTTCACCCTGACC	CAGGAGGGCTCGGCAggcatcctgggcttcgtgttcaccctgaccGGATGCGGAGGGTCCGGCGGCCGCTCATCTCGTGCGACATCAAGCTATACTCTAA	58	67	Matrix protein 1	http://www.ncbi.nlm.nih.gov/protein/P03485.1	Matrix protein 1	http://www.uniprot.org/uniprot/P03485	Influenza A virus (A/Puerto Rico/8/1934(H1N1))	http://purl.obolibrary.org/obo/NCBITaxon_211044	Influenza A virus	http://purl.obolibrary.org/obo/NCBITaxon_11320
20369	Linear peptide	GILTVSVAV	GGCATCCTGACCGTGAGCGTGGCCGTG	CAGGAGGGCTCGGCAggcatcctgaccgtgagcgtggccgtgGGATGCGGAGGGTCCGGCGGCCGCTCATCTCGTGCGACATCAAGCTATACTCTAATAT	120	128	Alpha-crystallin	http://www.ncbi.nlm.nih.gov/protein/NP_216547.1	Alpha-crystallin	http://www.uniprot.org/uniprot/P9WMK1	Mycobacterium tuberculosis H37Rv	http://purl.obolibrary.org/obo/NCBITaxon_83332	Mycobacterium tuberculosis	http://purl.obolibrary.org/obo/NCBITaxon_1773	The epitope sequence is from the cited reference: Caccamo et al. (2009) PLoS One 4: e5528 [PMID: 19436760].
20752	Linear peptide	GLADTVVAC	GGCCTGGCCGACACCGTGGTGGCCTGC	CAGGAGGGCTCGGCAggcctggccgacaccgtggtggcctgcGGATGCGGAGGGTCCGGCGGCCGCTCATCTCGTGCGACATCAAGCTATACTCTAATAT	551	559	Tegument protein UL47	http://www.ncbi.nlm.nih.gov/protein/NP_044517.1	Tegument protein UL47	http://www.uniprot.org/uniprot/P89467	Human alphaherpesvirus 2	http://purl.obolibrary.org/obo/NCBITaxon_10310	Human alphaherpesvirus 2	http://purl.obolibrary.org/obo/NCBITaxon_10310
20767	Linear peptide	GLAPPQHLIRV	GGCCTGGCCCCCCCCCAGCACCTGATCAGGGTG	CAGGAGGGCTCGGCAggcctggcccccccccagcacctgatcagggtgGGATGCGGAGGGTCCGGCGGCCGCTCATCTCGTGCGACATCAAGCTATACTC	62	72	Cellular tumor antigen p53	http://www.ncbi.nlm.nih.gov/protein/ABO28415.1	Cellular tumor antigen p53	http://www.uniprot.org/uniprot/P04637	Homo sapiens	http://purl.obolibrary.org/obo/NCBITaxon_9606	Homo sapiens	http://purl.obolibrary.org/obo/NCBITaxon_9606
20774	Linear peptide	GLATDVQTV	GGCCTGGCCACCGACGTGCAGACCGTG	CAGGAGGGCTCGGCAggcctggccaccgacgtgcagaccgtgGGATGCGGAGGGTCCGGCGGCCGCTCATCTCGTGCGACATCAAGCTATACTCTAATAT	55	63	Proteasome subunit beta type-3	http://www.ncbi.nlm.nih.gov/protein/P49720.2	Proteasome subunit beta type-3	http://www.uniprot.org/uniprot/P49720	Homo sapiens	http://purl.obolibrary.org/obo/NCBITaxon_9606	Homo sapiens	http://purl.obolibrary.org/obo/NCBITaxon_9606
20786	Linear peptide	GLCPHCINV	GGCCTGTGCCCCCACTGCATCAACGTG	CAGGAGGGCTCGGCAggcctgtgcccccactgcatcaacgtgGGATGCGGAGGGTCCGGCGGCCGCTCATCTCGTGCGACATCAAGCTATACTCTAATAT	613	621	Non-structural protein 1	http://www.ncbi.nlm.nih.gov/protein/P07298.1	Non-structural protein 1	http://www.uniprot.org/uniprot/Q9PZT1	Human parvovirus B19	http://purl.obolibrary.org/obo/NCBITaxon_10798	Primate erythroparvovirus 1	http://purl.obolibrary.org/obo/NCBITaxon_1511900
20787	Linear peptide	GLCPHCINVG	GGCCTGTGCCCCCACTGCATCAACGTGGGC	CAGGAGGGCTCGGCAggcctgtgcccccactgcatcaacgtgggcGGATGCGGAGGGTCCGGCGGCCGCTCATCTCGTGCGACATCAAGCTATACTCTAA	613	622	Non-structural protein 1	http://www.ncbi.nlm.nih.gov/protein/P07298.1	Non-structural protein 1	http://www.uniprot.org/uniprot/Q9PZT1	Human parvovirus B19	http://purl.obolibrary.org/obo/NCBITaxon_10798	Primate erythroparvovirus 1	http://purl.obolibrary.org/obo/NCBITaxon_1511900
20788	Linear peptide	GLCTLVAML	GGCCTGTGCACCCTGGTGGCCATGCTG	CAGGAGGGCTCGGCAggcctgtgcaccctggtggccatgctgGGATGCGGAGGGTCCGGCGGCCGCTCATCTCGTGCGACATCAAGCTATACTCTAATAT	259	267	mRNA export factor ICP27 homolog	http://www.ncbi.nlm.nih.gov/protein/CAD53409.1	mRNA export factor ICP27 homolog	http://www.uniprot.org/uniprot/Q04360	Human gammaherpesvirus 4	http://purl.obolibrary.org/obo/NCBITaxon_10376	Human gammaherpesvirus 4	http://purl.obolibrary.org/obo/NCBITaxon_10376
20790	Linear peptide	GLDCARLEI	GGCCTGGACTGCGCCAGGCTGGAGATC	CAGGAGGGCTCGGCAggcctggactgcgccaggctggagatcGGATGCGGAGGGTCCGGCGGCCGCTCATCTCGTGCGACATCAAGCTATACTCTAATAT	1736	1744	Hantaan orthohantavirus protein	http://www.ncbi.nlm.nih.gov/protein/Q89913			Hantaan orthohantavirus	http://purl.obolibrary.org/obo/NCBITaxon_1980471	Hantaan orthohantavirus	http://purl.obolibrary.org/obo/NCBITaxon_1980471	Data originally imported from the HLA Ligand Database (http://hlaligand.ouhsc.edu/) and recurated. The identical sequence is found in Sin Nombre virus (residues 1737-1745; GenBank no. 38371728).
20833	Linear peptide	GLFDFVNFV	GGCCTGTTCGACTTCGTGAACTTCGTG	CAGGAGGGCTCGGCAggcctgttcgacttcgtgaacttcgtgGGATGCGGAGGGTCCGGCGGCCGCTCATCTCGTGCGACATCAAGCTATACTCTAATAT	142	150	Protein A46	http://www.ncbi.nlm.nih.gov/protein/ABD52663.1	Protein A46	http://www.uniprot.org/uniprot/P26672	Vaccinia virus	http://purl.obolibrary.org/obo/NCBITaxon_10245	Vaccinia virus	http://purl.obolibrary.org/obo/NCBITaxon_10245
20837	Linear peptide	GLFGAIAGFI	GGCCTGTTCGGCGCCATCGCCGGCTTCATC	CAGGAGGGCTCGGCAggcctgttcggcgccatcgccggcttcatcGGATGCGGAGGGTCCGGCGGCCGCTCATCTCGTGCGACATCAAGCTATACTCTAA	344	353	Hemagglutinin	http://www.ncbi.nlm.nih.gov/protein/CAC86622.1	Hemagglutinin	http://www.uniprot.org/uniprot/P03452	Influenza A virus (A/New Caledonia/20/1999(H1N1))	http://purl.obolibrary.org/obo/NCBITaxon_381512	Influenza A virus	http://purl.obolibrary.org/obo/NCBITaxon_11320
20847	Linear peptide	GLFGGGGGV	GGCCTGTTCGGCGGCGGCGGCGGCGTG	CAGGAGGGCTCGGCAggcctgttcggcggcggcggcggcgtgGGATGCGGAGGGTCCGGCGGCCGCTCATCTCGTGCGACATCAAGCTATACTCTAATAT
20849	Linear peptide	GLFGGLNWI	GGCCTGTTCGGCGGCCTGAACTGGATC	CAGGAGGGCTCGGCAggcctgttcggcggcctgaactggatcGGATGCGGAGGGTCCGGCGGCCGCTCATCTCGTGCGACATCAAGCTATACTCTAATAT	729	737	Genome polyprotein	http://www.ncbi.nlm.nih.gov/protein/P03314.1	Genome polyprotein	http://www.uniprot.org/uniprot/P03314	Yellow fever virus 17D	http://purl.obolibrary.org/obo/NCBITaxon_11090	Yellow fever virus	http://purl.obolibrary.org/obo/NCBITaxon_11089
20894	Linear peptide	GLGWVGWLL	GGCCTGGGCTGGGTGGGCTGGCTGCTG	CAGGAGGGCTCGGCAggcctgggctgggtgggctggctgctgGGATGCGGAGGGTCCGGCGGCCGCTCATCTCGTGCGACATCAAGCTATACTCTAATAT	89	97	Genome polyprotein	http://www.ncbi.nlm.nih.gov/protein/BAF91806.1	Genome polyprotein	http://www.uniprot.org/uniprot/P27958	Hepatitis C virus	http://purl.obolibrary.org/obo/NCBITaxon_11103	Hepatitis C virus	http://purl.obolibrary.org/obo/NCBITaxon_11103
20910	Linear peptide	GLIDIAPHQI	GGCCTGATCGACATCGCCCCCCACCAGATC	CAGGAGGGCTCGGCAggcctgatcgacatcgccccccaccagatcGGATGCGGAGGGTCCGGCGGCCGCTCATCTCGTGCGACATCAAGCTATACTCTAA	33	42	Isoniazid-induced protein IniB	http://www.ncbi.nlm.nih.gov/protein/NP_214855.1	Isoniazid-induced protein IniB	http://www.uniprot.org/uniprot/P9WJ97	Mycobacterium tuberculosis H37Ra	http://purl.obolibrary.org/obo/NCBITaxon_419947	Mycobacterium tuberculosis	http://purl.obolibrary.org/obo/NCBITaxon_1773
20911	Linear peptide	GLIDIAPHQISS	GGCCTGATCGACATCGCCCCCCACCAGATCAGCAGC	CAGGAGGGCTCGGCAggcctgatcgacatcgccccccaccagatcagcagcGGATGCGGAGGGTCCGGCGGCCGCTCATCTCGTGCGACATCAAGCTATA	33	44	Isoniazid-induced protein IniB	http://www.ncbi.nlm.nih.gov/protein/NP_214855.1	Isoniazid-induced protein IniB	http://www.uniprot.org/uniprot/P9WJ97	Mycobacterium tuberculosis H37Ra	http://purl.obolibrary.org/obo/NCBITaxon_419947	Mycobacterium tuberculosis	http://purl.obolibrary.org/obo/NCBITaxon_1773
20914	Linear peptide	GLIEKNIEL	GGCCTGATCGAGAAGAACATCGAGCTG	CAGGAGGGCTCGGCAggcctgatcgagaagaacatcgagctgGGATGCGGAGGGTCCGGCGGCCGCTCATCTCGTGCGACATCAAGCTATACTCTAATAT	425	433	DNA (cytosine-5)-methyltransferase 1	http://www.ncbi.nlm.nih.gov/protein/P26358.2	DNA (cytosine-5)-methyltransferase 1	http://www.uniprot.org/uniprot/P26358	Homo sapiens	http://purl.obolibrary.org/obo/NCBITaxon_9606	Homo sapiens	http://purl.obolibrary.org/obo/NCBITaxon_9606
20929	Linear peptide	GLIMVLSFL	GGCCTGATCATGGTGCTGAGCTTCCTG	CAGGAGGGCTCGGCAggcctgatcatggtgctgagcttcctgGGATGCGGAGGGTCCGGCGGCCGCTCATCTCGTGCGACATCAAGCTATACTCTAATAT	401	409	Circumsporozoite (CS) protein	http://www.ncbi.nlm.nih.gov/protein/P02893.1	Circumsporozoite (CS) protein	http://www.uniprot.org/uniprot/Q7K740	Plasmodium falciparum	http://purl.obolibrary.org/obo/NCBITaxon_5833	Plasmodium falciparum	http://purl.obolibrary.org/obo/NCBITaxon_5833	Imported from the TopBank database (internal database of LIAI) and recurated.
20937	Linear peptide	GLISLILQI	GGCCTGATCAGCCTGATCCTGCAGATC	CAGGAGGGCTCGGCAggcctgatcagcctgatcctgcagatcGGATGCGGAGGGTCCGGCGGCCGCTCATCTCGTGCGACATCAAGCTATACTCTAATAT	18	26	Neuraminidase	http://www.ncbi.nlm.nih.gov/protein/P03468.2	Neuraminidase	http://www.uniprot.org/uniprot/P03468	Influenza A virus (A/Puerto Rico/8/1934(H1N1))	http://purl.obolibrary.org/obo/NCBITaxon_211044	Influenza A virus	http://purl.obolibrary.org/obo/NCBITaxon_11320
20988	Linear peptide	GLLGCIITSL	GGCCTGCTGGGCTGCATCATCACCAGCCTG	CAGGAGGGCTCGGCAggcctgctgggctgcatcatcaccagcctgGGATGCGGAGGGTCCGGCGGCCGCTCATCTCGTGCGACATCAAGCTATACTCTAA	1038	1047	Genome polyprotein	http://www.ncbi.nlm.nih.gov/protein/P26662.3	Genome polyprotein	http://www.uniprot.org/uniprot/P27958	Hepatitis C virus (isolate Japanese)	http://purl.obolibrary.org/obo/NCBITaxon_11116	Hepatitis C virus	http://purl.obolibrary.org/obo/NCBITaxon_11103
20991	Linear peptide	GLLGFVFTL + MCM(G1, L2)	GGCCTGCTGGGCTTCGTGTTCACCCTG	CAGGAGGGCTCGGCAggcctgctgggcttcgtgttcaccctgGGATGCGGAGGGTCCGGCGGCCGCTCATCTCGTGCGACATCAAGCTATACTCTAATAT											The PRMI analog was derived from the wild-type M58-66 peptide of the influenza A virus matrix protein. This analog peptide contained a leucine at position 59 (I to L) and the bond between residues 58 and 59 was modified to NH-CO instead of CO-NH. This retro-inverso modification represents an isosteric replacement of the amide bonds which confers greater biological stability.
20994	Linear peptide	GLLGNVSTV	GGCCTGCTGGGCAACGTGAGCACCGTG	CAGGAGGGCTCGGCAggcctgctgggcaacgtgagcaccgtgGGATGCGGAGGGTCCGGCGGCCGCTCATCTCGTGCGACATCAAGCTATACTCTAATAT			Circumsporozoite-related antigen	https://ontology.iedb.org/ontology/ONTIE_0002686	Circumsporozoite-related antigen	http://www.uniprot.org/uniprot/Q8IIF0	Plasmodium falciparum	http://purl.obolibrary.org/obo/NCBITaxon_5833	Plasmodium falciparum	http://purl.obolibrary.org/obo/NCBITaxon_5833	Imported from the TopBank database (internal database of LIAI) and recurated.
20996	Linear peptide	GLLGTLVQL	GGCCTGCTGGGCACCCTGGTGCAGCTG	CAGGAGGGCTCGGCAggcctgctgggcaccctggtgcagctgGGATGCGGAGGGTCCGGCGGCCGCTCATCTCGTGCGACATCAAGCTATACTCTAATAT	400	408	Catenin beta-1	http://www.ncbi.nlm.nih.gov/protein/BAG70078.1	Catenin beta-1	http://www.uniprot.org/uniprot/P35222	Homo sapiens	http://purl.obolibrary.org/obo/NCBITaxon_9606	Homo sapiens	http://purl.obolibrary.org/obo/NCBITaxon_9606
21000	Linear peptide	GLLHHAPSL	GGCCTGCTGCACCACGCCCCCAGCCTG	CAGGAGGGCTCGGCAggcctgctgcaccacgcccccagcctgGGATGCGGAGGGTCCGGCGGCCGCTCATCTCGTGCGACATCAAGCTATACTCTAATAT	308	316	Glutamine synthetase 1	http://www.ncbi.nlm.nih.gov/protein/NP_216736.1	Glutamine synthetase 1	http://www.uniprot.org/uniprot/P9WN39	Mycobacterium tuberculosis	http://purl.obolibrary.org/obo/NCBITaxon_1773	Mycobacterium tuberculosis	http://purl.obolibrary.org/obo/NCBITaxon_1773
21004	Linear peptide	GLLLLGLWGT	GGCCTGCTGCTGCTGGGCCTGTGGGGCACC	CAGGAGGGCTCGGCAggcctgctgctgctgggcctgtggggcaccGGATGCGGAGGGTCCGGCGGCCGCTCATCTCGTGCGACATCAAGCTATACTCTAA	990	999	Trans-sialidase, putative (UniProt:K4DPA8)	http://www.ncbi.nlm.nih.gov/protein/JH0823	Trans-sialidase, putative	http://www.uniprot.org/uniprot/K4DPA8	Trypanosoma cruzi	http://purl.obolibrary.org/obo/NCBITaxon_5693	Trypanosoma cruzi	http://purl.obolibrary.org/obo/NCBITaxon_5693
21007	Linear peptide	GLLPFHSTL	GGCCTGCTGCCCTTCCACAGCACCCTG	CAGGAGGGCTCGGCAggcctgctgcccttccacagcaccctgGGATGCGGAGGGTCCGGCGGCCGCTCATCTCGTGCGACATCAAGCTATACTCTAATAT	233	241	Protein Tax-1	http://www.ncbi.nlm.nih.gov/protein/AAG31572.1	Protein Tax-1	http://www.uniprot.org/uniprot/P14079	Human T-lymphotropic virus 1	http://purl.obolibrary.org/obo/NCBITaxon_11908	Primate T-lymphotropic virus 1	http://purl.obolibrary.org/obo/NCBITaxon_194440
21013	Linear peptide	GLLPSLLLLL	GGCCTGCTGCCCAGCCTGCTGCTGCTGCTG	CAGGAGGGCTCGGCAggcctgctgcccagcctgctgctgctgctgGGATGCGGAGGGTCCGGCGGCCGCTCATCTCGTGCGACATCAAGCTATACTCTAA	39	48	Trans-sialidase, putative (UniProt:K4DVG6)	http://www.ncbi.nlm.nih.gov/protein/EAN80935.1	Trans-sialidase, putative	http://www.uniprot.org/uniprot/K4DVG6	Trypanosoma cruzi	http://purl.obolibrary.org/obo/NCBITaxon_5693	Trypanosoma cruzi	http://purl.obolibrary.org/obo/NCBITaxon_5693
21023	Linear peptide	GLLRVISGV	GGCCTGCTGAGGGTGATCAGCGGCGTG	CAGGAGGGCTCGGCAggcctgctgagggtgatcagcggcgtgGGATGCGGAGGGTCCGGCGGCCGCTCATCTCGTGCGACATCAAGCTATACTCTAATAT	338	346	Myosin-9	http://www.ncbi.nlm.nih.gov/protein/AAA59888.1	Myosin-9	http://www.uniprot.org/uniprot/P35579	Homo sapiens	http://purl.obolibrary.org/obo/NCBITaxon_9606	Homo sapiens	http://purl.obolibrary.org/obo/NCBITaxon_9606
21038	Linear peptide	GLMNNAFEWI	GGCCTGATGAACAACGCCTTCGAGTGGATC	CAGGAGGGCTCGGCAggcctgatgaacaacgccttcgagtggatcGGATGCGGAGGGTCCGGCGGCCGCTCATCTCGTGCGACATCAAGCTATACTCTAA	188	197	Cysteine peptidase, putative,cysteine peptidase, clan CA, family C1, cathepsin L-like, putative (UniProt:K4DPT9)	http://www.ncbi.nlm.nih.gov/protein/A45629	Cysteine peptidase, putative,cysteine peptidase, clan CA, family C1, cathepsin L-like, putative	http://www.uniprot.org/uniprot/K4DPT9	Trypanosoma cruzi	http://purl.obolibrary.org/obo/NCBITaxon_5693	Trypanosoma cruzi	http://purl.obolibrary.org/obo/NCBITaxon_5693
21041	Linear peptide	GLMWLSYFV	GGCCTGATGTGGCTGAGCTACTTCGTG	CAGGAGGGCTCGGCAggcctgatgtggctgagctacttcgtgGGATGCGGAGGGTCCGGCGGCCGCTCATCTCGTGCGACATCAAGCTATACTCTAATAT	88	96	Membrane protein	http://www.ncbi.nlm.nih.gov/protein/Q692E0	Membrane protein	http://www.uniprot.org/uniprot/P59596	SARS coronavirus TJF	http://purl.obolibrary.org/obo/NCBITaxon_284672	SARS-related coronavirus	http://purl.obolibrary.org/obo/NCBITaxon_694009
21044	Linear peptide	GLNDYLHSV	GGCCTGAACGACTACCTGCACAGCGTG	CAGGAGGGCTCGGCAggcctgaacgactacctgcacagcgtgGGATGCGGAGGGTCCGGCGGCCGCTCATCTCGTGCGACATCAAGCTATACTCTAATAT	247	255	Protein O1	http://www.ncbi.nlm.nih.gov/protein/AAO89347.1	Protein O1	http://www.uniprot.org/uniprot/Q80HX1	Vaccinia virus WR	http://purl.obolibrary.org/obo/NCBITaxon_10254	Vaccinia virus	http://purl.obolibrary.org/obo/NCBITaxon_10245
21078	Linear peptide	GLPVEYLQV	GGCCTGCCCGTGGAGTACCTGCAGGTG	CAGGAGGGCTCGGCAggcctgcccgtggagtacctgcaggtgGGATGCGGAGGGTCCGGCGGCCGCTCATCTCGTGCGACATCAAGCTATACTCTAATAT	48	56	Diacylglycerol acyltransferase/mycolyltransferase Ag85A (UniProt:P9WQP3)	http://www.ncbi.nlm.nih.gov/protein/P0A4V2.1	Diacylglycerol acyltransferase/mycolyltransferase Ag85A	http://www.uniprot.org/uniprot/P9WQP3	Mycobacterium tuberculosis H37Rv	http://purl.obolibrary.org/obo/NCBITaxon_83332	Mycobacterium tuberculosis	http://purl.obolibrary.org/obo/NCBITaxon_1773
21079	Linear peptide	GLQDCTMLV	GGCCTGCAGGACTGCACCATGCTGGTG	CAGGAGGGCTCGGCAggcctgcaggactgcaccatgctggtgGGATGCGGAGGGTCCGGCGGCCGCTCATCTCGTGCGACATCAAGCTATACTCTAATAT	2727	2735	Genome polyprotein	http://www.ncbi.nlm.nih.gov/protein/P26664.3	Genome polyprotein	http://www.uniprot.org/uniprot/P27958	Hepatitis C virus (isolate 1)	http://purl.obolibrary.org/obo/NCBITaxon_11104	Hepatitis C virus	http://purl.obolibrary.org/obo/NCBITaxon_11103
21116	Linear peptide	GLSAMSTTDL	GGCCTGAGCGCCATGAGCACCACCGACCTG	CAGGAGGGCTCGGCAggcctgagcgccatgagcaccaccgacctgGGATGCGGAGGGTCCGGCGGCCGCTCATCTCGTGCGACATCAAGCTATACTCTAA	99	108	Protein X	http://www.ncbi.nlm.nih.gov/protein/BAG70907.1	Protein X	http://www.uniprot.org/uniprot/Q69027	Hepatitis B virus	http://purl.obolibrary.org/obo/NCBITaxon_10407	Hepatitis B virus	http://purl.obolibrary.org/obo/NCBITaxon_10407	Epitope sequence present in HBV subtypes adr and ayw.
21125	Linear peptide	GLSISGNLL	GGCCTGAGCATCAGCGGCAACCTGCTG	CAGGAGGGCTCGGCAggcctgagcatcagcggcaacctgctgGGATGCGGAGGGTCCGGCGGCCGCTCATCTCGTGCGACATCAAGCTATACTCTAATAT	312	320	65 kDa phosphoprotein	http://www.ncbi.nlm.nih.gov/protein/P06725.2	65 kDa phosphoprotein	http://www.uniprot.org/uniprot/Q6SW59	Human herpesvirus 5 strain AD169	http://purl.obolibrary.org/obo/NCBITaxon_10360	Human betaherpesvirus 5	http://purl.obolibrary.org/obo/NCBITaxon_10359	The authors cite Swiss-Prot accession P06725 (GI: 130714) as the source of the epitope.
21137	Linear peptide	GLSPTVWLSA	GGCCTGAGCCCCACCGTGTGGCTGAGCGCC	CAGGAGGGCTCGGCAggcctgagccccaccgtgtggctgagcgccGGATGCGGAGGGTCCGGCGGCCGCTCATCTCGTGCGACATCAAGCTATACTCTAA	348	357	Large envelope protein	http://www.ncbi.nlm.nih.gov/protein/P03142.4	Large envelope protein	http://www.uniprot.org/uniprot/Q76R62	Hepatitis B virus subtype adw	http://purl.obolibrary.org/obo/NCBITaxon_106821	Hepatitis B virus	http://purl.obolibrary.org/obo/NCBITaxon_10407
21139	Linear peptide	GLSPTVWLSV	GGCCTGAGCCCCACCGTGTGGCTGAGCGTG	CAGGAGGGCTCGGCAggcctgagccccaccgtgtggctgagcgtgGGATGCGGAGGGTCCGGCGGCCGCTCATCTCGTGCGACATCAAGCTATACTCTAA	348	357	Large envelope protein	http://www.ncbi.nlm.nih.gov/protein/P03138.3	Large envelope protein	http://www.uniprot.org/uniprot/Q76R62	Hepatitis B virus subtype ayw	http://purl.obolibrary.org/obo/NCBITaxon_10418	Hepatitis B virus	http://purl.obolibrary.org/obo/NCBITaxon_10407	The following refers to the epitope id as found in the original FIMM database: P000030
21145	Linear peptide	GLSRYVARL	GGCCTGAGCAGGTACGTGGCCAGGCTG	CAGGAGGGCTCGGCAggcctgagcaggtacgtggccaggctgGGATGCGGAGGGTCCGGCGGCCGCTCATCTCGTGCGACATCAAGCTATACTCTAATAT	455	463	Protein P	http://www.ncbi.nlm.nih.gov/protein/ACT90735.1	Protein P	http://www.uniprot.org/uniprot/Q69028	Hepatitis B virus	http://purl.obolibrary.org/obo/NCBITaxon_10407	Hepatitis B virus	http://purl.obolibrary.org/obo/NCBITaxon_10407
21199	Linear peptide	GLVILLVLAL	GGCCTGGTGATCCTGCTGGTGCTGGCCCTG	CAGGAGGGCTCGGCAggcctggtgatcctgctggtgctggccctgGGATGCGGAGGGTCCGGCGGCCGCTCATCTCGTGCGACATCAAGCTATACTCTAA	367	376	Circumsporozoite protein, putative	http://www.ncbi.nlm.nih.gov/protein/P08677.2	Circumsporozoite protein, putative	http://www.uniprot.org/uniprot/A5KB63	Plasmodium vivax strain Belem	http://purl.obolibrary.org/obo/NCBITaxon_31273	Plasmodium vivax	http://purl.obolibrary.org/obo/NCBITaxon_5855
21223	Linear peptide	GLYGNGILV	GGCCTGTACGGCAACGGCATCCTGGTG	CAGGAGGGCTCGGCAggcctgtacggcaacggcatcctggtgGGATGCGGAGGGTCCGGCGGCCGCTCATCTCGTGCGACATCAAGCTATACTCTAATAT	1635	1643	Genome polyprotein	http://www.ncbi.nlm.nih.gov/protein/P03314.1	Genome polyprotein	http://www.uniprot.org/uniprot/P03314	Yellow fever virus 17D	http://purl.obolibrary.org/obo/NCBITaxon_11090	Yellow fever virus	http://purl.obolibrary.org/obo/NCBITaxon_11089
21236	Linear peptide	GLYPGLIWL	GGCCTGTACCCCGGCCTGATCTGGCTG	CAGGAGGGCTCGGCAggcctgtaccccggcctgatctggctgGGATGCGGAGGGTCCGGCGGCCGCTCATCTCGTGCGACATCAAGCTATACTCTAATAT	21	29	Interferon regulatory factor 6	http://www.ncbi.nlm.nih.gov/protein/O14896.1	Interferon regulatory factor 6	http://www.uniprot.org/uniprot/O14896	Homo sapiens	http://purl.obolibrary.org/obo/NCBITaxon_9606	Homo sapiens	http://purl.obolibrary.org/obo/NCBITaxon_9606
21241	Linear peptide	GLYSGVTTV	GGCCTGTACAGCGGCGTGACCACCGTG	CAGGAGGGCTCGGCAggcctgtacagcggcgtgaccaccgtgGGATGCGGAGGGTCCGGCGGCCGCTCATCTCGTGCGACATCAAGCTATACTCTAATAT	46	54	Ribonucleoside-diphosphate reductase large subunit	http://www.ncbi.nlm.nih.gov/protein/AAH06498.1	Ribonucleoside-diphosphate reductase large subunit	http://www.uniprot.org/uniprot/P23921	Homo sapiens	http://purl.obolibrary.org/obo/NCBITaxon_9606	Homo sapiens	http://purl.obolibrary.org/obo/NCBITaxon_9606
21255	Linear peptide	GMDPRMCSL	GGCATGGACCCCAGGATGTGCAGCCTG	CAGGAGGGCTCGGCAggcatggaccccaggatgtgcagcctgGGATGCGGAGGGTCCGGCGGCCGCTCATCTCGTGCGACATCAAGCTATACTCTAATAT	158	166	Nucleoprotein	http://www.ncbi.nlm.nih.gov/protein/AAT70629.1	Nucleoprotein	http://www.uniprot.org/uniprot/P03466	H5N1 subtype	http://purl.obolibrary.org/obo/NCBITaxon_102793	Influenza A virus	http://purl.obolibrary.org/obo/NCBITaxon_11320	The authors report that the epitope was synthesized based on strain H5N1-Thailand-human-2004.
21275	Linear peptide	GMGPSLIGL	GGCATGGGCCCCAGCCTGATCGGCCTG	CAGGAGGGCTCGGCAggcatgggccccagcctgatcggcctgGGATGCGGAGGGTCCGGCGGCCGCTCATCTCGTGCGACATCAAGCTATACTCTAATAT	198	206	Diacylglycerol acyltransferase/mycolyltransferase Ag85B	http://www.ncbi.nlm.nih.gov/protein/P31952	Diacylglycerol acyltransferase/mycolyltransferase Ag85B	http://www.uniprot.org/uniprot/P9WQP1	Mycobacterium tuberculosis	http://purl.obolibrary.org/obo/NCBITaxon_1773	Mycobacterium tuberculosis	http://purl.obolibrary.org/obo/NCBITaxon_1773
21297	Linear peptide	GMLGFVFTL	GGCATGCTGGGCTTCGTGTTCACCCTG	CAGGAGGGCTCGGCAggcatgctgggcttcgtgttcaccctgGGATGCGGAGGGTCCGGCGGCCGCTCATCTCGTGCGACATCAAGCTATACTCTAATAT	58	66	Matrix protein 1	http://www.ncbi.nlm.nih.gov/protein/ACF76863.1	Matrix protein 1	http://www.uniprot.org/uniprot/P03485	H5N1 subtype	http://purl.obolibrary.org/obo/NCBITaxon_102793	Influenza A virus	http://purl.obolibrary.org/obo/NCBITaxon_11320
21347	Linear peptide	GMSRIGMEV	GGCATGAGCAGGATCGGCATGGAGGTG	CAGGAGGGCTCGGCAggcatgagcaggatcggcatggaggtgGGATGCGGAGGGTCCGGCGGCCGCTCATCTCGTGCGACATCAAGCTATACTCTAATAT	317	325	Nucleoprotein	http://www.ncbi.nlm.nih.gov/protein/P59595.1	Nucleoprotein	http://www.uniprot.org/uniprot/P59595	SARS coronavirus	http://purl.obolibrary.org/obo/NCBITaxon_227859	SARS-related coronavirus	http://purl.obolibrary.org/obo/NCBITaxon_694009
22738	Linear peptide	GTLGIVCPI	GGCACCCTGGGCATCGTGTGCCCCATC	CAGGAGGGCTCGGCAggcaccctgggcatcgtgtgccccatcGGATGCGGAGGGTCCGGCGGCCGCTCATCTCGTGCGACATCAAGCTATACTCTAATAT	85	93	Protein E7	http://www.ncbi.nlm.nih.gov/protein/ABL96585.1	Protein E7	http://www.uniprot.org/uniprot/P03129	Human papillomavirus type 16	http://purl.obolibrary.org/obo/NCBITaxon_333760	Alphapapillomavirus 9	http://purl.obolibrary.org/obo/NCBITaxon_337041
23129	Linear peptide	GVRVLEDGV	GGCGTGAGGGTGCTGGAGGACGGCGTG	CAGGAGGGCTCGGCAggcgtgagggtgctggaggacggcgtgGGATGCGGAGGGTCCGGCGGCCGCTCATCTCGTGCGACATCAAGCTATACTCTAATAT	154	162	Genome polyprotein	http://www.ncbi.nlm.nih.gov/protein/BAB18806.1	Genome polyprotein	http://www.uniprot.org/uniprot/P27958	Hepatitis C virus subtype 1a	http://purl.obolibrary.org/obo/NCBITaxon_31646	Hepatitis C virus	http://purl.obolibrary.org/obo/NCBITaxon_11103
23214	Linear peptide	GVYDGEEHSV	GGCGTGTACGACGGCGAGGAGCACAGCGTG	CAGGAGGGCTCGGCAggcgtgtacgacggcgaggagcacagcgtgGGATGCGGAGGGTCCGGCGGCCGCTCATCTCGTGCGACATCAAGCTATACTCTAA	231	240	Melanoma-associated antigen B2	http://www.ncbi.nlm.nih.gov/protein/O15479.2	Melanoma-associated antigen B2	http://www.uniprot.org/uniprot/O15479	Homo sapiens	http://purl.obolibrary.org/obo/NCBITaxon_9606	Homo sapiens	http://purl.obolibrary.org/obo/NCBITaxon_9606
24216	Linear peptide	HLGNKYLV	CACCTGGGCAACAAGTACCTGGTG	CAGGAGGGCTCGGCAcacctgggcaacaagtacctggtgGGATGCGGAGGGTCCGGCGGCCGCTCATCTCGTGCGACATCAAGCTATACTCTAATATAGC			Circumsporozoite (CS) protein	https://ontology.iedb.org/ontology/ONTIE_0002612	Circumsporozoite (CS) protein	http://www.uniprot.org/uniprot/Q7K740	Plasmodium falciparum	http://purl.obolibrary.org/obo/NCBITaxon_5833	Plasmodium falciparum	http://purl.obolibrary.org/obo/NCBITaxon_5833
24217	Linear peptide	HLGNVKYLV	CACCTGGGCAACGTGAAGTACCTGGTG	CAGGAGGGCTCGGCAcacctgggcaacgtgaagtacctggtgGGATGCGGAGGGTCCGGCGGCCGCTCATCTCGTGCGACATCAAGCTATACTCTAATAT	3	11	Thrombospondin-related anonymous protein, TRAP	http://www.ncbi.nlm.nih.gov/protein/P16893.1	Thrombospondin-related anonymous protein, TRAP	http://www.uniprot.org/uniprot/Q76NM2	Plasmodium falciparum	http://purl.obolibrary.org/obo/NCBITaxon_5833	Plasmodium falciparum	http://purl.obolibrary.org/obo/NCBITaxon_5833
24256	Linear peptide	HLMIDRPYV	CACCTGATGATCGACAGGCCCTACGTG	CAGGAGGGCTCGGCAcacctgatgatcgacaggccctacgtgGGATGCGGAGGGTCCGGCGGCCGCTCATCTCGTGCGACATCAAGCTATACTCTAATAT	29	37	Hemagglutinin glycoprotein	http://www.ncbi.nlm.nih.gov/protein/P08362.1	Hemagglutinin glycoprotein	http://www.uniprot.org/uniprot/Q786F2	Measles virus strain Edmonston	http://purl.obolibrary.org/obo/NCBITaxon_11235	Measles morbillivirus	http://purl.obolibrary.org/obo/NCBITaxon_11234
24299	Linear peptide	HLSLRGLFV	CACCTGAGCCTGAGGGGCCTGTTCGTG	CAGGAGGGCTCGGCAcacctgagcctgaggggcctgttcgtgGGATGCGGAGGGTCCGGCGGCCGCTCATCTCGTGCGACATCAAGCTATACTCTAATAT	52	60	Protein X	http://www.ncbi.nlm.nih.gov/protein/BAF81690.1	Protein X	http://www.uniprot.org/uniprot/Q69027	Hepatitis B virus	http://purl.obolibrary.org/obo/NCBITaxon_10407	Hepatitis B virus	http://purl.obolibrary.org/obo/NCBITaxon_10407
24302	Linear peptide	HLSLRGLPV	CACCTGAGCCTGAGGGGCCTGCCCGTG	CAGGAGGGCTCGGCAcacctgagcctgaggggcctgcccgtgGGATGCGGAGGGTCCGGCGGCCGCTCATCTCGTGCGACATCAAGCTATACTCTAATAT	52	60	Protein X	http://www.ncbi.nlm.nih.gov/protein/AAP06597.1	Protein X	http://www.uniprot.org/uniprot/Q69027	Hepatitis B virus	http://purl.obolibrary.org/obo/NCBITaxon_10407	Hepatitis B virus	http://purl.obolibrary.org/obo/NCBITaxon_10407
24357	Linear peptide	HMWNFISGI	CACATGTGGAACTTCATCAGCGGCATC	CAGGAGGGCTCGGCAcacatgtggaacttcatcagcggcatcGGATGCGGAGGGTCCGGCGGCCGCTCATCTCGTGCGACATCAAGCTATACTCTAATAT	1764	1772	Genome polyprotein	http://www.ncbi.nlm.nih.gov/protein/P26663.3	Genome polyprotein	http://www.uniprot.org/uniprot/P27958	Hepatitis C virus	http://purl.obolibrary.org/obo/NCBITaxon_11103	Hepatitis C virus	http://purl.obolibrary.org/obo/NCBITaxon_11103	Imported from the TopBank database.
24390	Linear peptide	HNNGICWGN	CACAACAACGGCATCTGCTGGGGCAAC	CAGGAGGGCTCGGCAcacaacaacggcatctgctggggcaacGGATGCGGAGGGTCCGGCGGCCGCTCATCTCGTGCGACATCAAGCTATACTCTAATAT	315	323	Major capsid protein L1 (UniProt:P04012)	http://www.ncbi.nlm.nih.gov/protein/P50816.2	Major capsid protein L1	http://www.uniprot.org/uniprot/P04012	Human papillomavirus type 44	http://purl.obolibrary.org/obo/NCBITaxon_10592	Alphapapillomavirus 10	http://purl.obolibrary.org/obo/NCBITaxon_333754
24536	Linear peptide	HPVGEADYFEY	CACCCCGTGGGCGAGGCCGACTACTTCGAGTAC	CAGGAGGGCTCGGCAcaccccgtgggcgaggccgactacttcgagtacGGATGCGGAGGGTCCGGCGGCCGCTCATCTCGTGCGACATCAAGCTATACTC	407	417	Epstein-Barr nuclear antigen 1	http://www.ncbi.nlm.nih.gov/protein/Q777E1	Epstein-Barr nuclear antigen 1	http://www.uniprot.org/uniprot/P03211	Human gammaherpesvirus 4	http://purl.obolibrary.org/obo/NCBITaxon_10376	Human gammaherpesvirus 4	http://purl.obolibrary.org/obo/NCBITaxon_10376
25026	Linear peptide	HVDGKILFV	CACGTGGACGGCAAGATCCTGTTCGTG	CAGGAGGGCTCGGCAcacgtggacggcaagatcctgttcgtgGGATGCGGAGGGTCCGGCGGCCGCTCATCTCGTGCGACATCAAGCTATACTCTAATAT	204	212	Serine proteinase inhibitor 2	http://www.ncbi.nlm.nih.gov/protein/P20842.1	Serine proteinase inhibitor 2	http://www.uniprot.org/uniprot/P15059	Vaccinia virus Copenhagen	http://purl.obolibrary.org/obo/NCBITaxon_10249	Vaccinia virus	http://purl.obolibrary.org/obo/NCBITaxon_10245
25288	Linear peptide	IAGGVMAVV	ATCGCCGGCGGCGTGATGGCCGTGGTG	CAGGAGGGCTCGGCAatcgccggcggcgtgatggccgtggtgGGATGCGGAGGGTCCGGCGGCCGCTCATCTCGTGCGACATCAAGCTATACTCTAATAT	71	79	Trans-sialidase, putative (UniProt:K4DVP7)	http://www.ncbi.nlm.nih.gov/protein/AAB18265.1	Trans-sialidase, putative	http://www.uniprot.org/uniprot/K4DVP7	Trypanosoma cruzi	http://purl.obolibrary.org/obo/NCBITaxon_5693	Trypanosoma cruzi	http://purl.obolibrary.org/obo/NCBITaxon_5693	Imported from the TopBank database.
25298	Linear peptide	IAGNSAYEYV	ATCGCCGGCAACAGCGCCTACGAGTACGTG	CAGGAGGGCTCGGCAatcgccggcaacagcgcctacgagtacgtgGGATGCGGAGGGTCCGGCGGCCGCTCATCTCGTGCGACATCAAGCTATACTCTAA	620	629	Envelope glycoprotein B	http://www.ncbi.nlm.nih.gov/protein/ABQ23592.1	Envelope glycoprotein B	http://www.uniprot.org/uniprot/F5HB53	Human betaherpesvirus 5	http://purl.obolibrary.org/obo/NCBITaxon_10359	Human betaherpesvirus 5	http://purl.obolibrary.org/obo/NCBITaxon_10359
25370	Linear peptide	IANYNFTLV	ATCGCCAACTACAACTTCACCCTGGTG	CAGGAGGGCTCGGCAatcgccaactacaacttcaccctggtgGGATGCGGAGGGTCCGGCGGCCGCTCATCTCGTGCGACATCAAGCTATACTCTAATAT			Other Trypanosoma cruzi protein	https://ontology.iedb.org/ontology/ONTIE_0002050			Trypanosoma cruzi	http://purl.obolibrary.org/obo/NCBITaxon_5693	Trypanosoma cruzi	http://purl.obolibrary.org/obo/NCBITaxon_5693	The epitope sequence was presumably derived from the nucleotide sequence of a Trans-sialidase pseudogene.
26543	Linear peptide	IIIPFIAYFV	ATCATCATCCCCTTCATCGCCTACTTCGTG	CAGGAGGGCTCGGCAatcatcatccccttcatcgcctacttcgtgGGATGCGGAGGGTCCGGCGGCCGCTCATCTCGTGCGACATCAAGCTATACTCTAA	375	384	Ankyrin repeat protein M1	http://www.ncbi.nlm.nih.gov/protein/P14356.1	Ankyrin repeat protein M1	http://www.uniprot.org/uniprot/P14356	Vaccinia virus	http://purl.obolibrary.org/obo/NCBITaxon_10245	Vaccinia virus	http://purl.obolibrary.org/obo/NCBITaxon_10245
26579	Linear peptide	IILNGSLLTL	ATCATCCTGAACGGCAGCCTGCTGACCCTG	CAGGAGGGCTCGGCAatcatcctgaacggcagcctgctgaccctgGGATGCGGAGGGTCCGGCGGCCGCTCATCTCGTGCGACATCAAGCTATACTCTAA	581	590	Trans-sialidase, putative (UniProt:K4DPA8)	http://www.ncbi.nlm.nih.gov/protein/JH0823	Trans-sialidase, putative	http://www.uniprot.org/uniprot/K4DPA8	Trypanosoma cruzi	http://purl.obolibrary.org/obo/NCBITaxon_5693	Trypanosoma cruzi	http://purl.obolibrary.org/obo/NCBITaxon_5693
26591	Linear peptide	IIMDEAHFL	ATCATCATGGACGAGGCCCACTTCCTG	CAGGAGGGCTCGGCAatcatcatggacgaggcccacttcctgGGATGCGGAGGGTCCGGCGGCCGCTCATCTCGTGCGACATCAAGCTATACTCTAATAT	1770	1778	Genome polyprotein	http://www.ncbi.nlm.nih.gov/protein/P03314.1	Genome polyprotein	http://www.uniprot.org/uniprot/P03314	Yellow fever virus 17D	http://purl.obolibrary.org/obo/NCBITaxon_11090	Yellow fever virus	http://purl.obolibrary.org/obo/NCBITaxon_11089
26954	Linear peptide	ILAGYGAGV	ATCCTGGCCGGCTACGGCGCCGGCGTG	CAGGAGGGCTCGGCAatcctggccggctacggcgccggcgtgGGATGCGGAGGGTCCGGCGGCCGCTCATCTCGTGCGACATCAAGCTATACTCTAATAT	1851	1859	Genome polyprotein	http://www.ncbi.nlm.nih.gov/protein/P26663.3	Genome polyprotein	http://www.uniprot.org/uniprot/P27958	Hepatitis C virus	http://purl.obolibrary.org/obo/NCBITaxon_11103	Hepatitis C virus	http://purl.obolibrary.org/obo/NCBITaxon_11103	Imported from the TopBank database.
26990	Linear peptide	ILDDNLYKV	ATCCTGGACGACAACCTGTACAAGGTG	CAGGAGGGCTCGGCAatcctggacgacaacctgtacaaggtgGGATGCGGAGGGTCCGGCGGCCGCTCATCTCGTGCGACATCAAGCTATACTCTAATAT	18	26	Putative nuclease G5	http://www.ncbi.nlm.nih.gov/protein/AAO89361.1	Putative nuclease G5	http://www.uniprot.org/uniprot/Q80HX0	Vaccinia virus WR	http://purl.obolibrary.org/obo/NCBITaxon_10254	Vaccinia virus	http://purl.obolibrary.org/obo/NCBITaxon_10245
26993	Linear peptide	ILDEERDKV	ATCCTGGACGAGGAGAGGGACAAGGTG	CAGGAGGGCTCGGCAatcctggacgaggagagggacaaggtgGGATGCGGAGGGTCCGGCGGCCGCTCATCTCGTGCGACATCAAGCTATACTCTAATAT	256	264	55 kDa immediate-early protein 1	http://www.ncbi.nlm.nih.gov/protein/AAR31390.1	55 kDa immediate-early protein 1	http://www.uniprot.org/uniprot/F5HCM1	Human betaherpesvirus 5	http://purl.obolibrary.org/obo/NCBITaxon_10359	Human betaherpesvirus 5	http://purl.obolibrary.org/obo/NCBITaxon_10359
27000	Linear peptide	ILDKKVEKV	ATCCTGGACAAGAAGGTGGAGAAGGTG	CAGGAGGGCTCGGCAatcctggacaagaaggtggagaaggtgGGATGCGGAGGGTCCGGCGGCCGCTCATCTCGTGCGACATCAAGCTATACTCTAATAT	570	578	Heat shock protein HSP 90-beta	http://www.ncbi.nlm.nih.gov/protein/P08238.4	Heat shock protein HSP 90-beta	http://www.uniprot.org/uniprot/P08238	Homo sapiens	http://purl.obolibrary.org/obo/NCBITaxon_9606	Homo sapiens	http://purl.obolibrary.org/obo/NCBITaxon_9606
27007	Linear peptide	ILDQKINEV	ATCCTGGACCAGAAGATCAACGAGGTG	CAGGAGGGCTCGGCAatcctggaccagaagatcaacgaggtgGGATGCGGAGGGTCCGGCGGCCGCTCATCTCGTGCGACATCAAGCTATACTCTAATAT	23	31	Ornithine decarboxylase	http://www.ncbi.nlm.nih.gov/protein/P11926.2	Ornithine decarboxylase	http://www.uniprot.org/uniprot/P11926	Homo sapiens	http://purl.obolibrary.org/obo/NCBITaxon_9606	Homo sapiens	http://purl.obolibrary.org/obo/NCBITaxon_9606
27011	Linear peptide	ILDSFDPLV	ATCCTGGACAGCTTCGACCCCCTGGTG	CAGGAGGGCTCGGCAatcctggacagcttcgaccccctggtgGGATGCGGAGGGTCCGGCGGCCGCTCATCTCGTGCGACATCAAGCTATACTCTAATAT	2252	2260	Genome polyprotein	http://www.ncbi.nlm.nih.gov/protein/BAA01582.1	Genome polyprotein	http://www.uniprot.org/uniprot/P27958	Hepatitis C virus	http://purl.obolibrary.org/obo/NCBITaxon_11103	Hepatitis C virus	http://purl.obolibrary.org/obo/NCBITaxon_11103
27012	Linear peptide	ILDSVGIEA	ATCCTGGACAGCGTGGGCATCGAGGCC	CAGGAGGGCTCGGCAatcctggacagcgtgggcatcgaggccGGATGCGGAGGGTCCGGCGGCCGCTCATCTCGTGCGACATCAAGCTATACTCTAATAT	27	35	60S acidic ribosomal protein P2	http://www.ncbi.nlm.nih.gov/protein/2W1O_A	60S acidic ribosomal protein P2	http://www.uniprot.org/uniprot/P05387	Homo sapiens	http://purl.obolibrary.org/obo/NCBITaxon_9606	Homo sapiens	http://purl.obolibrary.org/obo/NCBITaxon_9606
27066	Linear peptide	ILGFVFTLTV	ATCCTGGGCTTCGTGTTCACCCTGACCGTG	CAGGAGGGCTCGGCAatcctgggcttcgtgttcaccctgaccgtgGGATGCGGAGGGTCCGGCGGCCGCTCATCTCGTGCGACATCAAGCTATACTCTAA	59	68	Matrix protein 1	http://www.ncbi.nlm.nih.gov/protein/P03485.1	Matrix protein 1	http://www.uniprot.org/uniprot/P03485	Influenza A virus (A/Puerto Rico/8/1934(H1N1))	http://purl.obolibrary.org/obo/NCBITaxon_211044	Influenza A virus	http://purl.obolibrary.org/obo/NCBITaxon_11320
27096	Linear peptide	ILHTPGCV	ATCCTGCACACCCCCGGCTGCGTG	CAGGAGGGCTCGGCAatcctgcacacccccggctgcgtgGGATGCGGAGGGTCCGGCGGCCGCTCATCTCGTGCGACATCAAGCTATACTCTAATATAGC	220	227	Genome polyprotein	http://www.ncbi.nlm.nih.gov/protein/AAA45676.1	Genome polyprotein	http://www.uniprot.org/uniprot/P27958	Hepatitis C virus (isolate H)	http://purl.obolibrary.org/obo/NCBITaxon_11108	Hepatitis C virus	http://purl.obolibrary.org/obo/NCBITaxon_11103	The following refers to the epitope id as found in the original FIMM database: P000051
27125	Linear peptide	ILKEPVHGV	ATCCTGAAGGAGCCCGTGCACGGCGTG	CAGGAGGGCTCGGCAatcctgaaggagcccgtgcacggcgtgGGATGCGGAGGGTCCGGCGGCCGCTCATCTCGTGCGACATCAAGCTATACTCTAATAT	897	905	Gag-Pol polyprotein	http://www.ncbi.nlm.nih.gov/protein/AAN73817.1	Gag-Pol polyprotein	http://www.uniprot.org/uniprot/P04585	Human immunodeficiency virus 1	http://purl.obolibrary.org/obo/NCBITaxon_11676	Human immunodeficiency virus 1	http://purl.obolibrary.org/obo/NCBITaxon_11676
27144	Linear peptide	ILLAELEQL	ATCCTGCTGGCCGAGCTGGAGCAGCTG	CAGGAGGGCTCGGCAatcctgctggccgagctggagcagctgGGATGCGGAGGGTCCGGCGGCCGCTCATCTCGTGCGACATCAAGCTATACTCTAATAT	130	138	Vimentin	http://www.ncbi.nlm.nih.gov/protein/AAA61279.1	Vimentin	http://www.uniprot.org/uniprot/P08670	Homo sapiens	http://purl.obolibrary.org/obo/NCBITaxon_9606	Homo sapiens	http://purl.obolibrary.org/obo/NCBITaxon_9606
27158	Linear peptide	ILLGSLSDL	ATCCTGCTGGGCAGCCTGAGCGACCTG	CAGGAGGGCTCGGCAatcctgctgggcagcctgagcgacctgGGATGCGGAGGGTCCGGCGGCCGCTCATCTCGTGCGACATCAAGCTATACTCTAATAT	1188	1196	Hantaan orthohantavirus protein	http://www.ncbi.nlm.nih.gov/protein/Q89913			Hantaan orthohantavirus	http://purl.obolibrary.org/obo/NCBITaxon_1980471	Hantaan orthohantavirus	http://purl.obolibrary.org/obo/NCBITaxon_1980471	Data originally imported from the HLA Ligand Database (http://hlaligand.ouhsc.edu/) and recurated. The identical sequence is found in Sin Nombre virus (residues 1189-1197; GenBank no. 38371728).
27182	Linear peptide	ILLNKHIDA	ATCCTGCTGAACAAGCACATCGACGCC	CAGGAGGGCTCGGCAatcctgctgaacaagcacatcgacgccGGATGCGGAGGGTCCGGCGGCCGCTCATCTCGTGCGACATCAAGCTATACTCTAATAT	352	360	Nucleoprotein	http://www.ncbi.nlm.nih.gov/protein/P59595.1	Nucleoprotein	http://www.uniprot.org/uniprot/P59595	SARS coronavirus	http://purl.obolibrary.org/obo/NCBITaxon_227859	SARS-related coronavirus	http://purl.obolibrary.org/obo/NCBITaxon_694009
27195	Linear peptide	ILLWEIPDV	ATCCTGCTGTGGGAGATCCCCGACGTG	CAGGAGGGCTCGGCAatcctgctgtgggagatccccgacgtgGGATGCGGAGGGTCCGGCGGCCGCTCATCTCGTGCGACATCAAGCTATACTCTAATAT	1267	1275	Genome polyprotein	http://www.ncbi.nlm.nih.gov/protein/ABG67747.1	Genome polyprotein	http://www.uniprot.org/uniprot/P14335	West Nile virus	http://purl.obolibrary.org/obo/NCBITaxon_11082	West Nile virus	http://purl.obolibrary.org/obo/NCBITaxon_11082
27201	Linear peptide	ILMEHIHKL	ATCCTGATGGAGCACATCCACAAGCTG	CAGGAGGGCTCGGCAatcctgatggagcacatccacaagctgGGATGCGGAGGGTCCGGCGGCCGCTCATCTCGTGCGACATCAAGCTATACTCTAATAT	137	145	60S ribosomal protein L19	http://www.ncbi.nlm.nih.gov/protein/P84098.1	60S ribosomal protein L19	http://www.uniprot.org/uniprot/P84098	Homo sapiens	http://purl.obolibrary.org/obo/NCBITaxon_9606	Homo sapiens	http://purl.obolibrary.org/obo/NCBITaxon_9606
27202	Linear peptide	ILMIFISSFL	ATCCTGATGATCTTCATCAGCAGCTTCCTG	CAGGAGGGCTCGGCAatcctgatgatcttcatcagcagcttcctgGGATGCGGAGGGTCCGGCGGCCGCTCATCTCGTGCGACATCAAGCTATACTCTAA	81	90	Virion membrane protein A17 precursor	http://www.ncbi.nlm.nih.gov/protein/AAB96468.1	Virion membrane protein A17 precursor	http://www.uniprot.org/uniprot/P68593	Vaccinia virus	http://purl.obolibrary.org/obo/NCBITaxon_10245	Vaccinia virus	http://purl.obolibrary.org/obo/NCBITaxon_10245
27205	Linear peptide	ILMNDQEVGV	ATCCTGATGAACGACCAGGAGGTGGGCGTG	CAGGAGGGCTCGGCAatcctgatgaacgaccaggaggtgggcgtgGGATGCGGAGGGTCCGGCGGCCGCTCATCTCGTGCGACATCAAGCTATACTCTAA	1587	1596	Genome polyprotein	http://www.ncbi.nlm.nih.gov/protein/P03313.4	Genome polyprotein	http://www.uniprot.org/uniprot/P08292	Coxsackievirus B3	http://purl.obolibrary.org/obo/NCBITaxon_12072	Enterovirus B	http://purl.obolibrary.org/obo/NCBITaxon_138949
27217	Linear peptide	ILMWEAVTL	ATCCTGATGTGGGAGGCCGTGACCCTG	CAGGAGGGCTCGGCAatcctgatgtgggaggccgtgaccctgGGATGCGGAGGGTCCGGCGGCCGCTCATCTCGTGCGACATCAAGCTATACTCTAATAT	100	108	Human polyomavirus 2 protein	http://www.ncbi.nlm.nih.gov/protein/AAL37677.1			JC polyomavirus	http://purl.obolibrary.org/obo/NCBITaxon_10632	Human polyomavirus 2	http://purl.obolibrary.org/obo/NCBITaxon_1891763
27234	Linear peptide	ILNNPKASL	ATCCTGAACAACCCCAAGGCCAGCCTG	CAGGAGGGCTCGGCAatcctgaacaaccccaaggccagcctgGGATGCGGAGGGTCCGGCGGCCGCTCATCTCGTGCGACATCAAGCTATACTCTAATAT	303	311	Nucleoprotein	http://www.ncbi.nlm.nih.gov/protein/P03418.1	Nucleoprotein	http://www.uniprot.org/uniprot/O42053	Human respiratory syncytial virus A strain Long	http://purl.obolibrary.org/obo/NCBITaxon_11260	Human orthopneumovirus	http://purl.obolibrary.org/obo/NCBITaxon_11250
27241	Linear peptide	ILPDPLKPT	ATCCTGCCCGACCCCCTGAAGCCCACC	CAGGAGGGCTCGGCAatcctgcccgaccccctgaagcccaccGGATGCGGAGGGTCCGGCGGCCGCTCATCTCGTGCGACATCAAGCTATACTCTAATAT	787	795	Spike glycoprotein	http://www.ncbi.nlm.nih.gov/protein/P59594.1	Spike glycoprotein	http://www.uniprot.org/uniprot/P59594	SARS coronavirus	http://purl.obolibrary.org/obo/NCBITaxon_227859	SARS-related coronavirus	http://purl.obolibrary.org/obo/NCBITaxon_694009
27245	Linear peptide	ILPGQDLQYV	ATCCTGCCCGGCCAGGACCTGCAGTACGTG	CAGGAGGGCTCGGCAatcctgcccggccaggacctgcagtacgtgGGATGCGGAGGGTCCGGCGGCCGCTCATCTCGTGCGACATCAAGCTATACTCTAA	516	525	Hemagglutinin glycoprotein	http://www.ncbi.nlm.nih.gov/protein/ACO37607.1	Hemagglutinin glycoprotein	http://www.uniprot.org/uniprot/Q786F2	Measles morbillivirus	http://purl.obolibrary.org/obo/NCBITaxon_11234	Measles morbillivirus	http://purl.obolibrary.org/obo/NCBITaxon_11234	The epitope sequence was cited in Oh et al. Virology. 2006 Sep 1;352(2):390-9. Epub 2006 Jun 15 [PMID:16781760].
27251	Linear peptide	ILPSKSLEV	ATCCTGCCCAGCAAGAGCCTGGAGGTG	CAGGAGGGCTCGGCAatcctgcccagcaagagcctggaggtgGGATGCGGAGGGTCCGGCGGCCGCTCATCTCGTGCGACATCAAGCTATACTCTAATAT	512	520	Hantaan orthohantavirus protein	http://www.ncbi.nlm.nih.gov/protein/Q89913			Hantaan orthohantavirus	http://purl.obolibrary.org/obo/NCBITaxon_1980471	Hantaan orthohantavirus	http://purl.obolibrary.org/obo/NCBITaxon_1980471	Data originally imported from the HLA Ligand Database (http://hlaligand.ouhsc.edu/) and recurated. The identical sequence is found in Sin Nombre virus (residues 513-521; GenBank no. 38371728).
27258	Linear peptide	ILQDGRIFI	ATCCTGCAGGACGGCAGGATCTTCATC	CAGGAGGGCTCGGCAatcctgcaggacggcaggatcttcatcGGATGCGGAGGGTCCGGCGGCCGCTCATCTCGTGCGACATCAAGCTATACTCTAATAT	13	21	Small nuclear ribonucleoprotein-associated proteins B and B'	http://www.ncbi.nlm.nih.gov/protein/AAA36579.1	Small nuclear ribonucleoprotein-associated proteins B and B'	http://www.uniprot.org/uniprot/P14678	Homo sapiens	http://purl.obolibrary.org/obo/NCBITaxon_9606	Homo sapiens	http://purl.obolibrary.org/obo/NCBITaxon_9606
27259	Linear peptide	ILQDMRNTI	ATCCTGCAGGACATGAGGAACACCATC	CAGGAGGGCTCGGCAatcctgcaggacatgaggaacaccatcGGATGCGGAGGGTCCGGCGGCCGCTCATCTCGTGCGACATCAAGCTATACTCTAATAT	334	342	Hantaan orthohantavirus protein	http://www.ncbi.nlm.nih.gov/protein/P05133.1			Hantaan orthohantavirus	http://purl.obolibrary.org/obo/NCBITaxon_1980471	Hantaan orthohantavirus	http://purl.obolibrary.org/obo/NCBITaxon_1980471	Data originally imported from the HLA Ligand Database (http://hlaligand.ouhsc.edu/) and recurated. The identical sequence is found in Sin Nombre virus (residues 333-341; GenBank no. 38371728).
27314	Linear peptide	ILSDENYLL	ATCCTGAGCGACGAGAACTACCTGCTG	CAGGAGGGCTCGGCAatcctgagcgacgagaactacctgctgGGATGCGGAGGGTCCGGCGGCCGCTCATCTCGTGCGACATCAAGCTATACTCTAATAT	172	180	Protein A6	http://www.ncbi.nlm.nih.gov/protein/AAO89404.1	Protein A6	http://www.uniprot.org/uniprot/P29192	Vaccinia virus WR	http://purl.obolibrary.org/obo/NCBITaxon_10254	Vaccinia virus	http://purl.obolibrary.org/obo/NCBITaxon_10245
27345	Linear peptide	ILSPFLPLL	ATCCTGAGCCCCTTCCTGCCCCTGCTG	CAGGAGGGCTCGGCAatcctgagccccttcctgcccctgctgGGATGCGGAGGGTCCGGCGGCCGCTCATCTCGTGCGACATCAAGCTATACTCTAATAT	371	379	Large envelope protein	http://www.ncbi.nlm.nih.gov/protein/P03138.3	Large envelope protein	http://www.uniprot.org/uniprot/Q76R62	Hepatitis B virus subtype ayw	http://purl.obolibrary.org/obo/NCBITaxon_10418	Hepatitis B virus	http://purl.obolibrary.org/obo/NCBITaxon_10407
27369	Linear peptide	ILSVSSFLFV	ATCCTGAGCGTGAGCAGCTTCCTGTTCGTG	CAGGAGGGCTCGGCAatcctgagcgtgagcagcttcctgttcgtgGGATGCGGAGGGTCCGGCGGCCGCTCATCTCGTGCGACATCAAGCTATACTCTAA	7	16	Circumsporozoite (CS) protein	http://www.ncbi.nlm.nih.gov/protein/P02893.1	Circumsporozoite (CS) protein	http://www.uniprot.org/uniprot/Q7K740	Plasmodium falciparum 7G8	http://purl.obolibrary.org/obo/NCBITaxon_57266	Plasmodium falciparum	http://purl.obolibrary.org/obo/NCBITaxon_5833	Data originally imported from the HLA Ligand Database and recurated.
27377	Linear peptide	ILTDITKGV	ATCCTGACCGACATCACCAAGGGCGTG	CAGGAGGGCTCGGCAatcctgaccgacatcaccaagggcgtgGGATGCGGAGGGTCCGGCGGCCGCTCATCTCGTGCGACATCAAGCTATACTCTAATAT	161	169	Elongation factor 2	http://www.ncbi.nlm.nih.gov/protein/AAA50388.1	Elongation factor 2	http://www.uniprot.org/uniprot/P13639	Homo sapiens	http://purl.obolibrary.org/obo/NCBITaxon_9606	Homo sapiens	http://purl.obolibrary.org/obo/NCBITaxon_9606
27387	Linear peptide	ILTVILGVL	ATCCTGACCGTGATCCTGGGCGTGCTG	CAGGAGGGCTCGGCAatcctgaccgtgatcctgggcgtgctgGGATGCGGAGGGTCCGGCGGCCGCTCATCTCGTGCGACATCAAGCTATACTCTAATAT	32	40	Melanoma antigen recognized by T-cells 1	http://www.ncbi.nlm.nih.gov/protein/Q16655.1	Melanoma antigen recognized by T-cells 1	http://www.uniprot.org/uniprot/Q16655	Homo sapiens	http://purl.obolibrary.org/obo/NCBITaxon_9606	Homo sapiens	http://purl.obolibrary.org/obo/NCBITaxon_9606
27467	Linear peptide	IMDKNIILKA	ATCATGGACAAGAACATCATCCTGAAGGCC	CAGGAGGGCTCGGCAatcatggacaagaacatcatcctgaaggccGGATGCGGAGGGTCCGGCGGCCGCTCATCTCGTGCGACATCAAGCTATACTCTAA	123	132	Non-structural protein 1	http://www.ncbi.nlm.nih.gov/protein/P17042.1	Non-structural protein 1	http://www.uniprot.org/uniprot/P03496	H1N1 subtype	http://purl.obolibrary.org/obo/NCBITaxon_114727	Influenza A virus	http://purl.obolibrary.org/obo/NCBITaxon_11320
27469	Linear peptide	IMDQVPFSV	ATCATGGACCAGGTGCCCTTCAGCGTG	CAGGAGGGCTCGGCAatcatggaccaggtgcccttcagcgtgGGATGCGGAGGGTCCGGCGGCCGCTCATCTCGTGCGACATCAAGCTATACTCTAATAT	209	217	melanoma antigen gp100	http://www.ncbi.nlm.nih.gov/protein/AAB31176.1	Melanocyte protein PMEL	http://www.uniprot.org/uniprot/P40967	Homo sapiens	http://purl.obolibrary.org/obo/NCBITaxon_9606	Homo sapiens	http://purl.obolibrary.org/obo/NCBITaxon_9606	The epitope sequence was provided in cited reference Carreno et al. J Clin Invest 2013;123:3383 [PMID: 23867552].	analog
27477	Linear peptide	IMELATAGI	ATCATGGAGCTGGCCACCGCCGGCATC	CAGGAGGGCTCGGCAatcatggagctggccaccgccggcatcGGATGCGGAGGGTCCGGCGGCCGCTCATCTCGTGCGACATCAAGCTATACTCTAATAT	1273	1281	Hantaan orthohantavirus protein	http://www.ncbi.nlm.nih.gov/protein/Q89913			Hantaan orthohantavirus	http://purl.obolibrary.org/obo/NCBITaxon_1980471	Hantaan orthohantavirus	http://purl.obolibrary.org/obo/NCBITaxon_1980471	Data originally imported from the HLA Ligand Database (http://hlaligand.ouhsc.edu/) and recurated. The identical sequence is found in Sin Nombre virus (residues 1274-1282; GenBank no. 38371728).
27500	Linear peptide	IMIGHLVGV	ATCATGATCGGCCACCTGGTGGGCGTG	CAGGAGGGCTCGGCAatcatgatcggccacctggtgggcgtgGGATGCGGAGGGTCCGGCGGCCGCTCATCTCGTGCGACATCAAGCTATACTCTAATAT											Imported from the TopBank database. This peptide is studied as an analog of the naturally occuring peptide IMIGVLVGV
27501	Linear peptide	IMIGVLVGV	ATCATGATCGGCGTGCTGGTGGGCGTG	CAGGAGGGCTCGGCAatcatgatcggcgtgctggtgggcgtgGGATGCGGAGGGTCCGGCGGCCGCTCATCTCGTGCGACATCAAGCTATACTCTAATAT	691	699	Carcinoembryonic antigen-related cell adhesion molecule 5	http://www.ncbi.nlm.nih.gov/protein/P06731.2	Carcinoembryonic antigen-related cell adhesion molecule 5	http://www.uniprot.org/uniprot/P06731	Homo sapiens	http://purl.obolibrary.org/obo/NCBITaxon_9606	Homo sapiens	http://purl.obolibrary.org/obo/NCBITaxon_9606	Imported from the TopBank database.
27513	Linear peptide	IMLEALERV	ATCATGCTGGAGGCCCTGGAGAGGGTG	CAGGAGGGCTCGGCAatcatgctggaggccctggagagggtgGGATGCGGAGGGTCCGGCGGCCGCTCATCTCGTGCGACATCAAGCTATACTCTAATAT	68	76	Small nuclear ribonucleoprotein G (UniProt:P62308)	http://www.ncbi.nlm.nih.gov/protein/NP_003087.1	Small nuclear ribonucleoprotein G	http://www.uniprot.org/uniprot/P62308	Homo sapiens	http://purl.obolibrary.org/obo/NCBITaxon_9606	Homo sapiens	http://purl.obolibrary.org/obo/NCBITaxon_9606
27525	Linear peptide	IMMGVLVGV	ATCATGATGGGCGTGCTGGTGGGCGTG	CAGGAGGGCTCGGCAatcatgatgggcgtgctggtgggcgtgGGATGCGGAGGGTCCGGCGGCCGCTCATCTCGTGCGACATCAAGCTATACTCTAATAT											Imported from the TopBank database. This peptide is studied as an analog of the naturally occuring peptide IMIGVLVGV
27564	Linear peptide	IMSSFEFQV	ATCATGAGCAGCTTCGAGTTCCAGGTG	CAGGAGGGCTCGGCAatcatgagcagcttcgagttccaggtgGGATGCGGAGGGTCCGGCGGCCGCTCATCTCGTGCGACATCAAGCTATACTCTAATAT	686	694	LPS-assembly protein LptD	http://www.ncbi.nlm.nih.gov/protein/YP_169505.1	LPS-assembly protein LptD	http://www.uniprot.org/uniprot/Q5NHI7	Francisella tularensis subsp. tularensis SCHU S4	http://purl.obolibrary.org/obo/NCBITaxon_177416	Francisella tularensis	http://purl.obolibrary.org/obo/NCBITaxon_263
27578	Linear peptide	IMVLSFLFL	ATCATGGTGCTGAGCTTCCTGTTCCTG	CAGGAGGGCTCGGCAatcatggtgctgagcttcctgttcctgGGATGCGGAGGGTCCGGCGGCCGCTCATCTCGTGCGACATCAAGCTATACTCTAATAT	403	411	Circumsporozoite (CS) protein	http://www.ncbi.nlm.nih.gov/protein/P02893.1	Circumsporozoite (CS) protein	http://www.uniprot.org/uniprot/Q7K740	Plasmodium falciparum 7G8	http://purl.obolibrary.org/obo/NCBITaxon_57266	Plasmodium falciparum	http://purl.obolibrary.org/obo/NCBITaxon_5833	Data originally imported from the HLA Ligand Database and recurated.
27586	Linear peptide	IMYNYPAML	ATCATGTACAACTACCCCGCCATGCTG	CAGGAGGGCTCGGCAatcatgtacaactaccccgccatgctgGGATGCGGAGGGTCCGGCGGCCGCTCATCTCGTGCGACATCAAGCTATACTCTAATAT	4	12	ESAT-6-like protein EsxH	http://www.ncbi.nlm.nih.gov/protein/P0A568.2	ESAT-6-like protein EsxH	http://www.uniprot.org/uniprot/P9WNK3	Mycobacterium tuberculosis	http://purl.obolibrary.org/obo/NCBITaxon_1773	Mycobacterium tuberculosis	http://purl.obolibrary.org/obo/NCBITaxon_1773
28864	Linear peptide	ITDQVPFSV	ATCACCGACCAGGTGCCCTTCAGCGTG	CAGGAGGGCTCGGCAatcaccgaccaggtgcccttcagcgtgGGATGCGGAGGGTCCGGCGGCCGCTCATCTCGTGCGACATCAAGCTATACTCTAATAT	209	217	Melanocyte protein PMEL	http://www.ncbi.nlm.nih.gov/protein/AAB31176.1	Melanocyte protein PMEL	http://www.uniprot.org/uniprot/P40967	Homo sapiens	http://purl.obolibrary.org/obo/NCBITaxon_9606	Homo sapiens	http://purl.obolibrary.org/obo/NCBITaxon_9606
29304	Linear peptide	IVIEAIHTV	ATCGTGATCGAGGCCATCCACACCGTG	CAGGAGGGCTCGGCAatcgtgatcgaggccatccacaccgtgGGATGCGGAGGGTCCGGCGGCCGCTCATCTCGTGCGACATCAAGCTATACTCTAATAT	187	195	Thymidylate kinase	http://www.ncbi.nlm.nih.gov/protein/CAM58346.1	Thymidylate kinase	http://www.uniprot.org/uniprot/Q80HT9	Vaccinia virus Ankara	http://purl.obolibrary.org/obo/NCBITaxon_126794	Vaccinia virus	http://purl.obolibrary.org/obo/NCBITaxon_10245
29455	Linear peptide	IVSPFIPLL	ATCGTGAGCCCCTTCATCCCCCTGCTG	CAGGAGGGCTCGGCAatcgtgagccccttcatccccctgctgGGATGCGGAGGGTCCGGCGGCCGCTCATCTCGTGCGACATCAAGCTATACTCTAATAT	382	390	Large envelope protein	http://www.ncbi.nlm.nih.gov/protein/P03141.3	Large envelope protein	http://www.uniprot.org/uniprot/Q76R62	Hepatitis B virus subtype adw2	http://purl.obolibrary.org/obo/NCBITaxon_10408	Hepatitis B virus	http://purl.obolibrary.org/obo/NCBITaxon_10407
30968	Linear peptide	KGILGFVFTLTV	AAGGGCATCCTGGGCTTCGTGTTCACCCTGACCGTG	CAGGAGGGCTCGGCAaagggcatcctgggcttcgtgttcaccctgaccgtgGGATGCGGAGGGTCCGGCGGCCGCTCATCTCGTGCGACATCAAGCTATA	57	68	Matrix protein 1	http://www.ncbi.nlm.nih.gov/protein/P03485.1	Matrix protein 1	http://www.uniprot.org/uniprot/P03485	Influenza A virus	http://purl.obolibrary.org/obo/NCBITaxon_11320	Influenza A virus	http://purl.obolibrary.org/obo/NCBITaxon_11320
31209	Linear peptide	KIDYYIPYV	AAGATCGACTACTACATCCCCTACGTG	CAGGAGGGCTCGGCAaagatcgactactacatcccctacgtgGGATGCGGAGGGTCCGGCGGCCGCTCATCTCGTGCGACATCAAGCTATACTCTAATAT	249	257	Protein E2	http://www.ncbi.nlm.nih.gov/protein/P21080.1	Protein E2	http://www.uniprot.org/uniprot/P21604	Vaccinia virus Copenhagen	http://purl.obolibrary.org/obo/NCBITaxon_10249	Vaccinia virus	http://purl.obolibrary.org/obo/NCBITaxon_10245
31210	Linear peptide	KIEDLINQL	AAGATCGAGGACCTGATCAACCAGCTG	CAGGAGGGCTCGGCAaagatcgaggacctgatcaaccagctgGGATGCGGAGGGTCCGGCGGCCGCTCATCTCGTGCGACATCAAGCTATACTCTAATAT	155	163	Telomere-binding protein I1	http://www.ncbi.nlm.nih.gov/protein/P20498.1	Telomere-binding protein I1	http://www.uniprot.org/uniprot/P16714	Vaccinia virus Copenhagen	http://purl.obolibrary.org/obo/NCBITaxon_10249	Vaccinia virus	http://purl.obolibrary.org/obo/NCBITaxon_10245
31235	Linear peptide	KIFGSLAFL	AAGATCTTCGGCAGCCTGGCCTTCCTG	CAGGAGGGCTCGGCAaagatcttcggcagcctggccttcctgGGATGCGGAGGGTCCGGCGGCCGCTCATCTCGTGCGACATCAAGCTATACTCTAATAT	93	101	Receptor tyrosine-protein kinase erbB-2	http://www.ncbi.nlm.nih.gov/protein/BAG62073.1	Receptor tyrosine-protein kinase erbB-2	http://www.uniprot.org/uniprot/P04626	Homo sapiens	http://purl.obolibrary.org/obo/NCBITaxon_9606	Homo sapiens	http://purl.obolibrary.org/obo/NCBITaxon_9606
31337	Linear peptide	KILSVFFLA	AAGATCCTGAGCGTGTTCTTCCTGGCC	CAGGAGGGCTCGGCAaagatcctgagcgtgttcttcctggccGGATGCGGAGGGTCCGGCGGCCGCTCATCTCGTGCGACATCAAGCTATACTCTAATAT	2	10	Circumsporozoite-related antigen	http://www.ncbi.nlm.nih.gov/protein/P04923.2	Circumsporozoite-related antigen	http://www.uniprot.org/uniprot/Q8IIF0	Plasmodium falciparum	http://purl.obolibrary.org/obo/NCBITaxon_5833	Plasmodium falciparum	http://purl.obolibrary.org/obo/NCBITaxon_5833	Imported from the TopBank database (internal database of LIAI) and recurated.
31364	Linear peptide	KINIFMAFL	AAGATCAACATCTTCATGGCCTTCCTG	CAGGAGGGCTCGGCAaagatcaacatcttcatggccttcctgGGATGCGGAGGGTCCGGCGGCCGCTCATCTCGTGCGACATCAAGCTATACTCTAATAT	251	259	Late transcription factor 1	http://www.ncbi.nlm.nih.gov/protein/AAO89365.1	Late transcription factor 1	http://www.uniprot.org/uniprot/P68613	Vaccinia virus WR	http://purl.obolibrary.org/obo/NCBITaxon_10254	Vaccinia virus	http://purl.obolibrary.org/obo/NCBITaxon_10245
31747	Linear peptide	KLAEAIFKL	AAGCTGGCCGAGGCCATCTTCAAGCTG	CAGGAGGGCTCGGCAaagctggccgaggccatcttcaagctgGGATGCGGAGGGTCCGGCGGCCGCTCATCTCGTGCGACATCAAGCTATACTCTAATAT	3054	3062	Genome polyprotein	http://www.ncbi.nlm.nih.gov/protein/P29990.1	Genome polyprotein	http://www.uniprot.org/uniprot/P17763	Dengue virus 2 Thailand/16681/84	http://purl.obolibrary.org/obo/NCBITaxon_31634	Dengue virus	http://purl.obolibrary.org/obo/NCBITaxon_12637
31749	Linear peptide	KLAGGVAVI	AAGCTGGCCGGCGGCGTGGCCGTGATC	CAGGAGGGCTCGGCAaagctggccggcggcgtggccgtgatcGGATGCGGAGGGTCCGGCGGCCGCTCATCTCGTGCGACATCAAGCTATACTCTAATAT	369	377	60 kDa chaperonin 2 (UniProt:P9WPE7)	http://www.ncbi.nlm.nih.gov/protein/P06806	60 kDa chaperonin 2	http://www.uniprot.org/uniprot/P9WPE7	Mycobacterium tuberculosis	http://purl.obolibrary.org/obo/NCBITaxon_1773	Mycobacterium tuberculosis	http://purl.obolibrary.org/obo/NCBITaxon_1773
31777	Linear peptide	KLCTFSFLI	AAGCTGTGCACCTTCAGCTTCCTGATC	CAGGAGGGCTCGGCAaagctgtgcaccttcagcttcctgatcGGATGCGGAGGGTCCGGCGGCCGCTCATCTCGTGCGACATCAAGCTATACTCTAATAT	216	224	Human polyomavirus 1 protein	http://www.ncbi.nlm.nih.gov/protein/AAT47414.1			Human polyomavirus 1	http://purl.obolibrary.org/obo/NCBITaxon_1891762	Human polyomavirus 1	http://purl.obolibrary.org/obo/NCBITaxon_1891762
31802	Linear peptide	KLEDENPWL	AAGCTGGAGGACGAGAACCCCTGGCTG	CAGGAGGGCTCGGCAaagctggaggacgagaacccctggctgGGATGCGGAGGGTCCGGCGGCCGCTCATCTCGTGCGACATCAAGCTATACTCTAATAT	43	51	Large delta antigen	http://www.ncbi.nlm.nih.gov/protein/AAG26087.1	Large delta antigen	http://www.uniprot.org/uniprot/P29996	Hepatitis delta virus TW2667	https://ontology.iedb.org/ontology/ONTIE_0000432	Hepatitis delta virus	http://purl.obolibrary.org/obo/NCBITaxon_12475
31803	Linear peptide	KLEDLERDL	AAGCTGGAGGACCTGGAGAGGGACCTG	CAGGAGGGCTCGGCAaagctggaggacctggagagggacctgGGATGCGGAGGGTCCGGCGGCCGCTCATCTCGTGCGACATCAAGCTATACTCTAATAT	26	34	Large delta antigen	http://www.ncbi.nlm.nih.gov/protein/AAG26087.1	Large delta antigen	http://www.uniprot.org/uniprot/P29996	Hepatitis delta virus TW2667	https://ontology.iedb.org/ontology/ONTIE_0000432	Hepatitis delta virus	http://purl.obolibrary.org/obo/NCBITaxon_12475
31858	Linear peptide	KLFPEVIDL	AAGCTGTTCCCCGAGGTGATCGACCTG	CAGGAGGGCTCGGCAaagctgttccccgaggtgatcgacctgGGATGCGGAGGGTCCGGCGGCCGCTCATCTCGTGCGACATCAAGCTATACTCTAATAT	89	97	Trans-sialidase, putative (UniProt:K4E505)	http://www.ncbi.nlm.nih.gov/protein/AAA30259.1	Trans-sialidase, putative	http://www.uniprot.org/uniprot/K4E505	Trypanosoma cruzi	http://purl.obolibrary.org/obo/NCBITaxon_5693	Trypanosoma cruzi	http://purl.obolibrary.org/obo/NCBITaxon_5693	Imported from the TopBank database.
31866	Linear peptide	KLFTHDIML	AAGCTGTTCACCCACGACATCATGCTG	CAGGAGGGCTCGGCAaagctgttcacccacgacatcatgctgGGATGCGGAGGGTCCGGCGGCCGCTCATCTCGTGCGACATCAAGCTATACTCTAATAT	62	70	mRNA-capping enzyme regulatory subunit	http://www.ncbi.nlm.nih.gov/protein/CAM58287.1	mRNA-capping enzyme regulatory subunit	http://www.uniprot.org/uniprot/P04318	Vaccinia virus Ankara	http://purl.obolibrary.org/obo/NCBITaxon_126794	Vaccinia virus	http://purl.obolibrary.org/obo/NCBITaxon_10245
31878	Linear peptide	KLGEFYNQM	AAGCTGGGCGAGTTCTACAACCAGATG	CAGGAGGGCTCGGCAaagctgggcgagttctacaaccagatgGGATGCGGAGGGTCCGGCGGCCGCTCATCTCGTGCGACATCAAGCTATACTCTAATAT	85	93	Nucleoprotein	http://www.ncbi.nlm.nih.gov/protein/AAD29162.1	Nucleoprotein	http://www.uniprot.org/uniprot/P04665	Influenza B virus	http://purl.obolibrary.org/obo/NCBITaxon_11520	Influenza B virus	http://purl.obolibrary.org/obo/NCBITaxon_11520	This is the minimal epitope of a CTL line grown from the peripheral blood lymphocytes of an individual (AT) primed with influenza B virus (HongKong, 73) and restimulated with a 13-mer peptide (MVVKLGEFYNQMM).
31884	Linear peptide	KLGGYVSFV	AAGCTGGGCGGCTACGTGAGCTTCGTG	CAGGAGGGCTCGGCAaagctgggcggctacgtgagcttcgtgGGATGCGGAGGGTCCGGCGGCCGCTCATCTCGTGCGACATCAAGCTATACTCTAATAT	125	133	HAD super, subIIIB family protein (UniProt:Q5NH51)	http://www.ncbi.nlm.nih.gov/protein/YP_169641.1	HAD super, subIIIB family protein	http://www.uniprot.org/uniprot/Q5NH51	Francisella tularensis subsp. tularensis SCHU S4	http://purl.obolibrary.org/obo/NCBITaxon_177416	Francisella tularensis	http://purl.obolibrary.org/obo/NCBITaxon_263
31896	Linear peptide	KLHEEEIQEL	AAGCTGCACGAGGAGGAGATCCAGGAGCTG	CAGGAGGGCTCGGCAaagctgcacgaggaggagatccaggagctgGGATGCGGAGGGTCCGGCGGCCGCTCATCTCGTGCGACATCAAGCTATACTCTAA	236	245	Vimentin	http://www.ncbi.nlm.nih.gov/protein/P08670.4	Vimentin	http://www.uniprot.org/uniprot/P08670	Homo sapiens	http://purl.obolibrary.org/obo/NCBITaxon_9606	Homo sapiens	http://purl.obolibrary.org/obo/NCBITaxon_9606
31902	Linear peptide	KLIANNTRV	AAGCTGATCGCCAACAACACCAGGGTG	CAGGAGGGCTCGGCAaagctgatcgccaacaacaccagggtgGGATGCGGAGGGTCCGGCGGCCGCTCATCTCGTGCGACATCAAGCTATACTCTAATAT	242	250	Diacylglycerol acyltransferase/mycolyltransferase Ag85A (UniProt:P9WQP3)	http://www.ncbi.nlm.nih.gov/protein/P0A4V2.1	Diacylglycerol acyltransferase/mycolyltransferase Ag85A	http://www.uniprot.org/uniprot/P9WQP3	Mycobacterium tuberculosis H37Rv	http://purl.obolibrary.org/obo/NCBITaxon_83332	Mycobacterium tuberculosis	http://purl.obolibrary.org/obo/NCBITaxon_1773
31931	Linear peptide	KLKDVLLQV	AAGCTGAAGGACGTGCTGCTGCAGGTG	CAGGAGGGCTCGGCAaagctgaaggacgtgctgctgcaggtgGGATGCGGAGGGTCCGGCGGCCGCTCATCTCGTGCGACATCAAGCTATACTCTAATAT	1130	1138	Myosin-9	http://www.ncbi.nlm.nih.gov/protein/AAA36349.1	Myosin-9	http://www.uniprot.org/uniprot/P35579	Homo sapiens	http://purl.obolibrary.org/obo/NCBITaxon_9606	Homo sapiens	http://purl.obolibrary.org/obo/NCBITaxon_9606
31935	Linear peptide	KLKEFIPKV	AAGCTGAAGGAGTTCATCCCCAAGGTG	CAGGAGGGCTCGGCAaagctgaaggagttcatccccaaggtgGGATGCGGAGGGTCCGGCGGCCGCTCATCTCGTGCGACATCAAGCTATACTCTAATAT	705	713	Merozoite surface protein 1	http://www.ncbi.nlm.nih.gov/protein/AAA29611.1	Merozoite surface protein 1	http://www.uniprot.org/uniprot/Q8I0U8	Plasmodium falciparum	http://purl.obolibrary.org/obo/NCBITaxon_5833	Plasmodium falciparum	http://purl.obolibrary.org/obo/NCBITaxon_5833
31941	Linear peptide	KLKKIKNSI	AAGCTGAAGAAGATCAAGAACAGCATC	CAGGAGGGCTCGGCAaagctgaagaagatcaagaacagcatcGGATGCGGAGGGTCCGGCGGCCGCTCATCTCGTGCGACATCAAGCTATACTCTAATAT			Circumsporozoite (CS) protein	https://ontology.iedb.org/ontology/ONTIE_0002612	Circumsporozoite (CS) protein	http://www.uniprot.org/uniprot/Q7K740	Plasmodium falciparum 7G8	http://purl.obolibrary.org/obo/NCBITaxon_57266	Plasmodium falciparum	http://purl.obolibrary.org/obo/NCBITaxon_5833	Data originally imported from the HLA Ligand Database and recurated. The epitope is based on the sequence YLKKIKNSI from the circumsporozoite protein of Plasmodium falciparum 7G8 strain (Swiss-Prot. record P02893).
31942	Linear peptide	KLKKIKNSL	AAGCTGAAGAAGATCAAGAACAGCCTG	CAGGAGGGCTCGGCAaagctgaagaagatcaagaacagcctgGGATGCGGAGGGTCCGGCGGCCGCTCATCTCGTGCGACATCAAGCTATACTCTAATAT	334	342	Circumsporozoite protein precursor	http://www.ncbi.nlm.nih.gov/protein/P02893.1	Circumsporozoite (CS) protein	http://www.uniprot.org/uniprot/Q7K740	Plasmodium falciparum	http://purl.obolibrary.org/obo/NCBITaxon_5833	Plasmodium falciparum	http://purl.obolibrary.org/obo/NCBITaxon_5833	Data originally imported from the HLA Ligand Database and recurated. The epitope is based on the sequence YLKKIKNSI from the circumsporozoite protein of Plasmodium falciparum 7G8 strain (Swiss-Prot. record P02893).	analog
31967	Linear peptide	KLLEGEEERL	AAGCTGCTGGAGGGCGAGGAGGAGAGGCTG	CAGGAGGGCTCGGCAaagctgctggagggcgaggaggagaggctgGGATGCGGAGGGTCCGGCGGCCGCTCATCTCGTGCGACATCAAGCTATACTCTAA	379	388	Lamin-B1	http://www.ncbi.nlm.nih.gov/protein/P20700.2	Lamin-B1	http://www.uniprot.org/uniprot/P20700	Homo sapiens	http://purl.obolibrary.org/obo/NCBITaxon_9606	Homo sapiens	http://purl.obolibrary.org/obo/NCBITaxon_9606
31968	Linear peptide	KLLEGEESRI	AAGCTGCTGGAGGGCGAGGAGAGCAGGATC	CAGGAGGGCTCGGCAaagctgctggagggcgaggagagcaggatcGGATGCGGAGGGTCCGGCGGCCGCTCATCTCGTGCGACATCAAGCTATACTCTAA	402	411	Vimentin	http://www.ncbi.nlm.nih.gov/protein/P08670.4	Vimentin	http://www.uniprot.org/uniprot/P08670	Homo sapiens	http://purl.obolibrary.org/obo/NCBITaxon_9606	Homo sapiens	http://purl.obolibrary.org/obo/NCBITaxon_9606
31974	Linear peptide	KLLGQINLV	AAGCTGCTGGGCCAGATCAACCTGGTG	CAGGAGGGCTCGGCAaagctgctgggccagatcaacctggtgGGATGCGGAGGGTCCGGCGGCCGCTCATCTCGTGCGACATCAAGCTATACTCTAATAT	90	98	Other Francisella tularensis protein	http://www.ncbi.nlm.nih.gov/protein/YP_169584.1			Francisella tularensis subsp. tularensis SCHU S4	http://purl.obolibrary.org/obo/NCBITaxon_177416	Francisella tularensis	http://purl.obolibrary.org/obo/NCBITaxon_263
31997	Linear peptide	KLLPEGYWV	AAGCTGCTGCCCGAGGGCTACTGGGTG	CAGGAGGGCTCGGCAaagctgctgcccgagggctactgggtgGGATGCGGAGGGTCCGGCGGCCGCTCATCTCGTGCGACATCAAGCTATACTCTAATAT	34	42	Other Francisella tularensis protein	http://www.ncbi.nlm.nih.gov/protein/YP_169522.1			Francisella tularensis subsp. tularensis SCHU S4	http://purl.obolibrary.org/obo/NCBITaxon_177416	Francisella tularensis	http://purl.obolibrary.org/obo/NCBITaxon_263
32069	Linear peptide	KLPDDFMGCV	AAGCTGCCCGACGACTTCATGGGCTGCGTG	CAGGAGGGCTCGGCAaagctgcccgacgacttcatgggctgcgtgGGATGCGGAGGGTCCGGCGGCCGCTCATCTCGTGCGACATCAAGCTATACTCTAA	411	420	Spike glycoprotein	http://www.ncbi.nlm.nih.gov/protein/P59594.1	Spike glycoprotein	http://www.uniprot.org/uniprot/P59594	SARS coronavirus BJ01	http://purl.obolibrary.org/obo/NCBITaxon_228407	SARS-related coronavirus	http://purl.obolibrary.org/obo/NCBITaxon_694009
32073	Linear peptide	KLPDLCTEL	AAGCTGCCCGACCTGTGCACCGAGCTG	CAGGAGGGCTCGGCAaagctgcccgacctgtgcaccgagctgGGATGCGGAGGGTCCGGCGGCCGCTCATCTCGTGCGACATCAAGCTATACTCTAATAT	13	21	Protein E6	http://www.ncbi.nlm.nih.gov/protein/P06463.1	Protein E6	http://www.uniprot.org/uniprot/P06463	Human papillomavirus type 18	http://purl.obolibrary.org/obo/NCBITaxon_333761	Alphapapillomavirus 7	http://purl.obolibrary.org/obo/NCBITaxon_337042
32085	Linear peptide	KLPQLCTEL	AAGCTGCCCCAGCTGTGCACCGAGCTG	CAGGAGGGCTCGGCAaagctgccccagctgtgcaccgagctgGGATGCGGAGGGTCCGGCGGCCGCTCATCTCGTGCGACATCAAGCTATACTCTAATAT	18	26	Protein E6	http://www.ncbi.nlm.nih.gov/protein/P03126.1	Protein E6	http://www.uniprot.org/uniprot/P03126	Human papillomavirus type 16	http://purl.obolibrary.org/obo/NCBITaxon_333760	Alphapapillomavirus 9	http://purl.obolibrary.org/obo/NCBITaxon_337041
32101	Linear peptide	KLQEQQSDL	AAGCTGCAGGAGCAGCAGAGCGACCTG	CAGGAGGGCTCGGCAaagctgcaggagcagcagagcgacctgGGATGCGGAGGGTCCGGCGGCCGCTCATCTCGTGCGACATCAAGCTATACTCTAATAT	191	199	Other Plasmodium falciparum (malaria parasite P. falciparum) protein	http://www.ncbi.nlm.nih.gov/protein/Q25893			Plasmodium falciparum	http://purl.obolibrary.org/obo/NCBITaxon_5833	Plasmodium falciparum	http://purl.obolibrary.org/obo/NCBITaxon_5833	Data originally imported from the HLA Ligand Database and recurated. The protein has multiple repeats of the sequence.
32103	Linear peptide	KLQERLAKL	AAGCTGCAGGAGAGGCTGGCCAAGCTG	CAGGAGGGCTCGGCAaagctgcaggagaggctggccaagctgGGATGCGGAGGGTCCGGCGGCCGCTCATCTCGTGCGACATCAAGCTATACTCTAATAT	362	370	60 kDa chaperonin 2 (UniProt:P9WPE7)	http://www.ncbi.nlm.nih.gov/protein/P0A520.2	60 kDa chaperonin 2	http://www.uniprot.org/uniprot/P9WPE7	Mycobacterium tuberculosis	http://purl.obolibrary.org/obo/NCBITaxon_1773	Mycobacterium tuberculosis	http://purl.obolibrary.org/obo/NCBITaxon_1773
32133	Linear peptide	KLRKPKHKKL	AAGCTGAGGAAGCCCAAGCACAAGAAGCTG	CAGGAGGGCTCGGCAaagctgaggaagcccaagcacaagaagctgGGATGCGGAGGGTCCGGCGGCCGCTCATCTCGTGCGACATCAAGCTATACTCTAA	104	113	Circumsporozoite (CS) protein	http://www.ncbi.nlm.nih.gov/protein/P02893.1	Circumsporozoite (CS) protein	http://www.uniprot.org/uniprot/Q7K740	Plasmodium falciparum 7G8	http://purl.obolibrary.org/obo/NCBITaxon_57266	Plasmodium falciparum	http://purl.obolibrary.org/obo/NCBITaxon_5833	Data originally imported from the HLA Ligand Database and recurated.
32157	Linear peptide	KLSDYEGRL	AAGCTGAGCGACTACGAGGGCAGGCTG	CAGGAGGGCTCGGCAaagctgagcgactacgagggcaggctgGGATGCGGAGGGTCCGGCGGCCGCTCATCTCGTGCGACATCAAGCTATACTCTAATAT	48	56	Nucleoprotein	http://www.ncbi.nlm.nih.gov/protein/AAT70629.1	Nucleoprotein	http://www.uniprot.org/uniprot/P03466	H5N1 subtype	http://purl.obolibrary.org/obo/NCBITaxon_102793	Influenza A virus	http://purl.obolibrary.org/obo/NCBITaxon_11320	The authors report that the epitope was synthesized based on strain H5N1-Thailand-human-2004.
32165	Linear peptide	KLSGLGINAV	AAGCTGAGCGGCCTGGGCATCAACGCCGTG	CAGGAGGGCTCGGCAaagctgagcggcctgggcatcaacgccgtgGGATGCGGAGGGTCCGGCGGCCGCTCATCTCGTGCGACATCAAGCTATACTCTAA	1406	1415	Genome polyprotein	http://www.ncbi.nlm.nih.gov/protein/P26663.3	Genome polyprotein	http://www.uniprot.org/uniprot/P27958	Hepatitis C virus (isolate BK)	http://purl.obolibrary.org/obo/NCBITaxon_11105	Hepatitis C virus	http://purl.obolibrary.org/obo/NCBITaxon_11103
32167	Linear peptide	KLSGLGLNAV	AAGCTGAGCGGCCTGGGCCTGAACGCCGTG	CAGGAGGGCTCGGCAaagctgagcggcctgggcctgaacgccgtgGGATGCGGAGGGTCCGGCGGCCGCTCATCTCGTGCGACATCAAGCTATACTCTAA	1406	1415	Genome polyprotein	http://www.ncbi.nlm.nih.gov/protein/BAB18806.1	Genome polyprotein	http://www.uniprot.org/uniprot/P27958	Hepatitis C virus	http://purl.obolibrary.org/obo/NCBITaxon_11103	Hepatitis C virus	http://purl.obolibrary.org/obo/NCBITaxon_11103
32179	Linear peptide	KLSSLGLNAV	AAGCTGAGCAGCCTGGGCCTGAACGCCGTG	CAGGAGGGCTCGGCAaagctgagcagcctgggcctgaacgccgtgGGATGCGGAGGGTCCGGCGGCCGCTCATCTCGTGCGACATCAAGCTATACTCTAA	1406	1415	Genome polyprotein	http://www.ncbi.nlm.nih.gov/protein/ABU97067.1	Genome polyprotein	http://www.uniprot.org/uniprot/P27958	Hepatitis C virus subtype 1b	http://purl.obolibrary.org/obo/NCBITaxon_31647	Hepatitis C virus	http://purl.obolibrary.org/obo/NCBITaxon_11103
32208	Linear peptide	KLVALGINAV	AAGCTGGTGGCCCTGGGCATCAACGCCGTG	CAGGAGGGCTCGGCAaagctggtggccctgggcatcaacgccgtgGGATGCGGAGGGTCCGGCGGCCGCTCATCTCGTGCGACATCAAGCTATACTCTAA	33	42	Genome polyprotein	http://www.ncbi.nlm.nih.gov/protein/AAU20346.1	Genome polyprotein	http://www.uniprot.org/uniprot/P27958	Hepatitis C virus	http://purl.obolibrary.org/obo/NCBITaxon_11103	Hepatitis C virus	http://purl.obolibrary.org/obo/NCBITaxon_11103
32209	Linear peptide	KLVALGVNAV	AAGCTGGTGGCCCTGGGCGTGAACGCCGTG	CAGGAGGGCTCGGCAaagctggtggccctgggcgtgaacgccgtgGGATGCGGAGGGTCCGGCGGCCGCTCATCTCGTGCGACATCAAGCTATACTCTAA	1406	1415	Genome polyprotein	http://www.ncbi.nlm.nih.gov/protein/ABV46144.2	Genome polyprotein	http://www.uniprot.org/uniprot/P27958	Hepatitis C virus subtype 1a	http://purl.obolibrary.org/obo/NCBITaxon_31646	Hepatitis C virus	http://purl.obolibrary.org/obo/NCBITaxon_11103
32210	Linear peptide	KLVAMGINAV	AAGCTGGTGGCCATGGGCATCAACGCCGTG	CAGGAGGGCTCGGCAaagctggtggccatgggcatcaacgccgtgGGATGCGGAGGGTCCGGCGGCCGCTCATCTCGTGCGACATCAAGCTATACTCTAA	1406	1415	Genome polyprotein	http://www.ncbi.nlm.nih.gov/protein/AAY82027.1	Genome polyprotein	http://www.uniprot.org/uniprot/P27958	Hepatitis C virus	http://purl.obolibrary.org/obo/NCBITaxon_11103	Hepatitis C virus	http://purl.obolibrary.org/obo/NCBITaxon_11103	The epitope is a natural variant of the sequence KLVALGINAV, which arose in one of the patients studied in the chronic phase of infection, replacing the original sequence as the dominant variant in the viruses isolated at >6 mo after infection.
32213	Linear peptide	KLVANNTRL	AAGCTGGTGGCCAACAACACCAGGCTG	CAGGAGGGCTCGGCAaagctggtggccaacaacaccaggctgGGATGCGGAGGGTCCGGCGGCCGCTCATCTCGTGCGACATCAAGCTATACTCTAATAT	239	247	Diacylglycerol acyltransferase/mycolyltransferase Ag85B	http://www.ncbi.nlm.nih.gov/protein/P31952	Diacylglycerol acyltransferase/mycolyltransferase Ag85B	http://www.uniprot.org/uniprot/P9WQP1	Mycobacterium tuberculosis	http://purl.obolibrary.org/obo/NCBITaxon_1773	Mycobacterium tuberculosis	http://purl.obolibrary.org/obo/NCBITaxon_1773
32237	Linear peptide	KLVSLGVNAV	AAGCTGGTGAGCCTGGGCGTGAACGCCGTG	CAGGAGGGCTCGGCAaagctggtgagcctgggcgtgaacgccgtgGGATGCGGAGGGTCCGGCGGCCGCTCATCTCGTGCGACATCAAGCTATACTCTAA	1406	1415	Genome polyprotein	http://www.ncbi.nlm.nih.gov/protein/ABV46286.2	Genome polyprotein	http://www.uniprot.org/uniprot/P27958	Hepatitis C virus subtype 1b	http://purl.obolibrary.org/obo/NCBITaxon_31647	Hepatitis C virus	http://purl.obolibrary.org/obo/NCBITaxon_11103
32238	Linear peptide	KLVVLGINAV	AAGCTGGTGGTGCTGGGCATCAACGCCGTG	CAGGAGGGCTCGGCAaagctggtggtgctgggcatcaacgccgtgGGATGCGGAGGGTCCGGCGGCCGCTCATCTCGTGCGACATCAAGCTATACTCTAA	1406	1415	Genome polyprotein	http://www.ncbi.nlm.nih.gov/protein/ABV46251.2	Genome polyprotein	http://www.uniprot.org/uniprot/P27958	Hepatitis C virus	http://purl.obolibrary.org/obo/NCBITaxon_11103	Hepatitis C virus	http://purl.obolibrary.org/obo/NCBITaxon_11103
32241	Linear peptide	KLWCRHFCV	AAGCTGTGGTGCAGGCACTTCTGCGTG	CAGGAGGGCTCGGCAaagctgtggtgcaggcacttctgcgtgGGATGCGGAGGGTCCGGCGGCCGCTCATCTCGTGCGACATCAAGCTATACTCTAATAT	576	584	Hemagglutinin glycoprotein	http://www.ncbi.nlm.nih.gov/protein/AAR89413.1	Hemagglutinin glycoprotein	http://www.uniprot.org/uniprot/Q786F2	Measles morbillivirus	http://purl.obolibrary.org/obo/NCBITaxon_11234	Measles morbillivirus	http://purl.obolibrary.org/obo/NCBITaxon_11234
32243	Linear peptide	KLWESPQEI	AAGCTGTGGGAGAGCCCCCAGGAGATC	CAGGAGGGCTCGGCAaagctgtgggagagcccccaggagatcGGATGCGGAGGGTCCGGCGGCCGCTCATCTCGTGCGACATCAAGCTATACTCTAATAT	84	92	Protein C	http://www.ncbi.nlm.nih.gov/protein/BAB60863.1	Protein C	http://www.uniprot.org/uniprot/Q9YZN9	Measles virus strain Edmonston	http://purl.obolibrary.org/obo/NCBITaxon_11235	Measles morbillivirus	http://purl.obolibrary.org/obo/NCBITaxon_11234
32250	Linear peptide	KLYCSYEVA	AAGCTGTACTGCAGCTACGAGGTGGCC	CAGGAGGGCTCGGCAaagctgtactgcagctacgaggtggccGGATGCGGAGGGTCCGGCGGCCGCTCATCTCGTGCGACATCAAGCTATACTCTAATAT	401	409	Trans-sialidase, putative (UniProt:K4DPA8)	http://www.ncbi.nlm.nih.gov/protein/JH0823	Trans-sialidase, putative	http://www.uniprot.org/uniprot/K4DPA8	Trypanosoma cruzi	http://purl.obolibrary.org/obo/NCBITaxon_5693	Trypanosoma cruzi	http://purl.obolibrary.org/obo/NCBITaxon_5693
32268	Linear peptide	KLYQNPTTYI	AAGCTGTACCAGAACCCCACCACCTACATC	CAGGAGGGCTCGGCAaagctgtaccagaaccccaccacctacatcGGATGCGGAGGGTCCGGCGGCCGCTCATCTCGTGCGACATCAAGCTATACTCTAA	205	214	Hemagglutinin	http://www.ncbi.nlm.nih.gov/protein/AAK38298.1	Hemagglutinin	http://www.uniprot.org/uniprot/P03452	Influenza A virus (A/Bar-headed Goose/Qinghai/61/05(H5N1))	http://purl.obolibrary.org/obo/NCBITaxon_336238	Influenza A virus	http://purl.obolibrary.org/obo/NCBITaxon_11320
32357	Linear peptide	KMLKEMGEV	AAGATGCTGAAGGAGATGGGCGAGGTG	CAGGAGGGCTCGGCAaagatgctgaaggagatgggcgaggtgGGATGCGGAGGGTCCGGCGGCCGCTCATCTCGTGCGACATCAAGCTATACTCTAATAT	137	145	Nucleoprotein	http://www.ncbi.nlm.nih.gov/protein/P03418.1	Nucleoprotein	http://www.uniprot.org/uniprot/O42053	Human respiratory syncytial virus A strain Long	http://purl.obolibrary.org/obo/NCBITaxon_11260	Human orthopneumovirus	http://purl.obolibrary.org/obo/NCBITaxon_11250
32404	Linear peptide	KMTLFKSIL	AAGATGACCCTGTTCAAGAGCATCCTG	CAGGAGGGCTCGGCAaagatgaccctgttcaagagcatcctgGGATGCGGAGGGTCCGGCGGCCGCTCATCTCGTGCGACATCAAGCTATACTCTAATAT	364	372	Core protease I7	http://www.ncbi.nlm.nih.gov/protein/P20501.1	Core protease I7	http://www.uniprot.org/uniprot/P12926	Vaccinia virus Copenhagen	http://purl.obolibrary.org/obo/NCBITaxon_10249	Vaccinia virus	http://purl.obolibrary.org/obo/NCBITaxon_10245
32410	Linear peptide	KMVELVHFL	AAGATGGTGGAGCTGGTGCACTTCCTG	CAGGAGGGCTCGGCAaagatggtggagctggtgcacttcctgGGATGCGGAGGGTCCGGCGGCCGCTCATCTCGTGCGACATCAAGCTATACTCTAATAT	112	120	Melanoma-associated antigen 2	http://www.ncbi.nlm.nih.gov/protein/AAH63681.1	Melanoma-associated antigen 2	http://www.uniprot.org/uniprot/P43356	Homo sapiens	http://purl.obolibrary.org/obo/NCBITaxon_9606	Homo sapiens	http://purl.obolibrary.org/obo/NCBITaxon_9606
32526	Linear peptide	KNKEKALII	AAGAACAAGGAGAAGGCCCTGATCATC	CAGGAGGGCTCGGCAaagaacaaggagaaggccctgatcatcGGATGCGGAGGGTCCGGCGGCCGCTCATCTCGTGCGACATCAAGCTATACTCTAATAT	109	117	Thrombospondin-related anonymous protein, TRAP	http://www.ncbi.nlm.nih.gov/protein/P16893.1	Thrombospondin-related anonymous protein, TRAP	http://www.uniprot.org/uniprot/Q76NM2	Plasmodium falciparum	http://purl.obolibrary.org/obo/NCBITaxon_5833	Plasmodium falciparum	http://purl.obolibrary.org/obo/NCBITaxon_5833
33912	Linear peptide	KTWADEYLCV	AAGACCTGGGCCGACGAGTACCTGTGCGTG	CAGGAGGGCTCGGCAaagacctgggccgacgagtacctgtgcgtgGGATGCGGAGGGTCCGGCGGCCGCTCATCTCGTGCGACATCAAGCTATACTCTAA	480	489	Trans-sialidase, putative (UniProt:K4DPA8)	http://www.ncbi.nlm.nih.gov/protein/JH0823	Trans-sialidase, putative	http://www.uniprot.org/uniprot/K4DPA8	Trypanosoma cruzi	http://purl.obolibrary.org/obo/NCBITaxon_5693	Trypanosoma cruzi	http://purl.obolibrary.org/obo/NCBITaxon_5693
33915	Linear peptide	KTWGQYWQV	AAGACCTGGGGCCAGTACTGGCAGGTG	CAGGAGGGCTCGGCAaagacctggggccagtactggcaggtgGGATGCGGAGGGTCCGGCGGCCGCTCATCTCGTGCGACATCAAGCTATACTCTAATAT	161	169	Melanocyte protein PMEL	http://www.ncbi.nlm.nih.gov/protein/AAA35930.1	Melanocyte protein PMEL	http://www.uniprot.org/uniprot/P40967	Homo sapiens	http://purl.obolibrary.org/obo/NCBITaxon_9606	Homo sapiens	http://purl.obolibrary.org/obo/NCBITaxon_9606
33942	Linear peptide	KVAEIVHFL	AAGGTGGCCGAGATCGTGCACTTCCTG	CAGGAGGGCTCGGCAaaggtggccgagatcgtgcacttcctgGGATGCGGAGGGTCCGGCGGCCGCTCATCTCGTGCGACATCAAGCTATACTCTAATAT											Imported from the TopBank database. This peptide is studied as an analog of the naturally occuring peptide KVAELVHFL
33943	Linear peptide	KVAELVHFL	AAGGTGGCCGAGCTGGTGCACTTCCTG	CAGGAGGGCTCGGCAaaggtggccgagctggtgcacttcctgGGATGCGGAGGGTCCGGCGGCCGCTCATCTCGTGCGACATCAAGCTATACTCTAATAT	111	119	Melanoma-associated antigen 9	http://www.ncbi.nlm.nih.gov/protein/P43362.1	Melanoma-associated antigen 9	http://www.uniprot.org/uniprot/P43362	Homo sapiens	http://purl.obolibrary.org/obo/NCBITaxon_9606	Homo sapiens	http://purl.obolibrary.org/obo/NCBITaxon_9606	Imported from the TopBank database.
33945	Linear peptide	KVAELVWFL	AAGGTGGCCGAGCTGGTGTGGTTCCTG	CAGGAGGGCTCGGCAaaggtggccgagctggtgtggttcctgGGATGCGGAGGGTCCGGCGGCCGCTCATCTCGTGCGACATCAAGCTATACTCTAATAT											Imported from the TopBank database. This peptide is studied as an analog of the naturally occuring peptide KVAELVHFL
33967	Linear peptide	KVDDTFYYV	AAGGTGGACGACACCTTCTACTACGTG	CAGGAGGGCTCGGCAaaggtggacgacaccttctactacgtgGGATGCGGAGGGTCCGGCGGCCGCTCATCTCGTGCGACATCAAGCTATACTCTAATAT	74	82	Interferon antagonist C7	http://www.ncbi.nlm.nih.gov/protein/P68599.1	Interferon antagonist C7	http://www.uniprot.org/uniprot/P68600	Vaccinia virus Copenhagen	http://purl.obolibrary.org/obo/NCBITaxon_10249	Vaccinia virus	http://purl.obolibrary.org/obo/NCBITaxon_10245
34095	Linear peptide	KVLEYVIKV	AAGGTGCTGGAGTACGTGATCAAGGTG	CAGGAGGGCTCGGCAaaggtgctggagtacgtgatcaaggtgGGATGCGGAGGGTCCGGCGGCCGCTCATCTCGTGCGACATCAAGCTATACTCTAATAT	278	286	Melanoma-associated antigen 1	http://www.ncbi.nlm.nih.gov/protein/P43355.1	Melanoma-associated antigen 1	http://www.uniprot.org/uniprot/P43355	Homo sapiens	http://purl.obolibrary.org/obo/NCBITaxon_9606	Homo sapiens	http://purl.obolibrary.org/obo/NCBITaxon_9606
34101	Linear peptide	KVLHKRTLGL	AAGGTGCTGCACAAGAGGACCCTGGGCCTG	CAGGAGGGCTCGGCAaaggtgctgcacaagaggaccctgggcctgGGATGCGGAGGGTCCGGCGGCCGCTCATCTCGTGCGACATCAAGCTATACTCTAA	91	100	Protein X	http://www.ncbi.nlm.nih.gov/protein/ACH95876.1	Protein X	http://www.uniprot.org/uniprot/Q69027	Hepatitis B virus	http://purl.obolibrary.org/obo/NCBITaxon_10407	Hepatitis B virus	http://purl.obolibrary.org/obo/NCBITaxon_10407	Epitope sequence present in HBV subtypes adr, adw, and ayw.
34251	Linear peptide	KVVSLVILA	AAGGTGGTGAGCCTGGTGATCCTGGCC	CAGGAGGGCTCGGCAaaggtggtgagcctggtgatcctggccGGATGCGGAGGGTCCGGCGGCCGCTCATCTCGTGCGACATCAAGCTATACTCTAATAT	236	244	Trans-sialidase, putative (UniProt:K4DPA8)	http://www.ncbi.nlm.nih.gov/protein/JH0823	Trans-sialidase, putative	http://www.uniprot.org/uniprot/K4DPA8	Trypanosoma cruzi	http://purl.obolibrary.org/obo/NCBITaxon_5693	Trypanosoma cruzi	http://purl.obolibrary.org/obo/NCBITaxon_5693
34554	Linear peptide	KYPENFFLL	AAGTACCCCGAGAACTTCTTCCTGCTG	CAGGAGGGCTCGGCAaagtaccccgagaacttcttcctgctgGGATGCGGAGGGTCCGGCGGCCGCTCATCTCGTGCGACATCAAGCTATACTCTAATAT	113	121	Serine/threonine-protein phosphatase PP1-alpha catalytic subunit	http://www.ncbi.nlm.nih.gov/protein/P62136.1	Serine/threonine-protein phosphatase PP1-alpha catalytic subunit	http://www.uniprot.org/uniprot/P62136	Homo sapiens	http://purl.obolibrary.org/obo/NCBITaxon_9606	Homo sapiens	http://purl.obolibrary.org/obo/NCBITaxon_9606
34851	Linear peptide	LALLLLDRL	CTGGCCCTGCTGCTGCTGGACAGGCTG	CAGGAGGGCTCGGCActggccctgctgctgctggacaggctgGGATGCGGAGGGTCCGGCGGCCGCTCATCTCGTGCGACATCAAGCTATACTCTAATAT	220	228	Nucleoprotein	http://www.ncbi.nlm.nih.gov/protein/P59595.1	Nucleoprotein	http://www.uniprot.org/uniprot/P59595	SARS coronavirus	http://purl.obolibrary.org/obo/NCBITaxon_227859	SARS-related coronavirus	http://purl.obolibrary.org/obo/NCBITaxon_694009
35785	Linear peptide	LFAAFPSFA	CTGTTCGCCGCCTTCCCCAGCTTCGCC	CAGGAGGGCTCGGCActgttcgccgccttccccagcttcgccGGATGCGGAGGGTCCGGCGGCCGCTCATCTCGTGCGACATCAAGCTATACTCTAATAT	21	29	Alpha-crystallin	http://www.ncbi.nlm.nih.gov/protein/P0A5B7.2	Alpha-crystallin	http://www.uniprot.org/uniprot/P9WMK1	Mycobacterium tuberculosis	http://purl.obolibrary.org/obo/NCBITaxon_1773	Mycobacterium tuberculosis	http://purl.obolibrary.org/obo/NCBITaxon_1773
35844	Linear peptide	LFGYPVYV	CTGTTCGGCTACCCCGTGTACGTG	CAGGAGGGCTCGGCActgttcggctaccccgtgtacgtgGGATGCGGAGGGTCCGGCGGCCGCTCATCTCGTGCGACATCAAGCTATACTCTAATATAGC	12	19	Protein Tax-1	http://www.ncbi.nlm.nih.gov/protein/AAG31572.1	Protein Tax-1	http://www.uniprot.org/uniprot/P14079	Human T-lymphotropic virus 1	http://purl.obolibrary.org/obo/NCBITaxon_11908	Primate T-lymphotropic virus 1	http://purl.obolibrary.org/obo/NCBITaxon_194440
36357	Linear peptide	LGYGFVNYI	CTGGGCTACGGCTTCGTGAACTACATC	CAGGAGGGCTCGGCActgggctacggcttcgtgaactacatcGGATGCGGAGGGTCCGGCGGCCGCTCATCTCGTGCGACATCAAGCTATACTCTAATAT	87	95	ELAV-like protein 4	http://www.ncbi.nlm.nih.gov/protein/P26378.1	ELAV-like protein 4	http://www.uniprot.org/uniprot/P26378	Homo sapiens	http://purl.obolibrary.org/obo/NCBITaxon_9606	Homo sapiens	http://purl.obolibrary.org/obo/NCBITaxon_9606
36358	Linear peptide	LGYGFVNYV	CTGGGCTACGGCTTCGTGAACTACGTG	CAGGAGGGCTCGGCActgggctacggcttcgtgaactacgtgGGATGCGGAGGGTCCGGCGGCCGCTCATCTCGTGCGACATCAAGCTATACTCTAATAT	61	69	ELAV-like protein 1 (UniProt:Q15717)	http://www.ncbi.nlm.nih.gov/protein/Q15717.2	ELAV-like protein 1	http://www.uniprot.org/uniprot/Q15717	Homo sapiens	http://purl.obolibrary.org/obo/NCBITaxon_9606	Homo sapiens	http://purl.obolibrary.org/obo/NCBITaxon_9606
36516	Linear peptide	LIFLARSAL	CTGATCTTCCTGGCCAGGAGCGCCCTG	CAGGAGGGCTCGGCActgatcttcctggccaggagcgccctgGGATGCGGAGGGTCCGGCGGCCGCTCATCTCGTGCGACATCAAGCTATACTCTAATAT	256	264	Nucleoprotein	http://www.ncbi.nlm.nih.gov/protein/AAT70629.1	Nucleoprotein	http://www.uniprot.org/uniprot/P03466	H5N1 subtype	http://purl.obolibrary.org/obo/NCBITaxon_102793	Influenza A virus	http://purl.obolibrary.org/obo/NCBITaxon_11320	The authors report that the epitope was synthesized based on strain H5N1-Thailand-human-2004.
36669	Linear peptide	LIQEIVHEV	CTGATCCAGGAGATCGTGCACGAGGTG	CAGGAGGGCTCGGCActgatccaggagatcgtgcacgaggtgGGATGCGGAGGGTCCGGCGGCCGCTCATCTCGTGCGACATCAAGCTATACTCTAATAT	571	579	Early transcription factor 82 kDa subunit	http://www.ncbi.nlm.nih.gov/protein/AAO89405.1	Early transcription factor 82 kDa subunit	http://www.uniprot.org/uniprot/P20636	Vaccinia virus WR	http://purl.obolibrary.org/obo/NCBITaxon_10254	Vaccinia virus	http://purl.obolibrary.org/obo/NCBITaxon_10245
36724	Linear peptide	LITGRLQSL	CTGATCACCGGCAGGCTGCAGAGCCTG	CAGGAGGGCTCGGCActgatcaccggcaggctgcagagcctgGGATGCGGAGGGTCCGGCGGCCGCTCATCTCGTGCGACATCAAGCTATACTCTAATAT	978	986	Spike glycoprotein	http://www.ncbi.nlm.nih.gov/protein/P59594.1	Spike glycoprotein	http://www.uniprot.org/uniprot/P59594	SARS coronavirus	http://purl.obolibrary.org/obo/NCBITaxon_227859	SARS-related coronavirus	http://purl.obolibrary.org/obo/NCBITaxon_694009
37097	Linear peptide	LLALLSCLTV	CTGCTGGCCCTGCTGAGCTGCCTGACCGTG	CAGGAGGGCTCGGCActgctggccctgctgagctgcctgaccgtgGGATGCGGAGGGTCCGGCGGCCGCTCATCTCGTGCGACATCAAGCTATACTCTAA	178	187	Genome polyprotein	http://www.ncbi.nlm.nih.gov/protein/P26664.3	Genome polyprotein	http://www.uniprot.org/uniprot/P27958	Hepatitis C virus (isolate 1)	http://purl.obolibrary.org/obo/NCBITaxon_11104	Hepatitis C virus	http://purl.obolibrary.org/obo/NCBITaxon_11103
37112	Linear peptide	LLAVLTAAPL	CTGCTGGCCGTGCTGACCGCCGCCCCCCTG	CAGGAGGGCTCGGCActgctggccgtgctgaccgccgcccccctgGGATGCGGAGGGTCCGGCGGCCGCTCATCTCGTGCGACATCAAGCTATACTCTAA	8	17	Phosphate-binding protein PstS 1	http://www.ncbi.nlm.nih.gov/protein/P15712.1	Phosphate-binding protein PstS 1	http://www.uniprot.org/uniprot/P9WGU1	Mycobacterium tuberculosis	http://purl.obolibrary.org/obo/NCBITaxon_1773	Mycobacterium tuberculosis	http://purl.obolibrary.org/obo/NCBITaxon_1773
37120	Linear peptide	LLCLIFLLV	CTGCTGTGCCTGATCTTCCTGCTGGTG	CAGGAGGGCTCGGCActgctgtgcctgatcttcctgctggtgGGATGCGGAGGGTCCGGCGGCCGCTCATCTCGTGCGACATCAAGCTATACTCTAATAT	251	259	Large envelope protein	http://www.ncbi.nlm.nih.gov/protein/BAA85374.1	Large envelope protein	http://www.uniprot.org/uniprot/Q76R62	Hepatitis B virus subtype ayw	http://purl.obolibrary.org/obo/NCBITaxon_10418	Hepatitis B virus	http://purl.obolibrary.org/obo/NCBITaxon_10407
37127	Linear peptide	LLCPAGHAV	CTGCTGTGCCCCGCCGGCCACGCCGTG	CAGGAGGGCTCGGCActgctgtgccccgccggccacgccgtgGGATGCGGAGGGTCCGGCGGCCGCTCATCTCGTGCGACATCAAGCTATACTCTAATAT	1169	1177	Genome polyprotein	http://www.ncbi.nlm.nih.gov/protein/ABR25251.1	Genome polyprotein	http://www.uniprot.org/uniprot/P27958	Hepatitis C virus	http://purl.obolibrary.org/obo/NCBITaxon_11103	Hepatitis C virus	http://purl.obolibrary.org/obo/NCBITaxon_11103
37140	Linear peptide	LLDAHIPQL	CTGCTGGACGCCCACATCCCCCAGCTG	CAGGAGGGCTCGGCActgctggacgcccacatcccccagctgGGATGCGGAGGGTCCGGCGGCCGCTCATCTCGTGCGACATCAAGCTATACTCTAATAT	3	11	ESAT-6-like protein EsxG	http://www.ncbi.nlm.nih.gov/protein/O53692.1	ESAT-6-like protein EsxG	http://www.uniprot.org/uniprot/O53692	Mycobacterium tuberculosis	http://purl.obolibrary.org/obo/NCBITaxon_1773	Mycobacterium tuberculosis	http://purl.obolibrary.org/obo/NCBITaxon_1773
37146	Linear peptide	LLDEGKQSL	CTGCTGGACGAGGGCAAGCAGAGCCTG	CAGGAGGGCTCGGCActgctggacgagggcaagcagagcctgGGATGCGGAGGGTCCGGCGGCCGCTCATCTCGTGCGACATCAAGCTATACTCTAATAT	28	36	6 kDa early secretory antigenic target	http://www.ncbi.nlm.nih.gov/protein/P0A564.2	6 kDa early secretory antigenic target	http://www.uniprot.org/uniprot/P9WNK7	Mycobacterium tuberculosis	http://purl.obolibrary.org/obo/NCBITaxon_1773	Mycobacterium tuberculosis	http://purl.obolibrary.org/obo/NCBITaxon_1773
37149	Linear peptide	LLDEPTNHL	CTGCTGGACGAGCCCACCAACCACCTG	CAGGAGGGCTCGGCActgctggacgagcccaccaaccacctgGGATGCGGAGGGTCCGGCGGCCGCTCATCTCGTGCGACATCAAGCTATACTCTAATAT	251	259	ATP-binding cassette sub-family F member 2	http://www.ncbi.nlm.nih.gov/protein/EAW54015.1	ATP-binding cassette sub-family F member 2	http://www.uniprot.org/uniprot/Q9UG63	Homo sapiens	http://purl.obolibrary.org/obo/NCBITaxon_9606	Homo sapiens	http://purl.obolibrary.org/obo/NCBITaxon_9606
37153	Linear peptide	LLDFVRFMGV	CTGCTGGACTTCGTGAGGTTCATGGGCGTG	CAGGAGGGCTCGGCActgctggacttcgtgaggttcatgggcgtgGGATGCGGAGGGTCCGGCGGCCGCTCATCTCGTGCGACATCAAGCTATACTCTAA	284	293	Epstein-Barr nuclear antigen 6	http://www.ncbi.nlm.nih.gov/protein/Q69140.1	Epstein-Barr nuclear antigen 6	http://www.uniprot.org/uniprot/P03204	Human gammaherpesvirus 4	http://purl.obolibrary.org/obo/NCBITaxon_10376	Human gammaherpesvirus 4	http://purl.obolibrary.org/obo/NCBITaxon_10376
37182	Linear peptide	LLDVPTAAV	CTGCTGGACGTGCCCACCGCCGCCGTG	CAGGAGGGCTCGGCActgctggacgtgcccaccgccgccgtgGGATGCGGAGGGTCCGGCGGCCGCTCATCTCGTGCGACATCAAGCTATACTCTAATAT	24	32	Gamma-interferon-inducible lysosomal thiol reductase	http://www.ncbi.nlm.nih.gov/protein/AAD22672.1	Gamma-interferon-inducible lysosomal thiol reductase	http://www.uniprot.org/uniprot/P13284	Homo sapiens	http://purl.obolibrary.org/obo/NCBITaxon_9606	Homo sapiens	http://purl.obolibrary.org/obo/NCBITaxon_9606
37183	Linear peptide	LLDVTAAV	CTGCTGGACGTGACCGCCGCCGTG	CAGGAGGGCTCGGCActgctggacgtgaccgccgccgtgGGATGCGGAGGGTCCGGCGGCCGCTCATCTCGTGCGACATCAAGCTATACTCTAATATAGC			Other Homo sapiens (human) protein	https://ontology.iedb.org/ontology/ONTIE_0002212			Homo sapiens	http://purl.obolibrary.org/obo/NCBITaxon_9606	Homo sapiens	http://purl.obolibrary.org/obo/NCBITaxon_9606
37187	Linear peptide	LLDYQGMLPV	CTGCTGGACTACCAGGGCATGCTGCCCGTG	CAGGAGGGCTCGGCActgctggactaccagggcatgctgcccgtgGGATGCGGAGGGTCCGGCGGCCGCTCATCTCGTGCGACATCAAGCTATACTCTAA	260	269	Large envelope protein	http://www.ncbi.nlm.nih.gov/protein/BAA85374.1	Large envelope protein	http://www.uniprot.org/uniprot/Q76R62	Hepatitis B virus subtype ayw	http://purl.obolibrary.org/obo/NCBITaxon_10418	Hepatitis B virus	http://purl.obolibrary.org/obo/NCBITaxon_10407
37246	Linear peptide	LLFEEYTNI	CTGCTGTTCGAGGAGTACACCAACATC	CAGGAGGGCTCGGCActgctgttcgaggagtacaccaacatcGGATGCGGAGGGTCCGGCGGCCGCTCATCTCGTGCGACATCAAGCTATACTCTAATAT	307	315	Protein Tax-1	http://www.ncbi.nlm.nih.gov/protein/AAG31572.1	Protein Tax-1	http://www.uniprot.org/uniprot/P14079	Human T-lymphotropic virus 1	http://purl.obolibrary.org/obo/NCBITaxon_11908	Primate T-lymphotropic virus 1	http://purl.obolibrary.org/obo/NCBITaxon_194440
37251	Linear peptide	LLFGHPVYV	CTGCTGTTCGGCCACCCCGTGTACGTG	CAGGAGGGCTCGGCActgctgttcggccaccccgtgtacgtgGGATGCGGAGGGTCCGGCGGCCGCTCATCTCGTGCGACATCAAGCTATACTCTAATAT	11	19	transcriptional activator Tax	http://www.ncbi.nlm.nih.gov/protein/AAG31572.1	Protein Tax-1	http://www.uniprot.org/uniprot/P14079	Human T-lymphotropic virus 1	http://purl.obolibrary.org/obo/NCBITaxon_11908	Primate T-lymphotropic virus 1	http://purl.obolibrary.org/obo/NCBITaxon_194440		analog
37253	Linear peptide	LLFGYAVYV	CTGCTGTTCGGCTACGCCGTGTACGTG	CAGGAGGGCTCGGCActgctgttcggctacgccgtgtacgtgGGATGCGGAGGGTCCGGCGGCCGCTCATCTCGTGCGACATCAAGCTATACTCTAATAT	11	19	transcriptional activator Tax	http://www.ncbi.nlm.nih.gov/protein/AAG31572.1	Protein Tax-1	http://www.uniprot.org/uniprot/P14079	Human T-lymphotropic virus 1	http://purl.obolibrary.org/obo/NCBITaxon_11908	Primate T-lymphotropic virus 1	http://purl.obolibrary.org/obo/NCBITaxon_194440		analog
37254	Linear peptide	LLFGYPRYV	CTGCTGTTCGGCTACCCCAGGTACGTG	CAGGAGGGCTCGGCActgctgttcggctaccccaggtacgtgGGATGCGGAGGGTCCGGCGGCCGCTCATCTCGTGCGACATCAAGCTATACTCTAATAT	11	19	transcriptional activator Tax	http://www.ncbi.nlm.nih.gov/protein/AAG31572.1	Protein Tax-1	http://www.uniprot.org/uniprot/P14079	Human T-lymphotropic virus 1	http://purl.obolibrary.org/obo/NCBITaxon_11908	Primate T-lymphotropic virus 1	http://purl.obolibrary.org/obo/NCBITaxon_194440		analog
37255	Linear peptide	LLFGYPVAV	CTGCTGTTCGGCTACCCCGTGGCCGTG	CAGGAGGGCTCGGCActgctgttcggctaccccgtggccgtgGGATGCGGAGGGTCCGGCGGCCGCTCATCTCGTGCGACATCAAGCTATACTCTAATAT	11	19	transcriptional activator Tax	http://www.ncbi.nlm.nih.gov/protein/AAG31572.1	Protein Tax-1	http://www.uniprot.org/uniprot/P14079	Human T-lymphotropic virus 1	http://purl.obolibrary.org/obo/NCBITaxon_11908	Primate T-lymphotropic virus 1	http://purl.obolibrary.org/obo/NCBITaxon_194440		analog
37257	Linear peptide	LLFGYPVYV	CTGCTGTTCGGCTACCCCGTGTACGTG	CAGGAGGGCTCGGCActgctgttcggctaccccgtgtacgtgGGATGCGGAGGGTCCGGCGGCCGCTCATCTCGTGCGACATCAAGCTATACTCTAATAT	11	19	Protein Tax-1	http://www.ncbi.nlm.nih.gov/protein/AAG31572.1	Protein Tax-1	http://www.uniprot.org/uniprot/P14079	Human T-lymphotropic virus 1	http://purl.obolibrary.org/obo/NCBITaxon_11908	Primate T-lymphotropic virus 1	http://purl.obolibrary.org/obo/NCBITaxon_194440
37286	Linear peptide	LLFNILGGWV	CTGCTGTTCAACATCCTGGGCGGCTGGGTG	CAGGAGGGCTCGGCActgctgttcaacatcctgggcggctgggtgGGATGCGGAGGGTCCGGCGGCCGCTCATCTCGTGCGACATCAAGCTATACTCTAA	1807	1816	Genome polyprotein	http://www.ncbi.nlm.nih.gov/protein/BAA01582.1	Genome polyprotein	http://www.uniprot.org/uniprot/P27958	Hepatitis C virus	http://purl.obolibrary.org/obo/NCBITaxon_11103	Hepatitis C virus	http://purl.obolibrary.org/obo/NCBITaxon_11103
37317	Linear peptide	LLGCIITSL	CTGCTGGGCTGCATCATCACCAGCCTG	CAGGAGGGCTCGGCActgctgggctgcatcatcaccagcctgGGATGCGGAGGGTCCGGCGGCCGCTCATCTCGTGCGACATCAAGCTATACTCTAATAT	1039	1047	Genome polyprotein	http://www.ncbi.nlm.nih.gov/protein/P26662.3	Genome polyprotein	http://www.uniprot.org/uniprot/P27958	Hepatitis C virus (isolate Japanese)	http://purl.obolibrary.org/obo/NCBITaxon_11116	Hepatitis C virus	http://purl.obolibrary.org/obo/NCBITaxon_11103
37347	Linear peptide	LLGLWGLATA	CTGCTGGGCCTGTGGGGCCTGGCCACCGCC	CAGGAGGGCTCGGCActgctgggcctgtggggcctggccaccgccGGATGCGGAGGGTCCGGCGGCCGCTCATCTCGTGCGACATCAAGCTATACTCTAA	743	752	Trans-sialidase, putative (UniProt:K4DSI5)	http://www.ncbi.nlm.nih.gov/protein/P18269.2	Trans-sialidase, putative	http://www.uniprot.org/uniprot/K4DSI5	Trypanosoma cruzi	http://purl.obolibrary.org/obo/NCBITaxon_5693	Trypanosoma cruzi	http://purl.obolibrary.org/obo/NCBITaxon_5693
37348	Linear peptide	LLGLWGLTGL	CTGCTGGGCCTGTGGGGCCTGACCGGCCTG	CAGGAGGGCTCGGCActgctgggcctgtggggcctgaccggcctgGGATGCGGAGGGTCCGGCGGCCGCTCATCTCGTGCGACATCAAGCTATACTCTAA	668	677	Trans-sialidase, putative (UniProt:K4DVP7)	http://www.ncbi.nlm.nih.gov/protein/AAB18265.1	Trans-sialidase, putative	http://www.uniprot.org/uniprot/K4DVP7	Trypanosoma cruzi	http://purl.obolibrary.org/obo/NCBITaxon_5693	Trypanosoma cruzi	http://purl.obolibrary.org/obo/NCBITaxon_5693	Imported from the TopBank database.
37350	Linear peptide	LLGLWGTAAL	CTGCTGGGCCTGTGGGGCACCGCCGCCCTG	CAGGAGGGCTCGGCActgctgggcctgtggggcaccgccgccctgGGATGCGGAGGGTCCGGCGGCCGCTCATCTCGTGCGACATCAAGCTATACTCTAA	188	197	Trans-sialidase, putative (UniProt:K4DRP4)	http://www.ncbi.nlm.nih.gov/protein/EAN80945.1	Trans-sialidase, putative	http://www.uniprot.org/uniprot/K4DRP4	Trypanosoma cruzi	http://purl.obolibrary.org/obo/NCBITaxon_5693	Trypanosoma cruzi	http://purl.obolibrary.org/obo/NCBITaxon_5693
37351	Linear peptide	LLGLWVFAAL	CTGCTGGGCCTGTGGGTGTTCGCCGCCCTG	CAGGAGGGCTCGGCActgctgggcctgtgggtgttcgccgccctgGGATGCGGAGGGTCCGGCGGCCGCTCATCTCGTGCGACATCAAGCTATACTCTAA	573	582	Trans-sialidase, putative (UniProt:K4DMA7)	http://www.ncbi.nlm.nih.gov/protein/EAN81560.1	Trans-sialidase, putative	http://www.uniprot.org/uniprot/K4DMA7	Trypanosoma cruzi	http://purl.obolibrary.org/obo/NCBITaxon_5693	Trypanosoma cruzi	http://purl.obolibrary.org/obo/NCBITaxon_5693
37364	Linear peptide	LLGRNSFEV	CTGCTGGGCAGGAACAGCTTCGAGGTG	CAGGAGGGCTCGGCActgctgggcaggaacagcttcgaggtgGGATGCGGAGGGTCCGGCGGCCGCTCATCTCGTGCGACATCAAGCTATACTCTAATAT	264	272	Cellular tumor antigen p53	http://www.ncbi.nlm.nih.gov/protein/P04637.2	Cellular tumor antigen p53	http://www.uniprot.org/uniprot/P04637	Homo sapiens	http://purl.obolibrary.org/obo/NCBITaxon_9606	Homo sapiens	http://purl.obolibrary.org/obo/NCBITaxon_9606
37397	Linear peptide	LLHTDFEQV	CTGCTGCACACCGACTTCGAGCAGGTG	CAGGAGGGCTCGGCActgctgcacaccgacttcgagcaggtgGGATGCGGAGGGTCCGGCGGCCGCTCATCTCGTGCGACATCAAGCTATACTCTAATAT	276	284	Non-structural protein 1	http://www.ncbi.nlm.nih.gov/protein/P07298.1	Non-structural protein 1	http://www.uniprot.org/uniprot/Q9PZT1	Human parvovirus B19	http://purl.obolibrary.org/obo/NCBITaxon_10798	Primate erythroparvovirus 1	http://purl.obolibrary.org/obo/NCBITaxon_1511900
37398	Linear peptide	LLHTDFEQVM	CTGCTGCACACCGACTTCGAGCAGGTGATG	CAGGAGGGCTCGGCActgctgcacaccgacttcgagcaggtgatgGGATGCGGAGGGTCCGGCGGCCGCTCATCTCGTGCGACATCAAGCTATACTCTAA	276	285	Non-structural protein 1	http://www.ncbi.nlm.nih.gov/protein/P07298.1	Non-structural protein 1	http://www.uniprot.org/uniprot/Q9PZT1	Human parvovirus B19	http://purl.obolibrary.org/obo/NCBITaxon_10798	Primate erythroparvovirus 1	http://purl.obolibrary.org/obo/NCBITaxon_1511900
37473	Linear peptide	LLLDRLNQL	CTGCTGCTGGACAGGCTGAACCAGCTG	CAGGAGGGCTCGGCActgctgctggacaggctgaaccagctgGGATGCGGAGGGTCCGGCGGCCGCTCATCTCGTGCGACATCAAGCTATACTCTAATAT	223	231	Nucleoprotein	http://www.ncbi.nlm.nih.gov/protein/P59595.1	Nucleoprotein	http://www.uniprot.org/uniprot/P59595	SARS coronavirus	http://purl.obolibrary.org/obo/NCBITaxon_227859	SARS-related coronavirus	http://purl.obolibrary.org/obo/NCBITaxon_694009
37474	Linear peptide	LLLDVPTAAV	CTGCTGCTGGACGTGCCCACCGCCGCCGTG	CAGGAGGGCTCGGCActgctgctggacgtgcccaccgccgccgtgGGATGCGGAGGGTCCGGCGGCCGCTCATCTCGTGCGACATCAAGCTATACTCTAA	15	24	Gamma-interferon-inducible lysosomal thiol reductase	http://www.ncbi.nlm.nih.gov/protein/P13284.3	Gamma-interferon-inducible lysosomal thiol reductase	http://www.uniprot.org/uniprot/P13284	Homo sapiens	http://purl.obolibrary.org/obo/NCBITaxon_9606	Homo sapiens	http://purl.obolibrary.org/obo/NCBITaxon_9606
37475	Linear peptide	LLLDVPTAAVQA	CTGCTGCTGGACGTGCCCACCGCCGCCGTGCAGGCC	CAGGAGGGCTCGGCActgctgctggacgtgcccaccgccgccgtgcaggccGGATGCGGAGGGTCCGGCGGCCGCTCATCTCGTGCGACATCAAGCTATA	15	26	Gamma-interferon-inducible lysosomal thiol reductase	http://www.ncbi.nlm.nih.gov/protein/P13284.3	Gamma-interferon-inducible lysosomal thiol reductase	http://www.uniprot.org/uniprot/P13284	Homo sapiens	http://purl.obolibrary.org/obo/NCBITaxon_9606	Homo sapiens	http://purl.obolibrary.org/obo/NCBITaxon_9606
37476	Linear peptide	LLLDVTPLSL	CTGCTGCTGGACGTGACCCCCCTGAGCCTG	CAGGAGGGCTCGGCActgctgctggacgtgacccccctgagcctgGGATGCGGAGGGTCCGGCGGCCGCTCATCTCGTGCGACATCAAGCTATACTCTAA	436	445	Stress-70 protein, mitochondrial	http://www.ncbi.nlm.nih.gov/protein/P38646.2	Stress-70 protein, mitochondrial	http://www.uniprot.org/uniprot/P38646	Homo sapiens	http://purl.obolibrary.org/obo/NCBITaxon_9606	Homo sapiens	http://purl.obolibrary.org/obo/NCBITaxon_9606
37498	Linear peptide	LLLGLWGTAA	CTGCTGCTGGGCCTGTGGGGCACCGCCGCC	CAGGAGGGCTCGGCActgctgctgggcctgtggggcaccgccgccGGATGCGGAGGGTCCGGCGGCCGCTCATCTCGTGCGACATCAAGCTATACTCTAA	992	1001	Trans-sialidase, putative (UniProt:K4DPA8)	http://www.ncbi.nlm.nih.gov/protein/JH0823	Trans-sialidase, putative	http://www.uniprot.org/uniprot/K4DPA8	Trypanosoma cruzi	http://purl.obolibrary.org/obo/NCBITaxon_5693	Trypanosoma cruzi	http://purl.obolibrary.org/obo/NCBITaxon_5693
37507	Linear peptide	LLLIWFRPV	CTGCTGCTGATCTGGTTCAGGCCCGTG	CAGGAGGGCTCGGCActgctgctgatctggttcaggcccgtgGGATGCGGAGGGTCCGGCGGCCGCTCATCTCGTGCGACATCAAGCTATACTCTAATAT	579	587	Human polyomavirus 1 protein	http://www.ncbi.nlm.nih.gov/protein/P03071.1			Human polyomavirus 1	http://purl.obolibrary.org/obo/NCBITaxon_1891762	Human polyomavirus 1	http://purl.obolibrary.org/obo/NCBITaxon_1891762
37517	Linear peptide	LLLLGLWGL	CTGCTGCTGCTGGGCCTGTGGGGCCTG	CAGGAGGGCTCGGCActgctgctgctgggcctgtggggcctgGGATGCGGAGGGTCCGGCGGCCGCTCATCTCGTGCGACATCAAGCTATACTCTAATAT	666	674	Trans-sialidase, putative (UniProt:K4DVP7)	http://www.ncbi.nlm.nih.gov/protein/AAB18265.1	Trans-sialidase, putative	http://www.uniprot.org/uniprot/K4DVP7	Trypanosoma cruzi	http://purl.obolibrary.org/obo/NCBITaxon_5693	Trypanosoma cruzi	http://purl.obolibrary.org/obo/NCBITaxon_5693	Imported from the TopBank database.
37569	Linear peptide	LLMDCSGSI	CTGCTGATGGACTGCAGCGGCAGCATC	CAGGAGGGCTCGGCActgctgatggactgcagcggcagcatcGGATGCGGAGGGTCCGGCGGCCGCTCATCTCGTGCGACATCAAGCTATACTCTAATAT	51	59	Thrombospondin-related anonymous protein, TRAP	http://www.ncbi.nlm.nih.gov/protein/P16893.1	Thrombospondin-related anonymous protein, TRAP	http://www.uniprot.org/uniprot/Q76NM2	Plasmodium falciparum	http://purl.obolibrary.org/obo/NCBITaxon_5833	Plasmodium falciparum	http://purl.obolibrary.org/obo/NCBITaxon_5833
37573	Linear peptide	LLMGTLGIV	CTGCTGATGGGCACCCTGGGCATCGTG	CAGGAGGGCTCGGCActgctgatgggcaccctgggcatcgtgGGATGCGGAGGGTCCGGCGGCCGCTCATCTCGTGCGACATCAAGCTATACTCTAATAT	82	90	Protein E7	http://www.ncbi.nlm.nih.gov/protein/P03129.1	Protein E7	http://www.uniprot.org/uniprot/P03129	Human papillomavirus type 16	http://purl.obolibrary.org/obo/NCBITaxon_333760	Alphapapillomavirus 9	http://purl.obolibrary.org/obo/NCBITaxon_337041	Data originally imported from the HLA Ligand Database and re-curated by IEDB.
37590	Linear peptide	LLMWEAVTV	CTGCTGATGTGGGAGGCCGTGACCGTG	CAGGAGGGCTCGGCActgctgatgtgggaggccgtgaccgtgGGATGCGGAGGGTCCGGCGGCCGCTCATCTCGTGCGACATCAAGCTATACTCTAATAT	108	116	Human polyomavirus 1 protein	http://www.ncbi.nlm.nih.gov/protein/BAF93325.1			Human polyomavirus 1	http://purl.obolibrary.org/obo/NCBITaxon_1891762	Human polyomavirus 1	http://purl.obolibrary.org/obo/NCBITaxon_1891762
37598	Linear peptide	LLNATDIAV	CTGCTGAACGCCACCGACATCGCCGTG	CAGGAGGGCTCGGCActgctgaacgccaccgacatcgccgtgGGATGCGGAGGGTCCGGCGGCCGCTCATCTCGTGCGACATCAAGCTATACTCTAATAT			Envelope glycoprotein gp160	https://ontology.iedb.org/ontology/ONTIE_0002602	Envelope glycoprotein gp160	http://www.uniprot.org/uniprot/P04578	Human immunodeficiency virus 1	http://purl.obolibrary.org/obo/NCBITaxon_11676	Human immunodeficiency virus 1	http://purl.obolibrary.org/obo/NCBITaxon_11676
37607	Linear peptide	LLNGWRWRL	CTGCTGAACGGCTGGAGGTGGAGGCTG	CAGGAGGGCTCGGCActgctgaacggctggaggtggaggctgGGATGCGGAGGGTCCGGCGGCCGCTCATCTCGTGCGACATCAAGCTATACTCTAATAT	17	25	Protein K12	http://www.ncbi.nlm.nih.gov/protein/AAD46499.1	Protein K12	http://www.uniprot.org/uniprot/Q77Q38	Human gammaherpesvirus 8	http://purl.obolibrary.org/obo/NCBITaxon_37296	Human gammaherpesvirus 8	http://purl.obolibrary.org/obo/NCBITaxon_37296
37678	Linear peptide	LLPPELSET	CTGCTGCCCCCCGAGCTGAGCGAGACC	CAGGAGGGCTCGGCActgctgccccccgagctgagcgagaccGGATGCGGAGGGTCCGGCGGCCGCTCATCTCGTGCGACATCAAGCTATACTCTAATAT	277	285	Envelope glycoprotein D	http://www.ncbi.nlm.nih.gov/protein/Q69091.1	Envelope glycoprotein D	http://www.uniprot.org/uniprot/Q69091	Herpes simplex virus (type 1 / strain 17)	http://purl.obolibrary.org/obo/NCBITaxon_10299	Human alphaherpesvirus 1	http://purl.obolibrary.org/obo/NCBITaxon_10298
37685	Linear peptide	LLPRRGPRL	CTGCTGCCCAGGAGGGGCCCCAGGCTG	CAGGAGGGCTCGGCActgctgcccaggaggggccccaggctgGGATGCGGAGGGTCCGGCGGCCGCTCATCTCGTGCGACATCAAGCTATACTCTAATAT	36	44	Genome polyprotein	http://www.ncbi.nlm.nih.gov/protein/P29846.3	Genome polyprotein	http://www.uniprot.org/uniprot/P27958	Hepatitis C virus (isolate Taiwan)	http://purl.obolibrary.org/obo/NCBITaxon_31645	Hepatitis C virus	http://purl.obolibrary.org/obo/NCBITaxon_11103
37700	Linear peptide	LLQDSVDFSL	CTGCTGCAGGACAGCGTGGACTTCAGCCTG	CAGGAGGGCTCGGCActgctgcaggacagcgtggacttcagcctgGGATGCGGAGGGTCCGGCGGCCGCTCATCTCGTGCGACATCAAGCTATACTCTAA	79	88	Vimentin	http://www.ncbi.nlm.nih.gov/protein/NP_003371.1	Vimentin	http://www.uniprot.org/uniprot/P08670	Homo sapiens	http://purl.obolibrary.org/obo/NCBITaxon_9606	Homo sapiens	http://purl.obolibrary.org/obo/NCBITaxon_9606
37765	Linear peptide	LLSAEPVPA	CTGCTGAGCGCCGAGCCCGTGCCCGCC	CAGGAGGGCTCGGCActgctgagcgccgagcccgtgcccgccGGATGCGGAGGGTCCGGCGGCCGCTCATCTCGTGCGACATCAAGCTATACTCTAATAT	20	28	B-cell antigen receptor complex-associated protein beta chain	http://www.ncbi.nlm.nih.gov/protein/P40259.1	B-cell antigen receptor complex-associated protein beta chain	http://www.uniprot.org/uniprot/P40259	Homo sapiens	http://purl.obolibrary.org/obo/NCBITaxon_9606	Homo sapiens	http://purl.obolibrary.org/obo/NCBITaxon_9606
37835	Linear peptide	LLSVLAAVGL	CTGCTGAGCGTGCTGGCCGCCGTGGGCCTG	CAGGAGGGCTCGGCActgctgagcgtgctggccgccgtgggcctgGGATGCGGAGGGTCCGGCGGCCGCTCATCTCGTGCGACATCAAGCTATACTCTAA	14	23	Probable serine protease PepA (Serine proteinase) (MTB32A)	http://www.ncbi.nlm.nih.gov/protein/NP_214639.1	Probable serine protease PepA (Serine proteinase) (MTB32A)	http://www.uniprot.org/uniprot/O07175	Mycobacterium tuberculosis	http://purl.obolibrary.org/obo/NCBITaxon_1773	Mycobacterium tuberculosis	http://purl.obolibrary.org/obo/NCBITaxon_1773
37851	Linear peptide	LLTEVETYV	CTGCTGACCGAGGTGGAGACCTACGTG	CAGGAGGGCTCGGCActgctgaccgaggtggagacctacgtgGGATGCGGAGGGTCCGGCGGCCGCTCATCTCGTGCGACATCAAGCTATACTCTAATAT	3	11	Matrix protein 1	http://www.ncbi.nlm.nih.gov/protein/ABO21712.1	Matrix protein 1	http://www.uniprot.org/uniprot/P03485	Influenza A virus (A/Puerto Rico/8/1934(H1N1))	http://purl.obolibrary.org/obo/NCBITaxon_211044	Influenza A virus	http://purl.obolibrary.org/obo/NCBITaxon_11320
37877	Linear peptide	LLTTSGVSA	CTGCTGACCACCAGCGGCGTGAGCGCC	CAGGAGGGCTCGGCActgctgaccaccagcggcgtgagcgccGGATGCGGAGGGTCCGGCGGCCGCTCATCTCGTGCGACATCAAGCTATACTCTAATAT	386	394	Cysteine peptidase, putative,cysteine peptidase, clan CA, family C1, cathepsin L-like, putative (UniProt:K4DPT9)	http://www.ncbi.nlm.nih.gov/protein/A45629	Cysteine peptidase, putative,cysteine peptidase, clan CA, family C1, cathepsin L-like, putative	http://www.uniprot.org/uniprot/K4DPT9	Trypanosoma cruzi	http://purl.obolibrary.org/obo/NCBITaxon_5693	Trypanosoma cruzi	http://purl.obolibrary.org/obo/NCBITaxon_5693
37887	Linear peptide	LLVDLLWLL	CTGCTGGTGGACCTGCTGTGGCTGCTG	CAGGAGGGCTCGGCActgctggtggacctgctgtggctgctgGGATGCGGAGGGTCCGGCGGCCGCTCATCTCGTGCGACATCAAGCTATACTCTAATAT	167	175	Latent membrane protein 1	http://www.ncbi.nlm.nih.gov/protein/P03230.1	Latent membrane protein 1	http://www.uniprot.org/uniprot/P03230	Human gammaherpesvirus 4	http://purl.obolibrary.org/obo/NCBITaxon_10376	Human gammaherpesvirus 4	http://purl.obolibrary.org/obo/NCBITaxon_10376
37938	Linear peptide	LLWAARPRL	CTGCTGTGGGCCGCCAGGCCCAGGCTG	CAGGAGGGCTCGGCActgctgtgggccgccaggcccaggctgGGATGCGGAGGGTCCGGCGGCCGCTCATCTCGTGCGACATCAAGCTATACTCTAATAT	356	364	Putative BARF0 protein	http://www.ncbi.nlm.nih.gov/protein/Q8AZJ4	Putative BARF0 protein	http://www.uniprot.org/uniprot/Q8AZJ4	Human herpesvirus 4 strain B95-8	http://purl.obolibrary.org/obo/NCBITaxon_10377	Human gammaherpesvirus 4	http://purl.obolibrary.org/obo/NCBITaxon_10376
37955	Linear peptide	LLWSYAMGV	CTGCTGTGGAGCTACGCCATGGGCGTG	CAGGAGGGCTCGGCActgctgtggagctacgccatgggcgtgGGATGCGGAGGGTCCGGCGGCCGCTCATCTCGTGCGACATCAAGCTATACTCTAATAT	331	339	Nucleoprotein	http://www.ncbi.nlm.nih.gov/protein/P04851.1	Nucleoprotein	http://www.uniprot.org/uniprot/Q9WMB5	Measles virus strain Edmonston	http://purl.obolibrary.org/obo/NCBITaxon_11235	Measles morbillivirus	http://purl.obolibrary.org/obo/NCBITaxon_11234
37959	Linear peptide	LLWTLVVL	CTGCTGTGGACCCTGGTGGTGCTG	CAGGAGGGCTCGGCActgctgtggaccctggtggtgctgGGATGCGGAGGGTCCGGCGGCCGCTCATCTCGTGCGACATCAAGCTATACTCTAATATAGC	329	336	Latent membrane protein 2	http://www.ncbi.nlm.nih.gov/protein/P13285.1	Latent membrane protein 2	http://www.uniprot.org/uniprot/P13285	Human herpesvirus 4 strain B95-8	http://purl.obolibrary.org/obo/NCBITaxon_10377	Human gammaherpesvirus 4	http://purl.obolibrary.org/obo/NCBITaxon_10376
37960	Linear peptide	LLWTLVVLL	CTGCTGTGGACCCTGGTGGTGCTGCTG	CAGGAGGGCTCGGCActgctgtggaccctggtggtgctgctgGGATGCGGAGGGTCCGGCGGCCGCTCATCTCGTGCGACATCAAGCTATACTCTAATAT	197	205	Latent membrane protein 2	http://www.ncbi.nlm.nih.gov/protein/AAB59844.1	Latent membrane protein 2	http://www.uniprot.org/uniprot/P13285	Human gammaherpesvirus 4	http://purl.obolibrary.org/obo/NCBITaxon_10376	Human gammaherpesvirus 4	http://purl.obolibrary.org/obo/NCBITaxon_10376
37970	Linear peptide	LLYGYPVYV	CTGCTGTACGGCTACCCCGTGTACGTG	CAGGAGGGCTCGGCActgctgtacggctaccccgtgtacgtgGGATGCGGAGGGTCCGGCGGCCGCTCATCTCGTGCGACATCAAGCTATACTCTAATAT	11	19	Protein Tax-2	http://www.ncbi.nlm.nih.gov/protein/AAG48731.1	Protein Tax-2	http://www.uniprot.org/uniprot/P03410	Human T-lymphotropic virus 2	http://purl.obolibrary.org/obo/NCBITaxon_11909	Primate T-lymphotropic virus 2	http://purl.obolibrary.org/obo/NCBITaxon_194441
37988	Linear peptide	LLYSDDALHL	CTGCTGTACAGCGACGACGCCCTGCACCTG	CAGGAGGGCTCGGCActgctgtacagcgacgacgccctgcacctgGGATGCGGAGGGTCCGGCGGCCGCTCATCTCGTGCGACATCAAGCTATACTCTAA	398	407	Trans-sialidase, putative (UniProt:K4E505)	http://www.ncbi.nlm.nih.gov/protein/AAA30259.1	Trans-sialidase, putative	http://www.uniprot.org/uniprot/K4E505	Trypanosoma cruzi	http://purl.obolibrary.org/obo/NCBITaxon_5693	Trypanosoma cruzi	http://purl.obolibrary.org/obo/NCBITaxon_5693	Imported from the TopBank database.
38035	Linear peptide	LMHAPAFET	CTGATGCACGCCCCCGCCTTCGAGACC	CAGGAGGGCTCGGCActgatgcacgcccccgccttcgagaccGGATGCGGAGGGTCCGGCGGCCGCTCATCTCGTGCGACATCAAGCTATACTCTAATAT	177	185	Envelope glycoprotein D	http://www.ncbi.nlm.nih.gov/protein/Q69091.1	Envelope glycoprotein D	http://www.uniprot.org/uniprot/Q69091	Herpes simplex virus (type 1 / strain 17)	http://purl.obolibrary.org/obo/NCBITaxon_10299	Human alphaherpesvirus 1	http://purl.obolibrary.org/obo/NCBITaxon_10298
38042	Linear peptide	LMIDRPYVL	CTGATGATCGACAGGCCCTACGTGCTG	CAGGAGGGCTCGGCActgatgatcgacaggccctacgtgctgGGATGCGGAGGGTCCGGCGGCCGCTCATCTCGTGCGACATCAAGCTATACTCTAATAT	30	38	Hemagglutinin glycoprotein	http://www.ncbi.nlm.nih.gov/protein/P08362.1	Hemagglutinin glycoprotein	http://www.uniprot.org/uniprot/Q786F2	Measles morbillivirus	http://purl.obolibrary.org/obo/NCBITaxon_11234	Measles morbillivirus	http://purl.obolibrary.org/obo/NCBITaxon_11234
38049	Linear peptide	LMIGTAAAV	CTGATGATCGGCACCGCCGCCGCCGTG	CAGGAGGGCTCGGCActgatgatcggcaccgccgccgccgtgGGATGCGGAGGGTCCGGCGGCCGCTCATCTCGTGCGACATCAAGCTATACTCTAATAT	15	23	Diacylglycerol acyltransferase/mycolyltransferase Ag85B	http://www.ncbi.nlm.nih.gov/protein/P31952	Diacylglycerol acyltransferase/mycolyltransferase Ag85B	http://www.uniprot.org/uniprot/P9WQP1	Mycobacterium tuberculosis	http://purl.obolibrary.org/obo/NCBITaxon_1773	Mycobacterium tuberculosis	http://purl.obolibrary.org/obo/NCBITaxon_1773
38052	Linear peptide	LMIIPLINV	CTGATGATCATCCCCCTGATCAACGTG	CAGGAGGGCTCGGCActgatgatcatccccctgatcaacgtgGGATGCGGAGGGTCCGGCGGCCGCTCATCTCGTGCGACATCAAGCTATACTCTAATAT	542	550	Envelope glycoprotein H	http://www.ncbi.nlm.nih.gov/protein/P03231.1	Envelope glycoprotein H	http://www.uniprot.org/uniprot/P03231	Human herpesvirus 4 strain B95-8	http://purl.obolibrary.org/obo/NCBITaxon_10377	Human gammaherpesvirus 4	http://purl.obolibrary.org/obo/NCBITaxon_10376
38060	Linear peptide	LMLGEFLKL	CTGATGCTGGGCGAGTTCCTGAAGCTG	CAGGAGGGCTCGGCActgatgctgggcgagttcctgaagctgGGATGCGGAGGGTCCGGCGGCCGCTCATCTCGTGCGACATCAAGCTATACTCTAATAT	96	104	Baculoviral IAP repeat-containing protein 5	http://www.ncbi.nlm.nih.gov/protein/O15392.3	Baculoviral IAP repeat-containing protein 5	http://www.uniprot.org/uniprot/O15392	Homo sapiens	http://purl.obolibrary.org/obo/NCBITaxon_9606	Homo sapiens	http://purl.obolibrary.org/obo/NCBITaxon_9606	The epitope used was a modified version of the natural epitope. It was modified by replacing threonine at position 2 with methionine,a better anchor residue with improved binding affinityto the MHC molecule.	analog
38064	Linear peptide	LMLIWYRPV	CTGATGCTGATCTGGTACAGGCCCGTG	CAGGAGGGCTCGGCActgatgctgatctggtacaggcccgtgGGATGCGGAGGGTCCGGCGGCCGCTCATCTCGTGCGACATCAAGCTATACTCTAATAT	577	585	Macaca mulatta polyomavirus 1 protein	http://www.ncbi.nlm.nih.gov/protein/ABU86079.1			Macaca mulatta polyomavirus 1	http://purl.obolibrary.org/obo/NCBITaxon_1891767	Macaca mulatta polyomavirus 1	http://purl.obolibrary.org/obo/NCBITaxon_1891767
38079	Linear peptide	LMNGQQIFL	CTGATGAACGGCCAGCAGATCTTCCTG	CAGGAGGGCTCGGCActgatgaacggccagcagatcttcctgGGATGCGGAGGGTCCGGCGGCCGCTCATCTCGTGCGACATCAAGCTATACTCTAATAT	310	318	65 kDa phosphoprotein	http://www.ncbi.nlm.nih.gov/protein/AAA45994.1	65 kDa phosphoprotein	http://www.uniprot.org/uniprot/Q6SW59	Human betaherpesvirus 5	http://purl.obolibrary.org/obo/NCBITaxon_10359	Human betaherpesvirus 5	http://purl.obolibrary.org/obo/NCBITaxon_10359
38082	Linear peptide	LMNNAFEWI	CTGATGAACAACGCCTTCGAGTGGATC	CAGGAGGGCTCGGCActgatgaacaacgccttcgagtggatcGGATGCGGAGGGTCCGGCGGCCGCTCATCTCGTGCGACATCAAGCTATACTCTAATAT	189	197	Cysteine peptidase, putative,cysteine peptidase, clan CA, family C1, cathepsin L-like, putative (UniProt:K4DPT9)	http://www.ncbi.nlm.nih.gov/protein/A45629	Cysteine peptidase, putative,cysteine peptidase, clan CA, family C1, cathepsin L-like, putative	http://www.uniprot.org/uniprot/K4DPT9	Trypanosoma cruzi	http://purl.obolibrary.org/obo/NCBITaxon_5693	Trypanosoma cruzi	http://purl.obolibrary.org/obo/NCBITaxon_5693
38083	Linear peptide	LMNNAFEWIV	CTGATGAACAACGCCTTCGAGTGGATCGTG	CAGGAGGGCTCGGCActgatgaacaacgccttcgagtggatcgtgGGATGCGGAGGGTCCGGCGGCCGCTCATCTCGTGCGACATCAAGCTATACTCTAA	189	198	Cysteine peptidase, putative,cysteine peptidase, clan CA, family C1, cathepsin L-like, putative (UniProt:K4DPT9)	http://www.ncbi.nlm.nih.gov/protein/A45629	Cysteine peptidase, putative,cysteine peptidase, clan CA, family C1, cathepsin L-like, putative	http://www.uniprot.org/uniprot/K4DPT9	Trypanosoma cruzi	http://purl.obolibrary.org/obo/NCBITaxon_5693	Trypanosoma cruzi	http://purl.obolibrary.org/obo/NCBITaxon_5693
38152	Linear peptide	LMWDNVGLV	CTGATGTGGGACAACGTGGGCCTGGTG	CAGGAGGGCTCGGCActgatgtgggacaacgtgggcctggtgGGATGCGGAGGGTCCGGCGGCCGCTCATCTCGTGCGACATCAAGCTATACTCTAATAT	424	432	L-aspartate oxidase	http://www.ncbi.nlm.nih.gov/protein/YP_170403.1	L-aspartate oxidase	http://www.uniprot.org/uniprot/Q5NEY9	Francisella tularensis subsp. tularensis SCHU S4	http://purl.obolibrary.org/obo/NCBITaxon_177416	Francisella tularensis	http://purl.obolibrary.org/obo/NCBITaxon_263
38158	Linear peptide	LMWYELSKI	CTGATGTGGTACGAGCTGAGCAAGATC	CAGGAGGGCTCGGCActgatgtggtacgagctgagcaagatcGGATGCGGAGGGTCCGGCGGCCGCTCATCTCGTGCGACATCAAGCTATACTCTAATAT	492	500	Envelope glycoprotein B	http://www.ncbi.nlm.nih.gov/protein/AAB62592.1	Envelope glycoprotein B	http://www.uniprot.org/uniprot/F5HB81	Human gammaherpesvirus 8	http://purl.obolibrary.org/obo/NCBITaxon_37296	Human gammaherpesvirus 8	http://purl.obolibrary.org/obo/NCBITaxon_37296
38159	Linear peptide	LMWYELSKIN	CTGATGTGGTACGAGCTGAGCAAGATCAAC	CAGGAGGGCTCGGCActgatgtggtacgagctgagcaagatcaacGGATGCGGAGGGTCCGGCGGCCGCTCATCTCGTGCGACATCAAGCTATACTCTAA	492	501	Envelope glycoprotein B	http://www.ncbi.nlm.nih.gov/protein/AAB62592.1	Envelope glycoprotein B	http://www.uniprot.org/uniprot/F5HB81	Human gammaherpesvirus 8	http://purl.obolibrary.org/obo/NCBITaxon_37296	Human gammaherpesvirus 8	http://purl.obolibrary.org/obo/NCBITaxon_37296
38238	Linear peptide	LNIMNKLNI	CTGAACATCATGAACAAGCTGAACATC	CAGGAGGGCTCGGCActgaacatcatgaacaagctgaacatcGGATGCGGAGGGTCCGGCGGCCGCTCATCTCGTGCGACATCAAGCTATACTCTAATAT	129	137	Major core protein 4b	http://www.ncbi.nlm.nih.gov/protein/AAO89401.1	Major core protein 4b	http://www.uniprot.org/uniprot/P06440	Vaccinia virus WR	http://purl.obolibrary.org/obo/NCBITaxon_10254	Vaccinia virus	http://purl.obolibrary.org/obo/NCBITaxon_10245
38400	Linear peptide	LPAIVREAI	CTGCCCGCCATCGTGAGGGAGGCCATC	CAGGAGGGCTCGGCActgcccgccatcgtgagggaggccatcGGATGCGGAGGGTCCGGCGGCCGCTCATCTCGTGCGACATCAAGCTATACTCTAATAT	1680	1688	Genome polyprotein	http://www.ncbi.nlm.nih.gov/protein/ABG75765.1	Genome polyprotein	http://www.uniprot.org/uniprot/P17763	Dengue virus 1	http://purl.obolibrary.org/obo/NCBITaxon_11053	Dengue virus	http://purl.obolibrary.org/obo/NCBITaxon_12637
38881	Linear peptide	LQLPQGTTL	CTGCAGCTGCCCCAGGGCACCACCCTG	CAGGAGGGCTCGGCActgcagctgccccagggcaccaccctgGGATGCGGAGGGTCCGGCGGCCGCTCATCTCGTGCGACATCAAGCTATACTCTAATAT	160	168	Nucleoprotein	http://www.ncbi.nlm.nih.gov/protein/P59595.1	Nucleoprotein	http://www.uniprot.org/uniprot/P59595	SARS coronavirus	http://purl.obolibrary.org/obo/NCBITaxon_227859	SARS-related coronavirus	http://purl.obolibrary.org/obo/NCBITaxon_694009
39002	Linear peptide	LQTTIHDII	CTGCAGACCACCATCCACGACATCATC	CAGGAGGGCTCGGCActgcagaccaccatccacgacatcatcGGATGCGGAGGGTCCGGCGGCCGCTCATCTCGTGCGACATCAAGCTATACTCTAATAT	26	34	Protein E6	http://www.ncbi.nlm.nih.gov/protein/P03126.1	Protein E6	http://www.uniprot.org/uniprot/P03126	Human papillomavirus type 16	http://purl.obolibrary.org/obo/NCBITaxon_333760	Alphapapillomavirus 9	http://purl.obolibrary.org/obo/NCBITaxon_337041
39590	Linear peptide	LSPYYKRYISW	CTGAGCCCCTACTACAAGAGGTACATCAGCTGG	CAGGAGGGCTCGGCActgagcccctactacaagaggtacatcagctggGGATGCGGAGGGTCCGGCGGCCGCTCATCTCGTGCGACATCAAGCTATACTC	831	841	Genome polyprotein	http://www.ncbi.nlm.nih.gov/protein/AAY82030.1	Genome polyprotein	http://www.uniprot.org/uniprot/P27958	Hepatitis C virus	http://purl.obolibrary.org/obo/NCBITaxon_11103	Hepatitis C virus	http://purl.obolibrary.org/obo/NCBITaxon_11103
40262	Linear peptide	LVALLACLTV	CTGGTGGCCCTGCTGGCCTGCCTGACCGTG	CAGGAGGGCTCGGCActggtggccctgctggcctgcctgaccgtgGGATGCGGAGGGTCCGGCGGCCGCTCATCTCGTGCGACATCAAGCTATACTCTAA	8	17	Cytochrome P450 2A7	http://www.ncbi.nlm.nih.gov/protein/P20853.1	Cytochrome P450 2A7	http://www.uniprot.org/uniprot/P20853	Homo sapiens	http://purl.obolibrary.org/obo/NCBITaxon_9606	Homo sapiens	http://purl.obolibrary.org/obo/NCBITaxon_9606	The following refers to the epitope id as found in the original FIMM database: P001345
40264	Linear peptide	LVALLVCLTV	CTGGTGGCCCTGCTGGTGTGCCTGACCGTG	CAGGAGGGCTCGGCActggtggccctgctggtgtgcctgaccgtgGGATGCGGAGGGTCCGGCGGCCGCTCATCTCGTGCGACATCAAGCTATACTCTAA	8	17	Cytochrome P450 2A6	http://www.ncbi.nlm.nih.gov/protein/P11509.3	Cytochrome P450 2A6	http://www.uniprot.org/uniprot/P11509	Homo sapiens	http://purl.obolibrary.org/obo/NCBITaxon_9606	Homo sapiens	http://purl.obolibrary.org/obo/NCBITaxon_9606	The following refers to the epitope id as found in the original FIMM database: P001344
40375	Linear peptide	LVGPTPVNI	CTGGTGGGCCCCACCCCCGTGAACATC	CAGGAGGGCTCGGCActggtgggccccacccccgtgaacatcGGATGCGGAGGGTCCGGCGGCCGCTCATCTCGTGCGACATCAAGCTATACTCTAATAT	553	561	Gag-Pol polyprotein	http://www.ncbi.nlm.nih.gov/protein/BAC02534.1	Gag-Pol polyprotein	http://www.uniprot.org/uniprot/P04585	Human immunodeficiency virus 1	http://purl.obolibrary.org/obo/NCBITaxon_11676	Human immunodeficiency virus 1	http://purl.obolibrary.org/obo/NCBITaxon_11676
40468	Linear peptide	LVMAQLLRI	CTGGTGATGGCCCAGCTGCTGAGGATC	CAGGAGGGCTCGGCActggtgatggcccagctgctgaggatcGGATGCGGAGGGTCCGGCGGCCGCTCATCTCGTGCGACATCAAGCTATACTCTAATAT	332	340	Genome polyprotein	http://www.ncbi.nlm.nih.gov/protein/BAA00705.1	Genome polyprotein	http://www.uniprot.org/uniprot/P27958	Hepatitis C virus subtype 1a	http://purl.obolibrary.org/obo/NCBITaxon_31646	Hepatitis C virus	http://purl.obolibrary.org/obo/NCBITaxon_11103
40622	Linear peptide	LVVADLSFI	CTGGTGGTGGCCGACCTGAGCTTCATC	CAGGAGGGCTCGGCActggtggtggccgacctgagcttcatcGGATGCGGAGGGTCCGGCGGCCGCTCATCTCGTGCGACATCAAGCTATACTCTAATAT	150	158	16S/23S rRNA (cytidine-2'-O)-methyltransferase TlyA	http://www.ncbi.nlm.nih.gov/protein/NP_216210.1	16S/23S rRNA (cytidine-2'-O)-methyltransferase TlyA	http://www.uniprot.org/uniprot/P9WJ63	Mycobacterium tuberculosis	http://purl.obolibrary.org/obo/NCBITaxon_1773	Mycobacterium tuberculosis	http://purl.obolibrary.org/obo/NCBITaxon_1773
41745	Linear peptide	MIMQGGFSV	ATGATCATGCAGGGCGGCTTCAGCGTG	CAGGAGGGCTCGGCAatgatcatgcagggcggcttcagcgtgGGATGCGGAGGGTCCGGCGGCCGCTCATCTCGTGCGACATCAAGCTATACTCTAATAT	694	702	Proto-oncogene DBL	http://www.ncbi.nlm.nih.gov/protein/P10911.3	Proto-oncogene DBL	http://www.uniprot.org/uniprot/P10911	Homo sapiens	http://purl.obolibrary.org/obo/NCBITaxon_9606	Homo sapiens	http://purl.obolibrary.org/obo/NCBITaxon_9606
41748	Linear peptide	MINAYLDKL	ATGATCAACGCCTACCTGGACAAGCTG	CAGGAGGGCTCGGCAatgatcaacgcctacctggacaagctgGGATGCGGAGGGTCCGGCGGCCGCTCATCTCGTGCGACATCAAGCTATACTCTAATAT	523	531	STARP antigen	http://www.ncbi.nlm.nih.gov/protein/CAA81224.1	STARP antigen	http://www.uniprot.org/uniprot/Q8IC44	Plasmodium falciparum	http://purl.obolibrary.org/obo/NCBITaxon_5833	Plasmodium falciparum	http://purl.obolibrary.org/obo/NCBITaxon_5833	Data originally imported from the HLA Ligand Database and recurated.
41898	Linear peptide	MLAAQMFIV	ATGCTGGCCGCCCAGATGTTCATCGTG	CAGGAGGGCTCGGCAatgctggccgcccagatgttcatcgtgGGATGCGGAGGGTCCGGCGGCCGCTCATCTCGTGCGACATCAAGCTATACTCTAATAT	285	293	Genome polyprotein	http://www.ncbi.nlm.nih.gov/protein/AAF01178.1	Genome polyprotein	http://www.uniprot.org/uniprot/P27958	Hepatitis C virus subtype 2a	http://purl.obolibrary.org/obo/NCBITaxon_31649	Hepatitis C virus	http://purl.obolibrary.org/obo/NCBITaxon_11103
41919	Linear peptide	MLDLQPETT	ATGCTGGACCTGCAGCCCGAGACCACC	CAGGAGGGCTCGGCAatgctggacctgcagcccgagaccaccGGATGCGGAGGGTCCGGCGGCCGCTCATCTCGTGCGACATCAAGCTATACTCTAATAT	12	20	Protein E7	http://www.ncbi.nlm.nih.gov/protein/P03129.1	Protein E7	http://www.uniprot.org/uniprot/P03129	Human papillomavirus type 16	http://purl.obolibrary.org/obo/NCBITaxon_333760	Alphapapillomavirus 9	http://purl.obolibrary.org/obo/NCBITaxon_337041
41953	Linear peptide	MLGTHTMEV	ATGCTGGGCACCCACACCATGGAGGTG	CAGGAGGGCTCGGCAatgctgggcacccacaccatggaggtgGGATGCGGAGGGTCCGGCGGCCGCTCATCTCGTGCGACATCAAGCTATACTCTAATAT	185	193	Melanocyte protein PMEL	http://www.ncbi.nlm.nih.gov/protein/AAA35930.1	Melanocyte protein PMEL	http://www.uniprot.org/uniprot/P40967	Homo sapiens	http://purl.obolibrary.org/obo/NCBITaxon_9606	Homo sapiens	http://purl.obolibrary.org/obo/NCBITaxon_9606
41986	Linear peptide	MLLALIAVL	ATGCTGCTGGCCCTGATCGCCGTGCTG	CAGGAGGGCTCGGCAatgctgctggccctgatcgccgtgctgGGATGCGGAGGGTCCGGCGGCCGCTCATCTCGTGCGACATCAAGCTATACTCTAATAT	2150	2158	Genome polyprotein	http://www.ncbi.nlm.nih.gov/protein/ABK27927.1	Genome polyprotein	http://www.uniprot.org/uniprot/P17763	Dengue virus	http://purl.obolibrary.org/obo/NCBITaxon_12637	Dengue virus	http://purl.obolibrary.org/obo/NCBITaxon_12637
41989	Linear peptide	MLLAVLYCL	ATGCTGCTGGCCGTGCTGTACTGCCTG	CAGGAGGGCTCGGCAatgctgctggccgtgctgtactgcctgGGATGCGGAGGGTCCGGCGGCCGCTCATCTCGTGCGACATCAAGCTATACTCTAATAT	1	9	Tyrosinase	http://www.ncbi.nlm.nih.gov/protein/AAB60319.1	Tyrosinase	http://www.uniprot.org/uniprot/P14679	Homo sapiens	http://purl.obolibrary.org/obo/NCBITaxon_9606	Homo sapiens	http://purl.obolibrary.org/obo/NCBITaxon_9606
42013	Linear peptide	MLNIPSINV	ATGCTGAACATCCCCAGCATCAACGTG	CAGGAGGGCTCGGCAatgctgaacatccccagcatcaacgtgGGATGCGGAGGGTCCGGCGGCCGCTCATCTCGTGCGACATCAAGCTATACTCTAATAT	120	128	65 kDa phosphoprotein	http://www.ncbi.nlm.nih.gov/protein/CAA35357.1	65 kDa phosphoprotein	http://www.uniprot.org/uniprot/Q6SW59	Human betaherpesvirus 5	http://purl.obolibrary.org/obo/NCBITaxon_10359	Human betaherpesvirus 5	http://purl.obolibrary.org/obo/NCBITaxon_10359
42089	Linear peptide	MLVSQALNSV	ATGCTGGTGAGCCAGGCCCTGAACAGCGTG	CAGGAGGGCTCGGCAatgctggtgagccaggccctgaacagcgtgGGATGCGGAGGGTCCGGCGGCCGCTCATCTCGTGCGACATCAAGCTATACTCTAA	740	749	Major core protein 4a precursor	http://www.ncbi.nlm.nih.gov/protein/AAO89408.1	Major core protein 4a precursor	http://www.uniprot.org/uniprot/P16715	Vaccinia virus WR	http://purl.obolibrary.org/obo/NCBITaxon_10254	Vaccinia virus	http://purl.obolibrary.org/obo/NCBITaxon_10245
42094	Linear peptide	MLWGYLQYV	ATGCTGTGGGGCTACCTGCAGTACGTG	CAGGAGGGCTCGGCAatgctgtggggctacctgcagtacgtgGGATGCGGAGGGTCCGGCGGCCGCTCATCTCGTGCGACATCAAGCTATACTCTAATAT	549	557	Serine/threonine-protein kinase TEL1	http://www.ncbi.nlm.nih.gov/protein/EDV12172.1	Serine/threonine-protein kinase TEL1	http://www.uniprot.org/uniprot/P38110	Saccharomyces cerevisiae RM11-1a	http://purl.obolibrary.org/obo/NCBITaxon_285006	Saccharomyces cerevisiae	http://purl.obolibrary.org/obo/NCBITaxon_4932
42103	Linear peptide	MMAKEEELV	ATGATGGCCAAGGAGGAGGAGCTGGTG	CAGGAGGGCTCGGCAatgatggccaaggaggaggagctggtgGGATGCGGAGGGTCCGGCGGCCGCTCATCTCGTGCGACATCAAGCTATACTCTAATAT	847	855	Myosin-9	http://www.ncbi.nlm.nih.gov/protein/NP_002464.1	Myosin-9	http://www.uniprot.org/uniprot/P35579	Homo sapiens	http://purl.obolibrary.org/obo/NCBITaxon_9606	Homo sapiens	http://purl.obolibrary.org/obo/NCBITaxon_9606
42124	Linear peptide	MMIEEYPYV	ATGATGATCGAGGAGTACCCCTACGTG	CAGGAGGGCTCGGCAatgatgatcgaggagtacccctacgtgGGATGCGGAGGGTCCGGCGGCCGCTCATCTCGTGCGACATCAAGCTATACTCTAATAT	291	299	Der p 1	http://www.ncbi.nlm.nih.gov/protein/CAQ68250.1	Der p 1	http://www.uniprot.org/uniprot/P08176	Dermatophagoides pteronyssinus	http://purl.obolibrary.org/obo/NCBITaxon_6956	Dermatophagoides pteronyssinus	http://purl.obolibrary.org/obo/NCBITaxon_6956
42141	Linear peptide	MMLVPLITV	ATGATGCTGGTGCCCCTGATCACCGTG	CAGGAGGGCTCGGCAatgatgctggtgcccctgatcaccgtgGGATGCGGAGGGTCCGGCGGCCGCTCATCTCGTGCGACATCAAGCTATACTCTAATAT	1	9	Protein A36	http://www.ncbi.nlm.nih.gov/protein/AAO89438.1	Protein A36	http://www.uniprot.org/uniprot/P68619	Vaccinia virus WR	http://purl.obolibrary.org/obo/NCBITaxon_10254	Vaccinia virus	http://purl.obolibrary.org/obo/NCBITaxon_10245
42152	Linear peptide	MMMNWSPTT	ATGATGATGAACTGGAGCCCCACCACC	CAGGAGGGCTCGGCAatgatgatgaactggagccccaccaccGGATGCGGAGGGTCCGGCGGCCGCTCATCTCGTGCGACATCAAGCTATACTCTAATAT	322	330	Genome polyprotein	http://www.ncbi.nlm.nih.gov/protein/ABV46054.1	Genome polyprotein	http://www.uniprot.org/uniprot/P27958	Hepatitis C virus genotype 1	http://purl.obolibrary.org/obo/NCBITaxon_41856	Hepatitis C virus	http://purl.obolibrary.org/obo/NCBITaxon_11103	The epitope sequence is conserved among HCV genotypes 1a and 1b. The epitope is part of the E1 protein.
42171	Linear peptide	MMRKLAILSV	ATGATGAGGAAGCTGGCCATCCTGAGCGTG	CAGGAGGGCTCGGCAatgatgaggaagctggccatcctgagcgtgGGATGCGGAGGGTCCGGCGGCCGCTCATCTCGTGCGACATCAAGCTATACTCTAA	1	10	Circumsporozoite (CS) protein	http://www.ncbi.nlm.nih.gov/protein/NP_473175.2	Circumsporozoite (CS) protein	http://www.uniprot.org/uniprot/Q7K740	Plasmodium falciparum 3D7	http://purl.obolibrary.org/obo/NCBITaxon_36329	Plasmodium falciparum	http://purl.obolibrary.org/obo/NCBITaxon_5833
42262	Linear peptide	MPAYIRNTL	ATGCCCGCCTACATCAGGAACACCCTG	CAGGAGGGCTCGGCAatgcccgcctacatcaggaacaccctgGGATGCGGAGGGTCCGGCGGCCGCTCATCTCGTGCGACATCAAGCTATACTCTAATAT	303	311	DNA-directed RNA polymerase 147 kDa polypeptide	http://www.ncbi.nlm.nih.gov/protein/O57204.1	DNA-directed RNA polymerase 147 kDa polypeptide	http://www.uniprot.org/uniprot/P07392	Vaccinia virus Ankara	http://purl.obolibrary.org/obo/NCBITaxon_126794	Vaccinia virus	http://purl.obolibrary.org/obo/NCBITaxon_10245
42295	Linear peptide	MPNDPNRNV	ATGCCCAACGACCCCAACAGGAACGTG	CAGGAGGGCTCGGCAatgcccaacgaccccaacaggaacgtgGGATGCGGAGGGTCCGGCGGCCGCTCATCTCGTGCGACATCAAGCTATACTCTAATAT	300	308	Circumsporozoite (CS) protein	http://www.ncbi.nlm.nih.gov/protein/P02893.1	Circumsporozoite (CS) protein	http://www.uniprot.org/uniprot/Q7K740	Plasmodium falciparum	http://purl.obolibrary.org/obo/NCBITaxon_5833	Plasmodium falciparum	http://purl.obolibrary.org/obo/NCBITaxon_5833
42303	Linear peptide	MPNNPNRNV	ATGCCCAACAACCCCAACAGGAACGTG	CAGGAGGGCTCGGCAatgcccaacaaccccaacaggaacgtgGGATGCGGAGGGTCCGGCGGCCGCTCATCTCGTGCGACATCAAGCTATACTCTAATAT	5	13	Circumsporozoite (CS) protein	http://www.ncbi.nlm.nih.gov/protein/AAA29519.2	Circumsporozoite (CS) protein	http://www.uniprot.org/uniprot/Q7K740	Plasmodium falciparum	http://purl.obolibrary.org/obo/NCBITaxon_5833	Plasmodium falciparum	http://purl.obolibrary.org/obo/NCBITaxon_5833
42897	Linear peptide	MTYAAPLFV	ATGACCTACGCCGCCCCCCTGTTCGTG	CAGGAGGGCTCGGCAatgacctacgccgcccccctgttcgtgGGATGCGGAGGGTCCGGCGGCCGCTCATCTCGTGCGACATCAAGCTATACTCTAATAT	127	135	DNA-directed RNA polymerase subunit beta (UniProt:P9WGY9)	http://www.ncbi.nlm.nih.gov/protein/AAA21416.1	DNA-directed RNA polymerase subunit beta	http://www.uniprot.org/uniprot/P9WGY9	Mycobacterium tuberculosis	http://purl.obolibrary.org/obo/NCBITaxon_1773	Mycobacterium tuberculosis	http://purl.obolibrary.org/obo/NCBITaxon_1773
42921	Linear peptide	MVDGTLLLL	ATGGTGGACGGCACCCTGCTGCTGCTG	CAGGAGGGCTCGGCAatggtggacggcaccctgctgctgctgGGATGCGGAGGGTCCGGCGGCCGCTCATCTCGTGCGACATCAAGCTATACTCTAATAT	1	9	HLA class I histocompatibility antigen, alpha chain E	http://www.ncbi.nlm.nih.gov/protein/Q6DU44	HLA class I histocompatibility antigen, alpha chain E	http://www.uniprot.org/uniprot/P13747	Homo sapiens	http://purl.obolibrary.org/obo/NCBITaxon_9606	Homo sapiens	http://purl.obolibrary.org/obo/NCBITaxon_9606
42974	Linear peptide	MVMELIRMI	ATGGTGATGGAGCTGATCAGGATGATC	CAGGAGGGCTCGGCAatggtgatggagctgatcaggatgatcGGATGCGGAGGGTCCGGCGGCCGCTCATCTCGTGCGACATCAAGCTATACTCTAATAT	189	197	Nucleoprotein	http://www.ncbi.nlm.nih.gov/protein/AAT70629.1	Nucleoprotein	http://www.uniprot.org/uniprot/P03466	H5N1 subtype	http://purl.obolibrary.org/obo/NCBITaxon_102793	Influenza A virus	http://purl.obolibrary.org/obo/NCBITaxon_11320	The authors report that the epitope was synthesized based on strain H5N1-Thailand-human-2004.
43028	Linear peptide	MWYELSKIN	ATGTGGTACGAGCTGAGCAAGATCAAC	CAGGAGGGCTCGGCAatgtggtacgagctgagcaagatcaacGGATGCGGAGGGTCCGGCGGCCGCTCATCTCGTGCGACATCAAGCTATACTCTAATAT	493	501	Envelope glycoprotein B	http://www.ncbi.nlm.nih.gov/protein/AAB62592.1	Envelope glycoprotein B	http://www.uniprot.org/uniprot/F5HB81	Human gammaherpesvirus 8	http://purl.obolibrary.org/obo/NCBITaxon_37296	Human gammaherpesvirus 8	http://purl.obolibrary.org/obo/NCBITaxon_37296
43619	Linear peptide	NEGCGWAGW	AACGAGGGCTGCGGCTGGGCCGGCTGG	CAGGAGGGCTCGGCAaacgagggctgcggctgggccggctggGGATGCGGAGGGTCCGGCGGCCGCTCATCTCGTGCGACATCAAGCTATACTCTAATAT	88	96	Genome polyprotein	http://www.ncbi.nlm.nih.gov/protein/BAA00705.1	Genome polyprotein	http://www.uniprot.org/uniprot/P27958	Hepatitis C virus	http://purl.obolibrary.org/obo/NCBITaxon_11103	Hepatitis C virus	http://purl.obolibrary.org/obo/NCBITaxon_11103
44643	Linear peptide	NLAEDIMRL	AACCTGGCCGAGGACATCATGAGGCTG	CAGGAGGGCTCGGCAaacctggccgaggacatcatgaggctgGGATGCGGAGGGTCCGGCGGCCGCTCATCTCGTGCGACATCAAGCTATACTCTAATAT	177	185	Vimentin	http://www.ncbi.nlm.nih.gov/protein/AAA61279.1	Vimentin	http://www.uniprot.org/uniprot/P08670	Homo sapiens	http://purl.obolibrary.org/obo/NCBITaxon_9606	Homo sapiens	http://purl.obolibrary.org/obo/NCBITaxon_9606
44702	Linear peptide	NLFDIPLLTV	AACCTGTTCGACATCCCCCTGCTGACCGTG	CAGGAGGGCTCGGCAaacctgttcgacatccccctgctgaccgtgGGATGCGGAGGGTCCGGCGGCCGCTCATCTCGTGCGACATCAAGCTATACTCTAA	286	295	Protein F12	http://www.ncbi.nlm.nih.gov/protein/P21053.1	Protein F12	http://www.uniprot.org/uniprot/Q80HX6	Vaccinia virus Copenhagen	http://purl.obolibrary.org/obo/NCBITaxon_10249	Vaccinia virus	http://purl.obolibrary.org/obo/NCBITaxon_10245
44802	Linear peptide	NLLVTGFDT	AACCTGCTGGTGACCGGCTTCGACACC	CAGGAGGGCTCGGCAaacctgctggtgaccggcttcgacaccGGATGCGGAGGGTCCGGCGGCCGCTCATCTCGTGCGACATCAAGCTATACTCTAATAT	260	268	PE-PGRS family protein PE_PGRS62	http://www.ncbi.nlm.nih.gov/protein/ZP_02552202.1	PE-PGRS family protein PE_PGRS62	http://www.uniprot.org/uniprot/L7N680	Mycobacterium tuberculosis	http://purl.obolibrary.org/obo/NCBITaxon_1773	Mycobacterium tuberculosis	http://purl.obolibrary.org/obo/NCBITaxon_1773
44807	Linear peptide	NLMWYELSK	AACCTGATGTGGTACGAGCTGAGCAAG	CAGGAGGGCTCGGCAaacctgatgtggtacgagctgagcaagGGATGCGGAGGGTCCGGCGGCCGCTCATCTCGTGCGACATCAAGCTATACTCTAATAT	491	499	Envelope glycoprotein B	http://www.ncbi.nlm.nih.gov/protein/AAB62592.1	Envelope glycoprotein B	http://www.uniprot.org/uniprot/F5HB81	Human gammaherpesvirus 8	http://purl.obolibrary.org/obo/NCBITaxon_37296	Human gammaherpesvirus 8	http://purl.obolibrary.org/obo/NCBITaxon_37296
44808	Linear peptide	NLMWYELSKI	AACCTGATGTGGTACGAGCTGAGCAAGATC	CAGGAGGGCTCGGCAaacctgatgtggtacgagctgagcaagatcGGATGCGGAGGGTCCGGCGGCCGCTCATCTCGTGCGACATCAAGCTATACTCTAA	491	500	Envelope glycoprotein B	http://www.ncbi.nlm.nih.gov/protein/AAB62592.1	Envelope glycoprotein B	http://www.uniprot.org/uniprot/F5HB81	Human gammaherpesvirus 8	http://purl.obolibrary.org/obo/NCBITaxon_37296	Human gammaherpesvirus 8	http://purl.obolibrary.org/obo/NCBITaxon_37296
44812	Linear peptide	NLNDNAIHL	AACCTGAACGACAACGCCATCCACCTG	CAGGAGGGCTCGGCAaacctgaacgacaacgccatccacctgGGATGCGGAGGGTCCGGCGGCCGCTCATCTCGTGCGACATCAAGCTATACTCTAATAT	80	88	Thrombospondin-related anonymous protein, TRAP	http://www.ncbi.nlm.nih.gov/protein/P16893.1	Thrombospondin-related anonymous protein, TRAP	http://www.uniprot.org/uniprot/Q76NM2	Plasmodium falciparum	http://purl.obolibrary.org/obo/NCBITaxon_5833	Plasmodium falciparum	http://purl.obolibrary.org/obo/NCBITaxon_5833	Data originally imported from the HLA Ligand Database and recurated.
44814	Linear peptide	NLNESLIDL	AACCTGAACGAGAGCCTGATCGACCTG	CAGGAGGGCTCGGCAaacctgaacgagagcctgatcgacctgGGATGCGGAGGGTCCGGCGGCCGCTCATCTCGTGCGACATCAAGCTATACTCTAATAT	1174	1182	Spike glycoprotein	http://www.ncbi.nlm.nih.gov/protein/ABF65836.1	Spike glycoprotein	http://www.uniprot.org/uniprot/P59594	SARS coronavirus	http://purl.obolibrary.org/obo/NCBITaxon_227859	SARS-related coronavirus	http://purl.obolibrary.org/obo/NCBITaxon_694009
44833	Linear peptide	NLPGCSFSI	AACCTGCCCGGCTGCAGCTTCAGCATC	CAGGAGGGCTCGGCAaacctgcccggctgcagcttcagcatcGGATGCGGAGGGTCCGGCGGCCGCTCATCTCGTGCGACATCAAGCTATACTCTAATAT	168	176	Genome polyprotein	http://www.ncbi.nlm.nih.gov/protein/BAA03375.1	Genome polyprotein	http://www.uniprot.org/uniprot/P27958	Hepatitis C virus subtype 1a	http://purl.obolibrary.org/obo/NCBITaxon_31646	Hepatitis C virus	http://purl.obolibrary.org/obo/NCBITaxon_11103
44919	Linear peptide	NLVPIVATV	AACCTGGTGCCCATCGTGGCCACCGTG	CAGGAGGGCTCGGCAaacctggtgcccatcgtggccaccgtgGGATGCGGAGGGTCCGGCGGCCGCTCATCTCGTGCGACATCAAGCTATACTCTAATAT			65 kDa phosphoprotein	https://ontology.iedb.org/ontology/ONTIE_0002732	65 kDa phosphoprotein	http://www.uniprot.org/uniprot/Q6SW59	Human betaherpesvirus 5	http://purl.obolibrary.org/obo/NCBITaxon_10359	Human betaherpesvirus 5	http://purl.obolibrary.org/obo/NCBITaxon_10359	The following refers to the epitope id as found in the original FIMM database: P001490.Epitope has M499I mutation compared with wild-type epitope.
44920	Linear peptide	NLVPMVATV	AACCTGGTGCCCATGGTGGCCACCGTG	CAGGAGGGCTCGGCAaacctggtgcccatggtggccaccgtgGGATGCGGAGGGTCCGGCGGCCGCTCATCTCGTGCGACATCAAGCTATACTCTAATAT	485	493	65 kDa phosphoprotein	http://www.ncbi.nlm.nih.gov/protein/AAA45994.1	65 kDa phosphoprotein	http://www.uniprot.org/uniprot/Q6SW59	Human betaherpesvirus 5	http://purl.obolibrary.org/obo/NCBITaxon_10359	Human betaherpesvirus 5	http://purl.obolibrary.org/obo/NCBITaxon_10359
44948	Linear peptide	NLYPFVKTV	AACCTGTACCCCTTCGTGAAGACCGTG	CAGGAGGGCTCGGCAaacctgtaccccttcgtgaagaccgtgGGATGCGGAGGGTCCGGCGGCCGCTCATCTCGTGCGACATCAAGCTATACTCTAATAT	102	110	Bifunctional purine biosynthesis protein PURH	http://www.ncbi.nlm.nih.gov/protein/P31939.3	Bifunctional purine biosynthesis protein PURH	http://www.uniprot.org/uniprot/P31939	Homo sapiens	http://purl.obolibrary.org/obo/NCBITaxon_9606	Homo sapiens	http://purl.obolibrary.org/obo/NCBITaxon_9606
45001	Linear peptide	NMLSTVLGV	AACATGCTGAGCACCGTGCTGGGCGTG	CAGGAGGGCTCGGCAaacatgctgagcaccgtgctgggcgtgGGATGCGGAGGGTCCGGCGGCCGCTCATCTCGTGCGACATCAAGCTATACTCTAATAT	413	421	RNA-directed RNA polymerase catalytic subunit	http://www.ncbi.nlm.nih.gov/protein/P03431.1	RNA-directed RNA polymerase catalytic subunit	http://www.uniprot.org/uniprot/P03431	Influenza A virus (A/Puerto Rico/8/1934(H1N1))	http://purl.obolibrary.org/obo/NCBITaxon_211044	Influenza A virus	http://purl.obolibrary.org/obo/NCBITaxon_11320
45018	Linear peptide	NMPNDPNRNV	AACATGCCCAACGACCCCAACAGGAACGTG	CAGGAGGGCTCGGCAaacatgcccaacgaccccaacaggaacgtgGGATGCGGAGGGTCCGGCGGCCGCTCATCTCGTGCGACATCAAGCTATACTCTAA	284	293	Circumsporozoite (CS) protein	http://www.ncbi.nlm.nih.gov/protein/P19597.2	Circumsporozoite (CS) protein	http://www.uniprot.org/uniprot/Q7K740	Plasmodium falciparum NF54	http://purl.obolibrary.org/obo/NCBITaxon_5843	Plasmodium falciparum	http://purl.obolibrary.org/obo/NCBITaxon_5833
45552	Linear peptide	NQFPGFKEV	AACCAGTTCCCCGGCTTCAAGGAGGTG	CAGGAGGGCTCGGCAaaccagttccccggcttcaaggaggtgGGATGCGGAGGGTCCGGCGGCCGCTCATCTCGTGCGACATCAAGCTATACTCTAATAT	172	180	U2 small nuclear ribonucleoprotein B''	http://www.ncbi.nlm.nih.gov/protein/P08579.1	U2 small nuclear ribonucleoprotein B''	http://www.uniprot.org/uniprot/P08579	Homo sapiens	http://purl.obolibrary.org/obo/NCBITaxon_9606	Homo sapiens	http://purl.obolibrary.org/obo/NCBITaxon_9606
48321	Linear peptide	PLFGYPVYV	CCCCTGTTCGGCTACCCCGTGTACGTG	CAGGAGGGCTCGGCAcccctgttcggctaccccgtgtacgtgGGATGCGGAGGGTCCGGCGGCCGCTCATCTCGTGCGACATCAAGCTATACTCTAATAT	11	19	transcriptional activator Tax	http://www.ncbi.nlm.nih.gov/protein/AAG31572.1	Protein Tax-1	http://www.uniprot.org/uniprot/P14079	Human T-lymphotropic virus 1	http://purl.obolibrary.org/obo/NCBITaxon_11908	Primate T-lymphotropic virus 1	http://purl.obolibrary.org/obo/NCBITaxon_194440		analog
49485	Linear peptide	PSQEPMSIYVY	CCCAGCCAGGAGCCCATGAGCATCTACGTGTAC	CAGGAGGGCTCGGCAcccagccaggagcccatgagcatctacgtgtacGGATGCGGAGGGTCCGGCGGCCGCTCATCTCGTGCGACATCAAGCTATACTC	104	114	65 kDa phosphoprotein	http://www.ncbi.nlm.nih.gov/protein/CAA35357.1	65 kDa phosphoprotein	http://www.uniprot.org/uniprot/Q6SW59	Human betaherpesvirus 5	http://purl.obolibrary.org/obo/NCBITaxon_10359	Human betaherpesvirus 5	http://purl.obolibrary.org/obo/NCBITaxon_10359
50129	Linear peptide	PYLFWLAAI	CCCTACCTGTTCTGGCTGGCCGCCATC	CAGGAGGGCTCGGCAccctacctgttctggctggccgccatcGGATGCGGAGGGTCCGGCGGCCGCTCATCTCGTGCGACATCAAGCTATACTCTAATAT	131	139	Latent membrane protein 2	http://www.ncbi.nlm.nih.gov/protein/P0C729.1	Latent membrane protein 2	http://www.uniprot.org/uniprot/P13285	Human gammaherpesvirus 4	http://purl.obolibrary.org/obo/NCBITaxon_10376	Human gammaherpesvirus 4	http://purl.obolibrary.org/obo/NCBITaxon_10376
50596	Linear peptide	QEGAMHTAL	CAGGAGGGCGCCATGCACACCGCCCTG	CAGGAGGGCTCGGCAcaggagggcgccatgcacaccgccctgGGATGCGGAGGGTCCGGCGGCCGCTCATCTCGTGCGACATCAAGCTATACTCTAATAT	536	544	Genome polyprotein	http://www.ncbi.nlm.nih.gov/protein/ABG75765.1	Genome polyprotein	http://www.uniprot.org/uniprot/P17763	Dengue virus 1	http://purl.obolibrary.org/obo/NCBITaxon_11053	Dengue virus	http://purl.obolibrary.org/obo/NCBITaxon_12637
51311	Linear peptide	QLDPARDVL	CAGCTGGACCCCGCCAGGGACGTGCTG	CAGGAGGGCTCGGCAcagctggaccccgccagggacgtgctgGGATGCGGAGGGTCCGGCGGCCGCTCATCTCGTGCGACATCAAGCTATACTCTAATAT	8	16	Protein X	http://www.ncbi.nlm.nih.gov/protein/ABR68906.1	Protein X	http://www.uniprot.org/uniprot/Q69027	Hepatitis B virus	http://purl.obolibrary.org/obo/NCBITaxon_10407	Hepatitis B virus	http://purl.obolibrary.org/obo/NCBITaxon_10407
51342	Linear peptide	QLFNHTMFI	CAGCTGTTCAACCACACCATGTTCATC	CAGGAGGGCTCGGCAcagctgttcaaccacaccatgttcatcGGATGCGGAGGGTCCGGCGGCCGCTCATCTCGTGCGACATCAAGCTATACTCTAATAT	478	486	Myosin-9	http://www.ncbi.nlm.nih.gov/protein/NP_002464.1	Myosin-9	http://www.uniprot.org/uniprot/P35579	Homo sapiens	http://purl.obolibrary.org/obo/NCBITaxon_9606	Homo sapiens	http://purl.obolibrary.org/obo/NCBITaxon_9606
51351	Linear peptide	QLGAFLTNV	CAGCTGGGCGCCTTCCTGACCAACGTG	CAGGAGGGCTCGGCAcagctgggcgccttcctgaccaacgtgGGATGCGGAGGGTCCGGCGGCCGCTCATCTCGTGCGACATCAAGCTATACTCTAATAT	178	186	Protein Tax-1	http://www.ncbi.nlm.nih.gov/protein/AAG31572.1	Protein Tax-1	http://www.uniprot.org/uniprot/P14079	Human T-lymphotropic virus 1	http://purl.obolibrary.org/obo/NCBITaxon_11908	Primate T-lymphotropic virus 1	http://purl.obolibrary.org/obo/NCBITaxon_194440
51376	Linear peptide	QLIPCMDVVL	CAGCTGATCCCCTGCATGGACGTGGTGCTG	CAGGAGGGCTCGGCAcagctgatcccctgcatggacgtggtgctgGGATGCGGAGGGTCCGGCGGCCGCTCATCTCGTGCGACATCAAGCTATACTCTAA	143	152	Other Triticum aestivum (Canadian hard winter wheat) protein	http://www.ncbi.nlm.nih.gov/protein/P04721.1			Triticum aestivum	http://purl.obolibrary.org/obo/NCBITaxon_4565	Triticum aestivum	http://purl.obolibrary.org/obo/NCBITaxon_4565	Imported from the TopBank database.
51436	Linear peptide	QLLSSSKYT	CAGCTGCTGAGCAGCAGCAAGTACACC	CAGGAGGGCTCGGCAcagctgctgagcagcagcaagtacaccGGATGCGGAGGGTCCGGCGGCCGCTCATCTCGTGCGACATCAAGCTATACTCTAATAT	16	24	Nucleoprotein	http://www.ncbi.nlm.nih.gov/protein/P03418.1	Nucleoprotein	http://www.uniprot.org/uniprot/O42053	Human respiratory syncytial virus A strain Long	http://purl.obolibrary.org/obo/NCBITaxon_11260	Human orthopneumovirus	http://purl.obolibrary.org/obo/NCBITaxon_11250
51441	Linear peptide	QLMAEKLQL	CAGCTGATGGCCGAGAAGCTGCAGCTG	CAGGAGGGCTCGGCAcagctgatggccgagaagctgcagctgGGATGCGGAGGGTCCGGCGGCCGCTCATCTCGTGCGACATCAAGCTATACTCTAATAT	877	885	Myosin-9	http://www.ncbi.nlm.nih.gov/protein/P35579.4	Myosin-9	http://www.uniprot.org/uniprot/P35579	Homo sapiens	http://purl.obolibrary.org/obo/NCBITaxon_9606	Homo sapiens	http://purl.obolibrary.org/obo/NCBITaxon_9606
51459	Linear peptide	QLPEATFMV	CAGCTGCCCGAGGCCACCTTCATGGTG	CAGGAGGGCTCGGCAcagctgcccgaggccaccttcatggtgGGATGCGGAGGGTCCGGCGGCCGCTCATCTCGTGCGACATCAAGCTATACTCTAATAT	211	219	Matrix protein	http://www.ncbi.nlm.nih.gov/protein/BAB60864.1	Matrix protein	http://www.uniprot.org/uniprot/Q9W850	Measles virus strain Edmonston	http://purl.obolibrary.org/obo/NCBITaxon_11235	Measles morbillivirus	http://purl.obolibrary.org/obo/NCBITaxon_11234
51526	Linear peptide	QLRRHIDLLV	CAGCTGAGGAGGCACATCGACCTGCTGGTG	CAGGAGGGCTCGGCAcagctgaggaggcacatcgacctgctggtgGGATGCGGAGGGTCCGGCGGCCGCTCATCTCGTGCGACATCAAGCTATACTCTAA	257	266	Genome polyprotein	http://www.ncbi.nlm.nih.gov/protein/BAA00705.1	Genome polyprotein	http://www.uniprot.org/uniprot/P27958	Hepatitis C virus	http://purl.obolibrary.org/obo/NCBITaxon_11103	Hepatitis C virus	http://purl.obolibrary.org/obo/NCBITaxon_11103
51604	Linear peptide	QMDYSNGLFV	CAGATGGACTACAGCAACGGCCTGTTCGTG	CAGGAGGGCTCGGCAcagatggactacagcaacggcctgttcgtgGGATGCGGAGGGTCCGGCGGCCGCTCATCTCGTGCGACATCAAGCTATACTCTAA	610	619	Trans-sialidase, putative (UniProt:K4DPA8)	http://www.ncbi.nlm.nih.gov/protein/JH0823	Trans-sialidase, putative	http://www.uniprot.org/uniprot/K4DPA8	Trypanosoma cruzi	http://purl.obolibrary.org/obo/NCBITaxon_5693	Trypanosoma cruzi	http://purl.obolibrary.org/obo/NCBITaxon_5693
51657	Linear peptide	QMWKCLIRL	CAGATGTGGAAGTGCCTGATCAGGCTG	CAGGAGGGCTCGGCAcagatgtggaagtgcctgatcaggctgGGATGCGGAGGGTCCGGCGGCCGCTCATCTCGTGCGACATCAAGCTATACTCTAATAT	1606	1614	Genome polyprotein	http://www.ncbi.nlm.nih.gov/protein/ABV46054.1	Genome polyprotein	http://www.uniprot.org/uniprot/P27958	Hepatitis C virus genotype 1	http://purl.obolibrary.org/obo/NCBITaxon_41856	Hepatitis C virus	http://purl.obolibrary.org/obo/NCBITaxon_11103	The epitope sequence is conserved among HCV genotypes 1a and 1b. The epitope is part of the NS3 protein.
51658	Linear peptide	QMWQARLTV	CAGATGTGGCAGGCCAGGCTGACCGTG	CAGGAGGGCTCGGCAcagatgtggcaggccaggctgaccgtgGGATGCGGAGGGTCCGGCGGCCGCTCATCTCGTGCGACATCAAGCTATACTCTAATAT	155	163	65 kDa phosphoprotein	http://www.ncbi.nlm.nih.gov/protein/YP_081531.1	65 kDa phosphoprotein	http://www.uniprot.org/uniprot/Q6SW59	Human betaherpesvirus 5	http://purl.obolibrary.org/obo/NCBITaxon_10359	Human betaherpesvirus 5	http://purl.obolibrary.org/obo/NCBITaxon_10359
52886	Linear peptide	QYDPVAALF	CAGTACGACCCCGTGGCCGCCCTGTTC	CAGGAGGGCTCGGCAcagtacgaccccgtggccgccctgttcGGATGCGGAGGGTCCGGCGGCCGCTCATCTCGTGCGACATCAAGCTATACTCTAATAT	331	339	65 kDa phosphoprotein	http://www.ncbi.nlm.nih.gov/protein/AAA45994.1	65 kDa phosphoprotein	http://www.uniprot.org/uniprot/Q6SW59	Human betaherpesvirus 5	http://purl.obolibrary.org/obo/NCBITaxon_10359	Human betaherpesvirus 5	http://purl.obolibrary.org/obo/NCBITaxon_10359
53128	Linear peptide	RAKFKQLL	AGGGCCAAGTTCAAGCAGCTGCTG	CAGGAGGGCTCGGCAagggccaagttcaagcagctgctgGGATGCGGAGGGTCCGGCGGCCGCTCATCTCGTGCGACATCAAGCTATACTCTAATATAGC	190	197	Trans-activator protein BZLF1	http://www.ncbi.nlm.nih.gov/protein/P03206.2	Trans-activator protein BZLF1	http://www.uniprot.org/uniprot/P03206	Human gammaherpesvirus 4	http://purl.obolibrary.org/obo/NCBITaxon_10376	Human gammaherpesvirus 4	http://purl.obolibrary.org/obo/NCBITaxon_10376
53138	Linear peptide	RALAETSYV	AGGGCCCTGGCCGAGACCAGCTACGTG	CAGGAGGGCTCGGCAagggccctggccgagaccagctacgtgGGATGCGGAGGGTCCGGCGGCCGCTCATCTCGTGCGACATCAAGCTATACTCTAATAT	269	277	Melanoma-associated antigen 1	http://www.ncbi.nlm.nih.gov/protein/P43355.1	Melanoma-associated antigen 1	http://www.uniprot.org/uniprot/P43355	Homo sapiens	http://purl.obolibrary.org/obo/NCBITaxon_9606	Homo sapiens	http://purl.obolibrary.org/obo/NCBITaxon_9606
53399	Linear peptide	RDNLMWYEL	AGGGACAACCTGATGTGGTACGAGCTG	CAGGAGGGCTCGGCAagggacaacctgatgtggtacgagctgGGATGCGGAGGGTCCGGCGGCCGCTCATCTCGTGCGACATCAAGCTATACTCTAATAT	489	497	Envelope glycoprotein B	http://www.ncbi.nlm.nih.gov/protein/AAB62592.1	Envelope glycoprotein B	http://www.uniprot.org/uniprot/F5HB81	Human gammaherpesvirus 8	http://purl.obolibrary.org/obo/NCBITaxon_37296	Human gammaherpesvirus 8	http://purl.obolibrary.org/obo/NCBITaxon_37296
53935	Linear peptide	RGPGRAFVTI	AGGGGCCCCGGCAGGGCCTTCGTGACCATC	CAGGAGGGCTCGGCAaggggccccggcagggccttcgtgaccatcGGATGCGGAGGGTCCGGCGGCCGCTCATCTCGTGCGACATCAAGCTATACTCTAA	309	318	Envelope glycoprotein gp160	http://www.ncbi.nlm.nih.gov/protein/AAC28452.1	Envelope glycoprotein gp160	http://www.uniprot.org/uniprot/P04578	Human immunodeficiency virus 1	http://purl.obolibrary.org/obo/NCBITaxon_11676	Human immunodeficiency virus 1	http://purl.obolibrary.org/obo/NCBITaxon_11676
54147	Linear peptide	RIFAELEGV	AGGATCTTCGCCGAGCTGGAGGGCGTG	CAGGAGGGCTCGGCAaggatcttcgccgagctggagggcgtgGGATGCGGAGGGTCCGGCGGCCGCTCATCTCGTGCGACATCAAGCTATACTCTAATAT	522	530	65 kDa phosphoprotein	http://www.ncbi.nlm.nih.gov/protein/P06725.2	65 kDa phosphoprotein	http://www.uniprot.org/uniprot/Q6SW59	Human herpesvirus 5 strain AD169	http://purl.obolibrary.org/obo/NCBITaxon_10360	Human betaherpesvirus 5	http://purl.obolibrary.org/obo/NCBITaxon_10359	The authors cite Swiss-Prot accession P06725 (GI: 130714) as the source of the epitope.
54486	Linear peptide	RLAVYIDKV	AGGCTGGCCGTGTACATCGACAAGGTG	CAGGAGGGCTCGGCAaggctggccgtgtacatcgacaaggtgGGATGCGGAGGGTCCGGCGGCCGCTCATCTCGTGCGACATCAAGCTATACTCTAATAT	42	50	Lamin-B1	http://www.ncbi.nlm.nih.gov/protein/AAH12295.1	Lamin-B1	http://www.uniprot.org/uniprot/P20700	Homo sapiens	http://purl.obolibrary.org/obo/NCBITaxon_9606	Homo sapiens	http://purl.obolibrary.org/obo/NCBITaxon_9606
54487	Linear peptide	RLAVYIDRV	AGGCTGGCCGTGTACATCGACAGGGTG	CAGGAGGGCTCGGCAaggctggccgtgtacatcgacagggtgGGATGCGGAGGGTCCGGCGGCCGCTCATCTCGTGCGACATCAAGCTATACTCTAATAT	41	49	Prelamin-A/C	http://www.ncbi.nlm.nih.gov/protein/ABB04050.1	Prelamin-A/C	http://www.uniprot.org/uniprot/P02545	Homo sapiens	http://purl.obolibrary.org/obo/NCBITaxon_9606	Homo sapiens	http://purl.obolibrary.org/obo/NCBITaxon_9606
54501	Linear peptide	RLDDDGNFQL	AGGCTGGACGACGACGGCAACTTCCAGCTG	CAGGAGGGCTCGGCAaggctggacgacgacggcaacttccagctgGGATGCGGAGGGTCCGGCGGCCGCTCATCTCGTGCGACATCAAGCTATACTCTAA	78	87	Genome polyprotein	http://www.ncbi.nlm.nih.gov/protein/YP_001527883.1	Genome polyprotein	http://www.uniprot.org/uniprot/P14335	West Nile virus NY-99	https://ontology.iedb.org/ontology/ONTIE_0000839	West Nile virus	http://purl.obolibrary.org/obo/NCBITaxon_11082	The author provided GenBank identifier was GI:11597240.
54520	Linear peptide	RLERKWLDV	AGGCTGGAGAGGAAGTGGCTGGACGTG	CAGGAGGGCTCGGCAaggctggagaggaagtggctggacgtgGGATGCGGAGGGTCCGGCGGCCGCTCATCTCGTGCGACATCAAGCTATACTCTAATAT	210	218	Nucleoprotein	http://www.ncbi.nlm.nih.gov/protein/P04851.1	Nucleoprotein	http://www.uniprot.org/uniprot/Q9WMB5	Measles virus strain Edmonston	http://purl.obolibrary.org/obo/NCBITaxon_11235	Measles morbillivirus	http://purl.obolibrary.org/obo/NCBITaxon_11234
54549	Linear peptide	RLGAVILFV	AGGCTGGGCGCCGTGATCCTGTTCGTG	CAGGAGGGCTCGGCAaggctgggcgccgtgatcctgttcgtgGGATGCGGAGGGTCCGGCGGCCGCTCATCTCGTGCGACATCAAGCTATACTCTAATAT	7	15	Envelope glycoprotein D	http://www.ncbi.nlm.nih.gov/protein/Q69091.1	Envelope glycoprotein D	http://www.uniprot.org/uniprot/Q69091	Herpes simplex virus (type 1 / strain 17)	http://purl.obolibrary.org/obo/NCBITaxon_10299	Human alphaherpesvirus 1	http://purl.obolibrary.org/obo/NCBITaxon_10298
54587	Linear peptide	RLIGHISTL	AGGCTGATCGGCCACATCAGCACCCTG	CAGGAGGGCTCGGCAaggctgatcggccacatcagcaccctgGGATGCGGAGGGTCCGGCGGCCGCTCATCTCGTGCGACATCAAGCTATACTCTAATAT	345	353	Monooxygenase family protein	http://www.ncbi.nlm.nih.gov/protein/YP_170175.1	Monooxygenase family protein	http://www.uniprot.org/uniprot/Q5NFL7	Francisella tularensis subsp. tularensis SCHU S4	http://purl.obolibrary.org/obo/NCBITaxon_177416	Francisella tularensis	http://purl.obolibrary.org/obo/NCBITaxon_263
54592	Linear peptide	RLIQNSITI	AGGCTGATCCAGAACAGCATCACCATC	CAGGAGGGCTCGGCAaggctgatccagaacagcatcaccatcGGATGCGGAGGGTCCGGCGGCCGCTCATCTCGTGCGACATCAAGCTATACTCTAATAT	55	63	Nucleoprotein	http://www.ncbi.nlm.nih.gov/protein/AAT70629.1	Nucleoprotein	http://www.uniprot.org/uniprot/P03466	H5N1 subtype	http://purl.obolibrary.org/obo/NCBITaxon_102793	Influenza A virus	http://purl.obolibrary.org/obo/NCBITaxon_11320	The authors report that the epitope was synthesized based on strain H5N1-Thailand-human-2004.
54605	Linear peptide	RLIVFPDLGV	AGGCTGATCGTGTTCCCCGACCTGGGCGTG	CAGGAGGGCTCGGCAaggctgatcgtgttccccgacctgggcgtgGGATGCGGAGGGTCCGGCGGCCGCTCATCTCGTGCGACATCAAGCTATACTCTAA	2580	2589	Genome polyprotein	http://www.ncbi.nlm.nih.gov/protein/ACE82359.1	Genome polyprotein	http://www.uniprot.org/uniprot/P27958	Hepatitis C virus subtype 1a	http://purl.obolibrary.org/obo/NCBITaxon_31646	Hepatitis C virus	http://purl.obolibrary.org/obo/NCBITaxon_11103
54650	Linear peptide	RLLLLGLLLL	AGGCTGCTGCTGCTGGGCCTGCTGCTGCTG	CAGGAGGGCTCGGCAaggctgctgctgctgggcctgctgctgctgGGATGCGGAGGGTCCGGCGGCCGCTCATCTCGTGCGACATCAAGCTATACTCTAA	3013	3022	Genome polyprotein	http://www.ncbi.nlm.nih.gov/protein/AAU89634.1	Genome polyprotein	http://www.uniprot.org/uniprot/P27958	Hepatitis C virus subtype 2a	http://purl.obolibrary.org/obo/NCBITaxon_31649	Hepatitis C virus	http://purl.obolibrary.org/obo/NCBITaxon_11103
54654	Linear peptide	RLLPSLLLLL	AGGCTGCTGCCCAGCCTGCTGCTGCTGCTG	CAGGAGGGCTCGGCAaggctgctgcccagcctgctgctgctgctgGGATGCGGAGGGTCCGGCGGCCGCTCATCTCGTGCGACATCAAGCTATACTCTAA	873	882	Trans-sialidase, putative (UniProt:K4DTA6)	http://www.ncbi.nlm.nih.gov/protein/XP_816729.1	Trans-sialidase, putative	http://www.uniprot.org/uniprot/K4DTA6	Trypanosoma cruzi	http://purl.obolibrary.org/obo/NCBITaxon_5693	Trypanosoma cruzi	http://purl.obolibrary.org/obo/NCBITaxon_5693
54657	Linear peptide	RLLQTGIHV	AGGCTGCTGCAGACCGGCATCCACGTG	CAGGAGGGCTCGGCAaggctgctgcagaccggcatccacgtgGGATGCGGAGGGTCCGGCGGCCGCTCATCTCGTGCGACATCAAGCTATACTCTAATAT	40	48	65 kDa phosphoprotein	http://www.ncbi.nlm.nih.gov/protein/P06725.2	65 kDa phosphoprotein	http://www.uniprot.org/uniprot/Q6SW59	Human herpesvirus 5 strain AD169	http://purl.obolibrary.org/obo/NCBITaxon_10360	Human betaherpesvirus 5	http://purl.obolibrary.org/obo/NCBITaxon_10359	The authors cite Swiss-Prot accession P06725 (GI: 130714) as the source of the epitope.
54664	Linear peptide	RLLSPTTIV	AGGCTGCTGAGCCCCACCACCATCGTG	CAGGAGGGCTCGGCAaggctgctgagccccaccaccatcgtgGGATGCGGAGGGTCCGGCGGCCGCTCATCTCGTGCGACATCAAGCTATACTCTAATAT	120	128	Trans-sialidase, putative (UniProt:K4DPA8)	http://www.ncbi.nlm.nih.gov/protein/JH0823	Trans-sialidase, putative	http://www.uniprot.org/uniprot/K4DPA8	Trypanosoma cruzi	http://purl.obolibrary.org/obo/NCBITaxon_5693	Trypanosoma cruzi	http://purl.obolibrary.org/obo/NCBITaxon_5693
54672	Linear peptide	RLMKQDFSV	AGGCTGATGAAGCAGGACTTCAGCGTG	CAGGAGGGCTCGGCAaggctgatgaagcaggacttcagcgtgGGATGCGGAGGGTCCGGCGGCCGCTCATCTCGTGCGACATCAAGCTATACTCTAATAT	626	634	Melanocyte protein PMEL	http://www.ncbi.nlm.nih.gov/protein/AAA35930.1	Melanocyte protein PMEL	http://www.uniprot.org/uniprot/P40967	Homo sapiens	http://purl.obolibrary.org/obo/NCBITaxon_9606	Homo sapiens	http://purl.obolibrary.org/obo/NCBITaxon_9606
54680	Linear peptide	RLNEVAKNL	AGGCTGAACGAGGTGGCCAAGAACCTG	CAGGAGGGCTCGGCAaggctgaacgaggtggccaagaacctgGGATGCGGAGGGTCCGGCGGCCGCTCATCTCGTGCGACATCAAGCTATACTCTAATAT	1167	1175	Spike glycoprotein	http://www.ncbi.nlm.nih.gov/protein/P59594.1	Spike glycoprotein	http://www.uniprot.org/uniprot/P59594	SARS coronavirus BJ01	http://purl.obolibrary.org/obo/NCBITaxon_228407	SARS-related coronavirus	http://purl.obolibrary.org/obo/NCBITaxon_694009
54684	Linear peptide	RLNKVISEL	AGGCTGAACAAGGTGATCAGCGAGCTG	CAGGAGGGCTCGGCAaggctgaacaaggtgatcagcgagctgGGATGCGGAGGGTCCGGCGGCCGCTCATCTCGTGCGACATCAAGCTATACTCTAATAT	38	46	60S acidic ribosomal protein P2	http://www.ncbi.nlm.nih.gov/protein/P05387.1	60S acidic ribosomal protein P2	http://www.uniprot.org/uniprot/P05387	Homo sapiens	http://purl.obolibrary.org/obo/NCBITaxon_9606	Homo sapiens	http://purl.obolibrary.org/obo/NCBITaxon_9606
54690	Linear peptide	RLNQLESKV	AGGCTGAACCAGCTGGAGAGCAAGGTG	CAGGAGGGCTCGGCAaggctgaaccagctggagagcaaggtgGGATGCGGAGGGTCCGGCGGCCGCTCATCTCGTGCGACATCAAGCTATACTCTAATAT	227	235	Nucleoprotein	http://www.ncbi.nlm.nih.gov/protein/P59595.1	Nucleoprotein	http://www.uniprot.org/uniprot/P59595	SARS coronavirus	http://purl.obolibrary.org/obo/NCBITaxon_227859	SARS-related coronavirus	http://purl.obolibrary.org/obo/NCBITaxon_694009
54704	Linear peptide	RLPLVLPAV	AGGCTGCCCCTGGTGCTGCCCGCCGTG	CAGGAGGGCTCGGCAaggctgcccctggtgctgcccgccgtgGGATGCGGAGGGTCCGGCGGCCGCTCATCTCGTGCGACATCAAGCTATACTCTAATAT	163	171	Uncharacterized protein Rv2715	http://www.ncbi.nlm.nih.gov/protein/WP_015628351.1	Uncharacterized protein Rv2715	http://www.uniprot.org/uniprot/P9WNH3	Mycobacterium tuberculosis	http://purl.obolibrary.org/obo/NCBITaxon_1773	Mycobacterium tuberculosis	http://purl.obolibrary.org/obo/NCBITaxon_1773
54755	Linear peptide	RLSDNGYYTV	AGGCTGAGCGACAACGGCTACTACACCGTG	CAGGAGGGCTCGGCAaggctgagcgacaacggctactacaccgtgGGATGCGGAGGGTCCGGCGGCCGCTCATCTCGTGCGACATCAAGCTATACTCTAA	164	173	Matrix protein	http://www.ncbi.nlm.nih.gov/protein/AAF85695.1	Matrix protein	http://www.uniprot.org/uniprot/Q9W850	Measles virus strain Edmonston-B	http://purl.obolibrary.org/obo/NCBITaxon_70146	Measles morbillivirus	http://purl.obolibrary.org/obo/NCBITaxon_11234
54797	Linear peptide	RLTVSGLAWTR	AGGCTGACCGTGAGCGGCCTGGCCTGGACCAGG	CAGGAGGGCTCGGCAaggctgaccgtgagcggcctggcctggaccaggGGATGCGGAGGGTCCGGCGGCCGCTCATCTCGTGCGACATCAAGCTATACTC	160	170	65 kDa phosphoprotein	http://www.ncbi.nlm.nih.gov/protein/CAA35357.1	65 kDa phosphoprotein	http://www.uniprot.org/uniprot/Q6SW59	Human betaherpesvirus 5	http://purl.obolibrary.org/obo/NCBITaxon_10359	Human betaherpesvirus 5	http://purl.obolibrary.org/obo/NCBITaxon_10359
54821	Linear peptide	RLWHYPCTI	AGGCTGTGGCACTACCCCTGCACCATC	CAGGAGGGCTCGGCAaggctgtggcactacccctgcaccatcGGATGCGGAGGGTCCGGCGGCCGCTCATCTCGTGCGACATCAAGCTATACTCTAATAT	58	66	Genome polyprotein	http://www.ncbi.nlm.nih.gov/protein/AAM33354.1	Genome polyprotein	http://www.uniprot.org/uniprot/P27958	Hepatitis C virus subtype 1a	http://purl.obolibrary.org/obo/NCBITaxon_31646	Hepatitis C virus	http://purl.obolibrary.org/obo/NCBITaxon_11103
54825	Linear peptide	RLWHYPCTV	AGGCTGTGGCACTACCCCTGCACCGTG	CAGGAGGGCTCGGCAaggctgtggcactacccctgcaccgtgGGATGCGGAGGGTCCGGCGGCCGCTCATCTCGTGCGACATCAAGCTATACTCTAATAT	614	622	Genome polyprotein	http://www.ncbi.nlm.nih.gov/protein/ABV46054.1	Genome polyprotein	http://www.uniprot.org/uniprot/P27958	Hepatitis C virus genotype 1	http://purl.obolibrary.org/obo/NCBITaxon_41856	Hepatitis C virus	http://purl.obolibrary.org/obo/NCBITaxon_11103	The epitope sequence is conserved among HCV genotypes 1a and 1b. The epitope is part of the E2 protein.
54832	Linear peptide	RLYDYFTRV	AGGCTGTACGACTACTTCACCAGGGTG	CAGGAGGGCTCGGCAaggctgtacgactacttcaccagggtgGGATGCGGAGGGTCCGGCGGCCGCTCATCTCGTGCGACATCAAGCTATACTCTAATAT	211	219	Telomere-binding protein I1	http://www.ncbi.nlm.nih.gov/protein/AAO89349.1	Telomere-binding protein I1	http://www.uniprot.org/uniprot/P16714	Vaccinia virus WR	http://purl.obolibrary.org/obo/NCBITaxon_10254	Vaccinia virus	http://purl.obolibrary.org/obo/NCBITaxon_10245
54882	Linear peptide	RMFPNAPYL	AGGATGTTCCCCAACGCCCCCTACCTG	CAGGAGGGCTCGGCAaggatgttccccaacgccccctacctgGGATGCGGAGGGTCCGGCGGCCGCTCATCTCGTGCGACATCAAGCTATACTCTAATAT	126	134	Wilms tumor protein	http://www.ncbi.nlm.nih.gov/protein/P19544.2	Wilms tumor protein	http://www.uniprot.org/uniprot/P19544	Homo sapiens	http://purl.obolibrary.org/obo/NCBITaxon_9606	Homo sapiens	http://purl.obolibrary.org/obo/NCBITaxon_9606
54888	Linear peptide	RMGAVTTEV	AGGATGGGCGCCGTGACCACCGAGGTG	CAGGAGGGCTCGGCAaggatgggcgccgtgaccaccgaggtgGGATGCGGAGGGTCCGGCGGCCGCTCATCTCGTGCGACATCAAGCTATACTCTAATAT	134	142	Matrix protein 1	http://www.ncbi.nlm.nih.gov/protein/ABO21712.1	Matrix protein 1	http://www.uniprot.org/uniprot/P03485	Influenza A virus (A/Puerto Rico/8/1934(H1N1))	http://purl.obolibrary.org/obo/NCBITaxon_211044	Influenza A virus	http://purl.obolibrary.org/obo/NCBITaxon_11320
54920	Linear peptide	RMLPHAPGV	AGGATGCTGCCCCACGCCCCCGGCGTG	CAGGAGGGCTCGGCAaggatgctgccccacgcccccggcgtgGGATGCGGAGGGTCCGGCGGCCGCTCATCTCGTGCGACATCAAGCTATACTCTAATAT	371	379	Histone deacetylase 1 (UniProt:Q13547)	http://www.ncbi.nlm.nih.gov/protein/Q13547.1	Histone deacetylase 1	http://www.uniprot.org/uniprot/Q13547	Homo sapiens	http://purl.obolibrary.org/obo/NCBITaxon_9606	Homo sapiens	http://purl.obolibrary.org/obo/NCBITaxon_9606
54949	Linear peptide	RMSKGVFKV	AGGATGAGCAAGGGCGTGTTCAAGGTG	CAGGAGGGCTCGGCAaggatgagcaagggcgtgttcaaggtgGGATGCGGAGGGTCCGGCGGCCGCTCATCTCGTGCGACATCAAGCTATACTCTAATAT	1520	1528	RNA-directed RNA polymerase L	http://www.ncbi.nlm.nih.gov/protein/ABY21184.1	RNA-directed RNA polymerase L	http://www.uniprot.org/uniprot/Q9WMB3	Measles morbillivirus	http://purl.obolibrary.org/obo/NCBITaxon_11234	Measles morbillivirus	http://purl.obolibrary.org/obo/NCBITaxon_11234
55029	Linear peptide	RNLVPMVATVQ	AGGAACCTGGTGCCCATGGTGGCCACCGTGCAG	CAGGAGGGCTCGGCAaggaacctggtgcccatggtggccaccgtgcagGGATGCGGAGGGTCCGGCGGCCGCTCATCTCGTGCGACATCAAGCTATACTC	494	504	65 kDa phosphoprotein	http://www.ncbi.nlm.nih.gov/protein/CAA35357.1	65 kDa phosphoprotein	http://www.uniprot.org/uniprot/Q6SW59	Human betaherpesvirus 5	http://purl.obolibrary.org/obo/NCBITaxon_10359	Human betaherpesvirus 5	http://purl.obolibrary.org/obo/NCBITaxon_10359
55170	Linear peptide	RPHERNGFTVL	AGGCCCCACGAGAGGAACGGCTTCACCGTGCTG	CAGGAGGGCTCGGCAaggccccacgagaggaacggcttcaccgtgctgGGATGCGGAGGGTCCGGCGGCCGCTCATCTCGTGCGACATCAAGCTATACTC	255	265	65 kDa phosphoprotein	http://www.ncbi.nlm.nih.gov/protein/AAA45994.1	65 kDa phosphoprotein	http://www.uniprot.org/uniprot/Q6SW59	Human betaherpesvirus 5	http://purl.obolibrary.org/obo/NCBITaxon_10359	Human betaherpesvirus 5	http://purl.obolibrary.org/obo/NCBITaxon_10359
55235	Linear peptide	RPMSLRSTII	AGGCCCATGAGCCTGAGGAGCACCATCATC	CAGGAGGGCTCGGCAaggcccatgagcctgaggagcaccatcatcGGATGCGGAGGGTCCGGCGGCCGCTCATCTCGTGCGACATCAAGCTATACTCTAA	335	344	Protein O1	http://www.ncbi.nlm.nih.gov/protein/CAM58238.1	Protein O1	http://www.uniprot.org/uniprot/Q80HX1	Vaccinia virus Ankara	http://purl.obolibrary.org/obo/NCBITaxon_126794	Vaccinia virus	http://purl.obolibrary.org/obo/NCBITaxon_10245
55779	Linear peptide	RRYPDAVYL	AGGAGGTACCCCGACGCCGTGTACCTG	CAGGAGGGCTCGGCAaggaggtaccccgacgccgtgtacctgGGATGCGGAGGGTCCGGCGGCCGCTCATCTCGTGCGACATCAAGCTATACTCTAATAT	438	446	Fusion glycoprotein F0	http://www.ncbi.nlm.nih.gov/protein/BAB60865.1	Fusion glycoprotein F0	http://www.uniprot.org/uniprot/Q786F3	Measles virus strain Edmonston	http://purl.obolibrary.org/obo/NCBITaxon_11235	Measles morbillivirus	http://purl.obolibrary.org/obo/NCBITaxon_11234
56343	Linear peptide	RVLEDGVNYA	AGGGTGCTGGAGGACGGCGTGAACTACGCC	CAGGAGGGCTCGGCAagggtgctggaggacggcgtgaactacgccGGATGCGGAGGGTCCGGCGGCCGCTCATCTCGTGCGACATCAAGCTATACTCTAA	156	165	Genome polyprotein	http://www.ncbi.nlm.nih.gov/protein/BAA00705.1	Genome polyprotein	http://www.uniprot.org/uniprot/P27958	Hepatitis C virus	http://purl.obolibrary.org/obo/NCBITaxon_11103	Hepatitis C virus	http://purl.obolibrary.org/obo/NCBITaxon_11103
56375	Linear peptide	RVPGVAPTL	AGGGTGCCCGGCGTGGCCCCCACCCTG	CAGGAGGGCTCGGCAagggtgcccggcgtggcccccaccctgGGATGCGGAGGGTCCGGCGGCCGCTCATCTCGTGCGACATCAAGCTATACTCTAATAT	302	310	Wilms tumor protein	http://www.ncbi.nlm.nih.gov/protein/P19544.2	Wilms tumor protein	http://www.uniprot.org/uniprot/P19544	Homo sapiens	http://purl.obolibrary.org/obo/NCBITaxon_9606	Homo sapiens	http://purl.obolibrary.org/obo/NCBITaxon_9606
56456	Linear peptide	RVYEALYYV	AGGGTGTACGAGGCCCTGTACTACGTG	CAGGAGGGCTCGGCAagggtgtacgaggccctgtactacgtgGGATGCGGAGGGTCCGGCGGCCGCTCATCTCGTGCGACATCAAGCTATACTCTAATAT	251	259	mRNA-capping enzyme regulatory subunit	http://www.ncbi.nlm.nih.gov/protein/CAM58287.1	mRNA-capping enzyme regulatory subunit	http://www.uniprot.org/uniprot/P04318	Vaccinia virus Ankara	http://purl.obolibrary.org/obo/NCBITaxon_126794	Vaccinia virus	http://purl.obolibrary.org/obo/NCBITaxon_10245
57364	Linear peptide	SECTTPCSGSW	AGCGAGTGCACCACCCCCTGCAGCGGCAGCTGG	CAGGAGGGCTCGGCAagcgagtgcaccaccccctgcagcggcagctggGGATGCGGAGGGTCCGGCGGCCGCTCATCTCGTGCGACATCAAGCTATACTC	1966	1976	Genome polyprotein	http://www.ncbi.nlm.nih.gov/protein/P26664.3	Genome polyprotein	http://www.uniprot.org/uniprot/P27958	Hepatitis C virus	http://purl.obolibrary.org/obo/NCBITaxon_11103	Hepatitis C virus	http://purl.obolibrary.org/obo/NCBITaxon_11103
57790	Linear peptide	SFHSLHLLF	AGCTTCCACAGCCTGCACCTGCTGTTC	CAGGAGGGCTCGGCAagcttccacagcctgcacctgctgttcGGATGCGGAGGGTCCGGCGGCCGCTCATCTCGTGCGACATCAAGCTATACTCTAATAT	301	309	Protein Tax-1	http://www.ncbi.nlm.nih.gov/protein/AAG31572.1	Protein Tax-1	http://www.uniprot.org/uniprot/P14079	Human T-lymphotropic virus 1	http://purl.obolibrary.org/obo/NCBITaxon_11908	Primate T-lymphotropic virus 1	http://purl.obolibrary.org/obo/NCBITaxon_194440
58547	Linear peptide	SIIGRLLEV	AGCATCATCGGCAGGCTGCTGGAGGTG	CAGGAGGGCTCGGCAagcatcatcggcaggctgctggaggtgGGATGCGGAGGGTCCGGCGGCCGCTCATCTCGTGCGACATCAAGCTATACTCTAATAT	11	19	Serine/threonine-protein phosphatase PP1-alpha catalytic subunit	http://www.ncbi.nlm.nih.gov/protein/NP_002699.1	Serine/threonine-protein phosphatase PP1-alpha catalytic subunit	http://www.uniprot.org/uniprot/P62136	Homo sapiens	http://purl.obolibrary.org/obo/NCBITaxon_9606	Homo sapiens	http://purl.obolibrary.org/obo/NCBITaxon_9606
58721	Linear peptide	SITEVECFL	AGCATCACCGAGGTGGAGTGCTTCCTG	CAGGAGGGCTCGGCAagcatcaccgaggtggagtgcttcctgGGATGCGGAGGGTCCGGCGGCCGCTCATCTCGTGCGACATCAAGCTATACTCTAATAT	36	44	Human polyomavirus 2 protein	http://www.ncbi.nlm.nih.gov/protein/AAL37677.1			JC polyomavirus	http://purl.obolibrary.org/obo/NCBITaxon_10632	Human polyomavirus 2	http://purl.obolibrary.org/obo/NCBITaxon_1891763
58730	Linear peptide	SIVAYTMSL	AGCATCGTGGCCTACACCATGAGCCTG	CAGGAGGGCTCGGCAagcatcgtggcctacaccatgagcctgGGATGCGGAGGGTCCGGCGGCCGCTCATCTCGTGCGACATCAAGCTATACTCTAATAT	673	681	Spike glycoprotein	http://www.ncbi.nlm.nih.gov/protein/ABF65836.1	Spike glycoprotein	http://www.uniprot.org/uniprot/P59594	SARS coronavirus	http://purl.obolibrary.org/obo/NCBITaxon_227859	SARS-related coronavirus	http://purl.obolibrary.org/obo/NCBITaxon_694009
58740	Linear peptide	SIVSPFIPLL	AGCATCGTGAGCCCCTTCATCCCCCTGCTG	CAGGAGGGCTCGGCAagcatcgtgagccccttcatccccctgctgGGATGCGGAGGGTCCGGCGGCCGCTCATCTCGTGCGACATCAAGCTATACTCTAA	370	379	Large envelope protein	http://www.ncbi.nlm.nih.gov/protein/AAK97183.1	Large envelope protein	http://www.uniprot.org/uniprot/Q76R62	Hepatitis B virus	http://purl.obolibrary.org/obo/NCBITaxon_10407	Hepatitis B virus	http://purl.obolibrary.org/obo/NCBITaxon_10407
58778	Linear peptide	SIYVYALPL	AGCATCTACGTGTACGCCCTGCCCCTG	CAGGAGGGCTCGGCAagcatctacgtgtacgccctgcccctgGGATGCGGAGGGTCCGGCGGCCGCTCATCTCGTGCGACATCAAGCTATACTCTAATAT	110	118	65 kDa phosphoprotein	http://www.ncbi.nlm.nih.gov/protein/P06725.2	65 kDa phosphoprotein	http://www.uniprot.org/uniprot/Q6SW59	Human herpesvirus 5 strain AD169	http://purl.obolibrary.org/obo/NCBITaxon_10360	Human betaherpesvirus 5	http://purl.obolibrary.org/obo/NCBITaxon_10359	The authors cite Swiss-Prot accession P06725 (GI: 130714) as the source of the epitope.
58987	Linear peptide	SLADTNSLAV	AGCCTGGCCGACACCAACAGCCTGGCCGTG	CAGGAGGGCTCGGCAagcctggccgacaccaacagcctggccgtgGGATGCGGAGGGTCCGGCGGCCGCTCATCTCGTGCGACATCAAGCTATACTCTAA	577	586	Melanocyte protein PMEL	http://www.ncbi.nlm.nih.gov/protein/AAA35930.1	Melanocyte protein PMEL	http://www.uniprot.org/uniprot/P40967	Homo sapiens	http://purl.obolibrary.org/obo/NCBITaxon_9606	Homo sapiens	http://purl.obolibrary.org/obo/NCBITaxon_9606
58995	Linear peptide	SLAGGIIGV	AGCCTGGCCGGCGGCATCATCGGCGTG	CAGGAGGGCTCGGCAagcctggccggcggcatcatcggcgtgGGATGCGGAGGGTCCGGCGGCCGCTCATCTCGTGCGACATCAAGCTATACTCTAATAT	154	162	Heterogeneous nuclear ribonucleoprotein K	http://www.ncbi.nlm.nih.gov/protein/CAI16021.1	Heterogeneous nuclear ribonucleoprotein K	http://www.uniprot.org/uniprot/P61978	Homo sapiens	http://purl.obolibrary.org/obo/NCBITaxon_9606	Homo sapiens	http://purl.obolibrary.org/obo/NCBITaxon_9606
59031	Linear peptide	SLCPIRGWAI	AGCCTGTGCCCCATCAGGGGCTGGGCCATC	CAGGAGGGCTCGGCAagcctgtgccccatcaggggctgggccatcGGATGCGGAGGGTCCGGCGGCCGCTCATCTCGTGCGACATCAAGCTATACTCTAA	75	84	Neuraminidase	http://www.ncbi.nlm.nih.gov/protein/P03468.2	Neuraminidase	http://www.uniprot.org/uniprot/P03468	Influenza A virus (A/Puerto Rico/8/1934(H1N1))	http://purl.obolibrary.org/obo/NCBITaxon_211044	Influenza A virus	http://purl.obolibrary.org/obo/NCBITaxon_11320
59035	Linear peptide	SLDDYNHLV	AGCCTGGACGACTACAACCACCTGGTG	CAGGAGGGCTCGGCAagcctggacgactacaaccacctggtgGGATGCGGAGGGTCCGGCGGCCGCTCATCTCGTGCGACATCAAGCTATACTCTAATAT	288	296	L-dopachrome tautomerase	http://www.ncbi.nlm.nih.gov/protein/NP_001913.2	L-dopachrome tautomerase	http://www.uniprot.org/uniprot/P40126	Homo sapiens	http://purl.obolibrary.org/obo/NCBITaxon_9606	Homo sapiens	http://purl.obolibrary.org/obo/NCBITaxon_9606
59038	Linear peptide	SLDLAEQEL	AGCCTGGACCTGGCCGAGCAGGAGCTG	CAGGAGGGCTCGGCAagcctggacctggccgagcaggagctgGGATGCGGAGGGTCCGGCGGCCGCTCATCTCGTGCGACATCAAGCTATACTCTAATAT	134	142	Der p 1	http://www.ncbi.nlm.nih.gov/protein/CAQ68250.1	Der p 1	http://www.uniprot.org/uniprot/P08176	Dermatophagoides pteronyssinus	http://purl.obolibrary.org/obo/NCBITaxon_6956	Dermatophagoides pteronyssinus	http://purl.obolibrary.org/obo/NCBITaxon_6956
59069	Linear peptide	SLENFRAYV	AGCCTGGAGAACTTCAGGGCCTACGTG	CAGGAGGGCTCGGCAagcctggagaacttcagggcctacgtgGGATGCGGAGGGTCCGGCGGCCGCTCATCTCGTGCGACATCAAGCTATACTCTAATAT	225	233	Polymerase acidic protein	https://ontology.iedb.org/ontology/ONTIE_0002031	Polymerase acidic protein	http://www.uniprot.org/uniprot/P03433	Influenza A virus (A/Puerto Rico/8/1934(H1N1))	http://purl.obolibrary.org/obo/NCBITaxon_211044	Influenza A virus	http://purl.obolibrary.org/obo/NCBITaxon_11320
59088	Linear peptide	SLFGGMSWI	AGCCTGTTCGGCGGCATGAGCTGGATC	CAGGAGGGCTCGGCAagcctgttcggcggcatgagctggatcGGATGCGGAGGGTCCGGCGGCCGCTCATCTCGTGCGACATCAAGCTATACTCTAATAT	738	746	Genome polyprotein	http://www.ncbi.nlm.nih.gov/protein/NP_041724.2	Genome polyprotein	http://www.uniprot.org/uniprot/P14335	West Nile virus	http://purl.obolibrary.org/obo/NCBITaxon_11082	West Nile virus	http://purl.obolibrary.org/obo/NCBITaxon_11082
59089	Linear peptide	SLFGQRIEV	AGCCTGTTCGGCCAGAGGATCGAGGTG	CAGGAGGGCTCGGCAagcctgttcggccagaggatcgaggtgGGATGCGGAGGGTCCGGCGGCCGCTCATCTCGTGCGACATCAAGCTATACTCTAATAT	15	23	Genome polyprotein	http://www.ncbi.nlm.nih.gov/protein/YP_001527886.1	Genome polyprotein	http://www.uniprot.org/uniprot/P14335	West Nile virus NY-99	https://ontology.iedb.org/ontology/ONTIE_0000839	West Nile virus	http://purl.obolibrary.org/obo/NCBITaxon_11082	The author provided GenBank identifier was GI:11597240.
59093	Linear peptide	SLFKNVRLL	AGCCTGTTCAAGAACGTGAGGCTGCTG	CAGGAGGGCTCGGCAagcctgttcaagaacgtgaggctgctgGGATGCGGAGGGTCCGGCGGCCGCTCATCTCGTGCGACATCAAGCTATACTCTAATAT	174	182	mRNA-capping enzyme regulatory subunit	http://www.ncbi.nlm.nih.gov/protein/P20980.1	mRNA-capping enzyme regulatory subunit	http://www.uniprot.org/uniprot/P04318	Vaccinia virus Copenhagen	http://purl.obolibrary.org/obo/NCBITaxon_10249	Vaccinia virus	http://purl.obolibrary.org/obo/NCBITaxon_10245
59100	Linear peptide	SLFPGKLEV	AGCCTGTTCCCCGGCAAGCTGGAGGTG	CAGGAGGGCTCGGCAagcctgttccccggcaagctggaggtgGGATGCGGAGGGTCCGGCGGCCGCTCATCTCGTGCGACATCAAGCTATACTCTAATAT	1010	1018	Protein flightless-1 homolog	http://www.ncbi.nlm.nih.gov/protein/Q13045.2	Protein flightless-1 homolog	http://www.uniprot.org/uniprot/Q13045	Homo sapiens	http://purl.obolibrary.org/obo/NCBITaxon_9606	Homo sapiens	http://purl.obolibrary.org/obo/NCBITaxon_9606
59130	Linear peptide	SLGEQQYSV	AGCCTGGGCGAGCAGCAGTACAGCGTG	CAGGAGGGCTCGGCAagcctgggcgagcagcagtacagcgtgGGATGCGGAGGGTCCGGCGGCCGCTCATCTCGTGCGACATCAAGCTATACTCTAATAT	187	195	Wilms tumor protein	http://www.ncbi.nlm.nih.gov/protein/P19544.2	Wilms tumor protein	http://www.uniprot.org/uniprot/P19544	Homo sapiens	http://purl.obolibrary.org/obo/NCBITaxon_9606	Homo sapiens	http://purl.obolibrary.org/obo/NCBITaxon_9606
59132	Linear peptide	SLGGLLTMV	AGCCTGGGCGGCCTGCTGACCATGGTG	CAGGAGGGCTCGGCAagcctgggcggcctgctgaccatggtgGGATGCGGAGGGTCCGGCGGCCGCTCATCTCGTGCGACATCAAGCTATACTCTAATAT	307	315	Latent membrane protein 2	http://www.ncbi.nlm.nih.gov/protein/ADK56631.1	Latent membrane protein 2	http://www.uniprot.org/uniprot/P13285	Human gammaherpesvirus 4	http://purl.obolibrary.org/obo/NCBITaxon_10376	Human gammaherpesvirus 4	http://purl.obolibrary.org/obo/NCBITaxon_10376	The sequence of this epitope was obtained from a clinical isolate and is not available in GenBank or SwissProt.
59141	Linear peptide	SLGLVILLVL	AGCCTGGGCCTGGTGATCCTGCTGGTGCTG	CAGGAGGGCTCGGCAagcctgggcctggtgatcctgctggtgctgGGATGCGGAGGGTCCGGCGGCCGCTCATCTCGTGCGACATCAAGCTATACTCTAA	365	374	Circumsporozoite protein, putative	http://www.ncbi.nlm.nih.gov/protein/P08677.2	Circumsporozoite protein, putative	http://www.uniprot.org/uniprot/A5KB63	Plasmodium vivax strain Belem	http://purl.obolibrary.org/obo/NCBITaxon_31273	Plasmodium vivax	http://purl.obolibrary.org/obo/NCBITaxon_5855
59154	Linear peptide	SLHTGFLASL	AGCCTGCACACCGGCTTCCTGGCCAGCCTG	CAGGAGGGCTCGGCAagcctgcacaccggcttcctggccagcctgGGATGCGGAGGGTCCGGCGGCCGCTCATCTCGTGCGACATCAAGCTATACTCTAA	432	441	Genome polyprotein	http://www.ncbi.nlm.nih.gov/protein/AAP55688.1	Genome polyprotein	http://www.uniprot.org/uniprot/P27958	Hepatitis C virus subtype 2a	http://purl.obolibrary.org/obo/NCBITaxon_31649	Hepatitis C virus	http://purl.obolibrary.org/obo/NCBITaxon_11103
59170	Linear peptide	SLIGHLQTL	AGCCTGATCGGCCACCTGCAGACCCTG	CAGGAGGGCTCGGCAagcctgatcggccacctgcagaccctgGGATGCGGAGGGTCCGGCGGCCGCTCATCTCGTGCGACATCAAGCTATACTCTAATAT	337	345	Dual specificity protein phosphatase 5	http://www.ncbi.nlm.nih.gov/protein/AAB06261.1	Dual specificity protein phosphatase 5	http://www.uniprot.org/uniprot/Q16690	Homo sapiens	http://purl.obolibrary.org/obo/NCBITaxon_9606	Homo sapiens	http://purl.obolibrary.org/obo/NCBITaxon_9606
59219	Linear peptide	SLKKNSRSL	AGCCTGAAGAAGAACAGCAGGAGCCTG	CAGGAGGGCTCGGCAagcctgaagaagaacagcaggagcctgGGATGCGGAGGGTCCGGCGGCCGCTCATCTCGTGCGACATCAAGCTATACTCTAATAT	64	72	Circumsporozoite (CS) protein	http://www.ncbi.nlm.nih.gov/protein/P02893.1	Circumsporozoite (CS) protein	http://www.uniprot.org/uniprot/Q7K740	Plasmodium falciparum 7G8	http://purl.obolibrary.org/obo/NCBITaxon_57266	Plasmodium falciparum	http://purl.obolibrary.org/obo/NCBITaxon_5833	Data originally imported from the HLA Ligand Database and recurated.
59240	Linear peptide	SLLAPGAKQNV	AGCCTGCTGGCCCCCGGCGCCAAGCAGAACGTG	CAGGAGGGCTCGGCAagcctgctggcccccggcgccaagcagaacgtgGGATGCGGAGGGTCCGGCGGCCGCTCATCTCGTGCGACATCAAGCTATACTC	401	411	Genome polyprotein	http://www.ncbi.nlm.nih.gov/protein/P26664.3	Genome polyprotein	http://www.uniprot.org/uniprot/P27958	Hepatitis C virus (isolate 1)	http://purl.obolibrary.org/obo/NCBITaxon_11104	Hepatitis C virus	http://purl.obolibrary.org/obo/NCBITaxon_11103	The following refers to the epitope id as found in the original FIMM database: P000058
59255	Linear peptide	SLLGGDVVSV	AGCCTGCTGGGCGGCGACGTGGTGAGCGTG	CAGGAGGGCTCGGCAagcctgctgggcggcgacgtggtgagcgtgGGATGCGGAGGGTCCGGCGGCCGCTCATCTCGTGCGACATCAAGCTATACTCTAA	27	36	TSC22 domain family protein 3	http://www.ncbi.nlm.nih.gov/protein/Q99576.2	TSC22 domain family protein 3	http://www.uniprot.org/uniprot/Q99576	Homo sapiens	http://purl.obolibrary.org/obo/NCBITaxon_9606	Homo sapiens	http://purl.obolibrary.org/obo/NCBITaxon_9606
59278	Linear peptide	SLLMWITQC	AGCCTGCTGATGTGGATCACCCAGTGC	CAGGAGGGCTCGGCAagcctgctgatgtggatcacccagtgcGGATGCGGAGGGTCCGGCGGCCGCTCATCTCGTGCGACATCAAGCTATACTCTAATAT	157	165	Cancer/testis antigen 1	http://www.ncbi.nlm.nih.gov/protein/P78358.1	Cancer/testis antigen 1	http://www.uniprot.org/uniprot/P78358	Homo sapiens	http://purl.obolibrary.org/obo/NCBITaxon_9606	Homo sapiens	http://purl.obolibrary.org/obo/NCBITaxon_9606
59283	Linear peptide	SLLMWITQV	AGCCTGCTGATGTGGATCACCCAGGTG	CAGGAGGGCTCGGCAagcctgctgatgtggatcacccaggtgGGATGCGGAGGGTCCGGCGGCCGCTCATCTCGTGCGACATCAAGCTATACTCTAATAT	157	165	Cancer/testis antigen 1	http://www.ncbi.nlm.nih.gov/protein/P78358.1	Cancer/testis antigen 1	http://www.uniprot.org/uniprot/P78358	Homo sapiens	http://purl.obolibrary.org/obo/NCBITaxon_9606	Homo sapiens	http://purl.obolibrary.org/obo/NCBITaxon_9606		analog
59292	Linear peptide	SLLPAIVEL	AGCCTGCTGCCCGCCATCGTGGAGCTG	CAGGAGGGCTCGGCAagcctgctgcccgccatcgtggagctgGGATGCGGAGGGTCCGGCGGCCGCTCATCTCGTGCGACATCAAGCTATACTCTAATAT	403	411	Serine/threonine-protein phosphatase 2A 65 kDa regulatory subunit A alpha isoform	http://www.ncbi.nlm.nih.gov/protein/P30153.4	Serine/threonine-protein phosphatase 2A 65 kDa regulatory subunit A alpha isoform	http://www.uniprot.org/uniprot/P30153	Homo sapiens	http://purl.obolibrary.org/obo/NCBITaxon_9606	Homo sapiens	http://purl.obolibrary.org/obo/NCBITaxon_9606
59295	Linear peptide	SLLPPDALVGL	AGCCTGCTGCCCCCCGACGCCCTGGTGGGCCTG	CAGGAGGGCTCGGCAagcctgctgccccccgacgccctggtgggcctgGGATGCGGAGGGTCCGGCGGCCGCTCATCTCGTGCGACATCAAGCTATACTC	156	166	Protein transport protein Sec23B	http://www.ncbi.nlm.nih.gov/protein/AAH05404.1	Protein transport protein Sec23B	http://www.uniprot.org/uniprot/Q15437	Homo sapiens	http://purl.obolibrary.org/obo/NCBITaxon_9606	Homo sapiens	http://purl.obolibrary.org/obo/NCBITaxon_9606
59296	Linear peptide	SLLPPTALVGL	AGCCTGCTGCCCCCCACCGCCCTGGTGGGCCTG	CAGGAGGGCTCGGCAagcctgctgccccccaccgccctggtgggcctgGGATGCGGAGGGTCCGGCGGCCGCTCATCTCGTGCGACATCAAGCTATACTC	156	166	Protein transport protein Sec23A	http://www.ncbi.nlm.nih.gov/protein/3EG9_A	Protein transport protein Sec23A	http://www.uniprot.org/uniprot/Q15436	Homo sapiens	http://purl.obolibrary.org/obo/NCBITaxon_9606	Homo sapiens	http://purl.obolibrary.org/obo/NCBITaxon_9606
59336	Linear peptide	SLMAFTAAV	AGCCTGATGGCCTTCACCGCCGCCGTG	CAGGAGGGCTCGGCAagcctgatggccttcaccgccgccgtgGGATGCGGAGGGTCCGGCGGCCGCTCATCTCGTGCGACATCAAGCTATACTCTAATAT	1789	1797	Genome polyprotein	http://www.ncbi.nlm.nih.gov/protein/BAA01582.1	Genome polyprotein	http://www.uniprot.org/uniprot/P27958	Hepatitis C virus subtype 1a	http://purl.obolibrary.org/obo/NCBITaxon_31646	Hepatitis C virus	http://purl.obolibrary.org/obo/NCBITaxon_11103	Imported from the TopBank database.
59366	Linear peptide	SLNQTVHSL	AGCCTGAACCAGACCGTGCACAGCCTG	CAGGAGGGCTCGGCAagcctgaaccagaccgtgcacagcctgGGATGCGGAGGGTCCGGCGGCCGCTCATCTCGTGCGACATCAAGCTATACTCTAATAT	69	77	Nucleoprotein	http://www.ncbi.nlm.nih.gov/protein/P09992.1	Nucleoprotein	http://www.uniprot.org/uniprot/P09992	Lymphocytic choriomeningitis virus (strain Armstrong) (clone 53b)	https://ontology.iedb.org/ontology/ONTIE_0000397	Lymphocytic choriomeningitis mammarenavirus	http://purl.obolibrary.org/obo/NCBITaxon_11623
59388	Linear peptide	SLPITVYYA	AGCCTGCCCATCACCGTGTACTACGCC	CAGGAGGGCTCGGCAagcctgcccatcaccgtgtactacgccGGATGCGGAGGGTCCGGCGGCCGCTCATCTCGTGCGACATCAAGCTATACTCTAATAT	77	85	Envelope glycoprotein D	http://www.ncbi.nlm.nih.gov/protein/Q69091.1	Envelope glycoprotein D	http://www.uniprot.org/uniprot/Q69091	Herpes simplex virus (type 1 / strain 17)	http://purl.obolibrary.org/obo/NCBITaxon_10299	Human alphaherpesvirus 1	http://purl.obolibrary.org/obo/NCBITaxon_10298
59411	Linear peptide	SLQEEIAFL	AGCCTGCAGGAGGAGATCGCCTTCCTG	CAGGAGGGCTCGGCAagcctgcaggaggagatcgccttcctgGGATGCGGAGGGTCCGGCGGCCGCTCATCTCGTGCGACATCAAGCTATACTCTAATAT	226	234	Vimentin	http://www.ncbi.nlm.nih.gov/protein/ACA06103.1	Vimentin	http://www.uniprot.org/uniprot/P08670	Homo sapiens	http://purl.obolibrary.org/obo/NCBITaxon_9606	Homo sapiens	http://purl.obolibrary.org/obo/NCBITaxon_9606
59418	Linear peptide	SLQNSEFLL	AGCCTGCAGAACAGCGAGTTCCTGCTG	CAGGAGGGCTCGGCAagcctgcagaacagcgagttcctgctgGGATGCGGAGGGTCCGGCGGCCGCTCATCTCGTGCGACATCAAGCTATACTCTAATAT	558	566	Human polyomavirus 1 protein	http://www.ncbi.nlm.nih.gov/protein/AAT47414.1			Human polyomavirus 1	http://purl.obolibrary.org/obo/NCBITaxon_1891762	Human polyomavirus 1	http://purl.obolibrary.org/obo/NCBITaxon_1891762
59449	Linear peptide	SLSAYIIRV	AGCCTGAGCGCCTACATCATCAGGGTG	CAGGAGGGCTCGGCAagcctgagcgcctacatcatcagggtgGGATGCGGAGGGTCCGGCGGCCGCTCATCTCGTGCGACATCAAGCTATACTCTAATAT	184	192	Envelope protein H3	http://www.ncbi.nlm.nih.gov/protein/P20497.1	Envelope protein H3	http://www.uniprot.org/uniprot/P07240	Vaccinia virus Copenhagen	http://purl.obolibrary.org/obo/NCBITaxon_10249	Vaccinia virus	http://purl.obolibrary.org/obo/NCBITaxon_10245
59453	Linear peptide	SLSEKTVLL	AGCCTGAGCGAGAAGACCGTGCTGCTG	CAGGAGGGCTCGGCAagcctgagcgagaagaccgtgctgctgGGATGCGGAGGGTCCGGCGGCCGCTCATCTCGTGCGACATCAAGCTATACTCTAATAT	106	114	CD59 glycoprotein	http://www.ncbi.nlm.nih.gov/protein/P13987.1	CD59 glycoprotein	http://www.uniprot.org/uniprot/P13987	Homo sapiens	http://purl.obolibrary.org/obo/NCBITaxon_9606	Homo sapiens	http://purl.obolibrary.org/obo/NCBITaxon_9606
59459	Linear peptide	SLSHYFTLV	AGCCTGAGCCACTACTTCACCCTGGTG	CAGGAGGGCTCGGCAagcctgagccactacttcaccctggtgGGATGCGGAGGGTCCGGCGGCCGCTCATCTCGTGCGACATCAAGCTATACTCTAATAT			Other Trypanosoma cruzi protein	https://ontology.iedb.org/ontology/ONTIE_0002050			Trypanosoma cruzi	http://purl.obolibrary.org/obo/NCBITaxon_5693	Trypanosoma cruzi	http://purl.obolibrary.org/obo/NCBITaxon_5693
59464	Linear peptide	SLSNLDFRL	AGCCTGAGCAACCTGGACTTCAGGCTG	CAGGAGGGCTCGGCAagcctgagcaacctggacttcaggctgGGATGCGGAGGGTCCGGCGGCCGCTCATCTCGTGCGACATCAAGCTATACTCTAATAT	340	348	Protein F11	http://www.ncbi.nlm.nih.gov/protein/AAO89329.1	Protein F11	http://www.uniprot.org/uniprot/Q80HX7	Vaccinia virus WR	http://purl.obolibrary.org/obo/NCBITaxon_10254	Vaccinia virus	http://purl.obolibrary.org/obo/NCBITaxon_10245
59472	Linear peptide	SLSRFSWGA	AGCCTGAGCAGGTTCAGCTGGGGCGCC	CAGGAGGGCTCGGCAagcctgagcaggttcagctggggcgccGGATGCGGAGGGTCCGGCGGCCGCTCATCTCGTGCGACATCAAGCTATACTCTAATAT	111	119	Myelin basic protein (UniProt:P02686)	http://www.ncbi.nlm.nih.gov/protein/AAA59562.1	Myelin basic protein	http://www.uniprot.org/uniprot/P02686	Homo sapiens	http://purl.obolibrary.org/obo/NCBITaxon_9606	Homo sapiens	http://purl.obolibrary.org/obo/NCBITaxon_9606
59524	Linear peptide	SLTSINVQA	AGCCTGACCAGCATCAACGTGCAGGCC	CAGGAGGGCTCGGCAagcctgaccagcatcaacgtgcaggccGGATGCGGAGGGTCCGGCGGCCGCTCATCTCGTGCGACATCAAGCTATACTCTAATAT	68	76	Genome polyprotein	http://www.ncbi.nlm.nih.gov/protein/YP_001527886.1	Genome polyprotein	http://www.uniprot.org/uniprot/P14335	West Nile virus NY-99	https://ontology.iedb.org/ontology/ONTIE_0000839	West Nile virus	http://purl.obolibrary.org/obo/NCBITaxon_11082	The author provided GenBank identifier was GI:11597240.
59551	Linear peptide	SLVIVTTFV	AGCCTGGTGATCGTGACCACCTTCGTG	CAGGAGGGCTCGGCAagcctggtgatcgtgaccaccttcgtgGGATGCGGAGGGTCCGGCGGCCGCTCATCTCGTGCGACATCAAGCTATACTCTAATAT	225	233	Envelope glycoprotein H	http://www.ncbi.nlm.nih.gov/protein/P03231.1	Envelope glycoprotein H	http://www.uniprot.org/uniprot/P03231	Human gammaherpesvirus 4	http://purl.obolibrary.org/obo/NCBITaxon_10376	Human gammaherpesvirus 4	http://purl.obolibrary.org/obo/NCBITaxon_10376
59561	Linear peptide	SLVNGVVRL	AGCCTGGTGAACGGCGTGGTGAGGCTG	CAGGAGGGCTCGGCAagcctggtgaacggcgtggtgaggctgGGATGCGGAGGGTCCGGCGGCCGCTCATCTCGTGCGACATCAAGCTATACTCTAATAT	2846	2854	Genome polyprotein	http://www.ncbi.nlm.nih.gov/protein/NP_041724.2	Genome polyprotein	http://www.uniprot.org/uniprot/P14335	West Nile virus	http://purl.obolibrary.org/obo/NCBITaxon_11082	West Nile virus	http://purl.obolibrary.org/obo/NCBITaxon_11082
59582	Linear peptide	SLWGQPAEA	AGCCTGTGGGGCCAGCCCGCCGAGGCC	CAGGAGGGCTCGGCAagcctgtggggccagcccgccgaggccGGATGCGGAGGGTCCGGCGGCCGCTCATCTCGTGCGACATCAAGCTATACTCTAATAT	18	26	Collagen alpha-5(IV) chain	http://www.ncbi.nlm.nih.gov/protein/AIW39922.1	Collagen alpha-5(IV) chain	http://www.uniprot.org/uniprot/P29400	Homo sapiens	http://purl.obolibrary.org/obo/NCBITaxon_9606	Homo sapiens	http://purl.obolibrary.org/obo/NCBITaxon_9606
59594	Linear peptide	SLYFGGICV	AGCCTGTACTTCGGCGGCATCTGCGTG	CAGGAGGGCTCGGCAagcctgtacttcggcggcatctgcgtgGGATGCGGAGGGTCCGGCGGCCGCTCATCTCGTGCGACATCAAGCTATACTCTAATAT			Phosphate transport system permease protein PstA 1 (UniProt:O86345)	https://ontology.iedb.org/ontology/ONTIE_0002794	Phosphate transport system permease protein PstA 1	http://www.uniprot.org/uniprot/O86345	Mycobacterium tuberculosis	http://purl.obolibrary.org/obo/NCBITaxon_1773	Mycobacterium tuberculosis	http://purl.obolibrary.org/obo/NCBITaxon_1773
59612	Linear peptide	SLYNTIAVL	AGCCTGTACAACACCATCGCCGTGCTG	CAGGAGGGCTCGGCAagcctgtacaacaccatcgccgtgctgGGATGCGGAGGGTCCGGCGGCCGCTCATCTCGTGCGACATCAAGCTATACTCTAATAT	77	85	Gag polyprotein	http://www.ncbi.nlm.nih.gov/protein/ABI20203.1	Gag polyprotein	http://www.uniprot.org/uniprot/P04591	Human immunodeficiency virus 1	http://purl.obolibrary.org/obo/NCBITaxon_11676	Human immunodeficiency virus 1	http://purl.obolibrary.org/obo/NCBITaxon_11676
59613	Linear peptide	SLYNTVATL	AGCCTGTACAACACCGTGGCCACCCTG	CAGGAGGGCTCGGCAagcctgtacaacaccgtggccaccctgGGATGCGGAGGGTCCGGCGGCCGCTCATCTCGTGCGACATCAAGCTATACTCTAATAT	38	46	Gag polyprotein	http://www.ncbi.nlm.nih.gov/protein/Q9INE0	Gag polyprotein	http://www.uniprot.org/uniprot/P04591	HIV-1 M:B	http://purl.obolibrary.org/obo/NCBITaxon_505185	Human immunodeficiency virus 1	http://purl.obolibrary.org/obo/NCBITaxon_11676
59627	Linear peptide	SMAGSSAMI	AGCATGGCCGGCAGCAGCGCCATGATC	CAGGAGGGCTCGGCAagcatggccggcagcagcgccatgatcGGATGCGGAGGGTCCGGCGGCCGCTCATCTCGTGCGACATCAAGCTATACTCTAATAT	166	174	Diacylglycerol acyltransferase/mycolyltransferase Ag85B	http://www.ncbi.nlm.nih.gov/protein/P31952	Diacylglycerol acyltransferase/mycolyltransferase Ag85B	http://www.uniprot.org/uniprot/P9WQP1	Mycobacterium tuberculosis	http://purl.obolibrary.org/obo/NCBITaxon_1773	Mycobacterium tuberculosis	http://purl.obolibrary.org/obo/NCBITaxon_1773
59667	Linear peptide	SMHFYGWSL	AGCATGCACTTCTACGGCTGGAGCCTG	CAGGAGGGCTCGGCAagcatgcacttctacggctggagcctgGGATGCGGAGGGTCCGGCGGCCGCTCATCTCGTGCGACATCAAGCTATACTCTAATAT	720	728	Ribonucleoside-diphosphate reductase large subunit	http://www.ncbi.nlm.nih.gov/protein/P12848.1	Ribonucleoside-diphosphate reductase large subunit	http://www.uniprot.org/uniprot/P12848	Vaccinia virus	http://purl.obolibrary.org/obo/NCBITaxon_10245	Vaccinia virus	http://purl.obolibrary.org/obo/NCBITaxon_10245
59722	Linear peptide	SMNATLVQA	AGCATGAACGCCACCCTGGTGCAGGCC	CAGGAGGGCTCGGCAagcatgaacgccaccctggtgcaggccGGATGCGGAGGGTCCGGCGGCCGCTCATCTCGTGCGACATCAAGCTATACTCTAATAT	47	55	Trans-sialidase, putative (UniProt:K4DPA8)	http://www.ncbi.nlm.nih.gov/protein/JH0823	Trans-sialidase, putative	http://www.uniprot.org/uniprot/K4DPA8	Trypanosoma cruzi	http://purl.obolibrary.org/obo/NCBITaxon_5693	Trypanosoma cruzi	http://purl.obolibrary.org/obo/NCBITaxon_5693
59766	Linear peptide	SMVGNWAKV	AGCATGGTGGGCAACTGGGCCAAGGTG	CAGGAGGGCTCGGCAagcatggtgggcaactgggccaaggtgGGATGCGGAGGGTCCGGCGGCCGCTCATCTCGTGCGACATCAAGCTATACTCTAATAT	363	371	Genome polyprotein	http://www.ncbi.nlm.nih.gov/protein/AAA45676.1	Genome polyprotein	http://www.uniprot.org/uniprot/P27958	Hepatitis C virus (isolate H)	http://purl.obolibrary.org/obo/NCBITaxon_11108	Hepatitis C virus	http://purl.obolibrary.org/obo/NCBITaxon_11103	The following refers to the epitope id as found in the original FIMM database: P000054
59767	Linear peptide	SMVGNWAKVL	AGCATGGTGGGCAACTGGGCCAAGGTGCTG	CAGGAGGGCTCGGCAagcatggtgggcaactgggccaaggtgctgGGATGCGGAGGGTCCGGCGGCCGCTCATCTCGTGCGACATCAAGCTATACTCTAA	363	372	Genome polyprotein	http://www.ncbi.nlm.nih.gov/protein/BAB18806.1	Genome polyprotein	http://www.uniprot.org/uniprot/P27958	Hepatitis C virus subtype 1a	http://purl.obolibrary.org/obo/NCBITaxon_31646	Hepatitis C virus	http://purl.obolibrary.org/obo/NCBITaxon_11103
60867	Linear peptide	SRYWAIRTR	AGCAGGTACTGGGCCATCAGGACCAGG	CAGGAGGGCTCGGCAagcaggtactgggccatcaggaccaggGGATGCGGAGGGTCCGGCGGCCGCTCATCTCGTGCGACATCAAGCTATACTCTAATAT	383	391	Nucleoprotein	https://ontology.iedb.org/ontology/ONTIE_0002033	Nucleoprotein	http://www.uniprot.org/uniprot/P03466	Influenza A virus (A/Puerto Rico/8/1934(H1N1))	http://purl.obolibrary.org/obo/NCBITaxon_211044	Influenza A virus	http://purl.obolibrary.org/obo/NCBITaxon_11320
61741	Linear peptide	STLPETTVV	AGCACCCTGCCCGAGACCACCGTGGTG	CAGGAGGGCTCGGCAagcaccctgcccgagaccaccgtggtgGGATGCGGAGGGTCCGGCGGCCGCTCATCTCGTGCGACATCAAGCTATACTCTAATAT	141	149	Capsid protein	http://www.ncbi.nlm.nih.gov/protein/Q9QAC5	Capsid protein	http://www.uniprot.org/uniprot/Q76R61	Hepatitis B virus	http://purl.obolibrary.org/obo/NCBITaxon_10407	Hepatitis B virus	http://purl.obolibrary.org/obo/NCBITaxon_10407
62127	Linear peptide	SVFRENLFL	AGCGTGTTCAGGGAGAACCTGTTCCTG	CAGGAGGGCTCGGCAagcgtgttcagggagaacctgttcctgGGATGCGGAGGGTCCGGCGGCCGCTCATCTCGTGCGACATCAAGCTATACTCTAATAT	60	68	Cysteine peptidase, putative,cysteine peptidase, clan CA, family C1, cathepsin L-like, putative (UniProt:K4DPT9)	http://www.ncbi.nlm.nih.gov/protein/A45629	Cysteine peptidase, putative,cysteine peptidase, clan CA, family C1, cathepsin L-like, putative	http://www.uniprot.org/uniprot/K4DPT9	Trypanosoma cruzi	http://purl.obolibrary.org/obo/NCBITaxon_5693	Trypanosoma cruzi	http://purl.obolibrary.org/obo/NCBITaxon_5693
62139	Linear peptide	SVGGVFTSV	AGCGTGGGCGGCGTGTTCACCAGCGTG	CAGGAGGGCTCGGCAagcgtgggcggcgtgttcaccagcgtgGGATGCGGAGGGTCCGGCGGCCGCTCATCTCGTGCGACATCAAGCTATACTCTAATAT	254	262	CMP-sialic acid transporter		CMP-sialic acid transporter	http://www.uniprot.org/uniprot/P78382	Homo sapiens	http://purl.obolibrary.org/obo/NCBITaxon_9606	Homo sapiens	http://purl.obolibrary.org/obo/NCBITaxon_9606		neo-epitope
62244	Linear peptide	SVMKRRIEEIC	AGCGTGATGAAGAGGAGGATCGAGGAGATCTGC	CAGGAGGGCTCGGCAagcgtgatgaagaggaggatcgaggagatctgcGGATGCGGAGGGTCCGGCGGCCGCTCATCTCGTGCGACATCAAGCTATACTC	337	347	55 kDa immediate-early protein 1	http://www.ncbi.nlm.nih.gov/protein/AAR31448.1	55 kDa immediate-early protein 1	http://www.uniprot.org/uniprot/F5HCM1	Human betaherpesvirus 5	http://purl.obolibrary.org/obo/NCBITaxon_10359	Human betaherpesvirus 5	http://purl.obolibrary.org/obo/NCBITaxon_10359
62305	Linear peptide	SVRDRLARL	AGCGTGAGGGACAGGCTGGCCAGGCTG	CAGGAGGGCTCGGCAagcgtgagggacaggctggccaggctgGGATGCGGAGGGTCCGGCGGCCGCTCATCTCGTGCGACATCAAGCTATACTCTAATAT	596	604	Epstein-Barr nuclear antigen 3	http://www.ncbi.nlm.nih.gov/protein/AFY97830.1	Epstein-Barr nuclear antigen 3	http://www.uniprot.org/uniprot/P12977	Human gammaherpesvirus 4	http://purl.obolibrary.org/obo/NCBITaxon_10376	Human gammaherpesvirus 4	http://purl.obolibrary.org/obo/NCBITaxon_10376
62404	Linear peptide	SVYDFFVWL	AGCGTGTACGACTTCTTCGTGTGGCTG	CAGGAGGGCTCGGCAagcgtgtacgacttcttcgtgtggctgGGATGCGGAGGGTCCGGCGGCCGCTCATCTCGTGCGACATCAAGCTATACTCTAATAT	180	188	Other Homo sapiens (human) protein	http://www.ncbi.nlm.nih.gov/protein/CAA04137.1	L-dopachrome tautomerase	http://www.uniprot.org/uniprot/P40126	Homo sapiens	http://purl.obolibrary.org/obo/NCBITaxon_9606	Homo sapiens	http://purl.obolibrary.org/obo/NCBITaxon_9606
62977	Linear peptide	TARHTPVNSW	ACCGCCAGGCACACCCCCGTGAACAGCTGG	CAGGAGGGCTCGGCAaccgccaggcacacccccgtgaacagctggGGATGCGGAGGGTCCGGCGGCCGCTCATCTCGTGCGACATCAAGCTATACTCTAA	2819	2828	Genome polyprotein	http://www.ncbi.nlm.nih.gov/protein/P26664.3	Genome polyprotein	http://www.uniprot.org/uniprot/P27958	Hepatitis C virus	http://purl.obolibrary.org/obo/NCBITaxon_11103	Hepatitis C virus	http://purl.obolibrary.org/obo/NCBITaxon_11103
63963	Linear peptide	TGSPITYSTY	ACCGGCAGCCCCATCACCTACAGCACCTAC	CAGGAGGGCTCGGCAaccggcagccccatcacctacagcacctacGGATGCGGAGGGTCCGGCGGCCGCTCATCTCGTGCGACATCAAGCTATACTCTAA	1287	1296	Genome polyprotein	http://www.ncbi.nlm.nih.gov/protein/AAA45676.1	Genome polyprotein	http://www.uniprot.org/uniprot/P27958	Hepatitis C virus	http://purl.obolibrary.org/obo/NCBITaxon_11103	Hepatitis C virus	http://purl.obolibrary.org/obo/NCBITaxon_11103
64320	Linear peptide	TIHDIILECV	ACCATCCACGACATCATCCTGGAGTGCGTG	CAGGAGGGCTCGGCAaccatccacgacatcatcctggagtgcgtgGGATGCGGAGGGTCCGGCGGCCGCTCATCTCGTGCGACATCAAGCTATACTCTAA	29	38	Protein E6	http://www.ncbi.nlm.nih.gov/protein/P03126.1	Protein E6	http://www.uniprot.org/uniprot/P03126	Human papillomavirus type 16	http://purl.obolibrary.org/obo/NCBITaxon_333760	Alphapapillomavirus 9	http://purl.obolibrary.org/obo/NCBITaxon_337041
64412	Linear peptide	TIPEALAAV	ACCATCCCCGAGGCCCTGGCCGCCGTG	CAGGAGGGCTCGGCAaccatccccgaggccctggccgccgtgGGATGCGGAGGGTCCGGCGGCCGCTCATCTCGTGCGACATCAAGCTATACTCTAATAT	6	14	Uncharacterized PE-PGRS family protein PE_PGRS33	http://www.ncbi.nlm.nih.gov/protein/AAU10330.1	Uncharacterized PE-PGRS family protein PE_PGRS33	http://www.uniprot.org/uniprot/P9WIF5	Mycobacterium tuberculosis	http://purl.obolibrary.org/obo/NCBITaxon_1773	Mycobacterium tuberculosis	http://purl.obolibrary.org/obo/NCBITaxon_1773
64708	Linear peptide	TLACFAVYT	ACCCTGGCCTGCTTCGCCGTGTACACC	CAGGAGGGCTCGGCAaccctggcctgcttcgccgtgtacaccGGATGCGGAGGGTCCGGCGGCCGCTCATCTCGTGCGACATCAAGCTATACTCTAATAT	157	165	Human polyomavirus 1 protein	http://www.ncbi.nlm.nih.gov/protein/AAT47414.1			Human polyomavirus 1	http://purl.obolibrary.org/obo/NCBITaxon_1891762	Human polyomavirus 1	http://purl.obolibrary.org/obo/NCBITaxon_1891762
64710	Linear peptide	TLACFVLAAV	ACCCTGGCCTGCTTCGTGCTGGCCGCCGTG	CAGGAGGGCTCGGCAaccctggcctgcttcgtgctggccgccgtgGGATGCGGAGGGTCCGGCGGCCGCTCATCTCGTGCGACATCAAGCTATACTCTAA	60	69	Membrane protein	http://www.ncbi.nlm.nih.gov/protein/Q692E0	Membrane protein	http://www.uniprot.org/uniprot/P59596	SARS coronavirus TJF	http://purl.obolibrary.org/obo/NCBITaxon_284672	SARS-related coronavirus	http://purl.obolibrary.org/obo/NCBITaxon_694009
64714	Linear peptide	TLAGKGISVV	ACCCTGGCCGGCAAGGGCATCAGCGTGGTG	CAGGAGGGCTCGGCAaccctggccggcaagggcatcagcgtggtgGGATGCGGAGGGTCCGGCGGCCGCTCATCTCGTGCGACATCAAGCTATACTCTAA	86	95	MPT51/MPB51 antigen	http://www.ncbi.nlm.nih.gov/protein/P0A4V6.1	MPT51/MPB51 antigen	http://www.uniprot.org/uniprot/P9WQN7	Mycobacterium tuberculosis	http://purl.obolibrary.org/obo/NCBITaxon_1773	Mycobacterium tuberculosis	http://purl.obolibrary.org/obo/NCBITaxon_1773
64727	Linear peptide	TLARGFPFV	ACCCTGGCCAGGGGCTTCCCCTTCGTG	CAGGAGGGCTCGGCAaccctggccaggggcttccccttcgtgGGATGCGGAGGGTCCGGCGGCCGCTCATCTCGTGCGACATCAAGCTATACTCTAATAT	2351	2359	Genome polyprotein	http://www.ncbi.nlm.nih.gov/protein/NP_041724.2	Genome polyprotein	http://www.uniprot.org/uniprot/P14335	West Nile virus	http://purl.obolibrary.org/obo/NCBITaxon_11082	West Nile virus	http://purl.obolibrary.org/obo/NCBITaxon_11082
64758	Linear peptide	TLDSQVMSL	ACCCTGGACAGCCAGGTGATGAGCCTG	CAGGAGGGCTCGGCAaccctggacagccaggtgatgagcctgGGATGCGGAGGGTCCGGCGGCCGCTCATCTCGTGCGACATCAAGCTATACTCTAATAT	360	368	L-dopachrome tautomerase	http://www.ncbi.nlm.nih.gov/protein/NP_001913.2	L-dopachrome tautomerase	http://www.uniprot.org/uniprot/P40126	Homo sapiens	http://purl.obolibrary.org/obo/NCBITaxon_9606	Homo sapiens	http://purl.obolibrary.org/obo/NCBITaxon_9606
64763	Linear peptide	TLDYKPLSV	ACCCTGGACTACAAGCCCCTGAGCGTG	CAGGAGGGCTCGGCAaccctggactacaagcccctgagcgtgGGATGCGGAGGGTCCGGCGGCCGCTCATCTCGTGCGACATCAAGCTATACTCTAATAT	208	216	DNA polymerase processivity factor BMRF1	http://www.ncbi.nlm.nih.gov/protein/AHA36351.1	DNA polymerase processivity factor BMRF1	http://www.uniprot.org/uniprot/P03191	Human gammaherpesvirus 4	http://purl.obolibrary.org/obo/NCBITaxon_10376	Human gammaherpesvirus 4	http://purl.obolibrary.org/obo/NCBITaxon_10376
64769	Linear peptide	TLEEFSAKL	ACCCTGGAGGAGTTCAGCGCCAAGCTG	CAGGAGGGCTCGGCAaccctggaggagttcagcgccaagctgGGATGCGGAGGGTCCGGCGGCCGCTCATCTCGTGCGACATCAAGCTATACTCTAATAT	4	12	Other Trypanosoma cruzi protein	http://www.ncbi.nlm.nih.gov/protein/Q9U6Z1.2			Trypanosoma cruzi	http://purl.obolibrary.org/obo/NCBITaxon_5693	Trypanosoma cruzi	http://purl.obolibrary.org/obo/NCBITaxon_5693
64772	Linear peptide	TLEGFASPL	ACCCTGGAGGGCTTCGCCAGCCCCCTG	CAGGAGGGCTCGGCAaccctggagggcttcgccagccccctgGGATGCGGAGGGTCCGGCGGCCGCTCATCTCGTGCGACATCAAGCTATACTCTAATAT	343	351	Tyrosinase	http://www.ncbi.nlm.nih.gov/protein/AAK00805.1	Tyrosinase	http://www.uniprot.org/uniprot/P14679	Homo sapiens	http://purl.obolibrary.org/obo/NCBITaxon_9606	Homo sapiens	http://purl.obolibrary.org/obo/NCBITaxon_9606
64794	Linear peptide	TLFIGSHVV	ACCCTGTTCATCGGCAGCCACGTGGTG	CAGGAGGGCTCGGCAaccctgttcatcggcagccacgtggtgGGATGCGGAGGGTCCGGCGGCCGCTCATCTCGTGCGACATCAAGCTATACTCTAATAT	420	428	Envelope glycoprotein H	http://www.ncbi.nlm.nih.gov/protein/P03231.1	Envelope glycoprotein H	http://www.uniprot.org/uniprot/P03231	Human herpesvirus 4 strain B95-8	http://purl.obolibrary.org/obo/NCBITaxon_10377	Human gammaherpesvirus 4	http://purl.obolibrary.org/obo/NCBITaxon_10376
64800	Linear peptide	TLFPGDDDL	ACCCTGTTCCCCGGCGACGACGACCTG	CAGGAGGGCTCGGCAaccctgttccccggcgacgacgacctgGGATGCGGAGGGTCCGGCGGCCGCTCATCTCGTGCGACATCAAGCTATACTCTAATAT	4	12	Protein A27	http://www.ncbi.nlm.nih.gov/protein/AAB96472.1	Protein A27	http://www.uniprot.org/uniprot/P11258	Vaccinia virus	http://purl.obolibrary.org/obo/NCBITaxon_10245	Vaccinia virus	http://purl.obolibrary.org/obo/NCBITaxon_10245
64818	Linear peptide	TLGIVCPI	ACCCTGGGCATCGTGTGCCCCATC	CAGGAGGGCTCGGCAaccctgggcatcgtgtgccccatcGGATGCGGAGGGTCCGGCGGCCGCTCATCTCGTGCGACATCAAGCTATACTCTAATATAGC	86	93	Protein E7	http://www.ncbi.nlm.nih.gov/protein/ABL96585.1	Protein E7	http://www.uniprot.org/uniprot/P03129	Human papillomavirus type 16	http://purl.obolibrary.org/obo/NCBITaxon_333760	Alphapapillomavirus 9	http://purl.obolibrary.org/obo/NCBITaxon_337041
64819	Linear peptide	TLGIVCPIC	ACCCTGGGCATCGTGTGCCCCATCTGC	CAGGAGGGCTCGGCAaccctgggcatcgtgtgccccatctgcGGATGCGGAGGGTCCGGCGGCCGCTCATCTCGTGCGACATCAAGCTATACTCTAATAT	86	94	Protein E7	http://www.ncbi.nlm.nih.gov/protein/P03129.1	Protein E7	http://www.uniprot.org/uniprot/P03129	Human papillomavirus type 16	http://purl.obolibrary.org/obo/NCBITaxon_333760	Alphapapillomavirus 9	http://purl.obolibrary.org/obo/NCBITaxon_337041	Data originally imported from the HLA Ligand Database and re-curated by IEDB.
64821	Linear peptide	TLGQHLPTL	ACCCTGGGCCAGCACCTGCCCACCCTG	CAGGAGGGCTCGGCAaccctgggccagcacctgcccaccctgGGATGCGGAGGGTCCGGCGGCCGCTCATCTCGTGCGACATCAAGCTATACTCTAATAT	123	131	Protein Tax-1	http://www.ncbi.nlm.nih.gov/protein/P03409.2	Protein Tax-1	http://www.uniprot.org/uniprot/P14079	Human T-lymphotropic virus 1	http://purl.obolibrary.org/obo/NCBITaxon_11908	Primate T-lymphotropic virus 1	http://purl.obolibrary.org/obo/NCBITaxon_194440	The epitope sequence was cited in Yashiki et al. AIDS Res Hum Retroviruses. 2001 Jul 20;17(11):1047-61[PMID:11485622].
64830	Linear peptide	TLHEYMLDL	ACCCTGCACGAGTACATGCTGGACCTG	CAGGAGGGCTCGGCAaccctgcacgagtacatgctggacctgGGATGCGGAGGGTCCGGCGGCCGCTCATCTCGTGCGACATCAAGCTATACTCTAATAT	7	15	Protein E7	http://www.ncbi.nlm.nih.gov/protein/ABL96585.1	Protein E7	http://www.uniprot.org/uniprot/P03129	Human papillomavirus type 16	http://purl.obolibrary.org/obo/NCBITaxon_333760	Alphapapillomavirus 9	http://purl.obolibrary.org/obo/NCBITaxon_337041
64883	Linear peptide	TLKQRLTNL	ACCCTGAAGCAGAGGCTGACCAACCTG	CAGGAGGGCTCGGCAaccctgaagcagaggctgaccaacctgGGATGCGGAGGGTCCGGCGGCCGCTCATCTCGTGCGACATCAAGCTATACTCTAATAT	46	54	Protein A27	http://www.ncbi.nlm.nih.gov/protein/AAO89429.1	Protein A27	http://www.uniprot.org/uniprot/P11258	Vaccinia virus WR	http://purl.obolibrary.org/obo/NCBITaxon_10254	Vaccinia virus	http://purl.obolibrary.org/obo/NCBITaxon_10245
64893	Linear peptide	TLLANVTAV	ACCCTGCTGGCCAACGTGACCGCCGTG	CAGGAGGGCTCGGCAaccctgctggccaacgtgaccgccgtgGGATGCGGAGGGTCCGGCGGCCGCTCATCTCGTGCGACATCAAGCTATACTCTAATAT	341	349	Intermediate capsid protein VP6	http://www.ncbi.nlm.nih.gov/protein/P03530.1	Intermediate capsid protein VP6	http://www.uniprot.org/uniprot/A2T3T0	Human rotavirus strain WA	http://purl.obolibrary.org/obo/NCBITaxon_10962	Rotavirus A	http://purl.obolibrary.org/obo/NCBITaxon_28875
64942	Linear peptide	TLLVDLLWL	ACCCTGCTGGTGGACCTGCTGTGGCTG	CAGGAGGGCTCGGCAaccctgctggtggacctgctgtggctgGGATGCGGAGGGTCCGGCGGCCGCTCATCTCGTGCGACATCAAGCTATACTCTAATAT	166	174	Latent membrane protein 1	http://www.ncbi.nlm.nih.gov/protein/P03230.1	Latent membrane protein 1	http://www.uniprot.org/uniprot/P03230	Human gammaherpesvirus 4	http://purl.obolibrary.org/obo/NCBITaxon_10376	Human gammaherpesvirus 4	http://purl.obolibrary.org/obo/NCBITaxon_10376
64948	Linear peptide	TLLYATVEV	ACCCTGCTGTACGCCACCGTGGAGGTG	CAGGAGGGCTCGGCAaccctgctgtacgccaccgtggaggtgGGATGCGGAGGGTCCGGCGGCCGCTCATCTCGTGCGACATCAAGCTATACTCTAATAT	380	388	Trans-sialidase, putative (UniProt:K4DPA8)	http://www.ncbi.nlm.nih.gov/protein/JH0823	Trans-sialidase, putative	http://www.uniprot.org/uniprot/K4DPA8	Trypanosoma cruzi	http://purl.obolibrary.org/obo/NCBITaxon_5693	Trypanosoma cruzi	http://purl.obolibrary.org/obo/NCBITaxon_5693
64950	Linear peptide	TLLYVLFEV	ACCCTGCTGTACGTGCTGTTCGAGGTG	CAGGAGGGCTCGGCAaccctgctgtacgtgctgttcgaggtgGGATGCGGAGGGTCCGGCGGCCGCTCATCTCGTGCGACATCAAGCTATACTCTAATAT	914	922	Hexon protein	http://www.ncbi.nlm.nih.gov/protein/P04133.3	Hexon protein	http://www.uniprot.org/uniprot/P03277	Human adenovirus 5	http://purl.obolibrary.org/obo/NCBITaxon_28285	Human mastadenovirus C	http://purl.obolibrary.org/obo/NCBITaxon_129951	This conserved sequence is present in HAdV species A: 31 and C: 1, 2, 5.
64961	Linear peptide	TLNAWVKVV	ACCCTGAACGCCTGGGTGAAGGTGGTG	CAGGAGGGCTCGGCAaccctgaacgcctgggtgaaggtggtgGGATGCGGAGGGTCCGGCGGCCGCTCATCTCGTGCGACATCAAGCTATACTCTAATAT	19	27	Gag polyprotein	http://www.ncbi.nlm.nih.gov/protein/ABO73990.1	Gag polyprotein	http://www.uniprot.org/uniprot/P04591	Human immunodeficiency virus 1	http://purl.obolibrary.org/obo/NCBITaxon_11676	Human immunodeficiency virus 1	http://purl.obolibrary.org/obo/NCBITaxon_11676
64967	Linear peptide	TLNDLETDV	ACCCTGAACGACCTGGAGACCGACGTG	CAGGAGGGCTCGGCAaccctgaacgacctggagaccgacgtgGGATGCGGAGGGTCCGGCGGCCGCTCATCTCGTGCGACATCAAGCTATACTCTAATAT	341	349	Circumsporozoite protein, putative	http://www.ncbi.nlm.nih.gov/protein/P08677.2	Circumsporozoite protein, putative	http://www.uniprot.org/uniprot/A5KB63	Plasmodium vivax strain Belem	http://purl.obolibrary.org/obo/NCBITaxon_31273	Plasmodium vivax	http://purl.obolibrary.org/obo/NCBITaxon_5855
65043	Linear peptide	TLRKPKHKKL	ACCCTGAGGAAGCCCAAGCACAAGAAGCTG	CAGGAGGGCTCGGCAaccctgaggaagcccaagcacaagaagctgGGATGCGGAGGGTCCGGCGGCCGCTCATCTCGTGCGACATCAAGCTATACTCTAA	104	113	Circumsporozoite (CS) protein	http://www.ncbi.nlm.nih.gov/protein/P13814.1	Circumsporozoite (CS) protein	http://www.uniprot.org/uniprot/Q7K740	Plasmodium falciparum NF54	http://purl.obolibrary.org/obo/NCBITaxon_5843	Plasmodium falciparum	http://purl.obolibrary.org/obo/NCBITaxon_5833	Data originally imported from the HLA Ligand Database and recurated.
65151	Linear peptide	TLWVDPYEV	ACCCTGTGGGTGGACCCCTACGAGGTG	CAGGAGGGCTCGGCAaccctgtgggtggacccctacgaggtgGGATGCGGAGGGTCCGGCGGCCGCTCATCTCGTGCGACATCAAGCTATACTCTAATAT	101	109	Protein BTG2	http://www.ncbi.nlm.nih.gov/protein/NP_006754.1	Protein BTG2	http://www.uniprot.org/uniprot/P78543	Homo sapiens	http://purl.obolibrary.org/obo/NCBITaxon_9606	Homo sapiens	http://purl.obolibrary.org/obo/NCBITaxon_9606
65277	Linear peptide	TMYGGISLL	ACCATGTACGGCGGCATCAGCCTGCTG	CAGGAGGGCTCGGCAaccatgtacggcggcatcagcctgctgGGATGCGGAGGGTCCGGCGGCCGCTCATCTCGTGCGACATCAAGCTATACTCTAATAT	297	305	55 kDa immediate-early protein 1	http://www.ncbi.nlm.nih.gov/protein/AAR31666.1	55 kDa immediate-early protein 1	http://www.uniprot.org/uniprot/F5HCM1	Human betaherpesvirus 5	http://purl.obolibrary.org/obo/NCBITaxon_10359	Human betaherpesvirus 5	http://purl.obolibrary.org/obo/NCBITaxon_10359
65748	Linear peptide	TPRVTGGGAM	ACCCCCAGGGTGACCGGCGGCGGCGCCATG	CAGGAGGGCTCGGCAacccccagggtgaccggcggcggcgccatgGGATGCGGAGGGTCCGGCGGCCGCTCATCTCGTGCGACATCAAGCTATACTCTAA	417	426	65 kDa phosphoprotein	http://www.ncbi.nlm.nih.gov/protein/YP_002608275.1	65 kDa phosphoprotein	http://www.uniprot.org/uniprot/Q6SW59	Human betaherpesvirus 5	http://purl.obolibrary.org/obo/NCBITaxon_10359	Human betaherpesvirus 5	http://purl.obolibrary.org/obo/NCBITaxon_10359
68461	Linear peptide	VFFNILGGWV	GTGTTCTTCAACATCCTGGGCGGCTGGGTG	CAGGAGGGCTCGGCAgtgttcttcaacatcctgggcggctgggtgGGATGCGGAGGGTCCGGCGGCCGCTCATCTCGTGCGACATCAAGCTATACTCTAA	1813	1822	Genome polyprotein	http://www.ncbi.nlm.nih.gov/protein/ACZ60108.1	Genome polyprotein	http://www.uniprot.org/uniprot/P27958	Hepatitis C virus	http://purl.obolibrary.org/obo/NCBITaxon_11103	Hepatitis C virus	http://purl.obolibrary.org/obo/NCBITaxon_11103
68826	Linear peptide	VGYVDDTQF	GTGGGCTACGTGGACGACACCCAGTTC	CAGGAGGGCTCGGCAgtgggctacgtggacgacacccagttcGGATGCGGAGGGTCCGGCGGCCGCTCATCTCGTGCGACATCAAGCTATACTCTAATAT	49	57	HLA class I histocompatibility antigen, A-2 alpha chain	http://www.ncbi.nlm.nih.gov/protein/AAA87076.1	HLA class I histocompatibility antigen, A-2 alpha chain	http://www.uniprot.org/uniprot/P01892	Homo sapiens	http://purl.obolibrary.org/obo/NCBITaxon_9606	Homo sapiens	http://purl.obolibrary.org/obo/NCBITaxon_9606
68945	Linear peptide	VIFDFLHCI	GTGATCTTCGACTTCCTGCACTGCATC	CAGGAGGGCTCGGCAgtgatcttcgacttcctgcactgcatcGGATGCGGAGGGTCCGGCGGCCGCTCATCTCGTGCGACATCAAGCTATACTCTAATAT	406	414	Human polyomavirus 1 protein	http://www.ncbi.nlm.nih.gov/protein/AAT47414.1			Human polyomavirus 1	http://purl.obolibrary.org/obo/NCBITaxon_1891762	Human polyomavirus 1	http://purl.obolibrary.org/obo/NCBITaxon_1891762
68954	Linear peptide	VIGDQYVKV	GTGATCGGCGACCAGTACGTGAAGGTG	CAGGAGGGCTCGGCAgtgatcggcgaccagtacgtgaaggtgGGATGCGGAGGGTCCGGCGGCCGCTCATCTCGTGCGACATCAAGCTATACTCTAATAT	218	226	65 kDa phosphoprotein	http://www.ncbi.nlm.nih.gov/protein/P06725.2	65 kDa phosphoprotein	http://www.uniprot.org/uniprot/Q6SW59	Human herpesvirus 5 strain AD169	http://purl.obolibrary.org/obo/NCBITaxon_10360	Human betaherpesvirus 5	http://purl.obolibrary.org/obo/NCBITaxon_10359	The authors cite Swiss-Prot accession P06725 (GI: 130714) as the source of the epitope.
69169	Linear peptide	VIYQYMDDL	GTGATCTACCAGTACATGGACGACCTG	CAGGAGGGCTCGGCAgtgatctaccagtacatggacgacctgGGATGCGGAGGGTCCGGCGGCCGCTCATCTCGTGCGACATCAAGCTATACTCTAATAT	755	763	Gag-Pol polyprotein	http://www.ncbi.nlm.nih.gov/protein/BAC02534.1	Gag-Pol polyprotein	http://www.uniprot.org/uniprot/P04585	Human immunodeficiency virus 1	http://purl.obolibrary.org/obo/NCBITaxon_11676	Human immunodeficiency virus 1	http://purl.obolibrary.org/obo/NCBITaxon_11676
69349	Linear peptide	VLAALAAYCL	GTGCTGGCCGCCCTGGCCGCCTACTGCCTG	CAGGAGGGCTCGGCAgtgctggccgccctggccgcctactgcctgGGATGCGGAGGGTCCGGCGGCCGCTCATCTCGTGCGACATCAAGCTATACTCTAA	1666	1675	Genome polyprotein	http://www.ncbi.nlm.nih.gov/protein/P26663.3	Genome polyprotein	http://www.uniprot.org/uniprot/P27958	Hepatitis C virus	http://purl.obolibrary.org/obo/NCBITaxon_11103	Hepatitis C virus	http://purl.obolibrary.org/obo/NCBITaxon_11103	Imported from the TopBank database.
69370	Linear peptide	VLAGLLGNV	GTGCTGGCCGGCCTGCTGGGCAACGTG	CAGGAGGGCTCGGCAgtgctggccggcctgctgggcaacgtgGGATGCGGAGGGTCCGGCGGCCGCTCATCTCGTGCGACATCAAGCTATACTCTAATAT			Circumsporozoite-related antigen	https://ontology.iedb.org/ontology/ONTIE_0002686	Circumsporozoite-related antigen	http://www.uniprot.org/uniprot/Q8IIF0	Plasmodium falciparum	http://purl.obolibrary.org/obo/NCBITaxon_5833	Plasmodium falciparum	http://purl.obolibrary.org/obo/NCBITaxon_5833	Imported from the TopBank database (internal database of LIAI) and recurated.
69373	Linear peptide	VLAKDGTEV	GTGCTGGCCAAGGACGGCACCGAGGTG	CAGGAGGGCTCGGCAgtgctggccaaggacggcaccgaggtgGGATGCGGAGGGTCCGGCGGCCGCTCATCTCGTGCGACATCAAGCTATACTCTAATAT	50	58	Trans-sialidase, putative (UniProt:K4DVP7)	http://www.ncbi.nlm.nih.gov/protein/AAB18265.1	Trans-sialidase, putative	http://www.uniprot.org/uniprot/K4DVP7	Trypanosoma cruzi	http://purl.obolibrary.org/obo/NCBITaxon_5693	Trypanosoma cruzi	http://purl.obolibrary.org/obo/NCBITaxon_5693	Imported from the TopBank database.
69398	Linear peptide	VLCLRPVGA	GTGCTGTGCCTGAGGCCCGTGGGCGCC	CAGGAGGGCTCGGCAgtgctgtgcctgaggcccgtgggcgccGGATGCGGAGGGTCCGGCGGCCGCTCATCTCGTGCGACATCAAGCTATACTCTAATAT	15	23	Protein X	http://www.ncbi.nlm.nih.gov/protein/AAP06597.1	Protein X	http://www.uniprot.org/uniprot/Q69027	Hepatitis B virus	http://purl.obolibrary.org/obo/NCBITaxon_10407	Hepatitis B virus	http://purl.obolibrary.org/obo/NCBITaxon_10407
69420	Linear peptide	VLDKVEETV	GTGCTGGACAAGGTGGAGGAGACCGTG	CAGGAGGGCTCGGCAgtgctggacaaggtggaggagaccgtgGGATGCGGAGGGTCCGGCGGCCGCTCATCTCGTGCGACATCAAGCTATACTCTAATAT	982	990	Liver stage antigen 3	http://www.ncbi.nlm.nih.gov/protein/Q9U0P0	Liver stage antigen 3	http://www.uniprot.org/uniprot/O96275	Plasmodium falciparum	http://purl.obolibrary.org/obo/NCBITaxon_5833	Plasmodium falciparum	http://purl.obolibrary.org/obo/NCBITaxon_5833
69449	Linear peptide	VLEDVQAAGI	GTGCTGGAGGACGTGCAGGCCGCCGGCATC	CAGGAGGGCTCGGCAgtgctggaggacgtgcaggccgccggcatcGGATGCGGAGGGTCCGGCGGCCGCTCATCTCGTGCGACATCAAGCTATACTCTAA	159	168	Late transcription elongation factor H5	http://www.ncbi.nlm.nih.gov/protein/P20538.1	Late transcription elongation factor H5	http://www.uniprot.org/uniprot/P07242	Vaccinia virus Copenhagen	http://purl.obolibrary.org/obo/NCBITaxon_10249	Vaccinia virus	http://purl.obolibrary.org/obo/NCBITaxon_10245
69452	Linear peptide	VLEETSVML	GTGCTGGAGGAGACCAGCGTGATGCTG	CAGGAGGGCTCGGCAgtgctggaggagaccagcgtgatgctgGGATGCGGAGGGTCCGGCGGCCGCTCATCTCGTGCGACATCAAGCTATACTCTAATAT	316	324	55 kDa immediate-early protein 1	http://www.ncbi.nlm.nih.gov/protein/YP_002608299.1	55 kDa immediate-early protein 1	http://www.uniprot.org/uniprot/F5HCM1	Human betaherpesvirus 5	http://purl.obolibrary.org/obo/NCBITaxon_10359	Human betaherpesvirus 5	http://purl.obolibrary.org/obo/NCBITaxon_10359
69473	Linear peptide	VLEWRFDSRL	GTGCTGGAGTGGAGGTTCGACAGCAGGCTG	CAGGAGGGCTCGGCAgtgctggagtggaggttcgacagcaggctgGGATGCGGAGGGTCCGGCGGCCGCTCATCTCGTGCGACATCAAGCTATACTCTAA	180	189	Protein Nef	http://www.ncbi.nlm.nih.gov/protein/AAB60579.1	Protein Nef	http://www.uniprot.org/uniprot/P04601	Human immunodeficiency virus 1	http://purl.obolibrary.org/obo/NCBITaxon_11676	Human immunodeficiency virus 1	http://purl.obolibrary.org/obo/NCBITaxon_11676
69500	Linear peptide	VLGGCRHKL	GTGCTGGGCGGCTGCAGGCACAAGCTG	CAGGAGGGCTCGGCAgtgctgggcggctgcaggcacaagctgGGATGCGGAGGGTCCGGCGGCCGCTCATCTCGTGCGACATCAAGCTATACTCTAATAT	133	141	Protein X	http://www.ncbi.nlm.nih.gov/protein/BAG70907.1	Protein X	http://www.uniprot.org/uniprot/Q69027	Hepatitis B virus	http://purl.obolibrary.org/obo/NCBITaxon_10407	Hepatitis B virus	http://purl.obolibrary.org/obo/NCBITaxon_10407	Epitope sequence present in HBV subtypes adr, adw, and ayw.
69512	Linear peptide	VLGPISGHV	GTGCTGGGCCCCATCAGCGGCCACGTG	CAGGAGGGCTCGGCAgtgctgggccccatcagcggccacgtgGGATGCGGAGGGTCCGGCGGCCGCTCATCTCGTGCGACATCAAGCTATACTCTAATAT	14	22	65 kDa phosphoprotein	http://www.ncbi.nlm.nih.gov/protein/P06725.2	65 kDa phosphoprotein	http://www.uniprot.org/uniprot/Q6SW59	Human herpesvirus 5 strain AD169	http://purl.obolibrary.org/obo/NCBITaxon_10360	Human betaherpesvirus 5	http://purl.obolibrary.org/obo/NCBITaxon_10359	The following refers to the epitope id as found in the original FIMM database: P001240
69514	Linear peptide	VLGRLDQKL	GTGCTGGGCAGGCTGGACCAGAAGCTG	CAGGAGGGCTCGGCAgtgctgggcaggctggaccagaagctgGGATGCGGAGGGTCCGGCGGCCGCTCATCTCGTGCGACATCAAGCTATACTCTAATAT	166	174	Alanine and proline-rich secreted protein Apa	http://www.ncbi.nlm.nih.gov/protein/Q50906.1	Alanine and proline-rich secreted protein Apa	http://www.uniprot.org/uniprot/P9WIR7	Mycobacterium tuberculosis	http://purl.obolibrary.org/obo/NCBITaxon_1773	Mycobacterium tuberculosis	http://purl.obolibrary.org/obo/NCBITaxon_1773
69524	Linear peptide	VLHKRTLGL	GTGCTGCACAAGAGGACCCTGGGCCTG	CAGGAGGGCTCGGCAgtgctgcacaagaggaccctgggcctgGGATGCGGAGGGTCCGGCGGCCGCTCATCTCGTGCGACATCAAGCTATACTCTAATAT	92	100	Protein X	http://www.ncbi.nlm.nih.gov/protein/ACH95876.1	Protein X	http://www.uniprot.org/uniprot/Q69027	Hepatitis B virus	http://purl.obolibrary.org/obo/NCBITaxon_10407	Hepatitis B virus	http://purl.obolibrary.org/obo/NCBITaxon_10407	Epitope sequence present in HBV subtypes adr, adw, and ayw.
69598	Linear peptide	VLLGGVGLVL	GTGCTGCTGGGCGGCGTGGGCCTGGTGCTG	CAGGAGGGCTCGGCAgtgctgctgggcggcgtgggcctggtgctgGGATGCGGAGGGTCCGGCGGCCGCTCATCTCGTGCGACATCAAGCTATACTCTAA	91	100	Circumsporozoite-related antigen	http://www.ncbi.nlm.nih.gov/protein/P04926.2	Circumsporozoite-related antigen	http://www.uniprot.org/uniprot/Q8IIF0	Plasmodium falciparum	http://purl.obolibrary.org/obo/NCBITaxon_5833	Plasmodium falciparum	http://purl.obolibrary.org/obo/NCBITaxon_5833	Imported from the TopBank database (internal database of LIAI) and recurated.
69616	Linear peptide	VLLNAPSEA	GTGCTGCTGAACGCCCCCAGCGAGGCC	CAGGAGGGCTCGGCAgtgctgctgaacgcccccagcgaggccGGATGCGGAGGGTCCGGCGGCCGCTCATCTCGTGCGACATCAAGCTATACTCTAATAT	94	102	Envelope glycoprotein D	http://www.ncbi.nlm.nih.gov/protein/ABM66847.1	Envelope glycoprotein D	http://www.uniprot.org/uniprot/Q69091	Human alphaherpesvirus 1	http://purl.obolibrary.org/obo/NCBITaxon_10298	Human alphaherpesvirus 1	http://purl.obolibrary.org/obo/NCBITaxon_10298
69617	Linear peptide	VLLNGWRWRL	GTGCTGCTGAACGGCTGGAGGTGGAGGCTG	CAGGAGGGCTCGGCAgtgctgctgaacggctggaggtggaggctgGGATGCGGAGGGTCCGGCGGCCGCTCATCTCGTGCGACATCAAGCTATACTCTAA	16	25	Protein K12	http://www.ncbi.nlm.nih.gov/protein/AAC57155.1	Protein K12	http://www.uniprot.org/uniprot/Q77Q38	Human gammaherpesvirus 8	http://purl.obolibrary.org/obo/NCBITaxon_37296	Human gammaherpesvirus 8	http://purl.obolibrary.org/obo/NCBITaxon_37296	Imported from the TopBank database then fully recurated by the IEDB staff. The natural source of this peptide is Kaposin protein of Kaposi's sarcoma-associated herpes virus. The homolog of this peptide was not found in Genbank or Swissprot database at the time of curation.
69622	Linear peptide	VLLPSLFLL	GTGCTGCTGCCCAGCCTGTTCCTGCTG	CAGGAGGGCTCGGCAgtgctgctgcccagcctgttcctgctgGGATGCGGAGGGTCCGGCGGCCGCTCATCTCGTGCGACATCAAGCTATACTCTAATAT	818	826	Trans-sialidase, putative (UniProt:K4E505)	http://www.ncbi.nlm.nih.gov/protein/AAA30259.1	Trans-sialidase, putative	http://www.uniprot.org/uniprot/K4E505	Trypanosoma cruzi	http://purl.obolibrary.org/obo/NCBITaxon_5693	Trypanosoma cruzi	http://purl.obolibrary.org/obo/NCBITaxon_5693	Imported from the TopBank database.
69623	Linear peptide	VLLPSLFLLL	GTGCTGCTGCCCAGCCTGTTCCTGCTGCTG	CAGGAGGGCTCGGCAgtgctgctgcccagcctgttcctgctgctgGGATGCGGAGGGTCCGGCGGCCGCTCATCTCGTGCGACATCAAGCTATACTCTAA	818	827	Trans-sialidase, putative (UniProt:K4E505)	http://www.ncbi.nlm.nih.gov/protein/AAA30259.1	Trans-sialidase, putative	http://www.uniprot.org/uniprot/K4E505	Trypanosoma cruzi	http://purl.obolibrary.org/obo/NCBITaxon_5693	Trypanosoma cruzi	http://purl.obolibrary.org/obo/NCBITaxon_5693	Imported from the TopBank database.
69631	Linear peptide	VLLVSLGAI	GTGCTGCTGGTGAGCCTGGGCGCCATC	CAGGAGGGCTCGGCAgtgctgctggtgagcctgggcgccatcGGATGCGGAGGGTCCGGCGGCCGCTCATCTCGTGCGACATCAAGCTATACTCTAATAT	541	549	Hemagglutinin	http://www.ncbi.nlm.nih.gov/protein/CAC86622.1	Hemagglutinin	http://www.uniprot.org/uniprot/P03452	Influenza A virus (A/New Caledonia/20/1999(H1N1))	http://purl.obolibrary.org/obo/NCBITaxon_381512	Influenza A virus	http://purl.obolibrary.org/obo/NCBITaxon_11320
69646	Linear peptide	VLMGGVPGVE	GTGCTGATGGGCGGCGTGCCCGGCGTGGAG	CAGGAGGGCTCGGCAgtgctgatgggcggcgtgcccggcgtggagGGATGCGGAGGGTCCGGCGGCCGCTCATCTCGTGCGACATCAAGCTATACTCTAA	158	167	Alanine dehydrogenase	http://www.ncbi.nlm.nih.gov/protein/P30234.2	Alanine dehydrogenase	http://www.uniprot.org/uniprot/P9WQB1	Mycobacterium tuberculosis	http://purl.obolibrary.org/obo/NCBITaxon_1773	Mycobacterium tuberculosis	http://purl.obolibrary.org/obo/NCBITaxon_1773
69649	Linear peptide	VLMIKALEL	GTGCTGATGATCAAGGCCCTGGAGCTG	CAGGAGGGCTCGGCAgtgctgatgatcaaggccctggagctgGGATGCGGAGGGTCCGGCGGCCGCTCATCTCGTGCGACATCAAGCTATACTCTAATAT	741	749	Myosin-9	http://www.ncbi.nlm.nih.gov/protein/NP_002464.1	Myosin-9	http://www.uniprot.org/uniprot/P35579	Homo sapiens	http://purl.obolibrary.org/obo/NCBITaxon_9606	Homo sapiens	http://purl.obolibrary.org/obo/NCBITaxon_9606
69657	Linear peptide	VLNDILSRL	GTGCTGAACGACATCCTGAGCAGGCTG	CAGGAGGGCTCGGCAgtgctgaacgacatcctgagcaggctgGGATGCGGAGGGTCCGGCGGCCGCTCATCTCGTGCGACATCAAGCTATACTCTAATAT	958	966	Spike glycoprotein	http://www.ncbi.nlm.nih.gov/protein/ABF65836.1	Spike glycoprotein	http://www.uniprot.org/uniprot/P59594	SARS coronavirus	http://purl.obolibrary.org/obo/NCBITaxon_227859	SARS-related coronavirus	http://purl.obolibrary.org/obo/NCBITaxon_694009
69661	Linear peptide	VLNETTNWL	GTGCTGAACGAGACCACCAACTGGCTG	CAGGAGGGCTCGGCAgtgctgaacgagaccaccaactggctgGGATGCGGAGGGTCCGGCGGCCGCTCATCTCGTGCGACATCAAGCTATACTCTAATAT	2900	2908	Genome polyprotein	http://www.ncbi.nlm.nih.gov/protein/NP_041724.2	Genome polyprotein	http://www.uniprot.org/uniprot/P14335	West Nile virus	http://purl.obolibrary.org/obo/NCBITaxon_11082	West Nile virus	http://purl.obolibrary.org/obo/NCBITaxon_11082
69671	Linear peptide	VLNPYMPSV	GTGCTGAACCCCTACATGCCCAGCGTG	CAGGAGGGCTCGGCAgtgctgaacccctacatgcccagcgtgGGATGCGGAGGGTCCGGCGGCCGCTCATCTCGTGCGACATCAAGCTATACTCTAATAT	2659	2667	Genome polyprotein	http://www.ncbi.nlm.nih.gov/protein/AOE47565.1			Dengue virus 2	http://purl.obolibrary.org/obo/NCBITaxon_11060	Dengue virus	http://purl.obolibrary.org/obo/NCBITaxon_12637
69682	Linear peptide	VLPDVFIRC	GTGCTGCCCGACGTGTTCATCAGGTGC	CAGGAGGGCTCGGCAgtgctgcccgacgtgttcatcaggtgcGGATGCGGAGGGTCCGGCGGCCGCTCATCTCGTGCGACATCAAGCTATACTCTAATAT											The epitope is part of the N-acetyl-glucosaminyl-transferase V gene intron
69686	Linear peptide	VLPFDIKKL	GTGCTGCCCTTCGACATCAAGAAGCTG	CAGGAGGGCTCGGCAgtgctgcccttcgacatcaagaagctgGGATGCGGAGGGTCCGGCGGCCGCTCATCTCGTGCGACATCAAGCTATACTCTAATAT	498	506	Early transcription factor 70 kDa subunit	http://www.ncbi.nlm.nih.gov/protein/AGK06580.1	Early transcription factor 70 kDa subunit	http://www.uniprot.org/uniprot/P04308	Vaccinia virus	http://purl.obolibrary.org/obo/NCBITaxon_10245	Vaccinia virus	http://purl.obolibrary.org/obo/NCBITaxon_10245
69719	Linear peptide	VLQELNVTV	GTGCTGCAGGAGCTGAACGTGACCGTG	CAGGAGGGCTCGGCAgtgctgcaggagctgaacgtgaccgtgGGATGCGGAGGGTCCGGCGGCCGCTCATCTCGTGCGACATCAAGCTATACTCTAATAT	169	177	Myeloblastin	http://www.ncbi.nlm.nih.gov/protein/NP_002768.3	Myeloblastin	http://www.uniprot.org/uniprot/P24158	Homo sapiens	http://purl.obolibrary.org/obo/NCBITaxon_9606	Homo sapiens	http://purl.obolibrary.org/obo/NCBITaxon_9606
69731	Linear peptide	VLQWASLAV	GTGCTGCAGTGGGCCAGCCTGGCCGTG	CAGGAGGGCTCGGCAgtgctgcagtgggccagcctggccgtgGGATGCGGAGGGTCCGGCGGCCGCTCATCTCGTGCGACATCAAGCTATACTCTAATAT	863	871	Envelope glycoprotein GP350	http://www.ncbi.nlm.nih.gov/protein/Q66537	Envelope glycoprotein GP350	http://www.uniprot.org/uniprot/P03200	Human gammaherpesvirus 4	http://purl.obolibrary.org/obo/NCBITaxon_10376	Human gammaherpesvirus 4	http://purl.obolibrary.org/obo/NCBITaxon_10376
69751	Linear peptide	VLSDFKTWL	GTGCTGAGCGACTTCAAGACCTGGCTG	CAGGAGGGCTCGGCAgtgctgagcgacttcaagacctggctgGGATGCGGAGGGTCCGGCGGCCGCTCATCTCGTGCGACATCAAGCTATACTCTAATAT	1989	1997	Genome polyprotein	http://www.ncbi.nlm.nih.gov/protein/ACE82359.1	Genome polyprotein	http://www.uniprot.org/uniprot/P27958	Hepatitis C virus subtype 1a	http://purl.obolibrary.org/obo/NCBITaxon_31646	Hepatitis C virus	http://purl.obolibrary.org/obo/NCBITaxon_11103
69798	Linear peptide	VLTDGNPPEV	GTGCTGACCGACGGCAACCCCCCCGAGGTG	CAGGAGGGCTCGGCAgtgctgaccgacggcaacccccccgaggtgGGATGCGGAGGGTCCGGCGGCCGCTCATCTCGTGCGACATCAAGCTATACTCTAA	88	97	Lipoprotein LpqH (UniProt:P9WK61)	http://www.ncbi.nlm.nih.gov/protein/NP_338420.1	Lipoprotein LpqH	http://www.uniprot.org/uniprot/P9WK61	Mycobacterium tuberculosis	http://purl.obolibrary.org/obo/NCBITaxon_1773	Mycobacterium tuberculosis	http://purl.obolibrary.org/obo/NCBITaxon_1773
69858	Linear peptide	VLYDEFVTI	GTGCTGTACGACGAGTTCGTGACCATC	CAGGAGGGCTCGGCAgtgctgtacgacgagttcgtgaccatcGGATGCGGAGGGTCCGGCGGCCGCTCATCTCGTGCGACATCAAGCTATACTCTAATAT	6	14	Protein A6	http://www.ncbi.nlm.nih.gov/protein/P20985.1	Protein A6	http://www.uniprot.org/uniprot/P29192	Vaccinia virus Copenhagen	http://purl.obolibrary.org/obo/NCBITaxon_10249	Vaccinia virus	http://purl.obolibrary.org/obo/NCBITaxon_10245
69906	Linear peptide	VLYRYGSFSV	GTGCTGTACAGGTACGGCAGCTTCAGCGTG	CAGGAGGGCTCGGCAgtgctgtacaggtacggcagcttcagcgtgGGATGCGGAGGGTCCGGCGGCCGCTCATCTCGTGCGACATCAAGCTATACTCTAA	483	492	Melanocyte protein PMEL	http://www.ncbi.nlm.nih.gov/protein/AAA35930.1	Melanocyte protein PMEL	http://www.uniprot.org/uniprot/P40967	Homo sapiens	http://purl.obolibrary.org/obo/NCBITaxon_9606	Homo sapiens	http://purl.obolibrary.org/obo/NCBITaxon_9606
69907	Linear peptide	VLYSPNVSV	GTGCTGTACAGCCCCAACGTGAGCGTG	CAGGAGGGCTCGGCAgtgctgtacagccccaacgtgagcgtgGGATGCGGAGGGTCCGGCGGCCGCTCATCTCGTGCGACATCAAGCTATACTCTAATAT	239	247	Envelope glycoprotein gp62	http://www.ncbi.nlm.nih.gov/protein/BAK20487.1	Envelope glycoprotein gp62	http://www.uniprot.org/uniprot/P14075	Human T-lymphotropic virus 1	http://purl.obolibrary.org/obo/NCBITaxon_11908	Primate T-lymphotropic virus 1	http://purl.obolibrary.org/obo/NCBITaxon_194440	The epitope sequence was cited in Yashiki et al. AIDS Res Hum Retroviruses. 2001 Jul 20;17(11):1047-61[PMID:11485622].
69913	Linear peptide	VMACLVPAA	GTGATGGCCTGCCTGGTGCCCGCCGCC	CAGGAGGGCTCGGCAgtgatggcctgcctggtgcccgccgccGGATGCGGAGGGTCCGGCGGCCGCTCATCTCGTGCGACATCAAGCTATACTCTAATAT	16	24	Cysteine peptidase, putative,cysteine peptidase, clan CA, family C1, cathepsin L-like, putative (UniProt:K4DPT9)	http://www.ncbi.nlm.nih.gov/protein/A45629	Cysteine peptidase, putative,cysteine peptidase, clan CA, family C1, cathepsin L-like, putative	http://www.uniprot.org/uniprot/K4DPT9	Trypanosoma cruzi	http://purl.obolibrary.org/obo/NCBITaxon_5693	Trypanosoma cruzi	http://purl.obolibrary.org/obo/NCBITaxon_5693
69921	Linear peptide	VMAPRTLIL	GTGATGGCCCCCAGGACCCTGATCCTG	CAGGAGGGCTCGGCAgtgatggcccccaggaccctgatcctgGGATGCGGAGGGTCCGGCGGCCGCTCATCTCGTGCGACATCAAGCTATACTCTAATAT	3	11	HLA class I histocompatibility antigen, Cw-3 alpha chain	http://www.ncbi.nlm.nih.gov/protein/P04222.2	HLA class I histocompatibility antigen, Cw-3 alpha chain	http://www.uniprot.org/uniprot/P04222	Homo sapiens	http://purl.obolibrary.org/obo/NCBITaxon_9606	Homo sapiens	http://purl.obolibrary.org/obo/NCBITaxon_9606
69922	Linear peptide	VMAPRTLVL	GTGATGGCCCCCAGGACCCTGGTGCTG	CAGGAGGGCTCGGCAgtgatggcccccaggaccctggtgctgGGATGCGGAGGGTCCGGCGGCCGCTCATCTCGTGCGACATCAAGCTATACTCTAATAT	3	11	HLA class I histocompatibility antigen, A-2 alpha chain	http://www.ncbi.nlm.nih.gov/protein/ANJ45898.1	HLA class I histocompatibility antigen, A-2 alpha chain	http://www.uniprot.org/uniprot/P01892	Homo sapiens	http://purl.obolibrary.org/obo/NCBITaxon_9606	Homo sapiens	http://purl.obolibrary.org/obo/NCBITaxon_9606
69939	Linear peptide	VMDSKIVQV	GTGATGGACAGCAAGATCGTGCAGGTG	CAGGAGGGCTCGGCAgtgatggacagcaagatcgtgcaggtgGGATGCGGAGGGTCCGGCGGCCGCTCATCTCGTGCGACATCAAGCTATACTCTAATAT	432	440	Importin subunit alpha-7	http://www.ncbi.nlm.nih.gov/protein/O60684.1	Importin subunit alpha-7	http://www.uniprot.org/uniprot/O60684	Homo sapiens	http://purl.obolibrary.org/obo/NCBITaxon_9606	Homo sapiens	http://purl.obolibrary.org/obo/NCBITaxon_9606
69980	Linear peptide	VMLAAQMFIV	GTGATGCTGGCCGCCCAGATGTTCATCGTG	CAGGAGGGCTCGGCAgtgatgctggccgcccagatgttcatcgtgGGATGCGGAGGGTCCGGCGGCCGCTCATCTCGTGCGACATCAAGCTATACTCTAA	284	293	Genome polyprotein	http://www.ncbi.nlm.nih.gov/protein/AAF01178.1	Genome polyprotein	http://www.uniprot.org/uniprot/P27958	Hepatitis C virus subtype 2a	http://purl.obolibrary.org/obo/NCBITaxon_31649	Hepatitis C virus	http://purl.obolibrary.org/obo/NCBITaxon_11103
69996	Linear peptide	VMMSCSSEA	GTGATGATGAGCTGCAGCAGCGAGGCC	CAGGAGGGCTCGGCAgtgatgatgagctgcagcagcgaggccGGATGCGGAGGGTCCGGCGGCCGCTCATCTCGTGCGACATCAAGCTATACTCTAATAT	16	24	Trans-sialidase, putative (UniProt:K4DPA8)	http://www.ncbi.nlm.nih.gov/protein/JH0823	Trans-sialidase, putative	http://www.uniprot.org/uniprot/K4DPA8	Trypanosoma cruzi	http://purl.obolibrary.org/obo/NCBITaxon_5693	Trypanosoma cruzi	http://purl.obolibrary.org/obo/NCBITaxon_5693
71409	Linear peptide	VTLPTGQCL	GTGACCCTGCCCACCGGCCAGTGCCTG	CAGGAGGGCTCGGCAgtgaccctgcccaccggccagtgcctgGGATGCGGAGGGTCCGGCGGCCGCTCATCTCGTGCGACATCAAGCTATACTCTAATAT	378	386	Cysteine peptidase, putative,cysteine peptidase, clan CA, family C1, cathepsin L-like, putative (UniProt:K4DPT9)	http://www.ncbi.nlm.nih.gov/protein/A45629	Cysteine peptidase, putative,cysteine peptidase, clan CA, family C1, cathepsin L-like, putative	http://www.uniprot.org/uniprot/K4DPT9	Trypanosoma cruzi	http://purl.obolibrary.org/obo/NCBITaxon_5693	Trypanosoma cruzi	http://purl.obolibrary.org/obo/NCBITaxon_5693
71657	Linear peptide	VVFDITKWLL	GTGGTGTTCGACATCACCAAGTGGCTGCTG	CAGGAGGGCTCGGCAgtggtgttcgacatcaccaagtggctgctgGGATGCGGAGGGTCCGGCGGCCGCTCATCTCGTGCGACATCAAGCTATACTCTAA	888	897	Genome polyprotein	http://www.ncbi.nlm.nih.gov/protein/AAF01178.1	Genome polyprotein	http://www.uniprot.org/uniprot/P27958	Hepatitis C virus subtype 2a	http://purl.obolibrary.org/obo/NCBITaxon_31649	Hepatitis C virus	http://purl.obolibrary.org/obo/NCBITaxon_11103
71658	Linear peptide	VVFEDVKGT	GTGGTGTTCGAGGACGTGAAGGGCACC	CAGGAGGGCTCGGCAgtggtgttcgaggacgtgaagggcaccGGATGCGGAGGGTCCGGCGGCCGCTCATCTCGTGCGACATCAAGCTATACTCTAATAT	472	480	Human polyomavirus 1 protein	http://www.ncbi.nlm.nih.gov/protein/AAT47414.1			Human polyomavirus 1	http://purl.obolibrary.org/obo/NCBITaxon_1891762	Human polyomavirus 1	http://purl.obolibrary.org/obo/NCBITaxon_1891762
71663	Linear peptide	VVFLHVTYV	GTGGTGTTCCTGCACGTGACCTACGTG	CAGGAGGGCTCGGCAgtggtgttcctgcacgtgacctacgtgGGATGCGGAGGGTCCGGCGGCCGCTCATCTCGTGCGACATCAAGCTATACTCTAATAT	1042	1050	Spike glycoprotein	http://www.ncbi.nlm.nih.gov/protein/P59594.1	Spike glycoprotein	http://www.uniprot.org/uniprot/P59594	SARS coronavirus	http://purl.obolibrary.org/obo/NCBITaxon_227859	SARS-related coronavirus	http://purl.obolibrary.org/obo/NCBITaxon_694009
71734	Linear peptide	VVLDSLDPMV	GTGGTGCTGGACAGCCTGGACCCCATGGTG	CAGGAGGGCTCGGCAgtggtgctggacagcctggaccccatggtgGGATGCGGAGGGTCCGGCGGCCGCTCATCTCGTGCGACATCAAGCTATACTCTAA	2251	2260	Genome polyprotein	http://www.ncbi.nlm.nih.gov/protein/AAF01178.1	Genome polyprotein	http://www.uniprot.org/uniprot/P27958	Hepatitis C virus subtype 2a	http://purl.obolibrary.org/obo/NCBITaxon_31649	Hepatitis C virus	http://purl.obolibrary.org/obo/NCBITaxon_11103
71756	Linear peptide	VVMACLVPAA	GTGGTGATGGCCTGCCTGGTGCCCGCCGCC	CAGGAGGGCTCGGCAgtggtgatggcctgcctggtgcccgccgccGGATGCGGAGGGTCCGGCGGCCGCTCATCTCGTGCGACATCAAGCTATACTCTAA	15	24	Cysteine peptidase, putative,cysteine peptidase, clan CA, family C1, cathepsin L-like, putative (UniProt:K4DPT9)	http://www.ncbi.nlm.nih.gov/protein/A45629	Cysteine peptidase, putative,cysteine peptidase, clan CA, family C1, cathepsin L-like, putative	http://www.uniprot.org/uniprot/K4DPT9	Trypanosoma cruzi	http://purl.obolibrary.org/obo/NCBITaxon_5693	Trypanosoma cruzi	http://purl.obolibrary.org/obo/NCBITaxon_5693
72266	Linear peptide	WATESPIYV	TGGGCCACCGAGAGCCCCATCTACGTG	CAGGAGGGCTCGGCAtgggccaccgagagccccatctacgtgGGATGCGGAGGGTCCGGCGGCCGCTCATCTCGTGCGACATCAAGCTATACTCTAATAT	238	246	Protein ORF73	http://www.ncbi.nlm.nih.gov/protein/YP_001129431.1	Protein ORF73	http://www.uniprot.org/uniprot/Q9QR71	Human gammaherpesvirus 8	http://purl.obolibrary.org/obo/NCBITaxon_37296	Human gammaherpesvirus 8	http://purl.obolibrary.org/obo/NCBITaxon_37296
72621	Linear peptide	WIIKNSWTA	TGGATCATCAAGAACAGCTGGACCGCC	CAGGAGGGCTCGGCAtggatcatcaagaacagctggaccgccGGATGCGGAGGGTCCGGCGGCCGCTCATCTCGTGCGACATCAAGCTATACTCTAATAT	300	308	Cysteine peptidase, putative,cysteine peptidase, clan CA, family C1, cathepsin L-like, putative (UniProt:K4DPT9)	http://www.ncbi.nlm.nih.gov/protein/A45629	Cysteine peptidase, putative,cysteine peptidase, clan CA, family C1, cathepsin L-like, putative	http://www.uniprot.org/uniprot/K4DPT9	Trypanosoma cruzi	http://purl.obolibrary.org/obo/NCBITaxon_5693	Trypanosoma cruzi	http://purl.obolibrary.org/obo/NCBITaxon_5693
72721	Linear peptide	WLGNHGFEV	TGGCTGGGCAACCACGGCTTCGAGGTG	CAGGAGGGCTCGGCAtggctgggcaaccacggcttcgaggtgGGATGCGGAGGGTCCGGCGGCCGCTCATCTCGTGCGACATCAAGCTATACTCTAATAT	110	118	Other Francisella tularensis protein	http://www.ncbi.nlm.nih.gov/protein/YP_169869.1			Francisella tularensis subsp. tularensis SCHU S4	http://purl.obolibrary.org/obo/NCBITaxon_177416	Francisella tularensis	http://purl.obolibrary.org/obo/NCBITaxon_263
72722	Linear peptide	WLGNIIQYA	TGGCTGGGCAACATCATCCAGTACGCC	CAGGAGGGCTCGGCAtggctgggcaacatcatccagtacgccGGATGCGGAGGGTCCGGCGGCCGCTCATCTCGTGCGACATCAAGCTATACTCTAATAT	2850	2858	Genome polyprotein	http://www.ncbi.nlm.nih.gov/protein/AAF01178.1	Genome polyprotein	http://www.uniprot.org/uniprot/P27958	Hepatitis C virus subtype 2a	http://purl.obolibrary.org/obo/NCBITaxon_31649	Hepatitis C virus	http://purl.obolibrary.org/obo/NCBITaxon_11103
72731	Linear peptide	WLIGFDFDV	TGGCTGATCGGCTTCGACTTCGACGTG	CAGGAGGGCTCGGCAtggctgatcggcttcgacttcgacgtgGGATGCGGAGGGTCCGGCGGCCGCTCATCTCGTGCGACATCAAGCTATACTCTAATAT	294	302	Soluble interferon alpha/beta receptor B18	http://www.ncbi.nlm.nih.gov/protein/AAO89479.1	Soluble interferon alpha/beta receptor B18	http://www.uniprot.org/uniprot/P25213	Vaccinia virus WR	http://purl.obolibrary.org/obo/NCBITaxon_10254	Vaccinia virus	http://purl.obolibrary.org/obo/NCBITaxon_10245
72790	Linear peptide	WLSDCGEAL	TGGCTGAGCGACTGCGGCGAGGCCCTG	CAGGAGGGCTCGGCAtggctgagcgactgcggcgaggccctgGGATGCGGAGGGTCCGGCGGCCGCTCATCTCGTGCGACATCAAGCTATACTCTAATAT	457	465	Trans-sialidase, putative (UniProt:K4DPA8)	http://www.ncbi.nlm.nih.gov/protein/JH0823	Trans-sialidase, putative	http://www.uniprot.org/uniprot/K4DPA8	Trypanosoma cruzi	http://purl.obolibrary.org/obo/NCBITaxon_5693	Trypanosoma cruzi	http://purl.obolibrary.org/obo/NCBITaxon_5693
72794	Linear peptide	WLSLLVPFV	TGGCTGAGCCTGCTGGTGCCCTTCGTG	CAGGAGGGCTCGGCAtggctgagcctgctggtgcccttcgtgGGATGCGGAGGGTCCGGCGGCCGCTCATCTCGTGCGACATCAAGCTATACTCTAATAT	335	343	Large envelope protein	http://www.ncbi.nlm.nih.gov/protein/BAF48755.1	Large envelope protein	http://www.uniprot.org/uniprot/Q76R62	Hepatitis B virus	http://purl.obolibrary.org/obo/NCBITaxon_10407	Hepatitis B virus	http://purl.obolibrary.org/obo/NCBITaxon_10407
72865	Linear peptide	WMNRLIAFA	TGGATGAACAGGCTGATCGCCTTCGCC	CAGGAGGGCTCGGCAtggatgaacaggctgatcgccttcgccGGATGCGGAGGGTCCGGCGGCCGCTCATCTCGTGCGACATCAAGCTATACTCTAATAT	1915	1923	Genome polyprotein	http://www.ncbi.nlm.nih.gov/protein/ABV46054.1	Genome polyprotein	http://www.uniprot.org/uniprot/P27958	Hepatitis C virus genotype 1	http://purl.obolibrary.org/obo/NCBITaxon_41856	Hepatitis C virus	http://purl.obolibrary.org/obo/NCBITaxon_11103	The epitope sequence is conserved among HCV genotypes 1a and 1b. The epitope is part of the NS4b protein.
73195	Linear peptide	WVFPESISPV	TGGGTGTTCCCCGAGAGCATCAGCCCCGTG	CAGGAGGGCTCGGCAtgggtgttccccgagagcatcagccccgtgGGATGCGGAGGGTCCGGCGGCCGCTCATCTCGTGCGACATCAAGCTATACTCTAA	302	311	Trans-sialidase, putative (UniProt:K4DXB0)	http://www.ncbi.nlm.nih.gov/protein/AAC47720.1	Trans-sialidase, putative	http://www.uniprot.org/uniprot/K4DXB0	Trypanosoma cruzi	http://purl.obolibrary.org/obo/NCBITaxon_5693	Trypanosoma cruzi	http://purl.obolibrary.org/obo/NCBITaxon_5693	Imported from the TopBank database.
73263	Linear peptide	WYELSKINP	TGGTACGAGCTGAGCAAGATCAACCCC	CAGGAGGGCTCGGCAtggtacgagctgagcaagatcaaccccGGATGCGGAGGGTCCGGCGGCCGCTCATCTCGTGCGACATCAAGCTATACTCTAATAT	494	502	Envelope glycoprotein B	http://www.ncbi.nlm.nih.gov/protein/AAB62592.1	Envelope glycoprotein B	http://www.uniprot.org/uniprot/F5HB81	Human gammaherpesvirus 8	http://purl.obolibrary.org/obo/NCBITaxon_37296	Human gammaherpesvirus 8	http://purl.obolibrary.org/obo/NCBITaxon_37296
73710	Linear peptide	YELSKINPT	TACGAGCTGAGCAAGATCAACCCCACC	CAGGAGGGCTCGGCAtacgagctgagcaagatcaaccccaccGGATGCGGAGGGTCCGGCGGCCGCTCATCTCGTGCGACATCAAGCTATACTCTAATAT	495	503	Envelope glycoprotein B	http://www.ncbi.nlm.nih.gov/protein/AAB62592.1	Envelope glycoprotein B	http://www.uniprot.org/uniprot/F5HB81	Human gammaherpesvirus 8	http://purl.obolibrary.org/obo/NCBITaxon_37296	Human gammaherpesvirus 8	http://purl.obolibrary.org/obo/NCBITaxon_37296
74015	Linear peptide	YGIENEVFL	TACGGCATCGAGAACGAGGTGTTCCTG	CAGGAGGGCTCGGCAtacggcatcgagaacgaggtgttcctgGGATGCGGAGGGTCCGGCGGCCGCTCATCTCGTGCGACATCAAGCTATACTCTAATAT	281	289	L-lactate dehydrogenase B chain	http://www.ncbi.nlm.nih.gov/protein/1I0Z_A	L-lactate dehydrogenase B chain	http://www.uniprot.org/uniprot/P07195	Homo sapiens	http://purl.obolibrary.org/obo/NCBITaxon_9606	Homo sapiens	http://purl.obolibrary.org/obo/NCBITaxon_9606
74185	Linear peptide	YIDISDVKV	TACATCGACATCAGCGACGTGAAGGTG	CAGGAGGGCTCGGCAtacatcgacatcagcgacgtgaaggtgGGATGCGGAGGGTCCGGCGGCCGCTCATCTCGTGCGACATCAAGCTATACTCTAATAT	122	130	Telomere-binding protein I1	http://www.ncbi.nlm.nih.gov/protein/P20498.1	Telomere-binding protein I1	http://www.uniprot.org/uniprot/P16714	Vaccinia virus Copenhagen	http://purl.obolibrary.org/obo/NCBITaxon_10249	Vaccinia virus	http://purl.obolibrary.org/obo/NCBITaxon_10245
74223	Linear peptide	YIGSGDSPV	TACATCGGCAGCGGCGACAGCCCCGTG	CAGGAGGGCTCGGCAtacatcggcagcggcgacagccccgtgGGATGCGGAGGGTCCGGCGGCCGCTCATCTCGTGCGACATCAAGCTATACTCTAATAT	65	73	differentiation antigen	http://www.ncbi.nlm.nih.gov/protein/AAA51948.1	Myeloid cell surface antigen CD33	http://www.uniprot.org/uniprot/P20138	Homo sapiens	http://purl.obolibrary.org/obo/NCBITaxon_9606	Homo sapiens	http://purl.obolibrary.org/obo/NCBITaxon_9606	This peptide was designed by altering two amino acid residues within the native CD33 peptide (AIISGDSPV).	analog
74234	Linear peptide	YIIIGDSPV	TACATCATCATCGGCGACAGCCCCGTG	CAGGAGGGCTCGGCAtacatcatcatcggcgacagccccgtgGGATGCGGAGGGTCCGGCGGCCGCTCATCTCGTGCGACATCAAGCTATACTCTAATAT	65	73	differentiation antigen	http://www.ncbi.nlm.nih.gov/protein/AAA51948.1	Myeloid cell surface antigen CD33	http://www.uniprot.org/uniprot/P20138	Homo sapiens	http://purl.obolibrary.org/obo/NCBITaxon_9606	Homo sapiens	http://purl.obolibrary.org/obo/NCBITaxon_9606	This peptide was designed by altering two amino acid residues within the native CD33 peptide (AIISGDSPV).	analog
74241	Linear peptide	YIILGDSPV	TACATCATCCTGGGCGACAGCCCCGTG	CAGGAGGGCTCGGCAtacatcatcctgggcgacagccccgtgGGATGCGGAGGGTCCGGCGGCCGCTCATCTCGTGCGACATCAAGCTATACTCTAATAT	65	73	differentiation antigen	http://www.ncbi.nlm.nih.gov/protein/AAA51948.1	Myeloid cell surface antigen CD33	http://www.uniprot.org/uniprot/P20138	Homo sapiens	http://purl.obolibrary.org/obo/NCBITaxon_9606	Homo sapiens	http://purl.obolibrary.org/obo/NCBITaxon_9606	This peptide was designed by altering two amino acid residues within the native CD33 peptide (AIISGDSPV).	analog
74245	Linear peptide	YIISGDLPV	TACATCATCAGCGGCGACCTGCCCGTG	CAGGAGGGCTCGGCAtacatcatcagcggcgacctgcccgtgGGATGCGGAGGGTCCGGCGGCCGCTCATCTCGTGCGACATCAAGCTATACTCTAATAT	65	73	differentiation antigen	http://www.ncbi.nlm.nih.gov/protein/AAA51948.1	Myeloid cell surface antigen CD33	http://www.uniprot.org/uniprot/P20138	Homo sapiens	http://purl.obolibrary.org/obo/NCBITaxon_9606	Homo sapiens	http://purl.obolibrary.org/obo/NCBITaxon_9606	This peptide was designed by altering two amino acid residues within the native CD33 peptide (AIISGDSPV).	analog
74246	Linear peptide	YIISGDSPL	TACATCATCAGCGGCGACAGCCCCCTG	CAGGAGGGCTCGGCAtacatcatcagcggcgacagccccctgGGATGCGGAGGGTCCGGCGGCCGCTCATCTCGTGCGACATCAAGCTATACTCTAATAT	65	73	differentiation antigen	http://www.ncbi.nlm.nih.gov/protein/AAA51948.1	Myeloid cell surface antigen CD33	http://www.uniprot.org/uniprot/P20138	Homo sapiens	http://purl.obolibrary.org/obo/NCBITaxon_9606	Homo sapiens	http://purl.obolibrary.org/obo/NCBITaxon_9606	This peptide was designed by altering two amino acid residues within the native CD33 peptide (AIISGDSPV).	analog
74247	Linear peptide	YIISGDSWV	TACATCATCAGCGGCGACAGCTGGGTG	CAGGAGGGCTCGGCAtacatcatcagcggcgacagctgggtgGGATGCGGAGGGTCCGGCGGCCGCTCATCTCGTGCGACATCAAGCTATACTCTAATAT	65	73	differentiation antigen	http://www.ncbi.nlm.nih.gov/protein/AAA51948.1	Myeloid cell surface antigen CD33	http://www.uniprot.org/uniprot/P20138	Homo sapiens	http://purl.obolibrary.org/obo/NCBITaxon_9606	Homo sapiens	http://purl.obolibrary.org/obo/NCBITaxon_9606	This peptide was designed by altering two amino acid residues within the native CD33 peptide (AIISGDSPV).	analog
74248	Linear peptide	YIISGISPV	TACATCATCAGCGGCATCAGCCCCGTG	CAGGAGGGCTCGGCAtacatcatcagcggcatcagccccgtgGGATGCGGAGGGTCCGGCGGCCGCTCATCTCGTGCGACATCAAGCTATACTCTAATAT	65	73	differentiation antigen	http://www.ncbi.nlm.nih.gov/protein/AAA51948.1	Myeloid cell surface antigen CD33	http://www.uniprot.org/uniprot/P20138	Homo sapiens	http://purl.obolibrary.org/obo/NCBITaxon_9606	Homo sapiens	http://purl.obolibrary.org/obo/NCBITaxon_9606	This peptide was designed by altering two amino acid residues within the native CD33 peptide (AIISGDSPV).	analog
74288	Linear peptide	YILDLQPETT	TACATCCTGGACCTGCAGCCCGAGACCACC	CAGGAGGGCTCGGCAtacatcctggacctgcagcccgagaccaccGGATGCGGAGGGTCCGGCGGCCGCTCATCTCGTGCGACATCAAGCTATACTCTAA	11	20	Protein E7	http://www.ncbi.nlm.nih.gov/protein/P36831.1	Protein E7	http://www.uniprot.org/uniprot/P03129	Human papillomavirus type 52	http://purl.obolibrary.org/obo/NCBITaxon_10618	Alphapapillomavirus 9	http://purl.obolibrary.org/obo/NCBITaxon_337041
74289	Linear peptide	YILEETSVLL	TACATCCTGGAGGAGACCAGCGTGCTGCTG	CAGGAGGGCTCGGCAtacatcctggaggagaccagcgtgctgctgGGATGCGGAGGGTCCGGCGGCCGCTCATCTCGTGCGACATCAAGCTATACTCTAA	315	324	55 kDa immediate-early protein 1	http://www.ncbi.nlm.nih.gov/protein/AAR31504.1	55 kDa immediate-early protein 1	http://www.uniprot.org/uniprot/F5HCM1	Human betaherpesvirus 5	http://purl.obolibrary.org/obo/NCBITaxon_10359	Human betaherpesvirus 5	http://purl.obolibrary.org/obo/NCBITaxon_10359
74290	Linear peptide	YILEETSVLM	TACATCCTGGAGGAGACCAGCGTGCTGATG	CAGGAGGGCTCGGCAtacatcctggaggagaccagcgtgctgatgGGATGCGGAGGGTCCGGCGGCCGCTCATCTCGTGCGACATCAAGCTATACTCTAA			55 kDa immediate-early protein 1	https://ontology.iedb.org/ontology/ONTIE_0002369	55 kDa immediate-early protein 1	http://www.uniprot.org/uniprot/F5HCM1	Human betaherpesvirus 5	http://purl.obolibrary.org/obo/NCBITaxon_10359	Human betaherpesvirus 5	http://purl.obolibrary.org/obo/NCBITaxon_10359	This structure is a natural variant of the human CMV intermediate-early protein 1 residues 315-324.
74291	Linear peptide	YILEETSVM	TACATCCTGGAGGAGACCAGCGTGATG	CAGGAGGGCTCGGCAtacatcctggaggagaccagcgtgatgGGATGCGGAGGGTCCGGCGGCCGCTCATCTCGTGCGACATCAAGCTATACTCTAATAT	315	323	55 kDa immediate-early protein 1	http://www.ncbi.nlm.nih.gov/protein/AAR31419.1	55 kDa immediate-early protein 1	http://www.uniprot.org/uniprot/F5HCM1	Human betaherpesvirus 5	http://purl.obolibrary.org/obo/NCBITaxon_10359	Human betaherpesvirus 5	http://purl.obolibrary.org/obo/NCBITaxon_10359
74292	Linear peptide	YILEETSVML	TACATCCTGGAGGAGACCAGCGTGATGCTG	CAGGAGGGCTCGGCAtacatcctggaggagaccagcgtgatgctgGGATGCGGAGGGTCCGGCGGCCGCTCATCTCGTGCGACATCAAGCTATACTCTAA	315	324	55 kDa immediate-early protein 1	http://www.ncbi.nlm.nih.gov/protein/AAR31390.1	55 kDa immediate-early protein 1	http://www.uniprot.org/uniprot/F5HCM1	Human herpesvirus 5 strain Towne	http://purl.obolibrary.org/obo/NCBITaxon_10363	Human betaherpesvirus 5	http://purl.obolibrary.org/obo/NCBITaxon_10359
74293	Linear peptide	YILEETSVMM	TACATCCTGGAGGAGACCAGCGTGATGATG	CAGGAGGGCTCGGCAtacatcctggaggagaccagcgtgatgatgGGATGCGGAGGGTCCGGCGGCCGCTCATCTCGTGCGACATCAAGCTATACTCTAA			55 kDa immediate-early protein 1	https://ontology.iedb.org/ontology/ONTIE_0002369	55 kDa immediate-early protein 1	http://www.uniprot.org/uniprot/F5HCM1	Human betaherpesvirus 5	http://purl.obolibrary.org/obo/NCBITaxon_10359	Human betaherpesvirus 5	http://purl.obolibrary.org/obo/NCBITaxon_10359	This structure is a natural variant of the human CMV intermediate-early protein 1 residues 315-324.
74296	Linear peptide	YILGADPLRV	TACATCCTGGGCGCCGACCCCCTGAGGGTG	CAGGAGGGCTCGGCAtacatcctgggcgccgaccccctgagggtgGGATGCGGAGGGTCCGGCGGCCGCTCATCTCGTGCGACATCAAGCTATACTCTAA	354	363	55 kDa immediate-early protein 1	http://www.ncbi.nlm.nih.gov/protein/P13202.1	55 kDa immediate-early protein 1	http://www.uniprot.org/uniprot/F5HCM1	Human herpesvirus 5 strain AD169	http://purl.obolibrary.org/obo/NCBITaxon_10360	Human betaherpesvirus 5	http://purl.obolibrary.org/obo/NCBITaxon_10359
74388	Linear peptide	YITALNHLV	TACATCACCGCCCTGAACCACCTGGTG	CAGGAGGGCTCGGCAtacatcaccgccctgaaccacctggtgGGATGCGGAGGGTCCGGCGGCCGCTCATCTCGTGCGACATCAAGCTATACTCTAATAT	62	70	Scaffold protein D13	http://www.ncbi.nlm.nih.gov/protein/AAO89397.1	Scaffold protein D13	http://www.uniprot.org/uniprot/P68440	Vaccinia virus WR	http://purl.obolibrary.org/obo/NCBITaxon_10254	Vaccinia virus	http://purl.obolibrary.org/obo/NCBITaxon_10245
74407	Linear peptide	YIVRWEWVV	TACATCGTGAGGTGGGAGTGGGTGGTG	CAGGAGGGCTCGGCAtacatcgtgaggtgggagtgggtggtgGGATGCGGAGGGTCCGGCGGCCGCTCATCTCGTGCGACATCAAGCTATACTCTAATAT	717	725	Genome polyprotein	http://www.ncbi.nlm.nih.gov/protein/AAU89634.1	Genome polyprotein	http://www.uniprot.org/uniprot/P27958	Hepatitis C virus subtype 2a	http://purl.obolibrary.org/obo/NCBITaxon_31649	Hepatitis C virus	http://purl.obolibrary.org/obo/NCBITaxon_11103
74418	Linear peptide	YIYGIPLSL	TACATCTACGGCATCCCCCTGAGCCTG	CAGGAGGGCTCGGCAtacatctacggcatccccctgagcctgGGATGCGGAGGGTCCGGCGGCCGCTCATCTCGTGCGACATCAAGCTATACTCTAATAT	78	86	Kelch repeat and BTB domain-containing protein A55	http://www.ncbi.nlm.nih.gov/protein/AGK06648.1	Kelch repeat and BTB domain-containing protein A55	http://www.uniprot.org/uniprot/P24768	Vaccinia virus	http://purl.obolibrary.org/obo/NCBITaxon_10245	Vaccinia virus	http://purl.obolibrary.org/obo/NCBITaxon_10245
74545	Linear peptide	YLAAYALVGL	TACCTGGCCGCCTACGCCCTGGTGGGCCTG	CAGGAGGGCTCGGCAtacctggccgcctacgccctggtgggcctgGGATGCGGAGGGTCCGGCGGCCGCTCATCTCGTGCGACATCAAGCTATACTCTAA	3	12	Other Trypanosoma cruzi protein	http://www.ncbi.nlm.nih.gov/protein/CAA52943.1			Trypanosoma cruzi	http://purl.obolibrary.org/obo/NCBITaxon_5693	Trypanosoma cruzi	http://purl.obolibrary.org/obo/NCBITaxon_5693
74573	Linear peptide	YLAYRNQSL	TACCTGGCCTACAGGAACCAGAGCCTG	CAGGAGGGCTCGGCAtacctggcctacaggaaccagagcctgGGATGCGGAGGGTCCGGCGGCCGCTCATCTCGTGCGACATCAAGCTATACTCTAATAT	127	135	Der p 1	http://www.ncbi.nlm.nih.gov/protein/CAQ68250.1	Der p 1	http://www.uniprot.org/uniprot/P08176	Dermatophagoides pteronyssinus	http://purl.obolibrary.org/obo/NCBITaxon_6956	Dermatophagoides pteronyssinus	http://purl.obolibrary.org/obo/NCBITaxon_6956
74587	Linear peptide	YLCRHCLNLL	TACCTGTGCAGGCACTGCCTGAACCTGCTG	CAGGAGGGCTCGGCAtacctgtgcaggcactgcctgaacctgctgGGATGCGGAGGGTCCGGCGGCCGCTCATCTCGTGCGACATCAAGCTATACTCTAA	49	58	RING finger protein Z	http://www.ncbi.nlm.nih.gov/protein/P18541.3	RING finger protein Z	http://www.uniprot.org/uniprot/P18541	Lymphocytic choriomeningitis virus (strain Armstrong) (clone 53b)	https://ontology.iedb.org/ontology/ONTIE_0000397	Lymphocytic choriomeningitis mammarenavirus	http://purl.obolibrary.org/obo/NCBITaxon_11623
74603	Linear peptide	YLDGQLARL	TACCTGGACGGCCAGCTGGCCAGGCTG	CAGGAGGGCTCGGCAtacctggacggccagctggccaggctgGGATGCGGAGGGTCCGGCGGCCGCTCATCTCGTGCGACATCAAGCTATACTCTAATAT	462	470	Protein E6	http://www.ncbi.nlm.nih.gov/protein/P21047.1	Protein E6	http://www.uniprot.org/uniprot/P21607	Vaccinia virus Copenhagen	http://purl.obolibrary.org/obo/NCBITaxon_10249	Vaccinia virus	http://purl.obolibrary.org/obo/NCBITaxon_10245
74605	Linear peptide	YLDKVRATV	TACCTGGACAAGGTGAGGGCCACCGTG	CAGGAGGGCTCGGCAtacctggacaaggtgagggccaccgtgGGATGCGGAGGGTCCGGCGGCCGCTCATCTCGTGCGACATCAAGCTATACTCTAATAT	301	309	Circumsporozoite protein, putative	http://www.ncbi.nlm.nih.gov/protein/P08677.2	Circumsporozoite protein, putative	http://www.uniprot.org/uniprot/A5KB63	Plasmodium vivax strain Belem	http://purl.obolibrary.org/obo/NCBITaxon_31273	Plasmodium vivax	http://purl.obolibrary.org/obo/NCBITaxon_5855
74611	Linear peptide	YLDNLLPSTL	TACCTGGACAACCTGCTGCCCAGCACCCTG	CAGGAGGGCTCGGCAtacctggacaacctgctgcccagcaccctgGGATGCGGAGGGTCCGGCGGCCGCTCATCTCGTGCGACATCAAGCTATACTCTAA	155	164	Cell surface-binding protein	http://www.ncbi.nlm.nih.gov/protein/P20508.1	Cell surface-binding protein	http://www.uniprot.org/uniprot/P04195	Vaccinia virus Copenhagen	http://purl.obolibrary.org/obo/NCBITaxon_10249	Vaccinia virus	http://purl.obolibrary.org/obo/NCBITaxon_10245
74638	Linear peptide	YLEPGPVTA	TACCTGGAGCCCGGCCCCGTGACCGCC	CAGGAGGGCTCGGCAtacctggagcccggccccgtgaccgccGGATGCGGAGGGTCCGGCGGCCGCTCATCTCGTGCGACATCAAGCTATACTCTAATAT	280	288	Melanocyte protein PMEL	http://www.ncbi.nlm.nih.gov/protein/AAB31176.1	Melanocyte protein PMEL	http://www.uniprot.org/uniprot/P40967	Homo sapiens	http://purl.obolibrary.org/obo/NCBITaxon_9606	Homo sapiens	http://purl.obolibrary.org/obo/NCBITaxon_9606
74641	Linear peptide	YLEPGPVTV	TACCTGGAGCCCGGCCCCGTGACCGTG	CAGGAGGGCTCGGCAtacctggagcccggccccgtgaccgtgGGATGCGGAGGGTCCGGCGGCCGCTCATCTCGTGCGACATCAAGCTATACTCTAATAT	280	288	melanoma antigen gp100	http://www.ncbi.nlm.nih.gov/protein/AAB31176.1	Melanocyte protein PMEL	http://www.uniprot.org/uniprot/P40967	Homo sapiens	http://purl.obolibrary.org/obo/NCBITaxon_9606	Homo sapiens	http://purl.obolibrary.org/obo/NCBITaxon_9606	The epitope sequence was provided in cited reference Carreno et al. J Clin Invest 2013;123:3383 [PMID: 23867552].	analog
74643	Linear peptide	YLESFCEDV	TACCTGGAGAGCTTCTGCGAGGACGTG	CAGGAGGGCTCGGCAtacctggagagcttctgcgaggacgtgGGATGCGGAGGGTCCGGCGGCCGCTCATCTCGTGCGACATCAAGCTATACTCTAATAT	227	235	65 kDa phosphoprotein	http://www.ncbi.nlm.nih.gov/protein/P06725.2	65 kDa phosphoprotein	http://www.uniprot.org/uniprot/Q6SW59	Human herpesvirus 5 strain AD169	http://purl.obolibrary.org/obo/NCBITaxon_10360	Human betaherpesvirus 5	http://purl.obolibrary.org/obo/NCBITaxon_10359	The authors cite Swiss-Prot accession P06725 (GI: 130714) as the source of the epitope.
74652	Linear peptide	YLFLICHNL	TACCTGTTCCTGATCTGCCACAACCTG	CAGGAGGGCTCGGCAtacctgttcctgatctgccacaacctgGGATGCGGAGGGTCCGGCGGCCGCTCATCTCGTGCGACATCAAGCTATACTCTAATAT	102	110	Other Vaccinia virus protein	http://www.ncbi.nlm.nih.gov/protein/P20510.1			Vaccinia virus Copenhagen	http://purl.obolibrary.org/obo/NCBITaxon_10249	Vaccinia virus	http://purl.obolibrary.org/obo/NCBITaxon_10245
74699	Linear peptide	YLIDTTSREL	TACCTGATCGACACCACCAGCAGGGAGCTG	CAGGAGGGCTCGGCAtacctgatcgacaccaccagcagggagctgGGATGCGGAGGGTCCGGCGGCCGCTCATCTCGTGCGACATCAAGCTATACTCTAA	76	85	Major core protein 4a precursor	http://www.ncbi.nlm.nih.gov/protein/AAO89408.1	Major core protein 4a precursor	http://www.uniprot.org/uniprot/P16715	Vaccinia virus WR	http://purl.obolibrary.org/obo/NCBITaxon_10254	Vaccinia virus	http://purl.obolibrary.org/obo/NCBITaxon_10245
74703	Linear peptide	YLIIGILTL	TACCTGATCATCGGCATCCTGACCCTG	CAGGAGGGCTCGGCAtacctgatcatcggcatcctgaccctgGGATGCGGAGGGTCCGGCGGCCGCTCATCTCGTGCGACATCAAGCTATACTCTAATAT	2242	2250	Genome polyprotein	http://www.ncbi.nlm.nih.gov/protein/P03314.1	Genome polyprotein	http://www.uniprot.org/uniprot/P03314	Yellow fever virus 17D	http://purl.obolibrary.org/obo/NCBITaxon_11090	Yellow fever virus	http://purl.obolibrary.org/obo/NCBITaxon_11089
74704	Linear peptide	YLIKLIEPV	TACCTGATCAAGCTGATCGAGCCCGTG	CAGGAGGGCTCGGCAtacctgatcaagctgatcgagcccgtgGGATGCGGAGGGTCCGGCGGCCGCTCATCTCGTGCGACATCAAGCTATACTCTAATAT	313	321	mRNA-capping enzyme catalytic subunit	http://www.ncbi.nlm.nih.gov/protein/P04298.1	mRNA-capping enzyme catalytic subunit	http://www.uniprot.org/uniprot/P04298	Vaccinia virus	http://purl.obolibrary.org/obo/NCBITaxon_10245	Vaccinia virus	http://purl.obolibrary.org/obo/NCBITaxon_10245
74719	Linear peptide	YLISGDSPV	TACCTGATCAGCGGCGACAGCCCCGTG	CAGGAGGGCTCGGCAtacctgatcagcggcgacagccccgtgGGATGCGGAGGGTCCGGCGGCCGCTCATCTCGTGCGACATCAAGCTATACTCTAATAT	65	73	differentiation antigen	http://www.ncbi.nlm.nih.gov/protein/AAA51948.1	Myeloid cell surface antigen CD33	http://www.uniprot.org/uniprot/P20138	Homo sapiens	http://purl.obolibrary.org/obo/NCBITaxon_9606	Homo sapiens	http://purl.obolibrary.org/obo/NCBITaxon_9606	This peptide was designed by altering two amino acid residues within the native CD33 peptide (AIISGDSPV).	analog
74743	Linear peptide	YLKKIKNSL	TACCTGAAGAAGATCAAGAACAGCCTG	CAGGAGGGCTCGGCAtacctgaagaagatcaagaacagcctgGGATGCGGAGGGTCCGGCGGCCGCTCATCTCGTGCGACATCAAGCTATACTCTAATAT	44	52	Circumsporozoite (CS) protein	http://www.ncbi.nlm.nih.gov/protein/ABF66086.1	Circumsporozoite (CS) protein	http://www.uniprot.org/uniprot/Q7K740	Plasmodium falciparum 7G8	http://purl.obolibrary.org/obo/NCBITaxon_57266	Plasmodium falciparum	http://purl.obolibrary.org/obo/NCBITaxon_5833
74744	Linear peptide	YLKKIQNSL	TACCTGAAGAAGATCCAGAACAGCCTG	CAGGAGGGCTCGGCAtacctgaagaagatccagaacagcctgGGATGCGGAGGGTCCGGCGGCCGCTCATCTCGTGCGACATCAAGCTATACTCTAATAT	364	372	Circumsporozoite (CS) protein	http://www.ncbi.nlm.nih.gov/protein/P08307.1	Circumsporozoite (CS) protein	http://www.uniprot.org/uniprot/Q7K740	Plasmodium falciparum isolate WELLCOME	http://purl.obolibrary.org/obo/NCBITaxon_5848	Plasmodium falciparum	http://purl.obolibrary.org/obo/NCBITaxon_5833
74768	Linear peptide	YLLDGLRAQ	TACCTGCTGGACGGCCTGAGGGCCCAG	CAGGAGGGCTCGGCAtacctgctggacggcctgagggcccagGGATGCGGAGGGTCCGGCGGCCGCTCATCTCGTGCGACATCAAGCTATACTCTAATAT	77	85	Diacylglycerol acyltransferase/mycolyltransferase Ag85B	http://www.ncbi.nlm.nih.gov/protein/P31952	Diacylglycerol acyltransferase/mycolyltransferase Ag85B	http://www.uniprot.org/uniprot/P9WQP1	Mycobacterium tuberculosis	http://purl.obolibrary.org/obo/NCBITaxon_1773	Mycobacterium tuberculosis	http://purl.obolibrary.org/obo/NCBITaxon_1773
74773	Linear peptide	YLLEKSRAI	TACCTGCTGGAGAAGAGCAGGGCCATC	CAGGAGGGCTCGGCAtacctgctggagaagagcagggccatcGGATGCGGAGGGTCCGGCGGCCGCTCATCTCGTGCGACATCAAGCTATACTCTAATAT	264	272	Myosin-11	http://www.ncbi.nlm.nih.gov/protein/P35749.3	Myosin-11	http://www.uniprot.org/uniprot/P35749	Homo sapiens	http://purl.obolibrary.org/obo/NCBITaxon_9606	Homo sapiens	http://purl.obolibrary.org/obo/NCBITaxon_9606
74774	Linear peptide	YLLEMLWRL	TACCTGCTGGAGATGCTGTGGAGGCTG	CAGGAGGGCTCGGCAtacctgctggagatgctgtggaggctgGGATGCGGAGGGTCCGGCGGCCGCTCATCTCGTGCGACATCAAGCTATACTCTAATAT	125	133	Latent membrane protein 1	http://www.ncbi.nlm.nih.gov/protein/YP_401722.1	Latent membrane protein 1	http://www.uniprot.org/uniprot/P03230	Human herpesvirus 4 type 1	http://purl.obolibrary.org/obo/NCBITaxon_36352	Human gammaherpesvirus 4	http://purl.obolibrary.org/obo/NCBITaxon_10376
74787	Linear peptide	YLLKPVQRI	TACCTGCTGAAGCCCGTGCAGAGGATC	CAGGAGGGCTCGGCAtacctgctgaagcccgtgcagaggatcGGATGCGGAGGGTCCGGCGGCCGCTCATCTCGTGCGACATCAAGCTATACTCTAATAT	627	635	Proto-oncogene DBL	http://www.ncbi.nlm.nih.gov/protein/P10911.3	Proto-oncogene DBL	http://www.uniprot.org/uniprot/P10911	Homo sapiens	http://purl.obolibrary.org/obo/NCBITaxon_9606	Homo sapiens	http://purl.obolibrary.org/obo/NCBITaxon_9606
74794	Linear peptide	YLLPAIVHI	TACCTGCTGCCCGCCATCGTGCACATC	CAGGAGGGCTCGGCAtacctgctgcccgccatcgtgcacatcGGATGCGGAGGGTCCGGCGGCCGCTCATCTCGTGCGACATCAAGCTATACTCTAATAT	148	156	Probable ATP-dependent RNA helicase DDX5 (UniProt:P17844)	http://www.ncbi.nlm.nih.gov/protein/P17844.1	Probable ATP-dependent RNA helicase DDX5	http://www.uniprot.org/uniprot/P17844	Homo sapiens	http://purl.obolibrary.org/obo/NCBITaxon_9606	Homo sapiens	http://purl.obolibrary.org/obo/NCBITaxon_9606
74798	Linear peptide	YLLPRRGPRL	TACCTGCTGCCCAGGAGGGGCCCCAGGCTG	CAGGAGGGCTCGGCAtacctgctgcccaggaggggccccaggctgGGATGCGGAGGGTCCGGCGGCCGCTCATCTCGTGCGACATCAAGCTATACTCTAA	35	44	Genome polyprotein	http://www.ncbi.nlm.nih.gov/protein/BAB18806.1	Genome polyprotein	http://www.uniprot.org/uniprot/P27958	Hepatitis C virus subtype 1a	http://purl.obolibrary.org/obo/NCBITaxon_31646	Hepatitis C virus	http://purl.obolibrary.org/obo/NCBITaxon_11103	Imported from the TopBank database.
74800	Linear peptide	YLLPSRGPKL	TACCTGCTGCCCAGCAGGGGCCCCAAGCTG	CAGGAGGGCTCGGCAtacctgctgcccagcaggggccccaagctgGGATGCGGAGGGTCCGGCGGCCGCTCATCTCGTGCGACATCAAGCTATACTCTAA			Genome polyprotein	https://ontology.iedb.org/ontology/ONTIE_0002561	Genome polyprotein	http://www.uniprot.org/uniprot/P27958	Hepatitis C virus subtype 2b	http://purl.obolibrary.org/obo/NCBITaxon_31650	Hepatitis C virus	http://purl.obolibrary.org/obo/NCBITaxon_11103
74841	Linear peptide	YLNKIQNSL	TACCTGAACAAGATCCAGAACAGCCTG	CAGGAGGGCTCGGCAtacctgaacaagatccagaacagcctgGGATGCGGAGGGTCCGGCGGCCGCTCATCTCGTGCGACATCAAGCTATACTCTAATAT	319	327	Circumsporozoite (CS) protein	http://www.ncbi.nlm.nih.gov/protein/P19597.2	Circumsporozoite (CS) protein	http://www.uniprot.org/uniprot/Q7K740	Plasmodium falciparum 3D7	http://purl.obolibrary.org/obo/NCBITaxon_36329	Plasmodium falciparum	http://purl.obolibrary.org/obo/NCBITaxon_5833
74857	Linear peptide	YLPEVISTI	TACCTGCCCGAGGTGATCAGCACCATC	CAGGAGGGCTCGGCAtacctgcccgaggtgatcagcaccatcGGATGCGGAGGGTCCGGCGGCCGCTCATCTCGTGCGACATCAAGCTATACTCTAATAT	250	258	Assembly protein G7	http://www.ncbi.nlm.nih.gov/protein/YP_232967.1	Assembly protein G7	http://www.uniprot.org/uniprot/P68716	Vaccinia virus	http://purl.obolibrary.org/obo/NCBITaxon_10245	Vaccinia virus	http://purl.obolibrary.org/obo/NCBITaxon_10245
74865	Linear peptide	YLPLSVFII	TACCTGCCCCTGAGCGTGTTCATCATC	CAGGAGGGCTCGGCAtacctgcccctgagcgtgttcatcatcGGATGCGGAGGGTCCGGCGGCCGCTCATCTCGTGCGACATCAAGCTATACTCTAATAT	153	161	Protein A37	http://www.ncbi.nlm.nih.gov/protein/P21060.1	Protein A37	http://www.uniprot.org/uniprot/P24762	Vaccinia virus Copenhagen	http://purl.obolibrary.org/obo/NCBITaxon_10249	Vaccinia virus	http://purl.obolibrary.org/obo/NCBITaxon_10245
74886	Linear peptide	YLQQNWWTL	TACCTGCAGCAGAACTGGTGGACCCTG	CAGGAGGGCTCGGCAtacctgcagcagaactggtggaccctgGGATGCGGAGGGTCCGGCGGCCGCTCATCTCGTGCGACATCAAGCTATACTCTAATAT	159	167	Latent membrane protein 1	http://www.ncbi.nlm.nih.gov/protein/ABM45855.1	Latent membrane protein 1	http://www.uniprot.org/uniprot/P03230	Human gammaherpesvirus 4	http://purl.obolibrary.org/obo/NCBITaxon_10376	Human gammaherpesvirus 4	http://purl.obolibrary.org/obo/NCBITaxon_10376
74906	Linear peptide	YLSAKITTL	TACCTGAGCGCCAAGATCACCACCCTG	CAGGAGGGCTCGGCAtacctgagcgccaagatcaccaccctgGGATGCGGAGGGTCCGGCGGCCGCTCATCTCGTGCGACATCAAGCTATACTCTAATAT	66	74	Other Vaccinia virus protein	http://www.ncbi.nlm.nih.gov/protein/P20568.1			Vaccinia virus Copenhagen	http://purl.obolibrary.org/obo/NCBITaxon_10249	Vaccinia virus	http://purl.obolibrary.org/obo/NCBITaxon_10245
74915	Linear peptide	YLSGANLNL	TACCTGAGCGGCGCCAACCTGAACCTG	CAGGAGGGCTCGGCAtacctgagcggcgccaacctgaacctgGGATGCGGAGGGTCCGGCGGCCGCTCATCTCGTGCGACATCAAGCTATACTCTAATAT	605	613	Carcinoembryonic antigen-related cell adhesion molecule 5	http://www.ncbi.nlm.nih.gov/protein/P06731.2	Carcinoembryonic antigen-related cell adhesion molecule 5	http://www.uniprot.org/uniprot/P06731	Homo sapiens	http://purl.obolibrary.org/obo/NCBITaxon_9606	Homo sapiens	http://purl.obolibrary.org/obo/NCBITaxon_9606
74961	Linear peptide	YLVAYQATV	TACCTGGTGGCCTACCAGGCCACCGTG	CAGGAGGGCTCGGCAtacctggtggcctaccaggccaccgtgGGATGCGGAGGGTCCGGCGGCCGCTCATCTCGTGCGACATCAAGCTATACTCTAATAT	1585	1593	Genome polyprotein	http://www.ncbi.nlm.nih.gov/protein/P26663.3	Genome polyprotein	http://www.uniprot.org/uniprot/P27958	Hepatitis C virus	http://purl.obolibrary.org/obo/NCBITaxon_11103	Hepatitis C virus	http://purl.obolibrary.org/obo/NCBITaxon_11103	Imported from the TopBank database.
74978	Linear peptide	YLVSIFLHL	TACCTGGTGAGCATCTTCCTGCACCTG	CAGGAGGGCTCGGCAtacctggtgagcatcttcctgcacctgGGATGCGGAGGGTCCGGCGGCCGCTCATCTCGTGCGACATCAAGCTATACTCTAATAT	447	455	Pre-glycoprotein polyprotein GP complex	http://www.ncbi.nlm.nih.gov/protein/P09991.1	Pre-glycoprotein polyprotein GP complex	http://www.uniprot.org/uniprot/P09991	Lymphocytic choriomeningitis virus (strain Armstrong) (clone 53b)	https://ontology.iedb.org/ontology/ONTIE_0000397	Lymphocytic choriomeningitis mammarenavirus	http://purl.obolibrary.org/obo/NCBITaxon_11623
74988	Linear peptide	YLVTRHADV	TACCTGGTGACCAGGCACGCCGACGTG	CAGGAGGGCTCGGCAtacctggtgaccaggcacgccgacgtgGGATGCGGAGGGTCCGGCGGCCGCTCATCTCGTGCGACATCAAGCTATACTCTAATAT	1131	1139	Genome polyprotein	http://www.ncbi.nlm.nih.gov/protein/BAB18806.1	Genome polyprotein	http://www.uniprot.org/uniprot/P27958	Hepatitis C virus	http://purl.obolibrary.org/obo/NCBITaxon_11103	Hepatitis C virus	http://purl.obolibrary.org/obo/NCBITaxon_11103
75024	Linear peptide	YLYQLSPPI	TACCTGTACCAGCTGAGCCCCCCCATC	CAGGAGGGCTCGGCAtacctgtaccagctgagcccccccatcGGATGCGGAGGGTCCGGCGGCCGCTCATCTCGTGCGACATCAAGCTATACTCTAATAT	155	163	Protein Tax-1	http://www.ncbi.nlm.nih.gov/protein/P03409.2	Protein Tax-1	http://www.uniprot.org/uniprot/P14079	Human T-lymphotropic virus 1	http://purl.obolibrary.org/obo/NCBITaxon_11908	Primate T-lymphotropic virus 1	http://purl.obolibrary.org/obo/NCBITaxon_194440	The epitope sequence was cited in Yashiki et al. AIDS Res Hum Retroviruses. 2001 Jul 20;17(11):1047-61[PMID:11485622].
75028	Linear peptide	YLYTEYFLFL	TACCTGTACACCGAGTACTTCCTGTTCCTG	CAGGAGGGCTCGGCAtacctgtacaccgagtacttcctgttcctgGGATGCGGAGGGTCCGGCGGCCGCTCATCTCGTGCGACATCAAGCTATACTCTAA	177	186	A-type inclusion protein A25	http://www.ncbi.nlm.nih.gov/protein/AAO89427.1	A-type inclusion protein A25	http://www.uniprot.org/uniprot/P24759	Vaccinia virus	http://purl.obolibrary.org/obo/NCBITaxon_10245	Vaccinia virus	http://purl.obolibrary.org/obo/NCBITaxon_10245
75043	Linear peptide	YMDGTMSQV	TACATGGACGGCACCATGAGCCAGGTG	CAGGAGGGCTCGGCAtacatggacggcaccatgagccaggtgGGATGCGGAGGGTCCGGCGGCCGCTCATCTCGTGCGACATCAAGCTATACTCTAATAT	369	377	Tyrosinase precursor	http://www.ncbi.nlm.nih.gov/protein/P14679.3	Tyrosinase	http://www.uniprot.org/uniprot/P14679	Homo sapiens	http://purl.obolibrary.org/obo/NCBITaxon_9606	Homo sapiens	http://purl.obolibrary.org/obo/NCBITaxon_9606		analog
75074	Linear peptide	YMLDLQPET	TACATGCTGGACCTGCAGCCCGAGACC	CAGGAGGGCTCGGCAtacatgctggacctgcagcccgagaccGGATGCGGAGGGTCCGGCGGCCGCTCATCTCGTGCGACATCAAGCTATACTCTAATAT	11	19	Protein E7	http://www.ncbi.nlm.nih.gov/protein/ABL96585.1	Protein E7	http://www.uniprot.org/uniprot/P03129	Human papillomavirus type 16	http://purl.obolibrary.org/obo/NCBITaxon_333760	Alphapapillomavirus 9	http://purl.obolibrary.org/obo/NCBITaxon_337041
75075	Linear peptide	YMLDLQPETT	TACATGCTGGACCTGCAGCCCGAGACCACC	CAGGAGGGCTCGGCAtacatgctggacctgcagcccgagaccaccGGATGCGGAGGGTCCGGCGGCCGCTCATCTCGTGCGACATCAAGCTATACTCTAA	11	20	Protein E7	http://www.ncbi.nlm.nih.gov/protein/P03129.1	Protein E7	http://www.uniprot.org/uniprot/P03129	Human papillomavirus type 16	http://purl.obolibrary.org/obo/NCBITaxon_333760	Alphapapillomavirus 9	http://purl.obolibrary.org/obo/NCBITaxon_337041
75092	Linear peptide	YMNGTMSQV	TACATGAACGGCACCATGAGCCAGGTG	CAGGAGGGCTCGGCAtacatgaacggcaccatgagccaggtgGGATGCGGAGGGTCCGGCGGCCGCTCATCTCGTGCGACATCAAGCTATACTCTAATAT	369	377	Tyrosinase	http://www.ncbi.nlm.nih.gov/protein/AHZ44440.1	Tyrosinase	http://www.uniprot.org/uniprot/P14679	Homo sapiens	http://purl.obolibrary.org/obo/NCBITaxon_9606	Homo sapiens	http://purl.obolibrary.org/obo/NCBITaxon_9606
75718	Linear peptide	YSEHPTFTSQY	TACAGCGAGCACCCCACCTTCACCAGCCAGTAC	CAGGAGGGCTCGGCAtacagcgagcaccccaccttcaccagccagtacGGATGCGGAGGGTCCGGCGGCCGCTCATCTCGTGCGACATCAAGCTATACTC	363	373	65 kDa phosphoprotein	http://www.ncbi.nlm.nih.gov/protein/YP_002608275.1	65 kDa phosphoprotein	http://www.uniprot.org/uniprot/Q6SW59	Human betaherpesvirus 5	http://purl.obolibrary.org/obo/NCBITaxon_10359	Human betaherpesvirus 5	http://purl.obolibrary.org/obo/NCBITaxon_10359
76121	Linear peptide	YTMDGEYRL	TACACCATGGACGGCGAGTACAGGCTG	CAGGAGGGCTCGGCAtacaccatggacggcgagtacaggctgGGATGCGGAGGGTCCGGCGGCCGCTCATCTCGTGCGACATCAAGCTATACTCTAATAT	518	526	Genome polyprotein	http://www.ncbi.nlm.nih.gov/protein/YP_001527884.1	Genome polyprotein	http://www.uniprot.org/uniprot/P14335	West Nile virus NY-99	https://ontology.iedb.org/ontology/ONTIE_0000839	West Nile virus	http://purl.obolibrary.org/obo/NCBITaxon_11082	The author provided GenBank identifier was GI:11597240.
76277	Linear peptide	YVGDLCGCV	TACGTGGGCGACCTGTGCGGCTGCGTG	CAGGAGGGCTCGGCAtacgtgggcgacctgtgcggctgcgtgGGATGCGGAGGGTCCGGCGGCCGCTCATCTCGTGCGACATCAAGCTATACTCTAATAT			Genome polyprotein	https://ontology.iedb.org/ontology/ONTIE_0002561	Genome polyprotein	http://www.uniprot.org/uniprot/P27958	Hepatitis C virus	http://purl.obolibrary.org/obo/NCBITaxon_11103	Hepatitis C virus	http://purl.obolibrary.org/obo/NCBITaxon_11103
76333	Linear peptide	YVLDHLIVV	TACGTGCTGGACCACCTGATCGTGGTG	CAGGAGGGCTCGGCAtacgtgctggaccacctgatcgtggtgGGATGCGGAGGGTCCGGCGGCCGCTCATCTCGTGCGACATCAAGCTATACTCTAATAT	109	117	Replication and transcription activator	http://www.ncbi.nlm.nih.gov/protein/ABB89247.1	Replication and transcription activator	http://www.uniprot.org/uniprot/P03209	Human gammaherpesvirus 4	http://purl.obolibrary.org/obo/NCBITaxon_10376	Human gammaherpesvirus 4	http://purl.obolibrary.org/obo/NCBITaxon_10376
76334	Linear peptide	YVLDLQPEAT	TACGTGCTGGACCTGCAGCCCGAGGCCACC	CAGGAGGGCTCGGCAtacgtgctggacctgcagcccgaggccaccGGATGCGGAGGGTCCGGCGGCCGCTCATCTCGTGCGACATCAAGCTATACTCTAA	11	20	Protein E7	http://www.ncbi.nlm.nih.gov/protein/P17387.1	Protein E7	http://www.uniprot.org/uniprot/P03129	Human papillomavirus type 31	http://purl.obolibrary.org/obo/NCBITaxon_10585	Alphapapillomavirus 9	http://purl.obolibrary.org/obo/NCBITaxon_337041
76336	Linear peptide	YVLEETSVLL	TACGTGCTGGAGGAGACCAGCGTGCTGCTG	CAGGAGGGCTCGGCAtacgtgctggaggagaccagcgtgctgctgGGATGCGGAGGGTCCGGCGGCCGCTCATCTCGTGCGACATCAAGCTATACTCTAA			55 kDa immediate-early protein 1	https://ontology.iedb.org/ontology/ONTIE_0002369	55 kDa immediate-early protein 1	http://www.uniprot.org/uniprot/F5HCM1	Human betaherpesvirus 5	http://purl.obolibrary.org/obo/NCBITaxon_10359	Human betaherpesvirus 5	http://purl.obolibrary.org/obo/NCBITaxon_10359	This structure is a natural variant of the human CMV intermediate-early protein 1 residues 315-324.
76337	Linear peptide	YVLEETSVM	TACGTGCTGGAGGAGACCAGCGTGATG	CAGGAGGGCTCGGCAtacgtgctggaggagaccagcgtgatgGGATGCGGAGGGTCCGGCGGCCGCTCATCTCGTGCGACATCAAGCTATACTCTAATAT	315	323	55 kDa immediate-early protein 1	http://www.ncbi.nlm.nih.gov/protein/YP_002608299.1	55 kDa immediate-early protein 1	http://www.uniprot.org/uniprot/F5HCM1	Human betaherpesvirus 5	http://purl.obolibrary.org/obo/NCBITaxon_10359	Human betaherpesvirus 5	http://purl.obolibrary.org/obo/NCBITaxon_10359
76338	Linear peptide	YVLEETSVML	TACGTGCTGGAGGAGACCAGCGTGATGCTG	CAGGAGGGCTCGGCAtacgtgctggaggagaccagcgtgatgctgGGATGCGGAGGGTCCGGCGGCCGCTCATCTCGTGCGACATCAAGCTATACTCTAA	315	324	55 kDa immediate-early protein 1	http://www.ncbi.nlm.nih.gov/protein/P13202.1	55 kDa immediate-early protein 1	http://www.uniprot.org/uniprot/F5HCM1	Human herpesvirus 5 strain AD169	http://purl.obolibrary.org/obo/NCBITaxon_10360	Human betaherpesvirus 5	http://purl.obolibrary.org/obo/NCBITaxon_10359
76342	Linear peptide	YVLFEVFDVV	TACGTGCTGTTCGAGGTGTTCGACGTGGTG	CAGGAGGGCTCGGCAtacgtgctgttcgaggtgttcgacgtggtgGGATGCGGAGGGTCCGGCGGCCGCTCATCTCGTGCGACATCAAGCTATACTCTAA	917	926	Hexon protein	http://www.ncbi.nlm.nih.gov/protein/P04133.3	Hexon protein	http://www.uniprot.org/uniprot/P03277	Human adenovirus 5	http://purl.obolibrary.org/obo/NCBITaxon_28285	Human mastadenovirus C	http://purl.obolibrary.org/obo/NCBITaxon_129951
76361	Linear peptide	YVNAILYQI	TACGTGAACGCCATCCTGTACCAGATC	CAGGAGGGCTCGGCAtacgtgaacgccatcctgtaccagatcGGATGCGGAGGGTCCGGCGGCCGCTCATCTCGTGCGACATCAAGCTATACTCTAATAT	93	101	Protein N2	http://www.ncbi.nlm.nih.gov/protein/P14357.1	Protein N2	http://www.uniprot.org/uniprot/P14357	Vaccinia virus	http://purl.obolibrary.org/obo/NCBITaxon_10245	Vaccinia virus	http://purl.obolibrary.org/obo/NCBITaxon_10245
77774	Linear peptide	CLGGLLTMVA	TGCCTGGGCGGCCTGCTGACCATGGTGGCC	CAGGAGGGCTCGGCAtgcctgggcggcctgctgaccatggtggccGGATGCGGAGGGTCCGGCGGCCGCTCATCTCGTGCGACATCAAGCTATACTCTAA	294	303	Latent membrane protein 2	http://www.ncbi.nlm.nih.gov/protein/Q69135	Latent membrane protein 2	http://www.uniprot.org/uniprot/P13285	Human gammaherpesvirus 4	http://purl.obolibrary.org/obo/NCBITaxon_10376	Human gammaherpesvirus 4	http://purl.obolibrary.org/obo/NCBITaxon_10376
77775	Linear peptide	CLGGLLTMVAG	TGCCTGGGCGGCCTGCTGACCATGGTGGCCGGC	CAGGAGGGCTCGGCAtgcctgggcggcctgctgaccatggtggccggcGGATGCGGAGGGTCCGGCGGCCGCTCATCTCGTGCGACATCAAGCTATACTC	294	304	Latent membrane protein 2	http://www.ncbi.nlm.nih.gov/protein/Q69135	Latent membrane protein 2	http://www.uniprot.org/uniprot/P13285	Human gammaherpesvirus 4	http://purl.obolibrary.org/obo/NCBITaxon_10376	Human gammaherpesvirus 4	http://purl.obolibrary.org/obo/NCBITaxon_10376
78346	Linear peptide	AFLGERVTL	GCCTTCCTGGGCGAGAGGGTGACCCTG	CAGGAGGGCTCGGCAgccttcctgggcgagagggtgaccctgGGATGCGGAGGGTCCGGCGGCCGCTCATCTCGTGCGACATCAAGCTATACTCTAATAT	23	31	Secreted protein BARF1	http://www.ncbi.nlm.nih.gov/protein/CAD53469.1	Secreted protein BARF1	http://www.uniprot.org/uniprot/P03228	Human gammaherpesvirus 4	http://purl.obolibrary.org/obo/NCBITaxon_10376	Human gammaherpesvirus 4	http://purl.obolibrary.org/obo/NCBITaxon_10376
78382	Linear peptide	FLGERVTLT	TTCCTGGGCGAGAGGGTGACCCTGACC	CAGGAGGGCTCGGCAttcctgggcgagagggtgaccctgaccGGATGCGGAGGGTCCGGCGGCCGCTCATCTCGTGCGACATCAAGCTATACTCTAATAT	24	32	Secreted protein BARF1	http://www.ncbi.nlm.nih.gov/protein/CAD53469.1	Secreted protein BARF1	http://www.uniprot.org/uniprot/P03228	Human gammaherpesvirus 4	http://purl.obolibrary.org/obo/NCBITaxon_10376	Human gammaherpesvirus 4	http://purl.obolibrary.org/obo/NCBITaxon_10376
78432	Linear peptide	KLGPGEEQV	AAGCTGGGCCCCGGCGAGGAGCAGGTG	CAGGAGGGCTCGGCAaagctgggccccggcgaggagcaggtgGGATGCGGAGGGTCCGGCGGCCGCTCATCTCGTGCGACATCAAGCTATACTCTAATAT	50	58	Secreted protein BARF1	http://www.ncbi.nlm.nih.gov/protein/CAD53469.1	Secreted protein BARF1	http://www.uniprot.org/uniprot/P03228	Human gammaherpesvirus 4	http://purl.obolibrary.org/obo/NCBITaxon_10376	Human gammaherpesvirus 4	http://purl.obolibrary.org/obo/NCBITaxon_10376
78501	Linear peptide	RFIAQLLLL	AGGTTCATCGCCCAGCTGCTGCTGCTG	CAGGAGGGCTCGGCAaggttcatcgcccagctgctgctgctgGGATGCGGAGGGTCCGGCGGCCGCTCATCTCGTGCGACATCAAGCTATACTCTAATAT	3	11	Secreted protein BARF1	http://www.ncbi.nlm.nih.gov/protein/CAD53469.1	Secreted protein BARF1	http://www.uniprot.org/uniprot/P03228	Human gammaherpesvirus 4	http://purl.obolibrary.org/obo/NCBITaxon_10376	Human gammaherpesvirus 4	http://purl.obolibrary.org/obo/NCBITaxon_10376
78534	Linear peptide	TLTSYWRRV	ACCCTGACCAGCTACTGGAGGAGGGTG	CAGGAGGGCTCGGCAaccctgaccagctactggaggagggtgGGATGCGGAGGGTCCGGCGGCCGCTCATCTCGTGCGACATCAAGCTATACTCTAATAT	30	38	Secreted protein BARF1	http://www.ncbi.nlm.nih.gov/protein/CAD53469.1	Secreted protein BARF1	http://www.uniprot.org/uniprot/P03228	Human gammaherpesvirus 4	http://purl.obolibrary.org/obo/NCBITaxon_10376	Human gammaherpesvirus 4	http://purl.obolibrary.org/obo/NCBITaxon_10376
78969	Linear peptide	FAYDGKDYI	TTCGCCTACGACGGCAAGGACTACATC	CAGGAGGGCTCGGCAttcgcctacgacggcaaggactacatcGGATGCGGAGGGTCCGGCGGCCGCTCATCTCGTGCGACATCAAGCTATACTCTAATAT	12	20	HLA class I histocompatibility antigen, Cw-7 alpha chain	http://www.ncbi.nlm.nih.gov/protein/AGZ87801.1	HLA class I histocompatibility antigen, Cw-7 alpha chain	http://www.uniprot.org/uniprot/P10321	Homo sapiens	http://purl.obolibrary.org/obo/NCBITaxon_9606	Homo sapiens	http://purl.obolibrary.org/obo/NCBITaxon_9606	HLA-A*02:01
78970	Linear peptide	FAYDGKDYL	TTCGCCTACGACGGCAAGGACTACCTG	CAGGAGGGCTCGGCAttcgcctacgacggcaaggactacctgGGATGCGGAGGGTCCGGCGGCCGCTCATCTCGTGCGACATCAAGCTATACTCTAATAT	137	145	HLA class I histocompatibility antigen, alpha chain E	http://www.ncbi.nlm.nih.gov/protein/P13747.3	HLA class I histocompatibility antigen, alpha chain E	http://www.uniprot.org/uniprot/P13747	Homo sapiens	http://purl.obolibrary.org/obo/NCBITaxon_9606	Homo sapiens	http://purl.obolibrary.org/obo/NCBITaxon_9606
78975	Linear peptide	FVLPELPSV	TTCGTGCTGCCCGAGCTGCCCAGCGTG	CAGGAGGGCTCGGCAttcgtgctgcccgagctgcccagcgtgGGATGCGGAGGGTCCGGCGGCCGCTCATCTCGTGCGACATCAAGCTATACTCTAATAT	290	298	IST1 homolog	http://www.ncbi.nlm.nih.gov/protein/EAW59208.1	IST1 homolog	http://www.uniprot.org/uniprot/P53990	Homo sapiens	http://purl.obolibrary.org/obo/NCBITaxon_9606	Homo sapiens	http://purl.obolibrary.org/obo/NCBITaxon_9606
79004	Linear peptide	KQLDDLKVEL	AAGCAGCTGGACGACCTGAAGGTGGAGCTG	CAGGAGGGCTCGGCAaagcagctggacgacctgaaggtggagctgGGATGCGGAGGGTCCGGCGGCCGCTCATCTCGTGCGACATCAAGCTATACTCTAA	19	28	60S ribosomal protein L35	http://www.ncbi.nlm.nih.gov/protein/P42766.2	60S ribosomal protein L35	http://www.uniprot.org/uniprot/P42766	Homo sapiens	http://purl.obolibrary.org/obo/NCBITaxon_9606	Homo sapiens	http://purl.obolibrary.org/obo/NCBITaxon_9606
79124	Linear peptide	YGILGFVFTL	TACGGCATCCTGGGCTTCGTGTTCACCCTG	CAGGAGGGCTCGGCAtacggcatcctgggcttcgtgttcaccctgGGATGCGGAGGGTCCGGCGGCCGCTCATCTCGTGCGACATCAAGCTATACTCTAA											This structure is an analog of the naturally occurring Influenza A virus matrix protein M1 58-66.
81067	Linear peptide	DIRTLLPILL	GACATCAGGACCCTGCTGCCCATCCTGCTG	CAGGAGGGCTCGGCAgacatcaggaccctgctgcccatcctgctgGGATGCGGAGGGTCCGGCGGCCGCTCATCTCGTGCGACATCAAGCTATACTCTAA	99	108	Protein G3	http://www.ncbi.nlm.nih.gov/protein/AAO89358.1	Protein G3	http://www.uniprot.org/uniprot/P68458	Vaccinia virus WR	http://purl.obolibrary.org/obo/NCBITaxon_10254	Vaccinia virus	http://purl.obolibrary.org/obo/NCBITaxon_10245
81563	Linear peptide	EINNELELV	GAGATCAACAACGAGCTGGAGCTGGTG	CAGGAGGGCTCGGCAgagatcaacaacgagctggagctggtgGGATGCGGAGGGTCCGGCGGCCGCTCATCTCGTGCGACATCAAGCTATACTCTAATAT	33	41	mRNA-capping enzyme catalytic subunit	http://www.ncbi.nlm.nih.gov/protein/P20979.1	mRNA-capping enzyme catalytic subunit	http://www.uniprot.org/uniprot/P04298	Vaccinia virus Copenhagen	http://purl.obolibrary.org/obo/NCBITaxon_10249	Vaccinia virus	http://purl.obolibrary.org/obo/NCBITaxon_10245
82090	Linear peptide	FIFLKKNEL	TTCATCTTCCTGAAGAAGAACGAGCTG	CAGGAGGGCTCGGCAttcatcttcctgaagaagaacgagctgGGATGCGGAGGGTCCGGCGGCCGCTCATCTCGTGCGACATCAAGCTATACTCTAATAT	703	711	Protein E2	http://www.ncbi.nlm.nih.gov/protein/AAO89337.1	Protein E2	http://www.uniprot.org/uniprot/P21604	Vaccinia virus WR	http://purl.obolibrary.org/obo/NCBITaxon_10254	Vaccinia virus	http://purl.obolibrary.org/obo/NCBITaxon_10245
84475	Linear peptide	KLIIDREVV	AAGCTGATCATCGACAGGGAGGTGGTG	CAGGAGGGCTCGGCAaagctgatcatcgacagggaggtggtgGGATGCGGAGGGTCCGGCGGCCGCTCATCTCGTGCGACATCAAGCTATACTCTAATAT	212	220	Protein I3	http://www.ncbi.nlm.nih.gov/protein/P20499.1	Protein I3	http://www.uniprot.org/uniprot/P12923	Vaccinia virus Copenhagen	http://purl.obolibrary.org/obo/NCBITaxon_10249	Vaccinia virus	http://purl.obolibrary.org/obo/NCBITaxon_10245
84532	Linear peptide	KLTFLDVEV	AAGCTGACCTTCCTGGACGTGGAGGTG	CAGGAGGGCTCGGCAaagctgaccttcctggacgtggaggtgGGATGCGGAGGGTCCGGCGGCCGCTCATCTCGTGCGACATCAAGCTATACTCTAATAT	157	165	DNA-directed RNA polymerase 35 kDa subunit	http://www.ncbi.nlm.nih.gov/protein/AAO89431.1	DNA-directed RNA polymerase 35 kDa subunit	http://www.uniprot.org/uniprot/P24757	Vaccinia virus WR	http://purl.obolibrary.org/obo/NCBITaxon_10254	Vaccinia virus	http://purl.obolibrary.org/obo/NCBITaxon_10245
87289	Linear peptide	PITDSLSFKL	CCCATCACCGACAGCCTGAGCTTCAAGCTG	CAGGAGGGCTCGGCAcccatcaccgacagcctgagcttcaagctgGGATGCGGAGGGTCCGGCGGCCGCTCATCTCGTGCGACATCAAGCTATACTCTAA	550	559	Protein O1	http://www.ncbi.nlm.nih.gov/protein/P21093.1	Protein O1	http://www.uniprot.org/uniprot/Q80HX1	Vaccinia virus Copenhagen	http://purl.obolibrary.org/obo/NCBITaxon_10249	Vaccinia virus	http://purl.obolibrary.org/obo/NCBITaxon_10245
88377	Linear peptide	SAPLPSNRV	AGCGCCCCCCTGCCCAGCAACAGGGTG	CAGGAGGGCTCGGCAagcgcccccctgcccagcaacagggtgGGATGCGGAGGGTCCGGCGGCCGCTCATCTCGTGCGACATCAAGCTATACTCTAATAT	472	480	Major viral transcription factor ICP4 homolog	http://www.ncbi.nlm.nih.gov/protein/AAP32859.1	Major viral transcription factor ICP4 homolog	http://www.uniprot.org/uniprot/P09310	Human alphaherpesvirus 3	http://purl.obolibrary.org/obo/NCBITaxon_10335	Human alphaherpesvirus 3	http://purl.obolibrary.org/obo/NCBITaxon_10335
88849	Linear peptide	SLPRSRTPI	AGCCTGCCCAGGAGCAGGACCCCCATC	CAGGAGGGCTCGGCAagcctgcccaggagcaggacccccatcGGATGCGGAGGGTCCGGCGGCCGCTCATCTCGTGCGACATCAAGCTATACTCTAATAT	445	453	Major viral transcription factor ICP4 homolog	http://www.ncbi.nlm.nih.gov/protein/AAP32859.1	Major viral transcription factor ICP4 homolog	http://www.uniprot.org/uniprot/P09310	Human alphaherpesvirus 3	http://purl.obolibrary.org/obo/NCBITaxon_10335	Human alphaherpesvirus 3	http://purl.obolibrary.org/obo/NCBITaxon_10335
90773	Linear peptide	YIIKKNDIV	TACATCATCAAGAAGAACGACATCGTG	CAGGAGGGCTCGGCAtacatcatcaagaagaacgacatcgtgGGATGCGGAGGGTCCGGCGGCCGCTCATCTCGTGCGACATCAAGCTATACTCTAATAT	764	772	mRNA-capping enzyme catalytic subunit	http://www.ncbi.nlm.nih.gov/protein/AAO89385.1	mRNA-capping enzyme catalytic subunit	http://www.uniprot.org/uniprot/P04298	Vaccinia virus WR	http://purl.obolibrary.org/obo/NCBITaxon_10254	Vaccinia virus	http://purl.obolibrary.org/obo/NCBITaxon_10245
92301	Linear peptide	AIYDTMQYV	GCCATCTACGACACCATGCAGTACGTG	CAGGAGGGCTCGGCAgccatctacgacaccatgcagtacgtgGGATGCGGAGGGTCCGGCGGCCGCTCATCTCGTGCGACATCAAGCTATACTCTAATAT	88	96	ATP-dependent Clp protease proteolytic subunit 2	http://www.ncbi.nlm.nih.gov/protein/NP_216976.1	ATP-dependent Clp protease proteolytic subunit 2	http://www.uniprot.org/uniprot/P9WPC3	Mycobacterium tuberculosis H37Rv	http://purl.obolibrary.org/obo/NCBITaxon_83332	Mycobacterium tuberculosis	http://purl.obolibrary.org/obo/NCBITaxon_1773
92817	Linear peptide	GLAGGAATA	GGCCTGGCCGGCGGCGCCGCCACCGCC	CAGGAGGGCTCGGCAggcctggccggcggcgccgccaccgccGGATGCGGAGGGTCCGGCGGCCGCTCATCTCGTGCGACATCAAGCTATACTCTAATAT	30	38	Diacylglycerol acyltransferase/mycolyltransferase Ag85B	http://www.ncbi.nlm.nih.gov/protein/NP_216402.1	Diacylglycerol acyltransferase/mycolyltransferase Ag85B	http://www.uniprot.org/uniprot/P9WQP1	Mycobacterium tuberculosis H37Rv	http://purl.obolibrary.org/obo/NCBITaxon_83332	Mycobacterium tuberculosis	http://purl.obolibrary.org/obo/NCBITaxon_1773
93270	Linear peptide	LLYDGSFAV	CTGCTGTACGACGGCAGCTTCGCCGTG	CAGGAGGGCTCGGCActgctgtacgacggcagcttcgccgtgGGATGCGGAGGGTCCGGCGGCCGCTCATCTCGTGCGACATCAAGCTATACTCTAATAT	42	50	Other Mycobacterium tuberculosis protein	http://www.ncbi.nlm.nih.gov/protein/NP_218356.1			Mycobacterium tuberculosis H37Rv	http://purl.obolibrary.org/obo/NCBITaxon_83332	Mycobacterium tuberculosis	http://purl.obolibrary.org/obo/NCBITaxon_1773
95059	Linear peptide	AMAGASTSA	GCCATGGCCGGCGCCAGCACCAGCGCC	CAGGAGGGCTCGGCAgccatggccggcgccagcaccagcgccGGATGCGGAGGGTCCGGCGGCCGCTCATCTCGTGCGACATCAAGCTATACTCTAATAT	425	433	65 kDa phosphoprotein	http://www.ncbi.nlm.nih.gov/protein/P06725.2	65 kDa phosphoprotein	http://www.uniprot.org/uniprot/Q6SW59	Human herpesvirus 5 strain AD169	http://purl.obolibrary.org/obo/NCBITaxon_10360	Human betaherpesvirus 5	http://purl.obolibrary.org/obo/NCBITaxon_10359	The authors cite Swiss-Prot accession P06725 (GI: 130714) as the source of the epitope.
95083	Linear peptide	FTWPPWQAGI	TTCACCTGGCCCCCCTGGCAGGCCGGCATC	CAGGAGGGCTCGGCAttcacctggcccccctggcaggccggcatcGGATGCGGAGGGTCCGGCGGCCGCTCATCTCGTGCGACATCAAGCTATACTCTAA	482	491	65 kDa phosphoprotein	http://www.ncbi.nlm.nih.gov/protein/P06725.2	65 kDa phosphoprotein	http://www.uniprot.org/uniprot/Q6SW59	Human herpesvirus 5 strain AD169	http://purl.obolibrary.org/obo/NCBITaxon_10360	Human betaherpesvirus 5	http://purl.obolibrary.org/obo/NCBITaxon_10359	The authors cite Swiss-Prot accession P06725 (GI: 130714) as the source of the epitope.
95091	Linear peptide	GVYDGREHTV	GGCGTGTACGACGGCAGGGAGCACACCGTG	CAGGAGGGCTCGGCAggcgtgtacgacggcagggagcacaccgtgGGATGCGGAGGGTCCGGCGGCCGCTCATCTCGTGCGACATCAAGCTATACTCTAA	230	239	Melanoma-associated antigen 4	http://www.ncbi.nlm.nih.gov/protein/AAA19007.1	Melanoma-associated antigen 4	http://www.uniprot.org/uniprot/P43358	Homo sapiens	http://purl.obolibrary.org/obo/NCBITaxon_9606	Homo sapiens	http://purl.obolibrary.org/obo/NCBITaxon_9606
95105	Linear peptide	KISHIMLDVA	AAGATCAGCCACATCATGCTGGACGTGGCC	CAGGAGGGCTCGGCAaagatcagccacatcatgctggacgtggccGGATGCGGAGGGTCCGGCGGCCGCTCATCTCGTGCGACATCAAGCTATACTCTAA	286	295	65 kDa phosphoprotein	http://www.ncbi.nlm.nih.gov/protein/P06725.2	65 kDa phosphoprotein	http://www.uniprot.org/uniprot/Q6SW59	Human herpesvirus 5 strain AD169	http://purl.obolibrary.org/obo/NCBITaxon_10360	Human betaherpesvirus 5	http://purl.obolibrary.org/obo/NCBITaxon_10359	The authors cite Swiss-Prot accession P06725 (GI: 130714) as the source of the epitope.
95112	Linear peptide	KYQEFFWDA	AAGTACCAGGAGTTCTTCTGGGACGCC	CAGGAGGGCTCGGCAaagtaccaggagttcttctgggacgccGGATGCGGAGGGTCCGGCGGCCGCTCATCTCGTGCGACATCAAGCTATACTCTAATAT	509	517	65 kDa phosphoprotein	http://www.ncbi.nlm.nih.gov/protein/P06725.2	65 kDa phosphoprotein	http://www.uniprot.org/uniprot/Q6SW59	Human herpesvirus 5 strain AD169	http://purl.obolibrary.org/obo/NCBITaxon_10360	Human betaherpesvirus 5	http://purl.obolibrary.org/obo/NCBITaxon_10359	The authors cite Swiss-Prot accession P06725 (GI: 130714) as the source of the epitope.
95115	Linear peptide	LLCPKSIPGL	CTGCTGTGCCCCAAGAGCATCCCCGGCCTG	CAGGAGGGCTCGGCActgctgtgccccaagagcatccccggcctgGGATGCGGAGGGTCCGGCGGCCGCTCATCTCGTGCGACATCAAGCTATACTCTAA	304	313	65 kDa phosphoprotein	http://www.ncbi.nlm.nih.gov/protein/P06725.2	65 kDa phosphoprotein	http://www.uniprot.org/uniprot/Q6SW59	Human herpesvirus 5 strain AD169	http://purl.obolibrary.org/obo/NCBITaxon_10360	Human betaherpesvirus 5	http://purl.obolibrary.org/obo/NCBITaxon_10359	The authors cite Swiss-Prot accession P06725 (GI: 130714) as the source of the epitope.
95145	Linear peptide	SDNEIHNPAV	AGCGACAACGAGATCCACAACCCCGCCGTG	CAGGAGGGCTCGGCAagcgacaacgagatccacaaccccgccgtgGGATGCGGAGGGTCCGGCGGCCGCTCATCTCGTGCGACATCAAGCTATACTCTAA	472	481	65 kDa phosphoprotein	http://www.ncbi.nlm.nih.gov/protein/P06725.2	65 kDa phosphoprotein	http://www.uniprot.org/uniprot/Q6SW59	Human herpesvirus 5 strain AD169	http://purl.obolibrary.org/obo/NCBITaxon_10360	Human betaherpesvirus 5	http://purl.obolibrary.org/obo/NCBITaxon_10359	The authors cite Swiss-Prot accession P06725 (GI: 130714) as the source of the epitope.
95151	Linear peptide	SLILVSQYT	AGCCTGATCCTGGTGAGCCAGTACACC	CAGGAGGGCTCGGCAagcctgatcctggtgagccagtacaccGGATGCGGAGGGTCCGGCGGCCGCTCATCTCGTGCGACATCAAGCTATACTCTAATAT	54	62	65 kDa phosphoprotein	http://www.ncbi.nlm.nih.gov/protein/P06725.2	65 kDa phosphoprotein	http://www.uniprot.org/uniprot/Q6SW59	Human herpesvirus 5 strain AD169	http://purl.obolibrary.org/obo/NCBITaxon_10360	Human betaherpesvirus 5	http://purl.obolibrary.org/obo/NCBITaxon_10359	The authors cite Swiss-Prot accession P06725 (GI: 130714) as the source of the epitope.
95278	Linear peptide	CINGVCWSI	TGCATCAACGGCGTGTGCTGGAGCATC	CAGGAGGGCTCGGCAtgcatcaacggcgtgtgctggagcatcGGATGCGGAGGGTCCGGCGGCCGCTCATCTCGTGCGACATCAAGCTATACTCTAATAT	47	55	Genome polyprotein	http://www.ncbi.nlm.nih.gov/protein/BAC67110.1	Genome polyprotein	http://www.uniprot.org/uniprot/P27958	Hepatitis C virus	http://purl.obolibrary.org/obo/NCBITaxon_11103	Hepatitis C virus	http://purl.obolibrary.org/obo/NCBITaxon_11103
95279	Linear peptide	CINGVCWSV	TGCATCAACGGCGTGTGCTGGAGCGTG	CAGGAGGGCTCGGCAtgcatcaacggcgtgtgctggagcgtgGGATGCGGAGGGTCCGGCGGCCGCTCATCTCGTGCGACATCAAGCTATACTCTAATAT	1073	1081	Genome polyprotein	http://www.ncbi.nlm.nih.gov/protein/BAG31965.1	Genome polyprotein	http://www.uniprot.org/uniprot/P27958	Hepatitis C virus	http://purl.obolibrary.org/obo/NCBITaxon_11103	Hepatitis C virus	http://purl.obolibrary.org/obo/NCBITaxon_11103
95281	Linear peptide	CISGVCWTV	TGCATCAGCGGCGTGTGCTGGACCGTG	CAGGAGGGCTCGGCAtgcatcagcggcgtgtgctggaccgtgGGATGCGGAGGGTCCGGCGGCCGCTCATCTCGTGCGACATCAAGCTATACTCTAATAT	1073	1081	polyprotein	http://www.ncbi.nlm.nih.gov/protein/BAA03375.1	Genome polyprotein	http://www.uniprot.org/uniprot/P27958	Hepatitis C virus	http://purl.obolibrary.org/obo/NCBITaxon_11103	Hepatitis C virus	http://purl.obolibrary.org/obo/NCBITaxon_11103		analog
95972	Linear peptide	VMAPRTVLL	GTGATGGCCCCCAGGACCGTGCTGCTG	CAGGAGGGCTCGGCAgtgatggcccccaggaccgtgctgctgGGATGCGGAGGGTCCGGCGGCCGCTCATCTCGTGCGACATCAAGCTATACTCTAATAT	3	11	HLA class I histocompatibility antigen, B-7 alpha chain	http://www.ncbi.nlm.nih.gov/protein/P01889.3	HLA class I histocompatibility antigen, B-7 alpha chain	http://www.uniprot.org/uniprot/P01889	Homo sapiens	http://purl.obolibrary.org/obo/NCBITaxon_9606	Homo sapiens	http://purl.obolibrary.org/obo/NCBITaxon_9606
96646	Linear peptide	MLLSVPLLLG	ATGCTGCTGAGCGTGCCCCTGCTGCTGGGC	CAGGAGGGCTCGGCAatgctgctgagcgtgcccctgctgctgggcGGATGCGGAGGGTCCGGCGGCCGCTCATCTCGTGCGACATCAAGCTATACTCTAA	1	10	Calreticulin	http://www.ncbi.nlm.nih.gov/protein/P27797.1	Calreticulin	http://www.uniprot.org/uniprot/P27797	Homo sapiens	http://purl.obolibrary.org/obo/NCBITaxon_9606	Homo sapiens	http://purl.obolibrary.org/obo/NCBITaxon_9606
97314	Linear peptide	FVANFSMEL	TTCGTGGCCAACTTCAGCATGGAGCTG	CAGGAGGGCTCGGCAttcgtggccaacttcagcatggagctgGGATGCGGAGGGTCCGGCGGCCGCTCATCTCGTGCGACATCAAGCTATACTCTAATAT	501	509	RNA-directed RNA polymerase catalytic subunit	http://www.ncbi.nlm.nih.gov/protein/P03431.1	RNA-directed RNA polymerase catalytic subunit	http://www.uniprot.org/uniprot/P03431	Influenza A virus (A/Puerto Rico/8/1934(H1N1))	http://purl.obolibrary.org/obo/NCBITaxon_211044	Influenza A virus	http://purl.obolibrary.org/obo/NCBITaxon_11320
97338	Linear peptide	GIDPNIRTGV	GGCATCGACCCCAACATCAGGACCGGCGTG	CAGGAGGGCTCGGCAggcatcgaccccaacatcaggaccggcgtgGGATGCGGAGGGTCCGGCGGCCGCTCATCTCGTGCGACATCAAGCTATACTCTAA	112	121	Genome polyprotein	http://www.ncbi.nlm.nih.gov/protein/ABQ95864.1	Genome polyprotein	http://www.uniprot.org/uniprot/P27958	Hepatitis C virus subtype 1a	http://purl.obolibrary.org/obo/NCBITaxon_31646	Hepatitis C virus	http://purl.obolibrary.org/obo/NCBITaxon_11103
97373	Linear peptide	GVDPNIRTGV	GGCGTGGACCCCAACATCAGGACCGGCGTG	CAGGAGGGCTCGGCAggcgtggaccccaacatcaggaccggcgtgGGATGCGGAGGGTCCGGCGGCCGCTCATCTCGTGCGACATCAAGCTATACTCTAA	1275	1284	Genome polyprotein	http://www.ncbi.nlm.nih.gov/protein/ACE82359.1	Genome polyprotein	http://www.uniprot.org/uniprot/P27958	Hepatitis C virus subtype 1a	http://purl.obolibrary.org/obo/NCBITaxon_31646	Hepatitis C virus	http://purl.obolibrary.org/obo/NCBITaxon_11103
97397	Linear peptide	ILGFVFTL	ATCCTGGGCTTCGTGTTCACCCTG	CAGGAGGGCTCGGCAatcctgggcttcgtgttcaccctgGGATGCGGAGGGTCCGGCGGCCGCTCATCTCGTGCGACATCAAGCTATACTCTAATATAGC	59	66	Matrix protein 1	http://www.ncbi.nlm.nih.gov/protein/ABO21712.1	Matrix protein 1	http://www.uniprot.org/uniprot/P03485	Influenza A virus (A/Puerto Rico/8/1934(H1N1))	http://purl.obolibrary.org/obo/NCBITaxon_211044	Influenza A virus	http://purl.obolibrary.org/obo/NCBITaxon_11320
98039	Linear peptide	FLSHNFTLVF	TTCCTGAGCCACAACTTCACCCTGGTGTTC	CAGGAGGGCTCGGCAttcctgagccacaacttcaccctggtgttcGGATGCGGAGGGTCCGGCGGCCGCTCATCTCGTGCGACATCAAGCTATACTCTAA			Other Trypanosoma cruzi protein	https://ontology.iedb.org/ontology/ONTIE_0002050			Trypanosoma cruzi	http://purl.obolibrary.org/obo/NCBITaxon_5693	Trypanosoma cruzi	http://purl.obolibrary.org/obo/NCBITaxon_5693	The epitope sequence was presumably derived from the nucleotide sequence of a Trans-sialidase pseudogene.
98466	Linear peptide	SLSHYFTLVF	AGCCTGAGCCACTACTTCACCCTGGTGTTC	CAGGAGGGCTCGGCAagcctgagccactacttcaccctggtgttcGGATGCGGAGGGTCCGGCGGCCGCTCATCTCGTGCGACATCAAGCTATACTCTAA			Other Trypanosoma cruzi protein	https://ontology.iedb.org/ontology/ONTIE_0002050			Trypanosoma cruzi	http://purl.obolibrary.org/obo/NCBITaxon_5693	Trypanosoma cruzi	http://purl.obolibrary.org/obo/NCBITaxon_5693	The epitope sequence was presumably derived from the nucleotide sequence of a Trans-sialidase pseudogene.
99044	Linear peptide	VMAPRALLL	GTGATGGCCCCCAGGGCCCTGCTGCTG	CAGGAGGGCTCGGCAgtgatggcccccagggccctgctgctgGGATGCGGAGGGTCCGGCGGCCGCTCATCTCGTGCGACATCAAGCTATACTCTAATAT	3	11	HLA class I histocompatibility antigen, Cw-7 alpha chain	http://www.ncbi.nlm.nih.gov/protein/P10321.3	HLA class I histocompatibility antigen, Cw-7 alpha chain	http://www.uniprot.org/uniprot/P10321	Homo sapiens	http://purl.obolibrary.org/obo/NCBITaxon_9606	Homo sapiens	http://purl.obolibrary.org/obo/NCBITaxon_9606
100725	Linear peptide	ALWMRLLPL	GCCCTGTGGATGAGGCTGCTGCCCCTG	CAGGAGGGCTCGGCAgccctgtggatgaggctgctgcccctgGGATGCGGAGGGTCCGGCGGCCGCTCATCTCGTGCGACATCAAGCTATACTCTAATAT	2	10	Insulin (UniProt:P01308)	http://www.ncbi.nlm.nih.gov/protein/P01308.1	Insulin	http://www.uniprot.org/uniprot/P01308	Homo sapiens	http://purl.obolibrary.org/obo/NCBITaxon_9606	Homo sapiens	http://purl.obolibrary.org/obo/NCBITaxon_9606
100843	Linear peptide	FLFAVGFYL	TTCCTGTTCGCCGTGGGCTTCTACCTG	CAGGAGGGCTCGGCAttcctgttcgccgtgggcttctacctgGGATGCGGAGGGTCCGGCGGCCGCTCATCTCGTGCGACATCAAGCTATACTCTAATAT	215	223	Glucose-6-phosphatase 2	http://www.ncbi.nlm.nih.gov/protein/NP_066999.1	Glucose-6-phosphatase 2	http://www.uniprot.org/uniprot/Q9NQR9	Homo sapiens	http://purl.obolibrary.org/obo/NCBITaxon_9606	Homo sapiens	http://purl.obolibrary.org/obo/NCBITaxon_9606
100844	Linear peptide	FLIVLSVAL	TTCCTGATCGTGCTGAGCGTGGCCCTG	CAGGAGGGCTCGGCAttcctgatcgtgctgagcgtggccctgGGATGCGGAGGGTCCGGCGGCCGCTCATCTCGTGCGACATCAAGCTATACTCTAATAT	9	17	Islet amyloid polypeptide	http://www.ncbi.nlm.nih.gov/protein/P10997.1	Islet amyloid polypeptide	http://www.uniprot.org/uniprot/P10997	Homo sapiens	http://purl.obolibrary.org/obo/NCBITaxon_9606	Homo sapiens	http://purl.obolibrary.org/obo/NCBITaxon_9606
100845	Linear peptide	FLWSVFMLI	TTCCTGTGGAGCGTGTTCATGCTGATC	CAGGAGGGCTCGGCAttcctgtggagcgtgttcatgctgatcGGATGCGGAGGGTCCGGCGGCCGCTCATCTCGTGCGACATCAAGCTATACTCTAATAT			Glucose-6-phosphatase 2	https://ontology.iedb.org/ontology/ONTIE_0002097	Glucose-6-phosphatase 2	http://www.uniprot.org/uniprot/Q9NQR9	Homo sapiens	http://purl.obolibrary.org/obo/NCBITaxon_9606	Homo sapiens	http://purl.obolibrary.org/obo/NCBITaxon_9606
100882	Linear peptide	GIVEQCCTSI	GGCATCGTGGAGCAGTGCTGCACCAGCATC	CAGGAGGGCTCGGCAggcatcgtggagcagtgctgcaccagcatcGGATGCGGAGGGTCCGGCGGCCGCTCATCTCGTGCGACATCAAGCTATACTCTAA	90	99	Insulin (UniProt:P01308)	http://www.ncbi.nlm.nih.gov/protein/P01308.1	Insulin	http://www.uniprot.org/uniprot/P01308	Homo sapiens	http://purl.obolibrary.org/obo/NCBITaxon_9606	Homo sapiens	http://purl.obolibrary.org/obo/NCBITaxon_9606
100920	Linear peptide	HLVEALYLV	CACCTGGTGGAGGCCCTGTACCTGGTG	CAGGAGGGCTCGGCAcacctggtggaggccctgtacctggtgGGATGCGGAGGGTCCGGCGGCCGCTCATCTCGTGCGACATCAAGCTATACTCTAATAT	34	42	Insulin (UniProt:P01308)	http://www.ncbi.nlm.nih.gov/protein/P01308.1	Insulin	http://www.uniprot.org/uniprot/P01308	Homo sapiens	http://purl.obolibrary.org/obo/NCBITaxon_9606	Homo sapiens	http://purl.obolibrary.org/obo/NCBITaxon_9606
100981	Linear peptide	KLQVFLIVL	AAGCTGCAGGTGTTCCTGATCGTGCTG	CAGGAGGGCTCGGCAaagctgcaggtgttcctgatcgtgctgGGATGCGGAGGGTCCGGCGGCCGCTCATCTCGTGCGACATCAAGCTATACTCTAATAT	5	13	Islet amyloid polypeptide	http://www.ncbi.nlm.nih.gov/protein/P10997.1	Islet amyloid polypeptide	http://www.uniprot.org/uniprot/P10997	Homo sapiens	http://purl.obolibrary.org/obo/NCBITaxon_9606	Homo sapiens	http://purl.obolibrary.org/obo/NCBITaxon_9606
101026	Linear peptide	LLPPLLEHL	CTGCTGCCCCCCCTGCTGGAGCACCTG	CAGGAGGGCTCGGCActgctgccccccctgctggagcacctgGGATGCGGAGGGTCCGGCGGCCGCTCATCTCGTGCGACATCAAGCTATACTCTAATAT	180	188	Receptor-type tyrosine-protein phosphatase-like N	http://www.ncbi.nlm.nih.gov/protein/Q16849.1	Receptor-type tyrosine-protein phosphatase-like N	http://www.uniprot.org/uniprot/Q16849	Homo sapiens	http://purl.obolibrary.org/obo/NCBITaxon_9606	Homo sapiens	http://purl.obolibrary.org/obo/NCBITaxon_9606
101199	Linear peptide	RLLCALTSL	AGGCTGCTGTGCGCCCTGACCAGCCTG	CAGGAGGGCTCGGCAaggctgctgtgcgccctgaccagcctgGGATGCGGAGGGTCCGGCGGCCGCTCATCTCGTGCGACATCAAGCTATACTCTAATAT	293	301	Glucose-6-phosphatase 2	http://www.ncbi.nlm.nih.gov/protein/NP_066999.1	Glucose-6-phosphatase 2	http://www.uniprot.org/uniprot/Q9NQR9	Homo sapiens	http://purl.obolibrary.org/obo/NCBITaxon_9606	Homo sapiens	http://purl.obolibrary.org/obo/NCBITaxon_9606
101237	Linear peptide	SLAAGVKLL	AGCCTGGCCGCCGGCGTGAAGCTGCTG	CAGGAGGGCTCGGCAagcctggccgccggcgtgaagctgctgGGATGCGGAGGGTCCGGCGGCCGCTCATCTCGTGCGACATCAAGCTATACTCTAATAT	482	490	Receptor-type tyrosine-protein phosphatase-like N	http://www.ncbi.nlm.nih.gov/protein/Q16849.1	Receptor-type tyrosine-protein phosphatase-like N	http://www.uniprot.org/uniprot/Q16849	Homo sapiens	http://purl.obolibrary.org/obo/NCBITaxon_9606	Homo sapiens	http://purl.obolibrary.org/obo/NCBITaxon_9606
101241	Linear peptide	SLQKRGIVEQ	AGCCTGCAGAAGAGGGGCATCGTGGAGCAG	CAGGAGGGCTCGGCAagcctgcagaagaggggcatcgtggagcagGGATGCGGAGGGTCCGGCGGCCGCTCATCTCGTGCGACATCAAGCTATACTCTAA	85	94	Insulin (UniProt:P01308)	http://www.ncbi.nlm.nih.gov/protein/P01308.1	Insulin	http://www.uniprot.org/uniprot/P01308	Homo sapiens	http://purl.obolibrary.org/obo/NCBITaxon_9606	Homo sapiens	http://purl.obolibrary.org/obo/NCBITaxon_9606
101242	Linear peptide	SLQPLALEG	AGCCTGCAGCCCCTGGCCCTGGAGGGC	CAGGAGGGCTCGGCAagcctgcagcccctggccctggagggcGGATGCGGAGGGTCCGGCGGCCGCTCATCTCGTGCGACATCAAGCTATACTCTAATAT	76	84	Insulin (UniProt:P01308)	http://www.ncbi.nlm.nih.gov/protein/P01308.1	Insulin	http://www.uniprot.org/uniprot/P01308	Homo sapiens	http://purl.obolibrary.org/obo/NCBITaxon_9606	Homo sapiens	http://purl.obolibrary.org/obo/NCBITaxon_9606
101245	Linear peptide	SLSPLQAEL	AGCCTGAGCCCCCTGCAGGCCGAGCTG	CAGGAGGGCTCGGCAagcctgagccccctgcaggccgagctgGGATGCGGAGGGTCCGGCGGCCGCTCATCTCGTGCGACATCAAGCTATACTCTAATAT	172	180	Receptor-type tyrosine-protein phosphatase-like N	http://www.ncbi.nlm.nih.gov/protein/Q16849.1	Receptor-type tyrosine-protein phosphatase-like N	http://www.uniprot.org/uniprot/Q16849	Homo sapiens	http://purl.obolibrary.org/obo/NCBITaxon_9606	Homo sapiens	http://purl.obolibrary.org/obo/NCBITaxon_9606
101248	Linear peptide	SLYQLENYC	AGCCTGTACCAGCTGGAGAACTACTGC	CAGGAGGGCTCGGCAagcctgtaccagctggagaactactgcGGATGCGGAGGGTCCGGCGGCCGCTCATCTCGTGCGACATCAAGCTATACTCTAATAT	101	109	Insulin (UniProt:P01308)	http://www.ncbi.nlm.nih.gov/protein/P01308.1	Insulin	http://www.uniprot.org/uniprot/P01308	Homo sapiens	http://purl.obolibrary.org/obo/NCBITaxon_9606	Homo sapiens	http://purl.obolibrary.org/obo/NCBITaxon_9606
101382	Linear peptide	VMAPRTLLL	GTGATGGCCCCCAGGACCCTGCTGCTG	CAGGAGGGCTCGGCAgtgatggcccccaggaccctgctgctgGGATGCGGAGGGTCCGGCGGCCGCTCATCTCGTGCGACATCAAGCTATACTCTAATAT	3	11	HLA class I histocompatibility antigen, A-1 alpha chain	http://www.ncbi.nlm.nih.gov/protein/P30443.1	HLA class I histocompatibility antigen, A-1 alpha chain	http://www.uniprot.org/uniprot/P30443	Homo sapiens	http://purl.obolibrary.org/obo/NCBITaxon_9606	Homo sapiens	http://purl.obolibrary.org/obo/NCBITaxon_9606
102306	Linear peptide	ALTAVAEEV	GCCCTGACCGCCGTGGCCGAGGAGGTG	CAGGAGGGCTCGGCAgccctgaccgccgtggccgaggaggtgGGATGCGGAGGGTCCGGCGGCCGCTCATCTCGTGCGACATCAAGCTATACTCTAATAT	962	970	Receptor-type tyrosine-protein phosphatase-like N	http://www.ncbi.nlm.nih.gov/protein/NP_002837.1	Receptor-type tyrosine-protein phosphatase-like N	http://www.uniprot.org/uniprot/Q16849	Homo sapiens	http://purl.obolibrary.org/obo/NCBITaxon_9606	Homo sapiens	http://purl.obolibrary.org/obo/NCBITaxon_9606
102433	Linear peptide	FLQDVMNIL	TTCCTGCAGGACGTGATGAACATCCTG	CAGGAGGGCTCGGCAttcctgcaggacgtgatgaacatcctgGGATGCGGAGGGTCCGGCGGCCGCTCATCTCGTGCGACATCAAGCTATACTCTAATAT	110	118	Glutamate decarboxylase 2	http://www.ncbi.nlm.nih.gov/protein/Q05329.1	Glutamate decarboxylase 2	http://www.uniprot.org/uniprot/Q05329	Homo sapiens	http://purl.obolibrary.org/obo/NCBITaxon_9606	Homo sapiens	http://purl.obolibrary.org/obo/NCBITaxon_9606
102620	Linear peptide	LLQEYNWEL	CTGCTGCAGGAGTACAACTGGGAGCTG	CAGGAGGGCTCGGCActgctgcaggagtacaactgggagctgGGATGCGGAGGGTCCGGCGGCCGCTCATCTCGTGCGACATCAAGCTATACTCTAATAT	141	149	Glutamate decarboxylase 2	http://www.ncbi.nlm.nih.gov/protein/Q05329.1	Glutamate decarboxylase 2	http://www.uniprot.org/uniprot/Q05329	Homo sapiens	http://purl.obolibrary.org/obo/NCBITaxon_9606	Homo sapiens	http://purl.obolibrary.org/obo/NCBITaxon_9606
102769	Linear peptide	RMMEYGTTMV	AGGATGATGGAGTACGGCACCACCATGGTG	CAGGAGGGCTCGGCAaggatgatggagtacggcaccaccatggtgGGATGCGGAGGGTCCGGCGGCCGCTCATCTCGTGCGACATCAAGCTATACTCTAA	536	545	Glutamate decarboxylase 2	http://www.ncbi.nlm.nih.gov/protein/Q05329.1	Glutamate decarboxylase 2	http://www.uniprot.org/uniprot/Q05329	Homo sapiens	http://purl.obolibrary.org/obo/NCBITaxon_9606	Homo sapiens	http://purl.obolibrary.org/obo/NCBITaxon_9606
102811	Linear peptide	SLYHVYEVNL	AGCCTGTACCACGTGTACGAGGTGAACCTG	CAGGAGGGCTCGGCAagcctgtaccacgtgtacgaggtgaacctgGGATGCGGAGGGTCCGGCGGCCGCTCATCTCGTGCGACATCAAGCTATACTCTAA	830	839	Receptor-type tyrosine-protein phosphatase-like N	http://www.ncbi.nlm.nih.gov/protein/NP_002837.1	Receptor-type tyrosine-protein phosphatase-like N	http://www.uniprot.org/uniprot/Q16849	Homo sapiens	http://purl.obolibrary.org/obo/NCBITaxon_9606	Homo sapiens	http://purl.obolibrary.org/obo/NCBITaxon_9606
102844	Linear peptide	TIADFWQMV	ACCATCGCCGACTTCTGGCAGATGGTG	CAGGAGGGCTCGGCAaccatcgccgacttctggcagatggtgGGATGCGGAGGGTCCGGCGGCCGCTCATCTCGTGCGACATCAAGCTATACTCTAATAT	790	798	Receptor-type tyrosine-protein phosphatase-like N	http://www.ncbi.nlm.nih.gov/protein/NP_002837.1	Receptor-type tyrosine-protein phosphatase-like N	http://www.uniprot.org/uniprot/Q16849	Homo sapiens	http://purl.obolibrary.org/obo/NCBITaxon_9606	Homo sapiens	http://purl.obolibrary.org/obo/NCBITaxon_9606
102877	Linear peptide	VCGERGFFYT	GTGTGCGGCGAGAGGGGCTTCTTCTACACC	CAGGAGGGCTCGGCAgtgtgcggcgagaggggcttcttctacaccGGATGCGGAGGGTCCGGCGGCCGCTCATCTCGTGCGACATCAAGCTATACTCTAA	42	51	Insulin (UniProt:P01308)	http://www.ncbi.nlm.nih.gov/protein/NP_000198.1	Insulin	http://www.uniprot.org/uniprot/P01308	Homo sapiens	http://purl.obolibrary.org/obo/NCBITaxon_9606	Homo sapiens	http://purl.obolibrary.org/obo/NCBITaxon_9606
102899	Linear peptide	VIVMLTPLV	GTGATCGTGATGCTGACCCCCCTGGTG	CAGGAGGGCTCGGCAgtgatcgtgatgctgacccccctggtgGGATGCGGAGGGTCCGGCGGCCGCTCATCTCGTGCGACATCAAGCTATACTCTAATAT	805	813	Receptor-type tyrosine-protein phosphatase-like N	http://www.ncbi.nlm.nih.gov/protein/NP_002837.1	Receptor-type tyrosine-protein phosphatase-like N	http://www.uniprot.org/uniprot/Q16849	Homo sapiens	http://purl.obolibrary.org/obo/NCBITaxon_9606	Homo sapiens	http://purl.obolibrary.org/obo/NCBITaxon_9606
102908	Linear peptide	VMNILLQYVV	GTGATGAACATCCTGCTGCAGTACGTGGTG	CAGGAGGGCTCGGCAgtgatgaacatcctgctgcagtacgtggtgGGATGCGGAGGGTCCGGCGGCCGCTCATCTCGTGCGACATCAAGCTATACTCTAA	114	123	Glutamate decarboxylase 2	http://www.ncbi.nlm.nih.gov/protein/AAA62367.1	Glutamate decarboxylase 2	http://www.uniprot.org/uniprot/Q05329	Homo sapiens	http://purl.obolibrary.org/obo/NCBITaxon_9606	Homo sapiens	http://purl.obolibrary.org/obo/NCBITaxon_9606
103041	Linear peptide	ALWGPDPAAA	GCCCTGTGGGGCCCCGACCCCGCCGCCGCC	CAGGAGGGCTCGGCAgccctgtggggccccgaccccgccgccgccGGATGCGGAGGGTCCGGCGGCCGCTCATCTCGTGCGACATCAAGCTATACTCTAA	15	24	Insulin (UniProt:P01308)	http://www.ncbi.nlm.nih.gov/protein/P01308.1	Insulin	http://www.uniprot.org/uniprot/P01308	Homo sapiens	http://purl.obolibrary.org/obo/NCBITaxon_9606	Homo sapiens	http://purl.obolibrary.org/obo/NCBITaxon_9606
103368	Linear peptide	LNIDLLWSV	CTGAACATCGACCTGCTGTGGAGCGTG	CAGGAGGGCTCGGCActgaacatcgacctgctgtggagcgtgGGATGCGGAGGGTCCGGCGGCCGCTCATCTCGTGCGACATCAAGCTATACTCTAATAT	228	236	Glucose-6-phosphatase 2	http://www.ncbi.nlm.nih.gov/protein/NP_066999.1	Glucose-6-phosphatase 2	http://www.uniprot.org/uniprot/Q9NQR9	Homo sapiens	http://purl.obolibrary.org/obo/NCBITaxon_9606	Homo sapiens	http://purl.obolibrary.org/obo/NCBITaxon_9606
103557	Linear peptide	RLLPLLALL	AGGCTGCTGCCCCTGCTGGCCCTGCTG	CAGGAGGGCTCGGCAaggctgctgcccctgctggccctgctgGGATGCGGAGGGTCCGGCGGCCGCTCATCTCGTGCGACATCAAGCTATACTCTAATAT	6	14	Insulin (UniProt:P01308)	http://www.ncbi.nlm.nih.gov/protein/NP_000198.1	Insulin	http://www.uniprot.org/uniprot/P01308	Homo sapiens	http://purl.obolibrary.org/obo/NCBITaxon_9606	Homo sapiens	http://purl.obolibrary.org/obo/NCBITaxon_9606
103705	Linear peptide	VLFGLGFAI	GTGCTGTTCGGCCTGGGCTTCGCCATC	CAGGAGGGCTCGGCAgtgctgttcggcctgggcttcgccatcGGATGCGGAGGGTCCGGCGGCCGCTCATCTCGTGCGACATCAAGCTATACTCTAATAT	265	273	Glucose-6-phosphatase 2	http://www.ncbi.nlm.nih.gov/protein/NP_066999.1	Glucose-6-phosphatase 2	http://www.uniprot.org/uniprot/Q9NQR9	Homo sapiens	http://purl.obolibrary.org/obo/NCBITaxon_9606	Homo sapiens	http://purl.obolibrary.org/obo/NCBITaxon_9606
103728	Linear peptide	WGPDPAAA	TGGGGCCCCGACCCCGCCGCCGCC	CAGGAGGGCTCGGCAtggggccccgaccccgccgccgccGGATGCGGAGGGTCCGGCGGCCGCTCATCTCGTGCGACATCAAGCTATACTCTAATATAGC	17	24	Insulin (UniProt:P01308)	http://www.ncbi.nlm.nih.gov/protein/P01308.1	Insulin	http://www.uniprot.org/uniprot/P01308	Homo sapiens	http://purl.obolibrary.org/obo/NCBITaxon_9606	Homo sapiens	http://purl.obolibrary.org/obo/NCBITaxon_9606
104248	Linear peptide	SHLVEALYLV	AGCCACCTGGTGGAGGCCCTGTACCTGGTG	CAGGAGGGCTCGGCAagccacctggtggaggccctgtacctggtgGGATGCGGAGGGTCCGGCGGCCGCTCATCTCGTGCGACATCAAGCTATACTCTAA	33	42	Insulin (UniProt:P01308)	http://www.ncbi.nlm.nih.gov/protein/NP_000198.1	Insulin	http://www.uniprot.org/uniprot/P01308	Homo sapiens	http://purl.obolibrary.org/obo/NCBITaxon_9606	Homo sapiens	http://purl.obolibrary.org/obo/NCBITaxon_9606
104336	Linear peptide	VMNILLQYV	GTGATGAACATCCTGCTGCAGTACGTG	CAGGAGGGCTCGGCAgtgatgaacatcctgctgcagtacgtgGGATGCGGAGGGTCCGGCGGCCGCTCATCTCGTGCGACATCAAGCTATACTCTAATAT	114	122	Glutamate decarboxylase 2	http://www.ncbi.nlm.nih.gov/protein/Q05329.1	Glutamate decarboxylase 2	http://www.uniprot.org/uniprot/Q05329	Homo sapiens	http://purl.obolibrary.org/obo/NCBITaxon_9606	Homo sapiens	http://purl.obolibrary.org/obo/NCBITaxon_9606
104489	Linear peptide	FQDENYLYL	TTCCAGGACGAGAACTACCTGTACCTG	CAGGAGGGCTCGGCAttccaggacgagaactacctgtacctgGGATGCGGAGGGTCCGGCGGCCGCTCATCTCGTGCGACATCAAGCTATACTCTAATAT	164	172	Other Homo sapiens (human) protein	http://www.ncbi.nlm.nih.gov/protein/AAH26328.1	Myotonin-protein kinase	http://www.uniprot.org/uniprot/Q09013	Homo sapiens	http://purl.obolibrary.org/obo/NCBITaxon_9606	Homo sapiens	http://purl.obolibrary.org/obo/NCBITaxon_9606
104767	Linear peptide	ELAEYLYNI	GAGCTGGCCGAGTACCTGTACAACATC	CAGGAGGGCTCGGCAgagctggccgagtacctgtacaacatcGGATGCGGAGGGTCCGGCGGCCGCTCATCTCGTGCGACATCAAGCTATACTCTAATAT	476	484	Glutamate decarboxylase 2	http://www.ncbi.nlm.nih.gov/protein/Q05329.1	Glutamate decarboxylase 2	http://www.uniprot.org/uniprot/Q05329	Homo sapiens	http://purl.obolibrary.org/obo/NCBITaxon_9606	Homo sapiens	http://purl.obolibrary.org/obo/NCBITaxon_9606
104844	Linear peptide	ILMHCQTTL	ATCCTGATGCACTGCCAGACCACCCTG	CAGGAGGGCTCGGCAatcctgatgcactgccagaccaccctgGGATGCGGAGGGTCCGGCGGCCGCTCATCTCGTGCGACATCAAGCTATACTCTAATAT	159	167	Glutamate decarboxylase 2	http://www.ncbi.nlm.nih.gov/protein/Q05329.1	Glutamate decarboxylase 2	http://www.uniprot.org/uniprot/Q05329	Homo sapiens	http://purl.obolibrary.org/obo/NCBITaxon_9606	Homo sapiens	http://purl.obolibrary.org/obo/NCBITaxon_9606
105191	Linear peptide	FLWSVFWLI	TTCCTGTGGAGCGTGTTCTGGCTGATC	CAGGAGGGCTCGGCAttcctgtggagcgtgttctggctgatcGGATGCGGAGGGTCCGGCGGCCGCTCATCTCGTGCGACATCAAGCTATACTCTAATAT	152	160	Glucose-6-phosphatase 2	http://www.ncbi.nlm.nih.gov/protein/NP_066999.1	Glucose-6-phosphatase 2	http://www.uniprot.org/uniprot/Q9NQR9	Homo sapiens	http://purl.obolibrary.org/obo/NCBITaxon_9606	Homo sapiens	http://purl.obolibrary.org/obo/NCBITaxon_9606
105247	Linear peptide	ILLARLFLY	ATCCTGCTGGCCAGGCTGTTCCTGTAC	CAGGAGGGCTCGGCAatcctgctggccaggctgttcctgtacGGATGCGGAGGGTCCGGCGGCCGCTCATCTCGTGCGACATCAAGCTATACTCTAATAT	231	239	Latent membrane protein 2	http://www.ncbi.nlm.nih.gov/protein/ADK56638.1	Latent membrane protein 2	http://www.uniprot.org/uniprot/P13285	Human gammaherpesvirus 4	http://purl.obolibrary.org/obo/NCBITaxon_10376	Human gammaherpesvirus 4	http://purl.obolibrary.org/obo/NCBITaxon_10376
105295	Linear peptide	LIVDAVLQL	CTGATCGTGGACGCCGTGCTGCAGCTG	CAGGAGGGCTCGGCActgatcgtggacgccgtgctgcagctgGGATGCGGAGGGTCCGGCGGCCGCTCATCTCGTGCGACATCAAGCTATACTCTAATAT	256	264	Latent membrane protein 2	http://www.ncbi.nlm.nih.gov/protein/P0C729.1	Latent membrane protein 2	http://www.uniprot.org/uniprot/P13285	Human gammaherpesvirus 4	http://purl.obolibrary.org/obo/NCBITaxon_10376	Human gammaherpesvirus 4	http://purl.obolibrary.org/obo/NCBITaxon_10376
105557	Linear peptide	TVCGGIMFL	ACCGTGTGCGGCGGCATCATGTTCCTG	CAGGAGGGCTCGGCAaccgtgtgcggcggcatcatgttcctgGGATGCGGAGGGTCCGGCGGCCGCTCATCTCGTGCGACATCAAGCTATACTCTAATAT	242	250	Latent membrane protein 2	http://www.ncbi.nlm.nih.gov/protein/P0C729.1	Latent membrane protein 2	http://www.uniprot.org/uniprot/P13285	Human gammaherpesvirus 4	http://purl.obolibrary.org/obo/NCBITaxon_10376	Human gammaherpesvirus 4	http://purl.obolibrary.org/obo/NCBITaxon_10376
105674	Linear peptide	ALWMRLLPLL	GCCCTGTGGATGAGGCTGCTGCCCCTGCTG	CAGGAGGGCTCGGCAgccctgtggatgaggctgctgcccctgctgGGATGCGGAGGGTCCGGCGGCCGCTCATCTCGTGCGACATCAAGCTATACTCTAA	2	11	Insulin (UniProt:P01308)	http://www.ncbi.nlm.nih.gov/protein/NP_000198.1	Insulin	http://www.uniprot.org/uniprot/P01308	Homo sapiens	http://purl.obolibrary.org/obo/NCBITaxon_9606	Homo sapiens	http://purl.obolibrary.org/obo/NCBITaxon_9606
106593	Linear peptide	LCGSHLVEAL	CTGTGCGGCAGCCACCTGGTGGAGGCCCTG	CAGGAGGGCTCGGCActgtgcggcagccacctggtggaggccctgGGATGCGGAGGGTCCGGCGGCCGCTCATCTCGTGCGACATCAAGCTATACTCTAA	30	39	Insulin (UniProt:P01308)	http://www.ncbi.nlm.nih.gov/protein/NP_000198.1	Insulin	http://www.uniprot.org/uniprot/P01308	Homo sapiens	http://purl.obolibrary.org/obo/NCBITaxon_9606	Homo sapiens	http://purl.obolibrary.org/obo/NCBITaxon_9606
106609	Linear peptide	LLDVAPLSL	CTGCTGGACGTGGCCCCCCTGAGCCTG	CAGGAGGGCTCGGCActgctggacgtggcccccctgagcctgGGATGCGGAGGGTCCGGCGGCCGCTCATCTCGTGCGACATCAAGCTATACTCTAATAT	370	378	Heat shock 70 kDa protein 1B	http://www.ncbi.nlm.nih.gov/protein/BAG58351.1	Heat shock 70 kDa protein 1B	http://www.uniprot.org/uniprot/P08107	Homo sapiens	http://purl.obolibrary.org/obo/NCBITaxon_9606	Homo sapiens	http://purl.obolibrary.org/obo/NCBITaxon_9606
106610	Linear peptide	LLLLDVAPL	CTGCTGCTGCTGGACGTGGCCCCCCTG	CAGGAGGGCTCGGCActgctgctgctggacgtggcccccctgGGATGCGGAGGGTCCGGCGGCCGCTCATCTCGTGCGACATCAAGCTATACTCTAATAT	391	399	Heat shock 70 kDa protein 1B	http://www.ncbi.nlm.nih.gov/protein/P08107.5	Heat shock 70 kDa protein 1B	http://www.uniprot.org/uniprot/P08107	Homo sapiens	http://purl.obolibrary.org/obo/NCBITaxon_9606	Homo sapiens	http://purl.obolibrary.org/obo/NCBITaxon_9606
106611	Linear peptide	LMGDKSENV	CTGATGGGCGACAAGAGCGAGAACGTG	CAGGAGGGCTCGGCActgatgggcgacaagagcgagaacgtgGGATGCGGAGGGTCCGGCGGCCGCTCATCTCGTGCGACATCAAGCTATACTCTAATAT	380	388	Heat shock 70 kDa protein 1B	http://www.ncbi.nlm.nih.gov/protein/P08107.5	Heat shock 70 kDa protein 1B	http://www.uniprot.org/uniprot/P08107	Homo sapiens	http://purl.obolibrary.org/obo/NCBITaxon_9606	Homo sapiens	http://purl.obolibrary.org/obo/NCBITaxon_9606
107771	Linear peptide	CLGGLLTMN	TGCCTGGGCGGCCTGCTGACCATGAAC	CAGGAGGGCTCGGCAtgcctgggcggcctgctgaccatgaacGGATGCGGAGGGTCCGGCGGCCGCTCATCTCGTGCGACATCAAGCTATACTCTAATAT			Latent membrane protein 2	https://ontology.iedb.org/ontology/ONTIE_0002376	Latent membrane protein 2	http://www.uniprot.org/uniprot/P13285	Human gammaherpesvirus 4	http://purl.obolibrary.org/obo/NCBITaxon_10376	Human gammaherpesvirus 4	http://purl.obolibrary.org/obo/NCBITaxon_10376
108006	Linear peptide	LLDFVRFMGY	CTGCTGGACTTCGTGAGGTTCATGGGCTAC	CAGGAGGGCTCGGCActgctggacttcgtgaggttcatgggctacGGATGCGGAGGGTCCGGCGGCCGCTCATCTCGTGCGACATCAAGCTATACTCTAA			Epstein-Barr nuclear antigen 6	https://ontology.iedb.org/ontology/ONTIE_0002538	Epstein-Barr nuclear antigen 6	http://www.uniprot.org/uniprot/P03204	Human gammaherpesvirus 4	http://purl.obolibrary.org/obo/NCBITaxon_10376	Human gammaherpesvirus 4	http://purl.obolibrary.org/obo/NCBITaxon_10376
108083	Linear peptide	QLLQHYREV	CAGCTGCTGCAGCACTACAGGGAGGTG	CAGGAGGGCTCGGCAcagctgctgcagcactacagggaggtgGGATGCGGAGGGTCCGGCGGCCGCTCATCTCGTGCGACATCAAGCTATACTCTAATAT	195	203	Trans-activator protein BZLF1	http://www.ncbi.nlm.nih.gov/protein/AAA66529.1	Trans-activator protein BZLF1	http://www.uniprot.org/uniprot/P03206	Human gammaherpesvirus 4	http://purl.obolibrary.org/obo/NCBITaxon_10376	Human gammaherpesvirus 4	http://purl.obolibrary.org/obo/NCBITaxon_10376
108191	Linear peptide	VMATLLPPV	GTGATGGCCACCCTGCTGCCCCCCGTG	CAGGAGGGCTCGGCAgtgatggccaccctgctgccccccgtgGGATGCGGAGGGTCCGGCGGCCGCTCATCTCGTGCGACATCAAGCTATACTCTAATAT	520	528	Epstein-Barr nuclear antigen 4	http://www.ncbi.nlm.nih.gov/protein/P03203.3	Epstein-Barr nuclear antigen 4	http://www.uniprot.org/uniprot/P03203	Human gammaherpesvirus 4	http://purl.obolibrary.org/obo/NCBITaxon_10376	Human gammaherpesvirus 4	http://purl.obolibrary.org/obo/NCBITaxon_10376
108770	Linear peptide	ALQAIELQL	GCCCTGCAGGCCATCGAGCTGCAGCTG	CAGGAGGGCTCGGCAgccctgcaggccatcgagctgcagctgGGATGCGGAGGGTCCGGCGGCCGCTCATCTCGTGCGACATCAAGCTATACTCTAATAT	69	77	Regulatory protein E2	http://www.ncbi.nlm.nih.gov/protein/ACS92695.1	Regulatory protein E2	http://www.uniprot.org/uniprot/P03120	Human papillomavirus type 16	http://purl.obolibrary.org/obo/NCBITaxon_333760	Alphapapillomavirus 9	http://purl.obolibrary.org/obo/NCBITaxon_337041	The epitope sequence was found in the cited reference, Konya et al, J Gen Virol: 78(10) 1997 [PMID 9349483].
108957	Linear peptide	FLLGLLFFV	TTCCTGCTGGGCCTGCTGTTCTTCGTG	CAGGAGGGCTCGGCAttcctgctgggcctgctgttcttcgtgGGATGCGGAGGGTCCGGCGGCCGCTCATCTCGTGCGACATCAAGCTATACTCTAATAT	325	333	Uncharacterized protein Rv1490	http://www.ncbi.nlm.nih.gov/protein/NP_216006.1	Uncharacterized protein Rv1490	http://www.uniprot.org/uniprot/P9WLX1	Mycobacterium tuberculosis	http://purl.obolibrary.org/obo/NCBITaxon_1773	Mycobacterium tuberculosis	http://purl.obolibrary.org/obo/NCBITaxon_1773
108965	Linear peptide	FLYELIWNV	TTCCTGTACGAGCTGATCTGGAACGTG	CAGGAGGGCTCGGCAttcctgtacgagctgatctggaacgtgGGATGCGGAGGGTCCGGCGGCCGCTCATCTCGTGCGACATCAAGCTATACTCTAATAT	197	205	Prolipoprotein diacylglyceryl transferase	http://www.ncbi.nlm.nih.gov/protein/O06131.1	Prolipoprotein diacylglyceryl transferase	http://www.uniprot.org/uniprot/P9WK93	Mycobacterium tuberculosis	http://purl.obolibrary.org/obo/NCBITaxon_1773	Mycobacterium tuberculosis	http://purl.obolibrary.org/obo/NCBITaxon_1773
109984	Linear peptide	TLQDVSLEV	ACCCTGCAGGACGTGAGCCTGGAGGTG	CAGGAGGGCTCGGCAaccctgcaggacgtgagcctggaggtgGGATGCGGAGGGTCCGGCGGCCGCTCATCTCGTGCGACATCAAGCTATACTCTAATAT	93	101	Regulatory protein E2	http://www.ncbi.nlm.nih.gov/protein/ACS92695.1	Regulatory protein E2	http://www.uniprot.org/uniprot/P03120	Human papillomavirus type 16	http://purl.obolibrary.org/obo/NCBITaxon_333760	Alphapapillomavirus 9	http://purl.obolibrary.org/obo/NCBITaxon_337041	The epitope sequence was found in the cited reference, Konya et al, J Gen Virol: 78(10) 1997 [PMID 9349483].
110040	Linear peptide	VLAGWLFHV	GTGCTGGCCGGCTGGCTGTTCCACGTG	CAGGAGGGCTCGGCAgtgctggccggctggctgttccacgtgGGATGCGGAGGGTCCGGCGGCCGCTCATCTCGTGCGACATCAAGCTATACTCTAATAT	1471	1479	Genome polyprotein	http://www.ncbi.nlm.nih.gov/protein/P03314.1	Genome polyprotein	http://www.uniprot.org/uniprot/P03314	Yellow fever virus 17D	http://purl.obolibrary.org/obo/NCBITaxon_11090	Yellow fever virus	http://purl.obolibrary.org/obo/NCBITaxon_11089
110125	Linear peptide	YICEEASVTV	TACATCTGCGAGGAGGCCAGCGTGACCGTG	CAGGAGGGCTCGGCAtacatctgcgaggaggccagcgtgaccgtgGGATGCGGAGGGTCCGGCGGCCGCTCATCTCGTGCGACATCAAGCTATACTCTAA	138	147	Regulatory protein E2	http://www.ncbi.nlm.nih.gov/protein/ACS92695.1	Regulatory protein E2	http://www.uniprot.org/uniprot/P03120	Human papillomavirus type 16	http://purl.obolibrary.org/obo/NCBITaxon_333760	Alphapapillomavirus 9	http://purl.obolibrary.org/obo/NCBITaxon_337041	The epitope sequence was found in the cited reference, Konya et al, J Gen Virol: 78(10) 1997 [PMID 9349483].
110206	Linear peptide	DLLLGTLNI	GACCTGCTGCTGGGCACCCTGAACATC	CAGGAGGGCTCGGCAgacctgctgctgggcaccctgaacatcGGATGCGGAGGGTCCGGCGGCCGCTCATCTCGTGCGACATCAAGCTATACTCTAATAT	81	89	Protein E7	http://www.ncbi.nlm.nih.gov/protein/P04020.1	Protein E7	http://www.uniprot.org/uniprot/P04020	Human papillomavirus type 11	http://purl.obolibrary.org/obo/NCBITaxon_10580	Alphapapillomavirus 10	http://purl.obolibrary.org/obo/NCBITaxon_333754
110225	Linear peptide	FQQLFLNTL	TTCCAGCAGCTGTTCCTGAACACCCTG	CAGGAGGGCTCGGCAttccagcagctgttcctgaacaccctgGGATGCGGAGGGTCCGGCGGCCGCTCATCTCGTGCGACATCAAGCTATACTCTAATAT	86	94	Protein E7	http://www.ncbi.nlm.nih.gov/protein/P06788.2	Protein E7	http://www.uniprot.org/uniprot/P06788	Human papillomavirus type 18	http://purl.obolibrary.org/obo/NCBITaxon_333761	Alphapapillomavirus 7	http://purl.obolibrary.org/obo/NCBITaxon_337042
110323	Linear peptide	LLLGTLNIV	CTGCTGCTGGGCACCCTGAACATCGTG	CAGGAGGGCTCGGCActgctgctgggcaccctgaacatcgtgGGATGCGGAGGGTCCGGCGGCCGCTCATCTCGTGCGACATCAAGCTATACTCTAATAT	82	90	Protein E7	http://www.ncbi.nlm.nih.gov/protein/AAF00065.1	Protein E7	http://www.uniprot.org/uniprot/P04020	Human papillomavirus type 6	http://purl.obolibrary.org/obo/NCBITaxon_31552	Alphapapillomavirus 10	http://purl.obolibrary.org/obo/NCBITaxon_333754
110325	Linear peptide	LLNYILKSV	CTGCTGAACTACATCCTGAAGAGCGTG	CAGGAGGGCTCGGCActgctgaactacatcctgaagagcgtgGGATGCGGAGGGTCCGGCGGCCGCTCATCTCGTGCGACATCAAGCTATACTCTAATAT	18	26	Outer capsid glycoprotein VP7	http://www.ncbi.nlm.nih.gov/protein/P03532.1	Outer capsid glycoprotein VP7	http://www.uniprot.org/uniprot/A2T3P5	Human rotavirus strain WA	http://purl.obolibrary.org/obo/NCBITaxon_10962	Rotavirus A	http://purl.obolibrary.org/obo/NCBITaxon_28875
110327	Linear peptide	LQPPDPVGL	CTGCAGCCCCCCGACCCCGTGGGCCTG	CAGGAGGGCTCGGCActgcagccccccgaccccgtgggcctgGGATGCGGAGGGTCCGGCGGCCGCTCATCTCGTGCGACATCAAGCTATACTCTAATAT	15	23	Protein E7	http://www.ncbi.nlm.nih.gov/protein/P04020.1	Protein E7	http://www.uniprot.org/uniprot/P04020	Human papillomavirus type 11	http://purl.obolibrary.org/obo/NCBITaxon_10580	Alphapapillomavirus 10	http://purl.obolibrary.org/obo/NCBITaxon_333754
110366	Linear peptide	PLTQHYQIL	CCCCTGACCCAGCACTACCAGATCCTG	CAGGAGGGCTCGGCAcccctgacccagcactaccagatcctgGGATGCGGAGGGTCCGGCGGCCGCTCATCTCGTGCGACATCAAGCTATACTCTAATAT	47	55	Protein E7	http://www.ncbi.nlm.nih.gov/protein/P04020.1	Protein E7	http://www.uniprot.org/uniprot/P04020	Human papillomavirus type 11	http://purl.obolibrary.org/obo/NCBITaxon_10580	Alphapapillomavirus 10	http://purl.obolibrary.org/obo/NCBITaxon_333754
110438	Linear peptide	TLKDIVLDL	ACCCTGAAGGACATCGTGCTGGACCTG	CAGGAGGGCTCGGCAaccctgaaggacatcgtgctggacctgGGATGCGGAGGGTCCGGCGGCCGCTCATCTCGTGCGACATCAAGCTATACTCTAATAT	7	15	Protein E7	http://www.ncbi.nlm.nih.gov/protein/P04020.1	Protein E7	http://www.uniprot.org/uniprot/P04020	Human papillomavirus type 11	http://purl.obolibrary.org/obo/NCBITaxon_10580	Alphapapillomavirus 10	http://purl.obolibrary.org/obo/NCBITaxon_333754
110439	Linear peptide	TLLQQYCLYL	ACCCTGCTGCAGCAGTACTGCCTGTACCTG	CAGGAGGGCTCGGCAaccctgctgcagcagtactgcctgtacctgGGATGCGGAGGGTCCGGCGGCCGCTCATCTCGTGCGACATCAAGCTATACTCTAA	253	262	Replication protein E1	http://www.ncbi.nlm.nih.gov/protein/P03114.2	Replication protein E1	http://www.uniprot.org/uniprot/P03114	Human papillomavirus type 16	http://purl.obolibrary.org/obo/NCBITaxon_333760	Alphapapillomavirus 9	http://purl.obolibrary.org/obo/NCBITaxon_337041	The epitope sequence was found in the cited reference, Konya et al, J Gen Virol: 78(10) 1997 [PMID 9349483].
110440	Linear peptide	TLQDIVLHL	ACCCTGCAGGACATCGTGCTGCACCTG	CAGGAGGGCTCGGCAaccctgcaggacatcgtgctgcacctgGGATGCGGAGGGTCCGGCGGCCGCTCATCTCGTGCGACATCAAGCTATACTCTAATAT	7	15	Protein E7	http://www.ncbi.nlm.nih.gov/protein/P06788.2	Protein E7	http://www.uniprot.org/uniprot/P06788	Human papillomavirus type 18	http://purl.obolibrary.org/obo/NCBITaxon_333761	Alphapapillomavirus 7	http://purl.obolibrary.org/obo/NCBITaxon_337042
110579	Linear peptide	FLLCFCVLL	TTCCTGCTGTGCTTCTGCGTGCTGCTG	CAGGAGGGCTCGGCAttcctgctgtgcttctgcgtgctgctgGGATGCGGAGGGTCCGGCGGCCGCTCATCTCGTGCGACATCAAGCTATACTCTAATAT	15	23	Probable protein E5	http://www.ncbi.nlm.nih.gov/protein/AAD24036.1	Probable protein E5	http://www.uniprot.org/uniprot/P06927	Human papillomavirus type 16	http://purl.obolibrary.org/obo/NCBITaxon_333760	Alphapapillomavirus 9	http://purl.obolibrary.org/obo/NCBITaxon_337041
110629	Linear peptide	ICWGNQLFV	ATCTGCTGGGGCAACCAGCTGTTCGTG	CAGGAGGGCTCGGCAatctgctggggcaaccagctgttcgtgGGATGCGGAGGGTCCGGCGGCCGCTCATCTCGTGCGACATCAAGCTATACTCTAATAT	349	357	Major capsid protein L1	http://www.ncbi.nlm.nih.gov/protein/ACG75893.1	Major capsid protein L1	http://www.uniprot.org/uniprot/P03101	Human papillomavirus type 16	http://purl.obolibrary.org/obo/NCBITaxon_333760	Alphapapillomavirus 9	http://purl.obolibrary.org/obo/NCBITaxon_337041
110736	Linear peptide	VLLCVCLLI	GTGCTGCTGTGCGTGTGCCTGCTGATC	CAGGAGGGCTCGGCAgtgctgctgtgcgtgtgcctgctgatcGGATGCGGAGGGTCCGGCGGCCGCTCATCTCGTGCGACATCAAGCTATACTCTAATAT	21	29	Probable protein E5	http://www.ncbi.nlm.nih.gov/protein/AAD24036.1	Probable protein E5	http://www.uniprot.org/uniprot/P06927	Human papillomavirus type 16	http://purl.obolibrary.org/obo/NCBITaxon_333760	Alphapapillomavirus 9	http://purl.obolibrary.org/obo/NCBITaxon_337041
110737	Linear peptide	VLLLWITAA	GTGCTGCTGCTGTGGATCACCGCCGCC	CAGGAGGGCTCGGCAgtgctgctgctgtggatcaccgccgccGGATGCGGAGGGTCCGGCGGCCGCTCATCTCGTGCGACATCAAGCTATACTCTAATAT	46	54	Probable protein E5	http://www.ncbi.nlm.nih.gov/protein/AAD24028.1	Probable protein E5	http://www.uniprot.org/uniprot/P06927	Human papillomavirus type 16	http://purl.obolibrary.org/obo/NCBITaxon_333760	Alphapapillomavirus 9	http://purl.obolibrary.org/obo/NCBITaxon_337041
110744	Linear peptide	YIIFVYIPL	TACATCATCTTCGTGTACATCCCCCTG	CAGGAGGGCTCGGCAtacatcatcttcgtgtacatccccctgGGATGCGGAGGGTCCGGCGGCCGCTCATCTCGTGCGACATCAAGCTATACTCTAATAT	63	71	Probable protein E5	http://www.ncbi.nlm.nih.gov/protein/AAD24036.1	Probable protein E5	http://www.uniprot.org/uniprot/P06927	Human papillomavirus type 16	http://purl.obolibrary.org/obo/NCBITaxon_333760	Alphapapillomavirus 9	http://purl.obolibrary.org/obo/NCBITaxon_337041
110917	Linear peptide	KLVCSPAPC	AAGCTGGTGTGCAGCCCCGCCCCCTGC	CAGGAGGGCTCGGCAaagctggtgtgcagccccgccccctgcGGATGCGGAGGGTCCGGCGGCCGCTCATCTCGTGCGACATCAAGCTATACTCTAATAT	140	148	Protein X	http://www.ncbi.nlm.nih.gov/protein/AAP06597.1	Protein X	http://www.uniprot.org/uniprot/Q69027	Hepatitis B virus	http://purl.obolibrary.org/obo/NCBITaxon_10407	Hepatitis B virus	http://purl.obolibrary.org/obo/NCBITaxon_10407
111252	Linear peptide	ELTEVFEFA	GAGCTGACCGAGGTGTTCGAGTTCGCC	CAGGAGGGCTCGGCAgagctgaccgaggtgttcgagttcgccGGATGCGGAGGGTCCGGCGGCCGCTCATCTCGTGCGACATCAAGCTATACTCTAATAT	40	48	Protein E6	http://www.ncbi.nlm.nih.gov/protein/P06463.1	Protein E6	http://www.uniprot.org/uniprot/P06463	Human papillomavirus type 18	http://purl.obolibrary.org/obo/NCBITaxon_333761	Alphapapillomavirus 7	http://purl.obolibrary.org/obo/NCBITaxon_337042
111266	Linear peptide	FAFKDLFVV	TTCGCCTTCAAGGACCTGTTCGTGGTG	CAGGAGGGCTCGGCAttcgccttcaaggacctgttcgtggtgGGATGCGGAGGGTCCGGCGGCCGCTCATCTCGTGCGACATCAAGCTATACTCTAATAT	47	55	Protein E6	http://www.ncbi.nlm.nih.gov/protein/P06463.1	Protein E6	http://www.uniprot.org/uniprot/P06463	Human papillomavirus type 18	http://purl.obolibrary.org/obo/NCBITaxon_333761	Alphapapillomavirus 7	http://purl.obolibrary.org/obo/NCBITaxon_337042
111442	Linear peptide	KCIDFYSRI	AAGTGCATCGACTTCTACAGCAGGATC	CAGGAGGGCTCGGCAaagtgcatcgacttctacagcaggatcGGATGCGGAGGGTCCGGCGGCCGCTCATCTCGTGCGACATCAAGCTATACTCTAATAT	67	75	Protein E6	http://www.ncbi.nlm.nih.gov/protein/P06463.1	Protein E6	http://www.uniprot.org/uniprot/P06463	Human papillomavirus type 18	http://purl.obolibrary.org/obo/NCBITaxon_333761	Alphapapillomavirus 7	http://purl.obolibrary.org/obo/NCBITaxon_337042	This conserved sequence is also present in HPV45 E6 protein.
111456	Linear peptide	KISEYRHYC	AAGATCAGCGAGTACAGGCACTACTGC	CAGGAGGGCTCGGCAaagatcagcgagtacaggcactactgcGGATGCGGAGGGTCCGGCGGCCGCTCATCTCGTGCGACATCAAGCTATACTCTAATAT	72	80	Protein E6	http://www.ncbi.nlm.nih.gov/protein/CAB45108.1	Protein E6	http://www.uniprot.org/uniprot/P03126	Human papillomavirus type 16	http://purl.obolibrary.org/obo/NCBITaxon_333760	Alphapapillomavirus 9	http://purl.obolibrary.org/obo/NCBITaxon_337041
111462	Linear peptide	KLTNTGLYNL	AAGCTGACCAACACCGGCCTGTACAACCTG	CAGGAGGGCTCGGCAaagctgaccaacaccggcctgtacaacctgGGATGCGGAGGGTCCGGCGGCCGCTCATCTCGTGCGACATCAAGCTATACTCTAA	92	101	Protein E6	http://www.ncbi.nlm.nih.gov/protein/P06463.1	Protein E6	http://www.uniprot.org/uniprot/P06463	Human papillomavirus type 18	http://purl.obolibrary.org/obo/NCBITaxon_333761	Alphapapillomavirus 7	http://purl.obolibrary.org/obo/NCBITaxon_337042
111465	Linear peptide	KTVLELTEV	AAGACCGTGCTGGAGCTGACCGAGGTG	CAGGAGGGCTCGGCAaagaccgtgctggagctgaccgaggtgGGATGCGGAGGGTCCGGCGGCCGCTCATCTCGTGCGACATCAAGCTATACTCTAATAT	36	44	Protein E6	http://www.ncbi.nlm.nih.gov/protein/P06463.1	Protein E6	http://www.uniprot.org/uniprot/P06463	Human papillomavirus type 18	http://purl.obolibrary.org/obo/NCBITaxon_333761	Alphapapillomavirus 7	http://purl.obolibrary.org/obo/NCBITaxon_337042
111479	Linear peptide	LFLNTLSFV	CTGTTCCTGAACACCCTGAGCTTCGTG	CAGGAGGGCTCGGCActgttcctgaacaccctgagcttcgtgGGATGCGGAGGGTCCGGCGGCCGCTCATCTCGTGCGACATCAAGCTATACTCTAATAT	89	97	Protein E7	http://www.ncbi.nlm.nih.gov/protein/P06788.2	Protein E7	http://www.uniprot.org/uniprot/P06788	Human papillomavirus type 18	http://purl.obolibrary.org/obo/NCBITaxon_333761	Alphapapillomavirus 7	http://purl.obolibrary.org/obo/NCBITaxon_337042
111512	Linear peptide	LQDIEITCV	CTGCAGGACATCGAGATCACCTGCGTG	CAGGAGGGCTCGGCActgcaggacatcgagatcacctgcgtgGGATGCGGAGGGTCCGGCGGCCGCTCATCTCGTGCGACATCAAGCTATACTCTAATAT	25	33	Protein E6	http://www.ncbi.nlm.nih.gov/protein/P06463.1	Protein E6	http://www.uniprot.org/uniprot/P06463	Human papillomavirus type 18	http://purl.obolibrary.org/obo/NCBITaxon_333761	Alphapapillomavirus 7	http://purl.obolibrary.org/obo/NCBITaxon_337042
111789	Linear peptide	SLQDIEITCV	AGCCTGCAGGACATCGAGATCACCTGCGTG	CAGGAGGGCTCGGCAagcctgcaggacatcgagatcacctgcgtgGGATGCGGAGGGTCCGGCGGCCGCTCATCTCGTGCGACATCAAGCTATACTCTAA	24	33	Protein E6	http://www.ncbi.nlm.nih.gov/protein/P06463.1	Protein E6	http://www.uniprot.org/uniprot/P06463	Human papillomavirus type 18	http://purl.obolibrary.org/obo/NCBITaxon_333761	Alphapapillomavirus 7	http://purl.obolibrary.org/obo/NCBITaxon_337042
112167	Linear peptide	IPDEQKTIIGL	ATCCCCGACGAGCAGAAGACCATCATCGGCCTG	CAGGAGGGCTCGGCAatccccgacgagcagaagaccatcatcggcctgGGATGCGGAGGGTCCGGCGGCCGCTCATCTCGTGCGACATCAAGCTATACTC	91	101	Protein B14	http://www.ncbi.nlm.nih.gov/protein/AAB96554.1	Protein B14	http://www.uniprot.org/uniprot/P24772	Modified Vaccinia Ankara virus	http://purl.obolibrary.org/obo/NCBITaxon_467144	Vaccinia virus	http://purl.obolibrary.org/obo/NCBITaxon_10245
112180	Linear peptide	KITSYKFESV	AAGATCACCAGCTACAAGTTCGAGAGCGTG	CAGGAGGGCTCGGCAaagatcaccagctacaagttcgagagcgtgGGATGCGGAGGGTCCGGCGGCCGCTCATCTCGTGCGACATCAAGCTATACTCTAA	18	27	Soluble interferon gamma receptor B8	http://www.ncbi.nlm.nih.gov/protein/CAM58364.1	Soluble interferon gamma receptor B8	http://www.uniprot.org/uniprot/P24770	Vaccinia virus Ankara	http://purl.obolibrary.org/obo/NCBITaxon_126794	Vaccinia virus	http://purl.obolibrary.org/obo/NCBITaxon_10245
112182	Linear peptide	KLFSDISAI	AAGCTGTTCAGCGACATCAGCGCCATC	CAGGAGGGCTCGGCAaagctgttcagcgacatcagcgccatcGGATGCGGAGGGTCCGGCGGCCGCTCATCTCGTGCGACATCAAGCTATACTCTAATAT	117	125	Protein E5	http://www.ncbi.nlm.nih.gov/protein/AAO89340.1	Protein E5	http://www.uniprot.org/uniprot/P21606	Vaccinia virus WR	http://purl.obolibrary.org/obo/NCBITaxon_10254	Vaccinia virus	http://purl.obolibrary.org/obo/NCBITaxon_10245
112183	Linear peptide	KLIIHNPEL	AAGCTGATCATCCACAACCCCGAGCTG	CAGGAGGGCTCGGCAaagctgatcatccacaaccccgagctgGGATGCGGAGGGTCCGGCGGCCGCTCATCTCGTGCGACATCAAGCTATACTCTAATAT	207	215	Soluble interferon alpha/beta receptor B18	http://www.ncbi.nlm.nih.gov/protein/CAM58375.1	Soluble interferon alpha/beta receptor B18	http://www.uniprot.org/uniprot/P25213	Vaccinia virus Ankara	http://purl.obolibrary.org/obo/NCBITaxon_126794	Vaccinia virus	http://purl.obolibrary.org/obo/NCBITaxon_10245
112322	Linear peptide	SLKDVLVSV	AGCCTGAAGGACGTGCTGGTGAGCGTG	CAGGAGGGCTCGGCAagcctgaaggacgtgctggtgagcgtgGGATGCGGAGGGTCCGGCGGCCGCTCATCTCGTGCGACATCAAGCTATACTCTAATAT	27	35	DNA-directed RNA polymerase 7 kDa subunit	http://www.ncbi.nlm.nih.gov/protein/P68314.1	DNA-directed RNA polymerase 7 kDa subunit	http://www.uniprot.org/uniprot/P68317	Vaccinia virus Ankara	http://purl.obolibrary.org/obo/NCBITaxon_126794	Vaccinia virus	http://purl.obolibrary.org/obo/NCBITaxon_10245
112357	Linear peptide	TLLDHIRTA	ACCCTGCTGGACCACATCAGGACCGCC	CAGGAGGGCTCGGCAaccctgctggaccacatcaggaccgccGGATGCGGAGGGTCCGGCGGCCGCTCATCTCGTGCGACATCAAGCTATACTCTAATAT	178	186	Other Vaccinia virus protein	http://www.ncbi.nlm.nih.gov/protein/AAB96558.1	Protein B14	http://www.uniprot.org/uniprot/P24772	Modified Vaccinia Ankara virus	http://purl.obolibrary.org/obo/NCBITaxon_467144	Vaccinia virus	http://purl.obolibrary.org/obo/NCBITaxon_10245
113612	Linear peptide	LLFSFAQAV	CTGCTGTTCAGCTTCGCCCAGGCCGTG	CAGGAGGGCTCGGCActgctgttcagcttcgcccaggccgtgGGATGCGGAGGGTCCGGCGGCCGCTCATCTCGTGCGACATCAAGCTATACTCTAATAT	192	200	Other Toxoplasma gondii protein	http://www.ncbi.nlm.nih.gov/protein/XP_002367880.1			Toxoplasma gondii ME49	http://purl.obolibrary.org/obo/NCBITaxon_508771	Toxoplasma gondii	http://purl.obolibrary.org/obo/NCBITaxon_5811	The epitope was an exact to a sequence from the Homo sapiens host species.
115656	Linear peptide	TLDTKPLSV	ACCCTGGACACCAAGCCCCTGAGCGTG	CAGGAGGGCTCGGCAaccctggacaccaagcccctgagcgtgGGATGCGGAGGGTCCGGCGGCCGCTCATCTCGTGCGACATCAAGCTATACTCTAATAT			DNA polymerase processivity factor BMRF1	https://ontology.iedb.org/ontology/ONTIE_0002845	DNA polymerase processivity factor BMRF1	http://www.uniprot.org/uniprot/P03191	Human gammaherpesvirus 4	http://purl.obolibrary.org/obo/NCBITaxon_10376	Human gammaherpesvirus 4	http://purl.obolibrary.org/obo/NCBITaxon_10376
115871	Linear peptide	NLAQDLATV	AACCTGGCCCAGGACCTGGCCACCGTG	CAGGAGGGCTCGGCAaacctggcccaggacctggccaccgtgGGATGCGGAGGGTCCGGCGGCCGCTCATCTCGTGCGACATCAAGCTATACTCTAATAT	143	151	Glial fibrillary acidic protein (UniProt:P14136)	http://www.ncbi.nlm.nih.gov/protein/NP_001124491.1	Glial fibrillary acidic protein	http://www.uniprot.org/uniprot/P14136	Homo sapiens	http://purl.obolibrary.org/obo/NCBITaxon_9606	Homo sapiens	http://purl.obolibrary.org/obo/NCBITaxon_9606	The epitope is found in glial fibrillary acidic protein isoform 1 and isoform 2.
115919	Linear peptide	QLARQQVHV	CAGCTGGCCAGGCAGCAGGTGCACGTG	CAGGAGGGCTCGGCAcagctggccaggcagcaggtgcacgtgGGATGCGGAGGGTCCGGCGGCCGCTCATCTCGTGCGACATCAAGCTATACTCTAATAT	214	222	Glial fibrillary acidic protein (UniProt:P14136)	http://www.ncbi.nlm.nih.gov/protein/NP_001124491.1	Glial fibrillary acidic protein	http://www.uniprot.org/uniprot/P14136	Homo sapiens	http://purl.obolibrary.org/obo/NCBITaxon_9606	Homo sapiens	http://purl.obolibrary.org/obo/NCBITaxon_9606	The epitope is found in glial fibrillary acidic protein isoform 1 and isoform 2.
115968	Linear peptide	SLEEEIRFL	AGCCTGGAGGAGGAGATCAGGTTCCTG	CAGGAGGGCTCGGCAagcctggaggaggagatcaggttcctgGGATGCGGAGGGTCCGGCGGCCGCTCATCTCGTGCGACATCAAGCTATACTCTAATAT	192	200	Glial fibrillary acidic protein (UniProt:P14136)	http://www.ncbi.nlm.nih.gov/protein/NP_001124491.1	Glial fibrillary acidic protein	http://www.uniprot.org/uniprot/P14136	Homo sapiens	http://purl.obolibrary.org/obo/NCBITaxon_9606	Homo sapiens	http://purl.obolibrary.org/obo/NCBITaxon_9606	The epitope is found in glial fibrillary acidic protein isoform 1 and isoform 2.
116251	Linear peptide	ALLDQLHTL	GCCCTGCTGGACCAGCTGCACACCCTG	CAGGAGGGCTCGGCAgccctgctggaccagctgcacaccctgGGATGCGGAGGGTCCGGCGGCCGCTCATCTCGTGCGACATCAAGCTATACTCTAATAT	8	16	Nuclear receptor coactivator 3	http://www.ncbi.nlm.nih.gov/protein/1KBH_A	Nuclear receptor coactivator 3	http://www.uniprot.org/uniprot/Q9Y6Q9	Homo sapiens	http://purl.obolibrary.org/obo/NCBITaxon_9606	Homo sapiens	http://purl.obolibrary.org/obo/NCBITaxon_9606
116252	Linear peptide	ALNNLLHSL	GCCCTGAACAACCTGCTGCACAGCCTG	CAGGAGGGCTCGGCAgccctgaacaacctgctgcacagcctgGGATGCGGAGGGTCCGGCGGCCGCTCATCTCGTGCGACATCAAGCTATACTCTAATAT	99	107	Serine/threonine-protein kinase SMG1	http://www.ncbi.nlm.nih.gov/protein/AAG44786.1	Serine/threonine-protein kinase SMG1	http://www.uniprot.org/uniprot/Q96Q15	Homo sapiens	http://purl.obolibrary.org/obo/NCBITaxon_9606	Homo sapiens	http://purl.obolibrary.org/obo/NCBITaxon_9606
116337	Linear peptide	GLMTTVHAI	GGCCTGATGACCACCGTGCACGCCATC	CAGGAGGGCTCGGCAggcctgatgaccaccgtgcacgccatcGGATGCGGAGGGTCCGGCGGCCGCTCATCTCGTGCGACATCAAGCTATACTCTAATAT	173	181	Glyceraldehyde-3-phosphate dehydrogenase	http://www.ncbi.nlm.nih.gov/protein/4WNI_O	Glyceraldehyde-3-phosphate dehydrogenase	http://www.uniprot.org/uniprot/P04406	Homo sapiens	http://purl.obolibrary.org/obo/NCBITaxon_9606	Homo sapiens	http://purl.obolibrary.org/obo/NCBITaxon_9606
116376	Linear peptide	IVIGVLHQL	ATCGTGATCGGCGTGCTGCACCAGCTG	CAGGAGGGCTCGGCAatcgtgatcggcgtgctgcaccagctgGGATGCGGAGGGTCCGGCGGCCGCTCATCTCGTGCGACATCAAGCTATACTCTAATAT	285	293	Max-like protein X	http://www.ncbi.nlm.nih.gov/protein/Q9UH92.2	Max-like protein X	http://www.uniprot.org/uniprot/Q9UH92	Homo sapiens	http://purl.obolibrary.org/obo/NCBITaxon_9606	Homo sapiens	http://purl.obolibrary.org/obo/NCBITaxon_9606
116391	Linear peptide	KQLEVVHTL	AAGCAGCTGGAGGTGGTGCACACCCTG	CAGGAGGGCTCGGCAaagcagctggaggtggtgcacaccctgGGATGCGGAGGGTCCGGCGGCCGCTCATCTCGTGCGACATCAAGCTATACTCTAATAT	43	51	E3 UFM1-protein ligase 1	http://www.ncbi.nlm.nih.gov/protein/O94874.2	E3 UFM1-protein ligase 1	http://www.uniprot.org/uniprot/O94874	Homo sapiens	http://purl.obolibrary.org/obo/NCBITaxon_9606	Homo sapiens	http://purl.obolibrary.org/obo/NCBITaxon_9606
116441	Linear peptide	QLNEQVHSL	CAGCTGAACGAGCAGGTGCACAGCCTG	CAGGAGGGCTCGGCAcagctgaacgagcaggtgcacagcctgGGATGCGGAGGGTCCGGCGGCCGCTCATCTCGTGCGACATCAAGCTATACTCTAATAT	234	242	Microtubule-associated protein RP/EB family member 2	http://www.ncbi.nlm.nih.gov/protein/NP_001137299.1	Microtubule-associated protein RP/EB family member 2	http://www.uniprot.org/uniprot/Q15555	Homo sapiens	http://purl.obolibrary.org/obo/NCBITaxon_9606	Homo sapiens	http://purl.obolibrary.org/obo/NCBITaxon_9606
[truncated: 11,180 more rows]
