# Supplementary material for: T cell antigen discovery via trogocytosis
Source: Springer Nature journal article supplement (doi:10.1038/s41592-018-0305-7), 2019-01-28
Supplement: MOESM6 [file 41592_2018_305_MOESM6_ESM.xlsx]

## Sheet: Figure 2
Figure 2A
upper panel		F5-Jurkat			1G4-Jurkat
	A2-K562 nopeptide	0.98	1.22	1.16	1.21	1.34	1.27
	A2-K562 with Mart1 peptide 0.016uM	4.13	4.32	4.1	1.17	1.3	1.45
	A2-K562 with Mart1 peptide 0.080uM	8.15	8.52	8.01	1.62	1.5	1.7
	A2-K562 with Mart1 peptide 0.400uM	15.6	16.3	15.2	1.94	1.82	1.92
	A2-K562 with Mart1 peptide 2uM	34.3	33.4	36.1	2.18	2.1	2.5
	A2-K562 with Mart1 peptide 10uM	46.5	47	45.8	3.81	3.53	3.62
lower panel		F5-Jurkat			1G4-Jurkat
	A2-K562 nopeptide	1.01	1.02	1.05	1	1.03	0.97
	A2-K562 with NYESO1 peptide 0.016uM	1.4	1.54	1.34	3.81	3.98	4.1
	A2-K562 with NYESO1 peptide 0.080uM	1.6	1.3	1.56	5.24	5.4	5.7
	A2-K562 with NYESO1 peptide 0.400uM	1.39	1.45	1.4	9.96	10.2	10.5
	A2-K562 with NYESO1 peptide 2uM	1.89	1.78	1.67	16.4	16.7	17.1
	A2-K562 with NYESO1 peptide 10uM	1.75	1.59	1.8	30.1	32.1	31.1
Figure 2B
		F5-Jurkat			1G4-Jurkat
	A2-K562 nopeptide	1.73	1.69	1.64	1.01	0.98	1.04
	A2-K562 with ELAGIGILTV peptide	59.8	60.1	59.5	1.98	2.01	2.04
	A2-K562 with AAGIGILTV peptide	12.1	12.6	13.1	2.05	2.3	2.23
	A2-K562 with EAAGIGILTV peptide	32.2	33.5	31.2	2.98	3.23	2.97
	A2-K562 with AAGIGILTVI peptide	6.37	5.9	6.99	2.66	2.77	2.89
	A2-K562 with GIGILTVIL peptide	2.72	2.67	3.01	1.98	1.99	2.05
	A2-K562 with ILVILGVL peptide	4.07	4.23	4.12	2.27	2.28	2.4
Figure 2C
		F5-Jurkat			F5-CD8-Jurkat			1G4-Jurkat			1G4-CD8-Jurkat
	MART1-K562	24.8	23.9	32.4	80.8	81.3	82.7	0.89	1.12	1.17	1.71	1.61	1.75
	NYESO1-K562	1.18	1.29	1.37	2.59	2.21	2.16	32.4	25.3	25.5	68.2	68.6	67.1
