# Supplementary material for: T cell antigen discovery via trogocytosis
Source: Springer Nature journal article supplement (doi:10.1038/s41592-018-0305-7), 2019-01-28
Supplement: MOESM7 [file 41592_2018_305_MOESM7_ESM.xlsx]

## Sheet: Figure 4
Figure 4C
F5-TCR detramer staining (upper panel)		F5-coculture	1G4-coculture
	Round1 sorting	37	0.3
	Round2 sorting	95	0.3
1G4-TCR detramer staining (upper panel)		F5-coculture	1G4-coculture
	Round1 sorting	0.22	25
	Round2 sorting	0.31	86
Figure 4D
F5-coculture (left panel)
	Peptide sequence	index4	index7	index8	Rank av
	SAAGIGILTV + MCM(S1, A2)	2	1	1	1.33333
	ELAGIGIATV	7	3	4	4.66667
	GVAGIGILTG + MCM(G1, V2, G10)	9	8	2	6.33333
	ALAGIGILTV	24	2	6	10.6667
	ELAGIGILTV	31	4	7	14
	ELAAIGILTV	8	31	10	16.3333
	EAAGIGILTV	44	6	3	17.6667
	LLAGIGTVPI	41	10	8	19.6667
	ELAGIGILAV	1	45	15	20.3333
	SLLMWITQV	47	7	22	25.3333
	ALNDHFVKL	36	9	76	40.3333
	LLDEQQVNV	145	5	5	51.6667
	SLLMWITQC	79	42	50	57
	LLLPGVIKTV	3	68	100	57
	SLDESTQESKL	20	84	67	57
	FIVSEDGLIVT	4	69	108	60.3333
	IHDLLEPKGPL	5	77	104	62
	YLMQNWEHVL	6	77	108	63.6667
	KLQEQLEATV	12	84	107	67.6667
1G4-coculture (right panel)
	Peptide sequence	index2	index5	index9	index10	ave rank
	SLLMWITQV	1	1	1	1	1
	SLLMWITQC	2	2	2	2	2
	FLDELGFLE	3	60	30	50	35.75
	NLVPMVATV	51	35	27	43	39
	GLNDRSDAV	5	65	44	53	41.75
	KLQARVVEV	6	71	38	55	42.5
	TLDDKKVYL	7	72	43	54	44
	KLGDFPYVSI	4	68	49	56	44.25
	ALYDVVSKL	8	76	42	62	47
	ALNDHFVKL	142	43	5	6	49
	NLVPIVATV	57	63	34	49	50.75
	SLDEELDRV	130	5	34	48	54.25
	SMDENLMHI	10	81	47	81	54.75
	LLRAESLPGA	11	78	64	77	57.5
	FQNPFRSEL	12	93	64	74	60.75
	AGLAPYKLRPV	9	86	84	70	62.25
	YLFEEIAKI	19	95	77	92	70.75
	YLIEEIGDVLL	13	93	101	87	73.5
	YLLDHAPPEI	15	96	108	100	79.75
